# Supplementary material for: On the size, shape and energetics of the hydration shell around alkanes
Source: Royal Society of Chemistry journal article supplement (doi:10.1039/d1cp02888j), 2021-01-01
Supplement: d1cp02888j1.pdf [file d1cp02888j1.pdf]

**Supporting Information:**

*Giuseppe Lanza\* and Maria A. Chiacchio*

Dipartimento di Scienze del Farmaco, Università di Catania, Viale A. Doria 6, Catania, Italy

\*E-mail: [ganza@unict.it](mailto:ganza@unict.it)

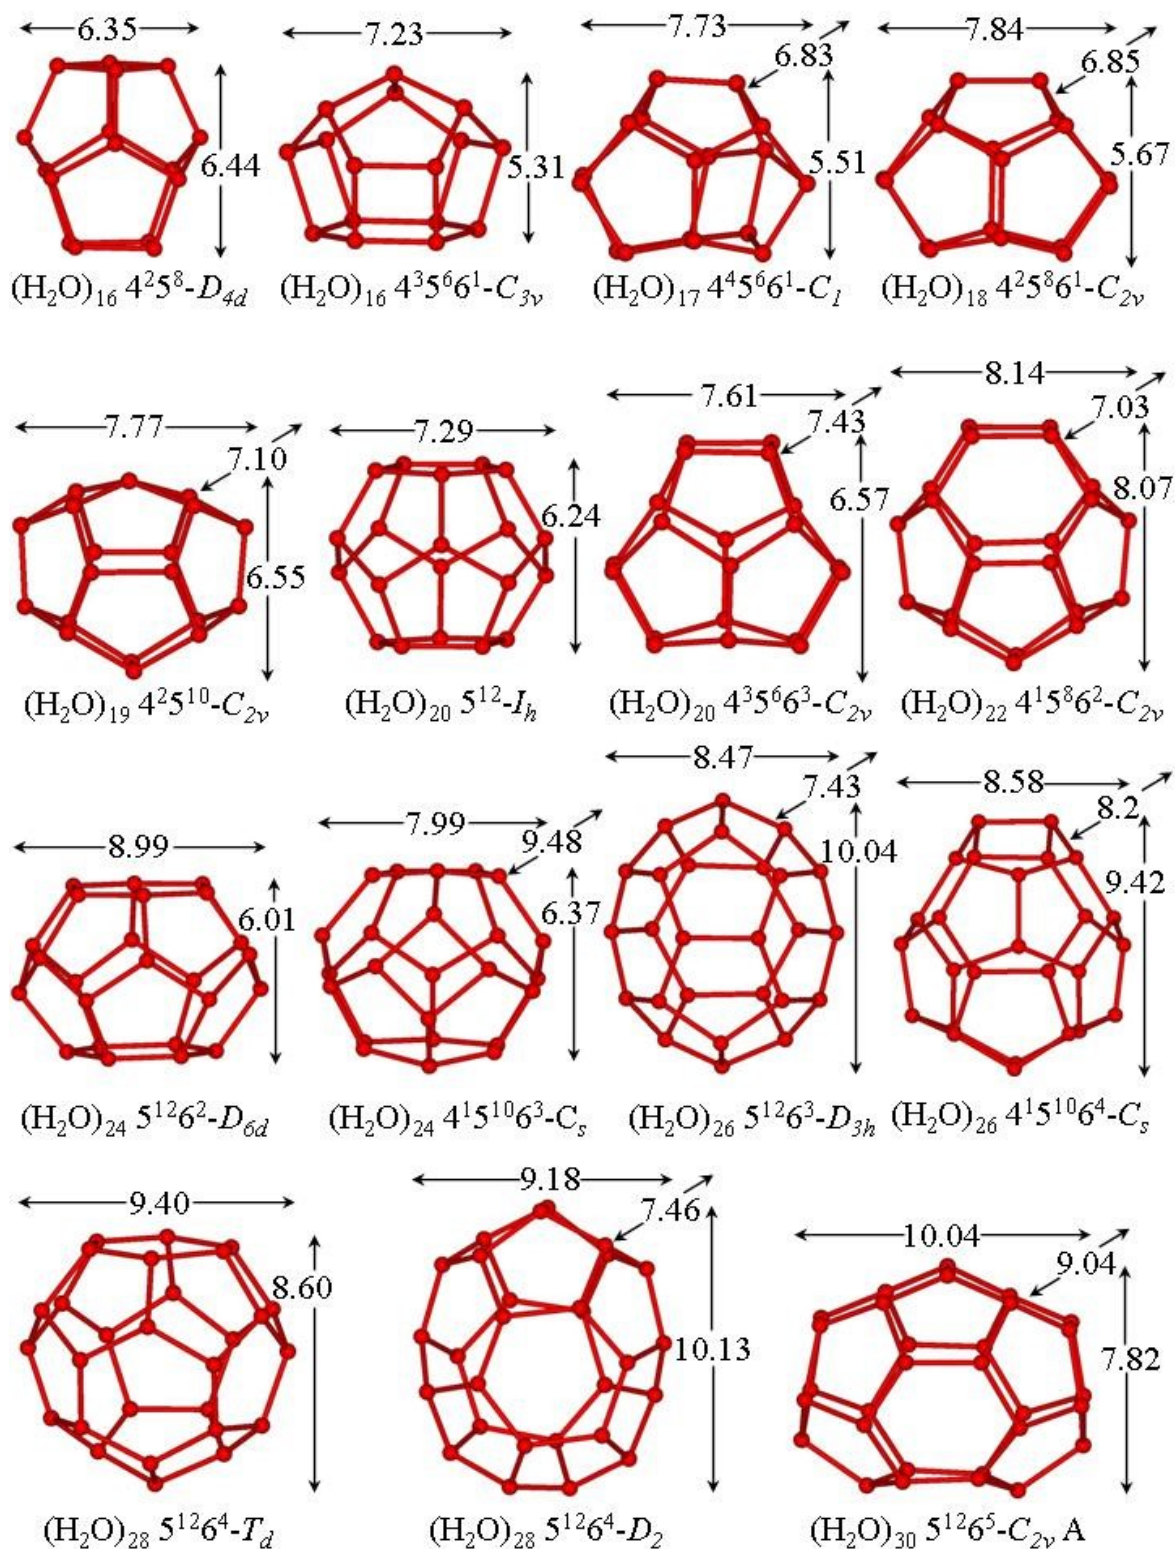

Fig. S1. MP2/6-31+G\*/PCM optimized structure of the hollow  $(\text{H}_2\text{O})_n$  cages,  $n=16-30$ . Water's hydrogen atoms have been removed for clarity and the sticks show the oxygen atoms hydrogen bonded.

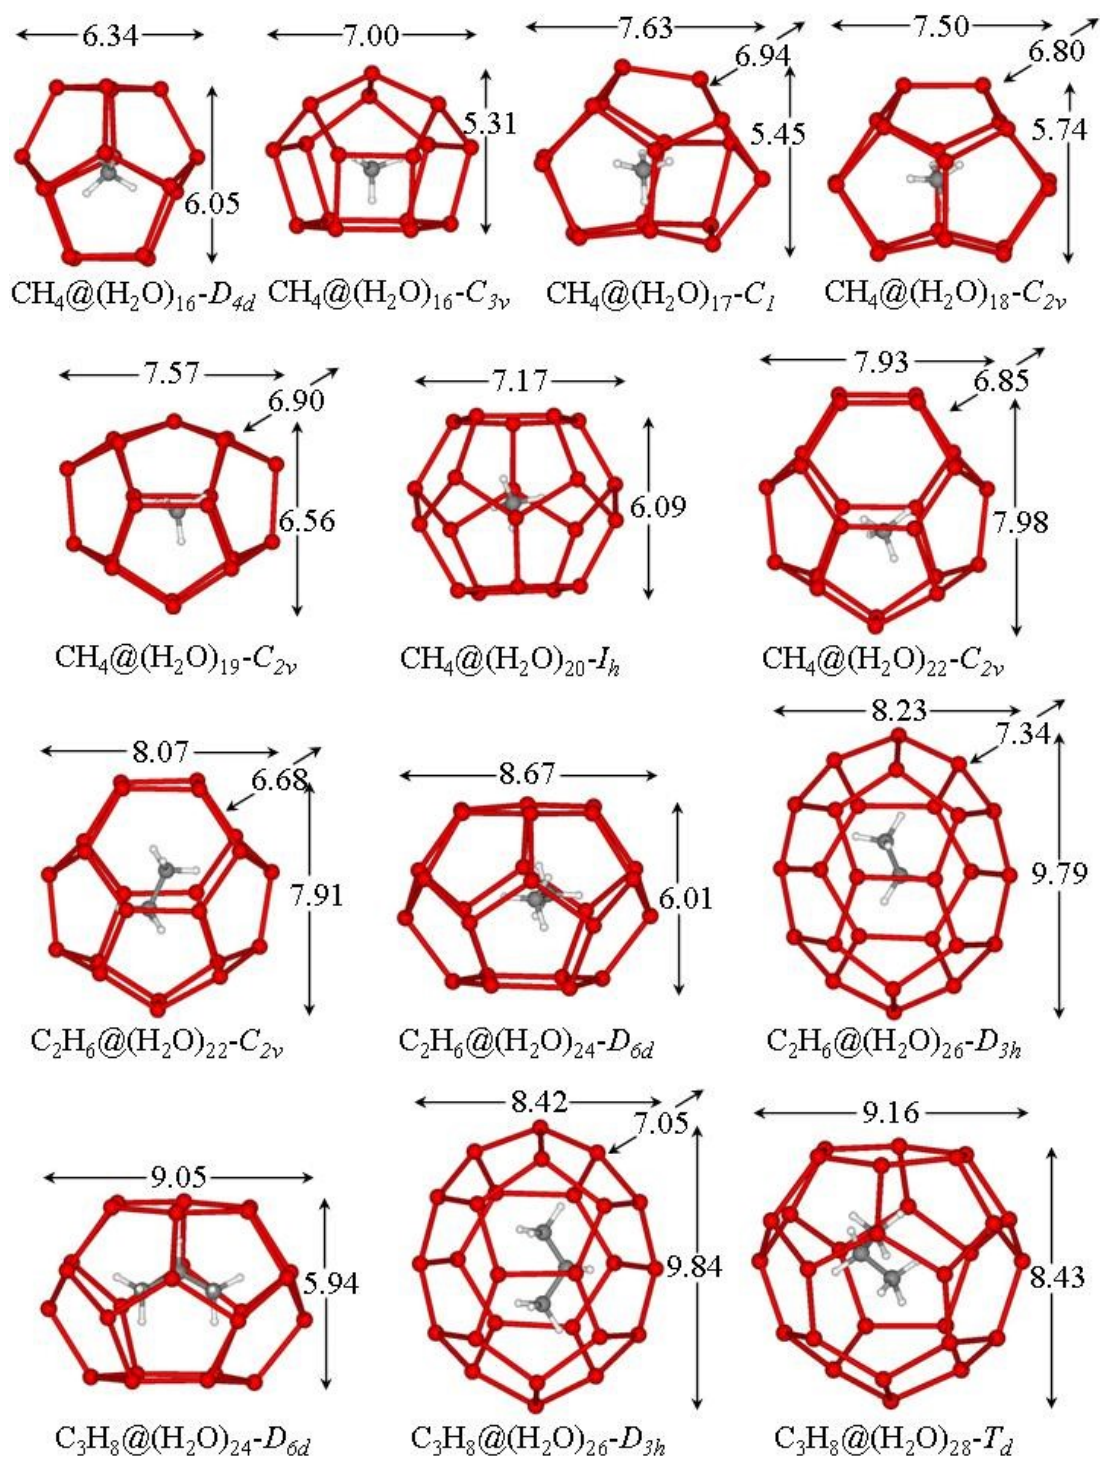

Fig. S2. M06-2X/6-31+G\*/PCM optimized structure of the methane, ethane and propane clathrates. Water's hydrogen atoms have been removed for clarity and the sticks show the oxygen atoms hydrogen bonded.



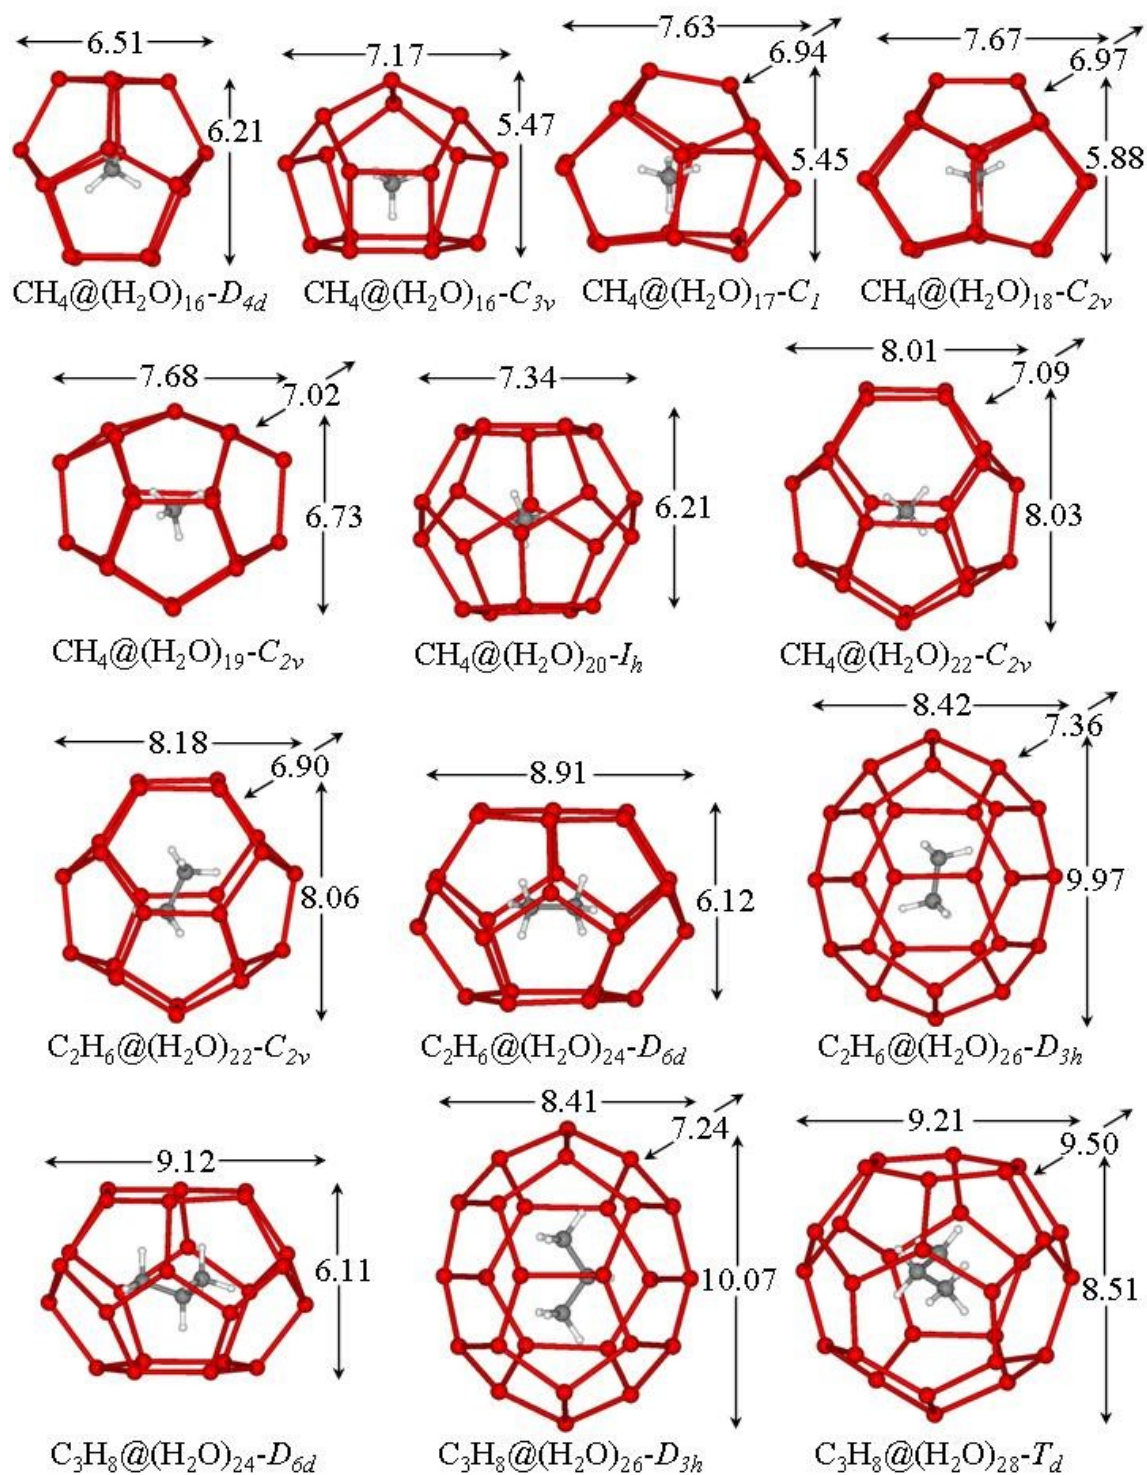

Fig. S3. MP2/6-31+G\*/PCM optimized structure of the methane, ethane and propane clathrates. Water's hydrogen atoms have been removed for clarity and the sticks show the oxygen atoms hydrogen bonded.

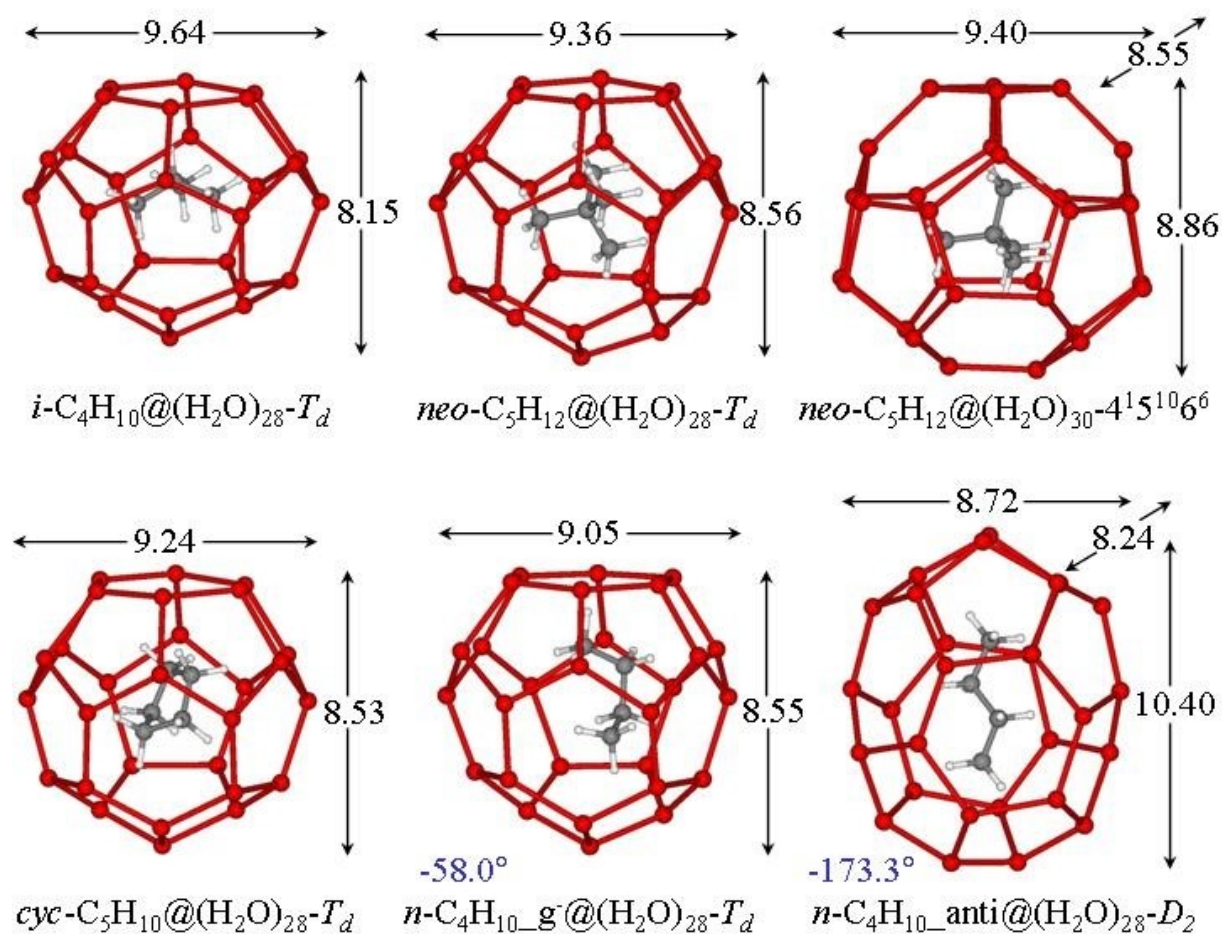

Fig. S4. MP2/6-31+G\*/PCM optimized structure of the isobutane, neopentane, cyclopentane and *n*-butane clathrates. Water's hydrogen atoms have been removed for clarity and the sticks show the oxygen atoms hydrogen bonded.

**Table S1.** M06-2X Relative Electronic, Gibbs Energies (kcal mol<sup>-1</sup>) and Entropy (cal mol<sup>-1</sup>K<sup>-1</sup>) of long chain alkane conformers in the gas-phase

|                                                                 |        |        | $\Delta E$ | $\Delta S^\circ_{298}$ | $\Delta G^\circ_{298}$ |
|-----------------------------------------------------------------|--------|--------|------------|------------------------|------------------------|
| <i>n</i> -butane_anti                                           | 180.0  |        | 0.0        | 0.0                    | 0.0                    |
| <i>n</i> -butane_g <sup>-</sup>                                 | -61.4  |        | 0.5        | -0.4                   | 0.8                    |
| <i>n</i> -pentane_anti/anti                                     | 180.0  | 180.0  | 0.0        | 0.0                    | 0.0                    |
| <i>n</i> -pentane_g <sup>-</sup> /anti                          | -61.5  | -174.6 | 0.5        | 1.1                    | 0.2                    |
| <i>n</i> -pentane_g <sup>-</sup> /g <sup>+</sup>                | -59.0  | 95.9   | 2.5        | -0.2                   | 2.7                    |
| <i>n</i> -pentane_g <sup>-</sup> /g <sup>-</sup>                | -56.9  | 56.9   | 0.6        | -1.8                   | 1.3                    |
| <i>n</i> -hexane_anti/anti/anti                                 | 180.0  | 180.0  | 180.0      | 0.0                    | 0.0                    |
| <i>n</i> -hexane_g <sup>-</sup> /g <sup>-</sup> /anti           | -56.7  | -57.0  | -174.4     | 0.6                    | -0.7                   |
| <i>n</i> -hexane_g <sup>-</sup> /anti/g <sup>-</sup>            | -60.8  | -168.5 | -60.8      | 1.0                    | 0.1                    |
| <i>n</i> -hexane_g <sup>-</sup> /anti/g <sup>+</sup>            | -63.0  | 180.0  | 63.1       | 1.2                    | 1.9                    |
| <i>n</i> -hexane_g <sup>-</sup> /anti/anti                      | -61.3  | -174.2 | -179.2     | 0.5                    | 1.0                    |
| <i>n</i> -hexane_anti/g <sup>-</sup> /anti                      | -174.1 | -61.5  | -174.1     | 0.5                    | 0.8                    |
| <i>n</i> -hexane_g <sup>-</sup> /g <sup>-</sup> /g <sup>-</sup> | -57.8  | -55.0  | -57.8      | 0.7                    | -3.0                   |

**Table S2.** M06-2X/6-31+G\*/PCM optimized Cartesian coordinates of the (H<sub>2</sub>O)<sub>16</sub> hollow clathrate in the decahedron 4<sup>2</sup>5<sup>8</sup> configuration.

|   |           |           |           |
|---|-----------|-----------|-----------|
| O | 0.651586  | -2.007410 | 2.366411  |
| H | 0.187283  | -1.182237 | 2.650336  |
| H | 1.559113  | -1.737119 | 2.108775  |
| O | 0.646385  | -2.463286 | -1.971599 |
| H | 0.178327  | -2.760264 | -1.152037 |
| H | 0.693479  | -3.236768 | -2.553563 |
| O | -3.142482 | 1.907468  | -0.190174 |
| H | -2.267919 | 2.352629  | -0.222336 |
| H | -3.171279 | 1.410422  | 0.655121  |
| O | -0.671650 | 0.264782  | 3.123992  |
| H | -0.237693 | 1.052231  | 2.734253  |
| H | -1.578323 | 0.239813  | 2.750433  |
| O | -3.200741 | -0.110236 | -1.945189 |
| H | -3.226420 | 0.705666  | -1.373416 |
| H | -3.973085 | -0.072949 | -2.528485 |
| O | 3.164261  | 1.465963  | 1.229866  |
| H | 3.197485  | 1.531459  | 0.251355  |
| H | 2.298624  | 1.840600  | 1.500812  |
| O | -3.197098 | 0.115141  | 1.946639  |
| H | -3.971217 | 0.080816  | 2.527757  |
| H | -3.224866 | -0.700326 | 1.374205  |
| O | 3.157290  | -1.469411 | -1.233885 |
| H | 2.290832  | -1.843047 | -1.503411 |
| H | 3.191857  | -1.534285 | -0.255349 |
| O | 0.652375  | 2.005938  | -2.366173 |
| H | 1.560027  | 1.734444  | -2.110025 |
| H | 0.186306  | 1.181213  | -2.648817 |

|   |           |           |           |
|---|-----------|-----------|-----------|
| O | -3.145578 | -1.901869 | 0.191548  |
| H | -2.271879 | -2.348683 | 0.223091  |
| H | -3.174899 | -1.405257 | -0.653987 |
| O | 3.188634  | -1.190366 | 1.537570  |
| H | 3.220134  | -0.194152 | 1.527461  |
| H | 3.947479  | -1.492467 | 2.058239  |
| O | 3.189689  | 1.186229  | -1.541766 |
| H | 3.944997  | 1.484850  | -2.069484 |
| H | 3.217358  | 0.189763  | -1.531350 |
| O | -0.637574 | -3.116552 | 0.345414  |
| H | -0.702311 | -4.067432 | 0.521139  |
| H | -0.139792 | -2.717103 | 1.120077  |
| O | -0.631613 | 3.116926  | -0.342332 |
| H | -0.693670 | 4.068177  | -0.517293 |
| H | -0.135478 | 2.716754  | -1.117609 |
| O | 0.655391  | 2.460497  | 1.972276  |
| H | 0.186421  | 2.758803  | 1.153762  |
| H | 0.704608  | 3.233474  | 2.554728  |
| O | -0.675251 | -0.263673 | -3.121754 |
| H | -0.242674 | -1.052457 | -2.733148 |
| H | -1.581803 | -0.237688 | -2.747993 |

---

**Table S3.** M06-2X/6-31+G\*/PCM optimized Cartesian coordinates of the (H<sub>2</sub>O)<sub>16</sub> hollow clathrate in the decahedron 4<sup>3</sup>5<sup>6</sup>6<sup>1</sup> configuration.

|   |           |           |           |
|---|-----------|-----------|-----------|
| O | -2.293669 | -1.334512 | 2.122234  |
| H | -2.861427 | -1.688043 | 2.823435  |
| H | -2.042758 | -2.102505 | 1.552136  |
| O | 3.584323  | 0.359332  | 0.539404  |
| H | 3.163759  | 1.263629  | 0.639599  |
| H | 4.535327  | 0.470659  | 0.687722  |
| O | -1.480620 | -2.187924 | -2.158500 |
| H | -1.646181 | -2.564342 | -1.268721 |
| H | -1.890574 | -1.295584 | -2.165410 |
| O | -1.306509 | 2.543451  | -1.932577 |
| H | -0.330663 | 2.455301  | -1.994804 |
| H | -1.505694 | 2.815904  | -1.011269 |
| O | -2.729248 | 0.292796  | -2.110393 |
| H | -2.166862 | 1.115572  | -2.146424 |
| H | -3.416983 | 0.395796  | -2.784871 |
| O | 2.264930  | -1.468877 | 2.059707  |
| H | 2.810415  | -0.814172 | 1.556893  |
| H | 2.843471  | -1.840972 | 2.742217  |
| O | 1.184437  | -2.306608 | -2.276262 |
| H | 0.193436  | -2.217943 | -2.336558 |
| H | 1.455915  | -2.896308 | -2.995340 |
| O | -3.509228 | 0.637534  | 0.550955  |
| H | -3.107299 | -0.065796 | 1.104717  |
| H | -3.330206 | 0.391646  | -0.381847 |
| O | 2.319185  | 2.683935  | 0.597887  |
| H | 1.534445  | 2.633474  | 1.199964  |
| H | 1.964887  | 2.724372  | -0.315334 |

|   |           |           |           |
|---|-----------|-----------|-----------|
| O | 1.183459  | -3.358737 | 0.308930  |
| H | 1.589165  | -2.709879 | 0.923792  |
| H | 1.339413  | -3.016782 | -0.597661 |
| O | 0.175587  | 2.494022  | 2.263854  |
| H | 0.106587  | 1.561707  | 2.577610  |
| H | -0.645748 | 2.670706  | 1.759186  |
| O | 2.708021  | 0.012233  | -2.094566 |
| H | 3.090534  | -0.010458 | -1.191999 |
| H | 2.144494  | -0.787159 | -2.179699 |
| O | -1.475851 | -3.292409 | 0.415822  |
| H | -1.846015 | -4.180922 | 0.527450  |
| H | -0.481801 | -3.384093 | 0.457394  |
| O | 1.465386  | 2.377337  | -2.055810 |
| H | 1.890736  | 1.483989  | -2.174106 |
| H | 1.861101  | 2.963766  | -2.717547 |
| O | 0.040002  | -0.118095 | 3.122949  |
| H | -0.764863 | -0.562920 | 2.785008  |
| H | 0.802044  | -0.619257 | 2.765039  |
| O | -2.118957 | 2.919886  | 0.707612  |
| H | -2.682887 | 3.675399  | 0.929643  |
| H | -2.695754 | 2.108298  | 0.739827  |

---

**Table S4.** M06-2X/6-31+G\*/PCM optimized Cartesian coordinates of the (H<sub>2</sub>O)<sub>17</sub> hollow clathrate in the undecahedron 4<sup>4</sup>5<sup>6</sup>6<sup>1</sup> configuration.

|   |           |           |           |
|---|-----------|-----------|-----------|
| O | 1.758781  | 1.536780  | 1.766932  |
| H | 1.751223  | 0.620158  | 2.126736  |
| H | 2.621017  | 1.618863  | 1.309015  |
| O | -0.427830 | -3.398843 | 0.031662  |
| H | -1.200301 | -3.045269 | -0.457715 |
| H | 0.368465  | -3.117823 | -0.466833 |
| O | -2.664100 | -2.289999 | -1.224581 |
| H | -3.142837 | -1.719137 | -0.555997 |
| H | -3.310663 | -2.924962 | -1.567410 |
| O | 1.875836  | -2.558877 | -1.333667 |
| H | 2.341245  | -3.286611 | -1.772488 |
| H | 2.520863  | -2.160733 | -0.685679 |
| O | -3.314356 | 1.487357  | -1.354030 |
| H | -2.694807 | 1.016885  | -1.948218 |
| H | -2.795918 | 2.189986  | -0.907405 |
| O | 2.330490  | 1.652320  | -2.382517 |
| H | 1.865768  | 0.821687  | -2.689553 |
| H | 2.686591  | 2.088766  | -3.170399 |
| O | -1.749669 | -0.314556 | -2.878891 |
| H | -2.084018 | -1.106708 | -2.391283 |
| H | -2.109900 | -0.381352 | -3.776554 |
| O | -2.184190 | -0.138058 | 2.662389  |
| H | -2.676166 | -0.138408 | 3.497163  |
| H | -1.710346 | 0.734727  | 2.618675  |
| O | 3.521947  | -1.445550 | 0.455862  |
| H | 3.719556  | -0.515470 | 0.217082  |
| H | 3.022812  | -1.396107 | 1.299978  |
| O | -0.927350 | 2.243928  | 2.467582  |
| H | -1.305195 | 2.704942  | 1.687957  |



|   |           |           |           |
|---|-----------|-----------|-----------|
| H | 0.028363  | 2.147642  | 2.290805  |
| O | -3.807715 | -0.544962 | 0.412750  |
| H | -3.262211 | -0.394899 | 1.214316  |
| H | -3.695135 | 0.259147  | -0.149531 |
| O | 1.942754  | -1.054837 | 2.702215  |
| H | 2.304314  | -1.151103 | 3.595577  |
| H | 1.071998  | -1.551899 | 2.680606  |
| O | 0.760082  | 2.896964  | -0.480834 |
| H | 1.206574  | 2.553940  | -1.283380 |
| H | 1.014358  | 2.287063  | 0.240635  |
| O | 1.044568  | -0.561882 | -3.077533 |
| H | 0.072706  | -0.464663 | -2.983821 |
| H | 1.312844  | -1.293722 | -2.479208 |
| O | -0.388260 | -2.274580 | 2.522738  |
| H | -0.432308 | -2.684286 | 1.624154  |
| H | -1.052592 | -1.552754 | 2.538115  |
| O | 3.822701  | 1.288989  | -0.109613 |
| H | 4.708486  | 1.680088  | -0.138405 |
| H | 3.410293  | 1.449126  | -0.991788 |
| O | -1.796738 | 3.364892  | 0.043355  |
| H | -2.055954 | 4.297283  | 0.003106  |
| H | -0.874715 | 3.302918  | -0.318791 |

---

**Table S5.** M06-2X/6-31+G\*/PCM optimized Cartesian coordinates of the (H<sub>2</sub>O)<sub>18</sub> hollow clathrate in the undecahedron 4<sup>2</sup>5<sup>8</sup>6<sup>1</sup> configuration.

|   |           |           |           |
|---|-----------|-----------|-----------|
| O | 2.240367  | -2.351233 | 1.624149  |
| H | 1.430551  | -2.772812 | 1.236535  |
| H | 2.707121  | -3.051151 | 2.105911  |
| O | -2.388443 | -1.232651 | -2.556265 |
| H | -2.965082 | -1.398972 | -1.781408 |
| H | -2.301814 | -0.256888 | -2.601441 |
| O | 2.253041  | 1.550124  | -2.493119 |
| H | 2.864570  | 1.621543  | -1.730748 |
| H | 2.161933  | 0.587198  | -2.654688 |
| O | -2.185199 | 2.140477  | 1.988937  |
| H | -1.400512 | 2.622152  | 1.626509  |
| H | -2.614767 | 2.748519  | 2.609294  |
| O | -2.122627 | -2.370019 | 1.698713  |
| H | -1.854655 | -1.592458 | 2.246657  |
| H | -2.777614 | -2.036164 | 1.048129  |
| O | 2.199956  | -1.239837 | -2.733837 |
| H | 2.584050  | -1.615524 | -3.539688 |
| H | 1.345513  | -1.731823 | -2.567932 |
| O | -2.342097 | 1.565669  | -2.451169 |
| H | -2.759409 | 2.035666  | -3.188094 |
| H | -1.479417 | 2.035073  | -2.265119 |
| O | 2.195711  | 2.148125  | 1.877000  |
| H | 2.821602  | 1.899247  | 1.161708  |
| H | 1.972128  | 1.316008  | 2.346199  |
| O | -0.001188 | -3.382870 | 0.496683  |
| H | -0.058030 | -4.348167 | 0.563774  |
| H | -0.817497 | -3.018773 | 0.954063  |
| O | -0.031034 | -2.572821 | -2.195094 |

|   |           |           |           |
|---|-----------|-----------|-----------|
| H | -0.029571 | -2.859630 | -1.257350 |
| H | -0.868748 | -2.066949 | -2.328742 |
| O | -0.082715 | 2.829478  | -1.861570 |
| H | -0.037668 | 3.006821  | -0.898282 |
| H | 0.746346  | 2.345593  | -2.093456 |
| O | -3.904942 | -1.364889 | -0.196060 |
| H | -4.810479 | -1.708563 | -0.196081 |
| H | -3.969370 | -0.375458 | -0.090988 |
| O | 3.876469  | 1.394987  | -0.203469 |
| H | 3.939783  | 0.400066  | -0.227734 |
| H | 4.782945  | 1.736291  | -0.204514 |
| O | 0.019973  | 3.321837  | 0.903913  |
| H | 0.094308  | 4.270841  | 1.086366  |
| H | 0.845798  | 2.897912  | 1.277085  |
| O | 3.788226  | -1.258604 | -0.449642 |
| H | 3.251656  | -1.361234 | -1.266256 |
| H | 3.263009  | -1.661986 | 0.273488  |
| O | -3.831610 | 1.300815  | -0.112564 |
| H | -3.332038 | 1.503938  | -0.933548 |
| H | -3.274138 | 1.617985  | 0.630100  |
| O | 1.489685  | -0.225181 | 3.184892  |
| H | 1.790438  | -1.012518 | 2.669926  |
| H | 1.882063  | -0.310906 | 4.066882  |
| O | -1.320830 | -0.236614 | 3.214118  |
| H | -0.341558 | -0.206045 | 3.229025  |
| H | -1.613401 | 0.606804  | 2.809505  |

---

**Table S6.** M06-2X/6-31+G\*/PCM optimized Cartesian coordinates of the (H<sub>2</sub>O)<sub>19</sub> hollow clathrate in the dodecahedron 4<sup>25</sup>1<sup>0</sup> configuration.

|   |           |           |           |
|---|-----------|-----------|-----------|
| O | 1.959524  | -2.055486 | -2.276536 |
| H | 2.715216  | -1.543775 | -1.897924 |
| H | 1.624854  | -2.629027 | -1.552200 |
| O | 2.283655  | 2.010984  | 2.124423  |
| H | 1.418364  | 1.794648  | 2.578280  |
| H | 2.773891  | 2.588157  | 2.729397  |
| O | -0.942791 | 3.618138  | -0.413753 |
| H | 0.053080  | 3.569348  | -0.328821 |
| H | -1.162341 | 4.542374  | -0.605264 |
| O | 3.886369  | -0.363848 | -1.322215 |
| H | 3.471812  | 0.451115  | -1.670038 |
| H | 3.811879  | -0.312228 | -0.345856 |
| O | 1.683181  | 3.317295  | -0.263750 |
| H | 1.929371  | 2.846910  | 0.562368  |
| H | 1.915427  | 2.722553  | -1.007730 |
| O | -1.604517 | 1.904077  | -2.523881 |
| H | -0.909016 | 1.224844  | -2.591125 |
| H | -1.340073 | 2.505856  | -1.795797 |
| O | 2.267193  | 1.653783  | -2.439809 |
| H | 1.521974  | 1.095092  | -2.754615 |
| H | 2.587772  | 2.142994  | -3.212626 |
| O | -3.757207 | 0.335228  | -1.759534 |
| H | -3.100948 | 1.015403  | -2.031404 |
| H | -3.320508 | -0.503667 | -2.035213 |

|   |           |           |           |
|---|-----------|-----------|-----------|
| O | -2.154526 | -1.759143 | -2.559780 |
| H | -1.330588 | -1.262314 | -2.720808 |
| H | -1.975434 | -2.344022 | -1.784274 |
| O | 1.043773  | -3.619998 | -0.167295 |
| H | 1.362781  | -3.204241 | 0.682013  |
| H | 1.378063  | -4.529212 | -0.172636 |
| O | -2.119450 | 2.509484  | 1.776728  |
| H | -1.726180 | 2.974875  | 0.997322  |
| H | -2.619984 | 3.177603  | 2.268980  |
| O | -3.712070 | 0.335573  | 0.967862  |
| H | -3.172484 | 1.109131  | 1.234897  |
| H | -3.745838 | 0.346246  | -0.021870 |
| O | -0.033612 | 1.414726  | 3.273463  |
| H | -0.783444 | 1.795310  | 2.766827  |
| H | -0.184822 | 0.445494  | 3.304321  |
| O | -0.424047 | -1.353795 | 3.328042  |
| H | -1.249076 | -1.583327 | 2.830821  |
| H | -0.550226 | -1.684071 | 4.230449  |
| O | 0.280734  | -0.219364 | -3.116256 |
| H | 0.888612  | -0.960236 | -2.800461 |
| H | 0.271241  | -0.278745 | -4.085249 |
| O | 3.569555  | -0.303419 | 1.465862  |
| H | 3.155098  | 0.550121  | 1.745282  |
| H | 4.403977  | -0.372239 | 1.954014  |
| O | 1.837650  | -2.420394 | 2.077883  |
| H | 2.441875  | -1.672281 | 1.883234  |
| H | 1.058780  | -2.037630 | 2.535792  |
| O | -1.727865 | -3.357158 | -0.380639 |
| H | -2.037524 | -2.878461 | 0.416876  |
| H | -0.763202 | -3.490686 | -0.264102 |
| O | -2.638580 | -1.915341 | 1.846882  |
| H | -3.325606 | -2.397134 | 2.331834  |
| H | -3.062521 | -1.065515 | 1.523724  |

---

**Table S7.** M06-2X/6-31+G\*/PCM optimized Cartesian coordinates of the (H<sub>2</sub>O)<sub>20</sub> hollow clathrate in the regular dodecahedron 5<sup>12</sup> configuration.

|   |           |           |           |
|---|-----------|-----------|-----------|
| O | 1.735362  | -3.380394 | 0.306697  |
| H | 0.969207  | -3.453298 | -0.300243 |
| H | 1.369535  | -3.101807 | 1.182554  |
| O | -2.448009 | 0.436743  | 2.883033  |
| H | -2.818392 | 0.851311  | 2.075015  |
| H | -1.599485 | 0.908017  | 3.079466  |
| O | 3.591616  | 0.465608  | 1.323172  |
| H | 3.571062  | -0.245028 | 0.646549  |
| H | 3.288532  | 1.285836  | 0.875092  |
| O | -0.668796 | 2.630272  | -2.732983 |
| H | -1.074184 | 2.927639  | -1.891838 |
| H | -1.117035 | 1.790732  | -2.971129 |
| O | -0.463508 | -3.551417 | -1.439773 |
| H | -1.289539 | -3.321323 | -0.949650 |
| H | -0.591252 | -4.449899 | -1.779879 |
| O | 2.016944  | 2.217323  | -2.414920 |
| H | 1.045710  | 2.350673  | -2.539614 |

|   |           |           |           |
|---|-----------|-----------|-----------|
| H | 2.193204  | 1.269587  | -2.593188 |
| O | -2.003325 | -2.133166 | 2.487766  |
| H | -2.189755 | -1.160187 | 2.652969  |
| H | -2.495840 | -2.624790 | 3.162406  |
| O | 0.062327  | -1.666203 | -3.436137 |
| H | -0.107252 | -2.341437 | -2.744838 |
| H | 0.940242  | -1.277091 | -3.234111 |
| O | 1.990184  | -0.165279 | 3.361272  |
| H | 2.613233  | 0.075296  | 2.619824  |
| H | 2.522956  | -0.191031 | 4.169893  |
| O | 0.393080  | 3.566969  | 1.493498  |
| H | -0.351241 | 3.560137  | 0.856374  |
| H | 1.193830  | 3.322245  | 0.982357  |
| O | 2.543204  | -0.501567 | -2.867008 |
| H | 2.935949  | -0.915197 | -2.058325 |
| H | 3.179505  | -0.647497 | -3.583244 |
| O | -3.514068 | 1.548468  | 0.542015  |
| H | -3.557467 | 0.825944  | -0.148140 |
| H | -4.423419 | 1.856830  | 0.673485  |
| O | 0.758671  | -2.586985 | 2.727858  |
| H | -0.204525 | -2.413618 | 2.670261  |
| H | 1.176924  | -1.736924 | 2.984190  |
| O | -3.569264 | -0.393515 | -1.270123 |
| H | -3.260430 | -1.234757 | -0.871926 |
| H | -2.970739 | -0.206637 | -2.026746 |
| O | -0.105944 | 1.701722  | 3.453108  |
| H | 0.095135  | 2.373537  | 2.759248  |
| H | 0.638445  | 1.064165  | 3.437626  |
| O | 3.487010  | -1.599081 | -0.557648 |
| H | 4.341908  | -2.046704 | -0.647256 |
| H | 2.836704  | -2.291143 | -0.234592 |
| O | -1.775818 | 3.483048  | -0.291393 |
| H | -2.241836 | 4.328410  | -0.375517 |
| H | -2.447426 | 2.825661  | 0.016038  |
| O | -2.697633 | -2.767547 | -0.055810 |
| H | -3.409826 | -3.424965 | -0.036485 |
| H | -2.474013 | -2.571444 | 0.890462  |
| O | 2.690547  | 2.794138  | 0.088878  |
| H | 3.366833  | 3.487596  | 0.067758  |
| H | 2.457080  | 2.599033  | -0.864077 |
| O | -1.856194 | 0.185491  | -3.385143 |
| H | -2.302426 | 0.183909  | -4.245102 |
| H | -1.141004 | -0.508810 | -3.436550 |

**Table S8.** M06-2X/6-31+G\*/PCM optimized Cartesian coordinates of the (H<sub>2</sub>O)<sub>20</sub> hollow clathrate in the irregular dodecahedron 4<sup>35</sup>6<sup>3</sup> configuration.

|   |           |           |           |
|---|-----------|-----------|-----------|
| O | 1.211201  | -1.790752 | -3.016156 |
| H | 0.512160  | -2.365445 | -2.639066 |
| H | 1.969203  | -1.817281 | -2.395199 |
| O | 1.843640  | 2.507312  | -2.223615 |
| H | 1.278624  | 1.850489  | -2.730424 |
| H | 2.295346  | 3.045340  | -2.891687 |
| O | -2.813885 | -0.127761 | 2.512996  |

|   |           |           |           |
|---|-----------|-----------|-----------|
| H | -1.929275 | -0.365773 | 2.865386  |
| H | -3.032600 | -0.792639 | 1.824660  |
| O | -1.251767 | -3.793737 | 0.527668  |
| H | -0.541177 | -3.480885 | 1.127371  |
| H | -2.035091 | -3.231284 | 0.708855  |
| O | -2.797699 | 2.398802  | 1.678194  |
| H | -2.839871 | 1.448160  | 1.979751  |
| H | -3.513798 | 2.866624  | 2.132595  |
| O | 3.212514  | -2.090044 | 1.280311  |
| H | 3.330137  | -1.171305 | 1.604561  |
| H | 2.337206  | -2.388591 | 1.607415  |
| O | -3.085796 | -1.562290 | -1.979796 |
| H | -2.316318 | -2.140161 | -2.170988 |
| H | -2.822991 | -0.649847 | -2.229853 |
| O | 3.786534  | 1.027777  | -0.861998 |
| H | 3.092709  | 1.554470  | -1.314461 |
| H | 3.695699  | 0.107054  | -1.188904 |
| O | 1.271281  | 1.388757  | 3.179931  |
| H | 2.062860  | 1.181008  | 2.638973  |
| H | 0.786650  | 2.117496  | 2.722558  |
| O | -2.332365 | 0.995782  | -2.783962 |
| H | -2.869354 | 1.273402  | -3.541333 |
| H | -2.404066 | 1.727275  | -2.109515 |
| O | 3.451705  | -1.697042 | -1.353830 |
| H | 3.348280  | -1.952573 | -0.396583 |
| H | 4.213194  | -2.190766 | -1.692534 |
| O | 3.551721  | 0.635123  | 1.769555  |
| H | 4.372363  | 0.906030  | 2.207419  |
| H | 3.643132  | 0.890983  | 0.810593  |
| O | 0.355448  | 0.752314  | -3.522113 |
| H | -0.589626 | 0.816420  | -3.265426 |
| H | 0.642542  | -0.172785 | -3.324473 |
| O | -0.287829 | -0.710806 | 3.561774  |
| H | -0.357560 | -0.832506 | 4.520943  |
| H | 0.310438  | 0.082639  | 3.423257  |
| O | 0.729813  | -2.904550 | 2.298246  |
| H | 0.364544  | -2.128785 | 2.793227  |
| H | 0.885594  | -3.593479 | 2.962389  |
| O | 0.156609  | 4.004593  | -0.691424 |
| H | 0.803562  | 3.499913  | -1.244499 |
| H | 0.283577  | 4.941044  | -0.904808 |
| O | -0.923195 | -3.325680 | -2.084395 |
| H | -0.957179 | -3.568810 | -1.118928 |
| H | -1.057564 | -4.145955 | -2.581810 |
| O | -0.201701 | 3.383445  | 2.027057  |
| H | 0.038837  | 3.618830  | 1.107627  |
| H | -1.129494 | 3.068667  | 1.977929  |
| O | -2.432686 | 2.990408  | -1.014913 |
| H | -2.655533 | 2.727653  | -0.095775 |
| H | -1.540935 | 3.395883  | -0.961530 |
| O | -3.439851 | -2.063922 | 0.617721  |
| H | -4.309757 | -2.467096 | 0.756342  |
| H | -3.394010 | -1.805244 | -0.344068 |

---



**Table S9.** M06-2X/6-31+G\*/PCM optimized Cartesian coordinates of the (H<sub>2</sub>O)<sub>22</sub> hollow clathrate in the tridecahedron 4<sup>15</sup>106<sup>2</sup> configuration.

|   |           |           |           |
|---|-----------|-----------|-----------|
| O | 1.914345  | -3.699245 | 0.402172  |
| H | 2.175890  | -3.113756 | 1.145194  |
| H | 2.250462  | -3.270159 | -0.412116 |
| O | -1.679642 | -3.013128 | -2.022230 |
| H | -1.350657 | -3.382717 | -1.148795 |
| H | -1.891267 | -3.779813 | -2.576575 |
| O | -1.766204 | 2.983947  | 1.919642  |
| H | -1.337912 | 3.343242  | 1.113020  |
| H | -1.079780 | 2.478646  | 2.407161  |
| O | 2.609484  | 2.357129  | 2.134463  |
| H | 2.389752  | 2.846978  | 1.314696  |
| H | 1.754359  | 2.133123  | 2.559922  |
| O | -3.929682 | 1.613076  | 1.201471  |
| H | -3.125311 | 2.117642  | 1.509487  |
| H | -4.701433 | 2.070907  | 1.566017  |
| O | 2.774426  | 1.899535  | -2.284954 |
| H | 1.946501  | 1.596134  | -2.718641 |
| H | 2.507310  | 2.539930  | -1.590843 |
| O | 0.168946  | -1.015055 | 3.526219  |
| H | 0.999376  | -1.392501 | 3.161831  |
| H | -0.573467 | -1.495954 | 3.100894  |
| O | 0.447048  | -1.674267 | -3.252116 |
| H | -0.308431 | -2.111317 | -2.803402 |
| H | 1.259266  | -1.972266 | -2.789364 |
| O | -1.580619 | 2.572864  | -2.452165 |
| H | -0.910742 | 1.947232  | -2.801786 |
| H | -2.362984 | 2.040466  | -2.169908 |
| O | -1.921743 | -2.474021 | 2.392253  |
| H | -2.293081 | -3.063450 | 3.065870  |
| H | -2.690847 | -1.958048 | 2.021986  |
| O | 2.799398  | -2.435293 | -1.949063 |
| H | 3.323821  | -1.626098 | -1.727004 |
| H | 3.371684  | -2.987037 | -2.503196 |
| O | 0.452444  | 0.980139  | -3.519325 |
| H | 0.492862  | 1.141449  | -4.474065 |
| H | 0.407723  | -0.010198 | -3.410310 |
| O | -0.802934 | -3.942826 | 0.290496  |
| H | -1.179405 | -3.434517 | 1.041071  |
| H | 0.179339  | -3.846625 | 0.349133  |
| O | -0.665470 | 4.012404  | -0.433648 |
| H | -0.957787 | 4.925812  | -0.573476 |
| H | -1.015395 | 3.480664  | -1.208999 |
| O | 2.031614  | 3.691492  | -0.271144 |
| H | 1.062039  | 3.877737  | -0.339218 |
| H | 2.480098  | 4.546659  | -0.352383 |
| O | -3.898852 | -1.536526 | -1.458430 |
| H | -3.112777 | -2.081753 | -1.711804 |
| H | -4.670396 | -1.961770 | -1.861499 |
| O | 2.570898  | -1.995068 | 2.516535  |
| H | 3.114720  | -1.230835 | 2.168404  |
| H | 3.107522  | -2.423070 | 3.200356  |
| O | -3.814860 | 1.268402  | -1.573878 |
| H | -3.816834 | 0.292303  | -1.650558 |
| H | -3.900946 | 1.452978  | -0.614385 |

|   |           |           |           |
|---|-----------|-----------|-----------|
| O | -3.980764 | -1.163530 | 1.313959  |
| H | -3.944121 | -0.185100 | 1.383376  |
| H | -3.997523 | -1.357517 | 0.352480  |
| O | 0.198001  | 1.645990  | 3.370735  |
| H | 0.183525  | 1.961110  | 4.286989  |
| H | 0.150567  | 0.650518  | 3.420635  |
| O | 3.956472  | 0.051620  | 1.546312  |
| H | 3.480290  | 0.895361  | 1.742042  |
| H | 4.018701  | -0.009989 | 0.569630  |
| O | 4.107073  | -0.149986 | -1.250843 |
| H | 3.626707  | 0.630824  | -1.652078 |
| H | 5.023572  | -0.096450 | -1.561473 |

---

**Table S10.** M06-2X/6-31+G\*/PCM optimized Cartesian coordinates of the (H<sub>2</sub>O)<sub>24</sub> hollow clathrate in the regular tetradecahedron 5<sup>12</sup>6<sup>2</sup> configuration.

|   |           |           |           |
|---|-----------|-----------|-----------|
| O | 2.710830  | 0.338380  | -2.995271 |
| H | 3.243890  | 0.432019  | -3.799133 |
| H | 2.088987  | 1.118600  | -2.985777 |
| O | 1.703148  | 4.111770  | -0.750291 |
| H | 2.038835  | 4.978720  | -1.023635 |
| H | 0.885315  | 4.284306  | -0.220182 |
| O | 1.117980  | 2.474257  | -2.945273 |
| H | 1.304177  | 3.055036  | -2.176911 |
| H | 0.147360  | 2.325503  | -2.954720 |
| O | 3.536195  | 2.613020  | 0.759682  |
| H | 3.055679  | 2.287215  | 1.550557  |
| H | 2.897722  | 3.160079  | 0.256120  |
| O | 2.203965  | 1.605434  | 3.007242  |
| H | 2.286273  | 0.611319  | 2.992244  |
| H | 2.642711  | 1.898223  | 3.820123  |
| O | 2.710166  | -3.530748 | -0.745701 |
| H | 3.294517  | -4.254207 | -1.018015 |
| H | 3.267355  | -2.907328 | -0.216076 |
| O | 1.586063  | -2.207496 | -2.942399 |
| H | 1.995142  | -2.657961 | -2.172954 |
| H | 1.942680  | -1.292648 | -2.952913 |
| O | 4.090137  | -1.705247 | 0.723910  |
| H | 4.219234  | -0.877542 | 0.170564  |
| H | 4.973452  | -1.990901 | 1.002119  |
| O | 4.357379  | 0.478434  | -0.732602 |
| H | 3.782792  | 0.437579  | -1.527390 |
| H | 4.056604  | 1.262986  | -0.211388 |
| O | -0.356549 | 2.701304  | 2.932869  |
| H | 0.530059  | 2.279704  | 2.935333  |
| H | -0.388832 | 3.295117  | 2.152214  |
| O | 2.514979  | -1.040653 | 2.933837  |
| H | 1.706843  | -1.598123 | 2.934757  |
| H | 3.046254  | -1.308364 | 2.153340  |
| O | -1.648663 | 2.174255  | -2.996257 |
| H | -1.997090 | 2.587829  | -3.800446 |
| H | -2.013113 | 1.245418  | -2.985384 |
| O | -1.060099 | -2.518898 | -2.994002 |
| H | -1.244075 | -3.027892 | -3.797878 |

|   |           |           |           |
|---|-----------|-----------|-----------|
| H | -0.073595 | -2.369711 | -2.983199 |
| O | 0.494430  | -4.369418 | 0.761122  |
| H | 1.288160  | -4.089659 | 0.258855  |
| H | 0.451498  | -3.791016 | 1.552442  |
| O | -1.764457 | -4.013411 | -0.731344 |
| H | -1.512651 | -3.495521 | -1.526252 |
| H | -0.934530 | -4.145365 | -0.210334 |
| O | -3.522148 | -2.687719 | 0.723320  |
| H | -2.869249 | -3.213872 | 0.171313  |
| H | -4.210902 | -3.309764 | 1.002517  |
| O | -4.412418 | -0.581509 | -0.748847 |
| H | -4.151391 | -1.375042 | -0.217990 |
| H | -5.331055 | -0.726449 | -1.021196 |
| O | -2.493245 | 1.109384  | 3.004780  |
| H | -2.965184 | 1.343235  | 3.818201  |
| H | -1.673362 | 1.677607  | 2.989558  |
| O | -2.591425 | 3.533539  | -0.735273 |
| H | -2.268027 | 3.054718  | -1.528771 |
| H | -3.121948 | 2.882251  | -0.213873 |
| O | -0.566476 | 4.395738  | 0.720895  |
| H | -1.347821 | 4.092261  | 0.168529  |
| H | -0.761920 | 5.303430  | 0.998721  |
| O | -4.033032 | 1.757754  | 0.757779  |
| H | -4.187337 | 0.930453  | 0.255531  |
| H | -3.511103 | 1.505657  | 1.549369  |
| O | -2.160244 | -1.655529 | 2.933585  |
| H | -2.658098 | -1.981708 | 2.153272  |
| H | -2.239634 | -0.676957 | 2.935053  |
| O | 0.285939  | -2.710362 | 3.006732  |
| H | 0.320500  | -3.234253 | 3.821235  |
| H | -0.616019 | -2.284083 | 2.991408  |
| O | -2.702592 | -0.272396 | -2.943615 |
| H | -2.088935 | -1.038995 | -2.952516 |
| H | -3.299060 | -0.400959 | -2.175443 |

**Table S11.** M06-2X/6-31+G\*/PCM optimized Cartesian coordinates of the (H<sub>2</sub>O)<sub>24</sub> hollow clathrate in the irregular tetradecahedron 4<sup>15</sup>10<sup>6</sup>3 configuration.

|   |           |           |           |
|---|-----------|-----------|-----------|
| O | 0.757840  | -2.096568 | -3.324025 |
| H | 0.902316  | -2.517163 | -4.184936 |
| H | 1.249341  | -1.229282 | -3.355348 |
| O | 4.318414  | 0.068298  | -1.626703 |
| H | 5.161563  | 0.122060  | -2.101436 |
| H | 4.298641  | 0.841971  | -1.010078 |
| O | 2.147553  | 0.178332  | -3.394860 |
| H | 2.905081  | 0.160543  | -2.771841 |
| H | 1.660611  | 1.012792  | -3.219317 |
| O | 4.005714  | -2.345620 | -0.217727 |
| H | 3.787811  | -2.114705 | 0.709235  |
| H | 4.140072  | -1.495793 | -0.686711 |
| O | 3.306708  | -1.713283 | 2.428841  |
| H | 2.395106  | -2.034201 | 2.641621  |
| H | 3.896235  | -2.118476 | 3.082569  |
| O | -2.398444 | -3.510136 | -0.441171 |
| H | -2.751549 | -4.383087 | -0.671160 |

|   |           |           |           |
|---|-----------|-----------|-----------|
| H | -1.520716 | -3.676056 | 0.015721  |
| O | -1.967627 | -2.032252 | -2.779669 |
| H | -2.094851 | -2.551118 | -1.956417 |
| H | -1.001617 | -2.015839 | -2.956369 |
| O | -0.053009 | -3.964201 | 0.679468  |
| H | 0.656396  | -3.839437 | 0.000182  |
| H | 0.189724  | -3.408905 | 1.450227  |
| O | 1.833597  | -3.674371 | -1.257939 |
| H | 1.475728  | -3.123628 | -1.985482 |
| H | 2.624597  | -3.195862 | -0.914218 |
| O | 3.363070  | 1.077880  | 2.583653  |
| H | 3.367343  | 0.099738  | 2.507352  |
| H | 3.641830  | 1.431009  | 1.711061  |
| O | 0.747834  | -2.516040 | 2.945307  |
| H | 0.218832  | -1.709875 | 3.217510  |
| H | 0.713732  | -3.124646 | 3.699006  |
| O | 0.861973  | 2.602812  | -2.930867 |
| H | 0.986349  | 3.183725  | -3.696479 |
| H | -0.120521 | 2.580496  | -2.758693 |
| O | -3.251674 | 0.298078  | -2.730939 |
| H | -3.765064 | 0.341325  | -3.551723 |
| H | -2.743402 | -0.560540 | -2.766749 |
| O | -4.170070 | -2.029468 | 0.996957  |
| H | -3.532082 | -2.611110 | 0.513153  |
| H | -4.872997 | -2.608014 | 1.328288  |
| O | -4.917586 | 0.209587  | -0.498082 |
| H | -4.350041 | 0.239475  | -1.299916 |
| H | -4.718664 | -0.643463 | -0.055953 |
| O | -4.102151 | 1.991480  | 1.295384  |
| H | -4.469365 | 1.391280  | 0.584961  |
| H | -4.859957 | 2.446233  | 1.693207  |
| O | -2.277587 | 3.642063  | 0.133933  |
| H | -2.957033 | 3.083270  | 0.586972  |
| H | -2.664780 | 4.527573  | 0.060427  |
| O | 0.927856  | 1.944580  | 3.255594  |
| H | 1.016369  | 2.408605  | 4.101926  |
| H | 1.845281  | 1.632730  | 3.017219  |
| O | 2.120524  | 3.695777  | -0.679842 |
| H | 1.676236  | 3.316876  | -1.468802 |
| H | 1.432899  | 3.749573  | 0.028477  |
| O | 4.104428  | 2.149871  | 0.116512  |
| H | 3.367628  | 2.758326  | -0.191512 |
| H | 4.900446  | 2.697417  | 0.192856  |
| O | 0.259897  | 3.845318  | 1.313593  |
| H | -0.648566 | 3.716951  | 0.970071  |
| H | 0.415834  | 3.151814  | 1.989493  |
| O | -3.172017 | -0.168779 | 2.849883  |
| H | -3.439930 | 0.660149  | 2.402423  |
| H | -3.468799 | -0.887990 | 2.254485  |
| O | -0.583958 | -0.361959 | 3.710317  |
| H | -1.500217 | -0.261218 | 3.358408  |
| H | -0.101255 | 0.469925  | 3.514755  |
| O | -1.754258 | 2.626093  | -2.424881 |
| H | -2.248936 | 1.783961  | -2.525550 |
| H | -1.951870 | 2.962655  | -1.524815 |

---

**Table S12.** M06-2X/6-31+G\*/PCM optimized Cartesian coordinates of the (H<sub>2</sub>O)<sub>26</sub> hollow clathrate in the regular pentadecahedron 5<sup>12</sup>6<sup>3</sup> configuration.

|   |           |           |           |
|---|-----------|-----------|-----------|
| O | 3.985024  | -2.439288 | 0.801311  |
| H | 4.700649  | -3.074640 | 0.952381  |
| H | 3.415327  | -2.824186 | 0.078556  |
| O | 2.322282  | -1.656776 | -3.291969 |
| H | 2.725331  | -2.099702 | -4.054201 |
| H | 1.441859  | -1.330739 | -3.603532 |
| O | 2.429486  | -3.424257 | -1.130118 |
| H | 2.303366  | -2.801515 | -1.877265 |
| H | 1.539264  | -3.670805 | -0.800666 |
| O | 3.919393  | 0.523013  | -2.497935 |
| H | 3.350228  | 1.322036  | -2.485661 |
| H | 3.348260  | -0.218493 | -2.788295 |
| O | 2.337173  | 2.827890  | -2.387300 |
| H | 2.309304  | 3.142778  | -1.440742 |
| H | 2.742417  | 3.544935  | -2.897796 |
| O | 2.438465  | 0.768175  | 3.578248  |
| H | 2.866699  | 0.900855  | 4.437654  |
| H | 3.027589  | 1.201036  | 2.911648  |
| O | 2.396957  | -1.996512 | 3.055638  |
| H | 2.385929  | -1.031029 | 3.222252  |
| H | 2.983243  | -2.136058 | 2.281446  |
| O | 3.975531  | 1.930461  | 1.645533  |
| H | 4.347190  | 1.228036  | 1.032454  |
| H | 4.736853  | 2.416929  | 1.996468  |
| O | 4.906308  | 0.075815  | 0.012178  |
| H | 4.601189  | -0.816613 | 0.284443  |
| H | 4.554053  | 0.221963  | -0.899775 |
| O | -0.065569 | 2.102341  | -3.587644 |
| H | 0.764169  | 2.347103  | -3.123284 |
| H | -0.019435 | 1.139092  | -3.769142 |
| O | 2.345847  | 3.637118  | 0.150083  |
| H | 1.476305  | 3.722086  | 0.598063  |
| H | 2.893583  | 3.039940  | 0.703900  |
| O | -2.341052 | -3.484368 | -1.138810 |
| H | -2.819663 | -4.257444 | -1.475619 |
| H | -2.910738 | -3.104922 | -0.408653 |
| O | -2.282757 | -2.036785 | 3.086666  |
| H | -2.677524 | -2.481867 | 3.851615  |
| H | -1.395912 | -2.474542 | 2.940584  |
| O | -0.042082 | 2.091353  | 3.589997  |
| H | 0.813226  | 1.613762  | 3.569188  |
| H | -0.016030 | 2.741416  | 2.855939  |
| O | -2.397603 | 0.716684  | 3.541189  |
| H | -2.269431 | -0.240988 | 3.370731  |
| H | -1.505346 | 1.139881  | 3.552824  |
| O | -3.952615 | 1.874446  | 1.747594  |
| H | -3.373288 | 1.435443  | 2.439438  |
| H | -4.625865 | 2.375029  | 2.232927  |
| O | -4.956197 | -0.019856 | 0.072546  |
| H | -4.652699 | 0.683948  | 0.698889  |
| H | -5.924055 | -0.028082 | 0.119304  |
| O | -2.372164 | 2.768309  | -2.431503 |
| H | -2.757640 | 3.462233  | -2.987231 |
| H | -1.491391 | 2.542805  | -2.842400 |



|   |           |           |           |
|---|-----------|-----------|-----------|
| O | -2.319065 | -1.617037 | -3.237830 |
| H | -2.278715 | -2.254441 | -2.493989 |
| H | -2.914219 | -0.882636 | -2.948260 |
| O | -0.050586 | -0.634837 | -4.171537 |
| H | -0.889953 | -1.035723 | -3.798118 |
| H | -0.115611 | -0.729815 | -5.134128 |
| O | -3.941945 | 0.453127  | -2.502056 |
| H | -4.314347 | 0.317044  | -1.605831 |
| H | -3.416052 | 1.280288  | -2.458770 |
| O | -2.378238 | 3.610060  | 0.223565  |
| H | -2.945159 | 2.981561  | 0.720182  |
| H | -2.341892 | 3.291408  | -0.704386 |
| O | -0.066566 | 3.956485  | 1.502127  |
| H | -0.101634 | 4.855962  | 1.860975  |
| H | -0.913972 | 3.831125  | 0.990434  |
| O | -3.827227 | -2.466599 | 0.812987  |
| H | -3.296882 | -2.302321 | 1.624143  |
| H | -4.230953 | -1.606949 | 0.565774  |
| O | 0.015170  | -4.255360 | 0.000723  |
| H | 0.009929  | -5.224351 | 0.026437  |
| H | -0.829888 | -3.991397 | -0.441513 |
| O | 0.020255  | -3.276123 | 2.634636  |
| H | 0.858311  | -2.774951 | 2.782630  |
| H | 0.048224  | -3.604311 | 1.711441  |

---

**Table S13.** M06-2X/6-31+G\*/PCM optimized Cartesian coordinates of the (H<sub>2</sub>O)<sub>26</sub> hollow clathrate in the irregular pentadecahedron 4<sup>15</sup>10<sup>6</sup>4 configuration.

|   |           |           |           |
|---|-----------|-----------|-----------|
| O | -2.538079 | -3.855829 | -0.298343 |
| H | -2.937490 | -4.734789 | -0.379222 |
| H | -1.625183 | -3.994719 | 0.080134  |
| O | 0.129453  | -2.710343 | 3.097223  |
| H | 0.171942  | -3.381199 | 3.795989  |
| H | 0.949610  | -2.146797 | 3.212621  |
| O | -0.094132 | -4.163730 | 0.720655  |
| H | 0.056297  | -3.602542 | 1.511399  |
| H | 0.609839  | -3.955134 | 0.070553  |
| O | -2.216339 | -1.330158 | 3.374383  |
| H | -2.565229 | -1.577629 | 4.244212  |
| H | -1.350778 | -1.801061 | 3.287662  |
| O | -2.263540 | 1.489468  | 3.245924  |
| H | -2.920696 | 1.719648  | 2.547449  |
| H | -2.197482 | 0.513080  | 3.256309  |
| O | -3.740840 | -0.093506 | -2.518298 |
| H | -4.443735 | -0.115563 | -3.185452 |
| H | -4.199526 | -0.093560 | -1.641962 |
| O | -2.300145 | -2.503993 | -2.732822 |
| H | -2.773302 | -1.650286 | -2.648100 |
| H | -2.422869 | -2.974362 | -1.880810 |
| O | -4.895581 | -0.089276 | -0.042785 |
| H | -4.567036 | -0.871308 | 0.487943  |
| H | -5.862224 | -0.156989 | -0.059093 |
| O | -3.977688 | -2.148367 | 1.358243  |
| H | -3.475924 | -2.770728 | 0.786878  |

|   |           |           |           |
|---|-----------|-----------|-----------|
| H | -3.358923 | -1.867536 | 2.066535  |
| O | 2.265564  | 1.534168  | 3.524443  |
| H | 1.433883  | 2.032143  | 3.284294  |
| H | 2.557136  | 1.891892  | 4.376134  |
| O | -4.047313 | 2.228638  | 1.288623  |
| H | -3.565785 | 2.791471  | 0.647577  |
| H | -4.357319 | 1.444046  | 0.789473  |
| O | 4.016679  | -2.287682 | -0.871902 |
| H | 4.810921  | -2.776155 | -1.137152 |
| H | 3.980750  | -1.478181 | -1.458427 |
| O | 1.559960  | -0.165094 | -3.932721 |
| H | 1.774168  | -0.199380 | -4.877179 |
| H | 1.070568  | -1.013040 | -3.729192 |
| O | -2.306648 | 2.304021  | -2.829125 |
| H | -2.786921 | 1.458720  | -2.705234 |
| H | -2.446727 | 2.825698  | -2.011670 |
| O | 0.360892  | 2.292112  | -3.395897 |
| H | 0.709954  | 1.388653  | -3.554298 |
| H | -0.603449 | 2.211753  | -3.197908 |
| O | 1.662988  | 3.662877  | -1.567728 |
| H | 1.165594  | 3.132415  | -2.263124 |
| H | 1.922281  | 4.490826  | -2.001535 |
| O | 3.929837  | 2.255318  | -0.934956 |
| H | 3.119358  | 2.783810  | -1.136391 |
| H | 4.678774  | 2.796278  | -1.228452 |
| O | 0.055484  | 2.874601  | 2.916063  |
| H | 0.036074  | 3.299506  | 2.034788  |
| H | -0.780084 | 2.353119  | 3.004644  |
| O | 4.427986  | -1.333764 | 1.748539  |
| H | 4.260351  | -1.685678 | 0.850122  |
| H | 4.507058  | -0.355898 | 1.649545  |
| O | 2.307299  | -1.259440 | 3.470203  |
| H | 3.045517  | -1.390817 | 2.826416  |
| H | 2.188013  | -0.287354 | 3.531211  |
| O | 4.388727  | 1.414858  | 1.706938  |
| H | 4.158758  | 1.759929  | 0.819805  |
| H | 3.615610  | 1.579533  | 2.286928  |
| O | -0.059265 | 4.274050  | 0.465854  |
| H | 0.589691  | 4.048851  | -0.246675 |
| H | 0.095971  | 5.206419  | 0.682223  |
| O | -2.595613 | 3.842247  | -0.497471 |
| H | -3.014871 | 4.698109  | -0.672923 |
| H | -1.696026 | 4.043179  | -0.143794 |
| O | 3.887483  | -0.126530 | -2.412463 |
| H | 3.067075  | -0.117640 | -2.953761 |
| H | 3.889276  | 0.707242  | -1.895250 |
| O | 1.765480  | -3.758450 | -1.323945 |
| H | 2.052538  | -4.631541 | -1.631943 |
| H | 2.594109  | -3.249203 | -1.140572 |
| O | 0.355181  | -2.463412 | -3.379474 |
| H | -0.601412 | -2.436511 | -3.135592 |
| H | 0.819226  | -2.922972 | -2.648428 |

---

**Table S14.** M06-2X/6-31+G\*/PCM optimized Cartesian

coordinates of the  $(\text{H}_2\text{O})_{28}$  hollow clathrate in the hexadecahedron  $5^{12}6^4$ - $T_d$  configuration.

|   |           |           |           |
|---|-----------|-----------|-----------|
| O | -0.370239 | 4.726595  | 0.563571  |
| H | -1.175710 | 4.322228  | 0.971216  |
| H | -0.455038 | 5.683750  | 0.689720  |
| O | -0.030333 | -2.063809 | 4.249783  |
| H | -0.002470 | -2.759574 | 3.560308  |
| H | -0.875812 | -1.583756 | 4.119628  |
| O | -3.748180 | -1.548847 | -2.539061 |
| H | -4.514854 | -1.846413 | -3.051813 |
| H | -4.110635 | -1.094176 | -1.738796 |
| O | 4.092754  | -1.069871 | -2.222516 |
| H | 3.588807  | -1.892507 | -2.045069 |
| H | 3.532722  | -0.517153 | -2.807200 |
| O | 0.328015  | -3.250865 | -3.049380 |
| H | 1.147800  | -3.307882 | -2.513840 |
| H | 0.364812  | -2.394791 | -3.524302 |
| O | 0.319838  | -0.817936 | -4.469886 |
| H | 0.382993  | -1.012637 | -5.417410 |
| H | 1.107258  | -0.258184 | -4.256670 |
| O | -1.642404 | 2.009175  | 3.670311  |
| H | -0.663035 | 2.020048  | 3.746198  |
| H | -1.920128 | 1.067778  | 3.703244  |
| O | -3.858984 | 2.262470  | -0.472335 |
| H | -3.327265 | 2.423771  | -1.282401 |
| H | -3.361061 | 2.645451  | 0.281314  |
| O | -2.438388 | 2.652679  | -2.835878 |
| H | -2.323795 | 1.770374  | -3.286840 |
| H | -2.959284 | 3.198479  | -3.443945 |
| O | 3.829390  | -1.339782 | 2.151484  |
| H | 4.119740  | -0.734236 | 1.410098  |
| H | 4.641360  | -1.620463 | 2.599871  |
| O | 3.631713  | 2.799372  | -0.070385 |
| H | 3.011122  | 3.124675  | 0.639493  |
| H | 4.380829  | 3.414161  | -0.070247 |
| O | 2.354709  | 2.903174  | -2.560133 |
| H | 2.788303  | 2.866380  | -1.680420 |
| H | 1.450803  | 3.273040  | -2.413208 |
| O | -2.190310 | -3.956346 | 0.806988  |
| H | -2.103449 | -3.859353 | -0.187033 |
| H | -2.703595 | -4.765950 | 0.951568  |
| O | -0.102631 | 4.025168  | -2.145477 |
| H | -0.225920 | 4.273204  | -1.205607 |
| H | -0.898525 | 3.511738  | -2.399704 |
| O | 0.120727  | -4.046980 | 2.259563  |
| H | 0.152364  | -4.930113 | 2.657686  |
| H | -0.691458 | -4.033086 | 1.695180  |
| O | -4.629011 | -0.268485 | -0.292983 |
| H | -4.331444 | 0.685852  | -0.327389 |
| H | -5.596377 | -0.246357 | -0.235080 |
| O | 4.628020  | 0.198429  | 0.143151  |
| H | 4.244669  | 1.100555  | 0.102748  |
| H | 4.425205  | -0.233920 | -0.721626 |
| O | -2.540221 | 3.486826  | 1.663977  |
| H | -2.219904 | 2.902920  | 2.411020  |
| H | -3.161875 | 4.114848  | 2.062504  |
| O | 2.716626  | -3.430309 | -1.616556 |

|   |           |           |           |
|---|-----------|-----------|-----------|
| H | 3.223377  | -4.203181 | -1.907427 |
| H | 2.646815  | -3.501635 | -0.624147 |
| O | 2.084521  | -0.337124 | 4.085601  |
| H | 1.334914  | -0.979456 | 4.121529  |
| H | 2.685622  | -0.645996 | 3.374283  |
| O | -2.212355 | 0.268919  | -4.007686 |
| H | -2.719044 | -0.401347 | -3.501440 |
| H | -1.307161 | -0.089386 | -4.128677 |
| O | 1.954548  | 3.741500  | 1.775921  |
| H | 1.127504  | 4.080514  | 1.371982  |
| H | 1.684046  | 3.137243  | 2.501453  |
| O | -2.070939 | -3.673986 | -1.816733 |
| H | -2.649371 | -2.929928 | -2.086895 |
| H | -1.188032 | -3.507455 | -2.227309 |
| O | 2.561125  | 0.614495  | -3.864322 |
| H | 3.068593  | 0.820437  | -4.663961 |
| H | 2.447632  | 1.482592  | -3.376644 |
| O | -2.423129 | -0.651992 | 3.874566  |
| H | -3.007443 | -0.763200 | 4.639560  |
| H | -2.904624 | -1.053388 | 3.098814  |
| O | 1.135807  | 2.128200  | 3.887623  |
| H | 1.372358  | 2.564340  | 4.720141  |
| H | 1.522331  | 1.206409  | 3.939920  |
| O | -3.675475 | -1.814725 | 1.829564  |
| H | -3.149896 | -2.546229 | 1.439713  |
| H | -3.969674 | -1.247012 | 1.085572  |
| O | 2.595466  | -3.577030 | 1.042322  |
| H | 2.992000  | -2.782264 | 1.462060  |
| H | 1.707618  | -3.701074 | 1.439519  |

**Table S15.** M06-2X/6-31+G\*/PCM optimized Cartesian coordinates of the (H<sub>2</sub>O)<sub>28</sub> hollow clathrate in the hexadecahedron 5<sup>12</sup>6<sup>4</sup>-D<sub>2</sub> configuration.

|   |           |           |           |
|---|-----------|-----------|-----------|
| O | 2.926258  | 3.417084  | 1.531378  |
| O | 0.268141  | 4.293089  | 1.489582  |
| O | -1.639644 | 2.980643  | 2.814444  |
| O | 3.419395  | 1.006619  | 2.860192  |
| O | 1.273131  | -0.588929 | 3.646280  |
| O | -1.195456 | 0.409444  | 3.809344  |
| O | 3.900703  | -2.983380 | 1.034299  |
| O | 4.981002  | -0.404007 | 1.239867  |
| O | -3.862812 | 2.987077  | 1.120861  |
| O | -4.952559 | 0.411710  | 1.337272  |
| O | -3.295734 | -1.164958 | 2.834708  |
| O | -3.021488 | 3.327170  | -1.456038 |
| O | -0.407623 | 4.287540  | -1.216090 |
| O | 1.516611  | 3.211039  | -2.716986 |
| O | -3.417375 | 1.046146  | -2.755953 |
| O | -1.277808 | -0.436754 | -3.769700 |
| O | 1.304195  | 0.621822  | -3.708040 |
| O | -4.998862 | -0.696875 | -1.240362 |
| O | 4.988337  | 0.695974  | -1.252821 |
| O | 3.798910  | 3.156478  | -1.063744 |
| O | 3.394762  | -0.864497 | -2.975523 |

|   |           |           |           |
|---|-----------|-----------|-----------|
| O | -1.551171 | -2.903883 | -2.784643 |
| O | -3.738245 | -3.118704 | -1.035003 |
| O | 1.717067  | -3.170433 | 2.661465  |
| O | -0.197780 | -4.281957 | 1.201340  |
| O | -2.827539 | -3.399161 | 1.511552  |
| O | 0.523922  | -4.227421 | -1.489293 |
| O | 2.992404  | -3.243957 | -1.597566 |
| H | -4.601776 | 1.322549  | 1.248427  |
| H | -4.999748 | 0.048983  | 0.428164  |
| H | -3.872180 | -0.563898 | 2.302812  |
| H | -2.525379 | -0.634010 | 3.129821  |
| H | -3.587518 | 3.155445  | 0.185940  |
| H | -4.489378 | 3.689545  | 1.351117  |
| H | -1.342055 | 0.468901  | 4.765707  |
| H | -0.275114 | 0.043129  | 3.703319  |
| H | -1.454847 | 2.066035  | 3.119585  |
| H | -2.433522 | 2.936179  | 2.240146  |
| H | -0.413760 | 3.783813  | 2.009216  |
| H | 0.248142  | 5.197060  | 1.838259  |
| H | 1.976770  | 3.656793  | 1.572053  |
| H | 3.031067  | 2.572058  | 2.018034  |
| H | 3.941183  | 1.203524  | 3.652818  |
| H | 4.021136  | 0.479930  | 2.258425  |
| H | 3.005883  | 3.186471  | -1.638560 |
| H | 3.470638  | 3.262060  | -0.139754 |
| H | 4.983108  | -0.019951 | 0.327395  |
| H | 4.627703  | -1.314427 | 1.156940  |
| H | 4.560656  | 1.585303  | -1.208056 |
| H | 4.438146  | 0.162105  | -1.863049 |
| H | 2.589624  | -0.338665 | -3.237343 |
| H | 3.873052  | -1.046172 | -3.798426 |
| H | 3.337182  | -3.114904 | -0.688362 |
| H | 3.101527  | -2.389249 | -2.069260 |
| H | 0.390720  | 0.267793  | -3.655608 |
| H | 1.295932  | 1.526028  | -3.325954 |
| H | 3.134801  | -3.086664 | 1.651714  |
| H | 4.528992  | -3.685496 | 1.260904  |
| H | 0.772301  | 3.595266  | -2.176077 |
| H | 1.656284  | 3.824957  | -3.453546 |
| H | 0.969876  | -3.574838 | 2.133683  |
| H | 1.864655  | -3.760053 | 3.416561  |
| H | -0.188164 | 4.281711  | -0.258712 |
| H | -1.308197 | 3.908552  | -1.301538 |
| H | -3.538402 | 3.989376  | -1.939711 |
| H | -3.139489 | 2.467672  | -1.952699 |
| H | -2.638265 | 0.544456  | -3.081452 |
| H | -3.961995 | 0.413513  | -2.240749 |
| H | -3.303589 | -4.088366 | 1.999654  |
| H | -2.970811 | -2.548127 | 2.023305  |
| H | -4.601174 | -1.599460 | -1.189357 |
| H | -5.888861 | -0.811521 | -1.606258 |
| H | -4.289762 | -3.884706 | -1.255921 |
| H | -3.436888 | -3.252962 | -0.100280 |
| H | -1.103696 | -3.919310 | 1.304029  |
| H | 0.018188  | -4.251506 | 0.243582  |
| H | -1.459085 | -0.536621 | -4.716927 |
| H | -1.343878 | -1.355306 | -3.387303 |
| H | 0.584933  | -5.131206 | -1.833735 |



|   |           |           |           |
|---|-----------|-----------|-----------|
| H | 1.443329  | -3.843201 | -1.557600 |
| H | -2.302992 | -2.986118 | -2.161260 |
| H | -0.782764 | -3.330088 | -2.346246 |
| H | 1.406495  | -1.481179 | 3.262205  |
| H | 2.015035  | -0.026550 | 3.333373  |

---

**Table S16.** M06-2X/6-31+G\*/PCM optimized Cartesian coordinates of the (H<sub>2</sub>O)<sub>30</sub> hollow clathrate in the heptadecahedron 5<sup>12</sup>6<sup>5</sup>-C<sub>2v</sub> A configuration.

|   |           |           |           |
|---|-----------|-----------|-----------|
| O | 4.854189  | 2.116422  | -0.555167 |
| O | 2.748829  | 3.718090  | -1.289993 |
| O | 4.853815  | -0.061765 | -2.179941 |
| O | -1.305386 | 2.447625  | -3.291700 |
| O | 1.338303  | 2.497004  | -3.396218 |
| O | 2.569277  | 0.095643  | -3.812127 |
| O | -2.617909 | 3.800263  | -1.222812 |
| O | 4.769148  | -2.225809 | -0.676092 |
| O | -1.452336 | -2.373036 | -3.394475 |
| O | 1.212262  | -2.301551 | -3.339565 |
| O | 2.619476  | -3.734964 | -1.386791 |
| O | -2.691004 | 0.122373  | -3.689809 |
| O | 4.368576  | -1.470104 | 1.986257  |
| O | 4.422731  | 1.304736  | 2.105574  |
| O | 2.295156  | 2.645623  | 2.983856  |
| O | 2.287056  | -2.780692 | 2.995310  |
| O | 0.092000  | -1.362993 | 3.959493  |
| O | 0.109762  | 1.304260  | 4.087948  |
| O | -1.374440 | -4.385285 | 0.975030  |
| O | 1.275582  | -4.410760 | 0.973471  |
| O | -2.796791 | -3.630395 | -1.306240 |
| O | -1.248616 | 4.475615  | 1.124082  |
| O | 1.400112  | 4.439559  | 1.046176  |
| O | -2.067645 | 2.747136  | 3.072727  |
| O | -2.164904 | -2.725421 | 2.995182  |
| O | -4.388622 | -1.289649 | 2.077773  |
| O | -4.335948 | 1.375263  | 2.186328  |
| O | -4.870963 | -2.170675 | -0.532262 |
| O | -4.988554 | 0.077955  | -2.067556 |
| O | -4.686126 | 2.316616  | -0.418576 |
| H | 1.644757  | -3.832618 | 1.676962  |
| H | 1.725825  | -4.157900 | 0.139043  |
| H | 2.935663  | -4.547421 | -1.810922 |
| H | 3.431193  | -3.222320 | -1.143541 |
| H | 3.058289  | -2.258323 | 2.634864  |
| H | 2.645230  | -3.324399 | 3.713186  |
| H | 1.657326  | -1.436022 | -3.459546 |
| H | 1.691306  | -2.774799 | -2.626656 |
| H | 0.878014  | -1.824490 | 3.595074  |
| H | -0.695818 | -1.810307 | 3.584842  |
| H | -0.458215 | -2.332840 | -3.342009 |
| H | -1.651299 | -2.884026 | -4.193686 |
| H | -1.887512 | -3.350565 | 2.279768  |
| H | -2.467048 | -3.282430 | 3.729058  |
| H | -2.208262 | -3.853367 | -0.553665 |

|   |           |           |           |
|---|-----------|-----------|-----------|
| H | -2.249245 | -3.187937 | -1.991052 |
| H | -0.374459 | -4.392177 | 0.941328  |
| H | -1.641155 | -5.300758 | 1.150378  |
| H | -4.099838 | -2.733651 | -0.832646 |
| H | -5.656664 | -2.736391 | -0.577454 |
| H | -3.591643 | -1.764296 | 2.397090  |
| H | -4.555150 | -1.612396 | 1.166047  |
| H | -2.229136 | -0.733561 | -3.564290 |
| H | -3.494962 | 0.084714  | -3.131138 |
| H | -5.806808 | 0.088014  | -2.586568 |
| H | -5.007533 | -0.754965 | -1.534347 |
| H | -4.333042 | 0.378196  | 2.168182  |
| H | -5.087617 | 1.630078  | 2.742302  |
| H | -4.812911 | 1.525828  | -0.985352 |
| H | -4.568452 | 1.983368  | 0.497970  |
| H | -2.816035 | 2.178623  | 2.794007  |
| H | -1.353771 | 2.157202  | 3.393775  |
| H | -2.988863 | 4.613570  | -1.597500 |
| H | -3.399804 | 3.252631  | -0.931638 |
| H | -1.739203 | 2.905590  | -2.540308 |
| H | -1.774248 | 1.587044  | -3.409438 |
| H | -1.698691 | 4.227316  | 0.288379  |
| H | -1.559540 | 3.836860  | 1.810898  |
| H | 0.129967  | 1.483914  | 5.040109  |
| H | 0.104268  | 0.312073  | 4.002267  |
| H | 1.522118  | 3.071985  | -4.154925 |
| H | 0.340918  | 2.454774  | -3.326493 |
| H | 1.947585  | 3.264632  | 2.304931  |
| H | 1.528225  | 2.139930  | 3.329526  |
| H | 2.187779  | 3.948893  | -0.519493 |
| H | 2.171976  | 3.285328  | -1.952759 |
| H | 1.688782  | 5.332999  | 1.286031  |
| H | 0.399901  | 4.464631  | 1.043131  |
| H | 4.700921  | 1.842817  | 0.373390  |
| H | 4.095933  | 2.698776  | -0.798703 |
| H | 3.613162  | 1.774352  | 2.451325  |
| H | 5.158780  | 1.595097  | 2.664880  |
| H | 2.089357  | 0.949140  | -3.667656 |
| H | 2.832150  | 0.094976  | -4.745130 |
| H | 4.852318  | 0.739516  | -1.597469 |
| H | 4.056796  | 0.007995  | -2.746660 |
| H | 4.515763  | -1.705063 | 1.044771  |
| H | 4.350006  | -0.489144 | 2.033091  |
| H | 5.617188  | -2.685166 | -0.771816 |
| H | 4.819180  | -1.412222 | -1.262796 |

**Table S17.** M06-2X/6-31+G\*/PCM optimized Cartesian coordinates of the (H<sub>2</sub>O)<sub>30</sub> hollow clathrate in the heptadecahedron 5<sup>12</sup>6<sup>5</sup>-D<sub>5h</sub> configuration.

|   |          |           |           |
|---|----------|-----------|-----------|
| O | 4.963279 | -2.110965 | 0.909093  |
| H | 5.755159 | -2.644836 | 1.076891  |
| H | 4.958456 | -1.914242 | -0.075687 |
| O | 2.664372 | -3.454814 | 1.570710  |
| H | 3.511420 | -2.999871 | 1.342552  |
| H | 2.917996 | -4.304167 | 1.963658  |

|   |           |           |           |
|---|-----------|-----------|-----------|
| O | -1.328951 | -1.991695 | 3.609101  |
| H | -1.535030 | -2.440365 | 4.443168  |
| H | -0.335290 | -1.967530 | 3.556809  |
| O | 1.344113  | -1.963573 | 3.544792  |
| H | 1.787547  | -1.090302 | 3.590317  |
| H | 1.789001  | -2.467916 | 2.831153  |
| O | 4.982489  | 0.251018  | 2.273686  |
| H | 5.793921  | 0.301535  | 2.801876  |
| H | 5.012469  | -0.618845 | 1.802069  |
| O | 2.678486  | 0.496086  | 3.746208  |
| H | 3.532093  | 0.410217  | 3.257479  |
| H | 2.917890  | 0.621803  | 4.677289  |
| O | 4.928333  | 2.302876  | 0.361944  |
| H | 4.116252  | 2.838547  | 0.501361  |
| H | 4.928683  | 1.605932  | 1.051513  |
| O | -1.342461 | 2.808222  | 2.975373  |
| H | -0.347744 | 2.785792  | 2.926680  |
| H | -1.555115 | 3.454305  | 3.665917  |
| O | 1.326650  | 2.811612  | 2.911047  |
| H | 1.791558  | 1.986919  | 3.165260  |
| H | 1.760114  | 3.145155  | 2.096007  |
| O | 2.622884  | 3.827016  | 0.665118  |
| H | 2.847967  | 4.757780  | 0.813871  |
| H | 2.118661  | 3.797760  | -0.195900 |
| O | -2.672364 | 0.464534  | 3.755656  |
| H | -2.128073 | -0.345586 | 3.664832  |
| H | -2.121657 | 1.220674  | 3.463711  |
| O | 4.915709  | 1.193431  | -2.046786 |
| H | 4.941118  | 1.629091  | -1.145930 |
| H | 5.713764  | 1.483075  | -2.514475 |
| O | -1.416479 | 3.689941  | -1.698822 |
| H | -1.661336 | 4.543684  | -2.087580 |
| H | -1.842395 | 3.675098  | -0.796614 |
| O | 1.361961  | 3.736435  | -1.675875 |
| H | 1.718542  | 3.038509  | -2.265158 |
| H | 0.383947  | 3.647193  | -1.668711 |
| O | 2.595878  | 1.847070  | -3.332865 |
| H | 3.458408  | 1.630895  | -2.899419 |
| H | 2.821607  | 2.294570  | -4.162831 |
| O | -2.646548 | 3.685052  | 0.667642  |
| H | -2.163512 | 3.345491  | 1.451892  |
| H | -3.489203 | 3.183018  | 0.610789  |
| O | 4.911448  | -1.568873 | -1.672572 |
| H | 4.101607  | -1.933695 | -2.093371 |
| H | 4.900334  | -0.599641 | -1.830153 |
| O | -1.397376 | -0.538639 | -4.033489 |
| H | -0.402182 | -0.532975 | -3.987605 |
| H | -1.614194 | -0.665575 | -4.969600 |
| O | 1.270994  | -0.533557 | -4.002624 |
| H | 1.723445  | -1.275345 | -3.546209 |
| H | 1.726644  | 0.290869  | -3.730547 |
| O | 2.616838  | -2.657157 | -2.803923 |
| H | 2.851128  | -3.312627 | -3.478174 |
| H | 2.123216  | -3.154308 | -2.093143 |
| O | -2.745603 | 1.800251  | -3.283866 |
| H | -2.205635 | 2.402524  | -2.729868 |
| H | -2.190584 | 1.020672  | -3.496239 |
| O | -1.391480 | -3.999093 | -0.771788 |

|   |           |           |           |
|---|-----------|-----------|-----------|
| H | -1.626217 | -4.920239 | -0.962218 |
| H | -1.836865 | -3.457455 | -1.481529 |
| O | 1.386090  | -3.995920 | -0.861781 |
| H | 1.755892  | -3.786391 | 0.021665  |
| H | 0.408463  | -3.927135 | -0.798448 |
| O | -2.705233 | -3.431841 | 1.639652  |
| H | -2.172295 | -3.584895 | 0.831383  |
| H | -2.145772 | -2.927706 | 2.267231  |
| O | -2.670792 | -2.603190 | -2.650165 |
| H | -3.506721 | -2.231064 | -2.292281 |
| H | -2.198177 | -1.867816 | -3.096671 |
| O | -5.036667 | -2.115866 | 1.025226  |
| H | -4.197864 | -2.577196 | 1.264623  |
| H | -5.032369 | -1.257290 | 1.515003  |
| O | -5.045195 | -1.639611 | -1.572531 |
| H | -5.065744 | -1.834458 | -0.588256 |
| H | -5.818484 | -2.079544 | -1.955997 |
| O | -5.052632 | 1.117364  | -1.979858 |
| H | -5.054325 | 0.143136  | -1.857761 |
| H | -4.217346 | 1.338457  | -2.458628 |
| O | -5.038411 | 2.295043  | 0.398891  |
| H | -5.808253 | 2.880652  | 0.452576  |
| H | -5.070287 | 1.866686  | -0.504815 |
| O | -5.029888 | 0.279691  | 2.348231  |
| H | -4.183211 | 0.368681  | 2.845461  |
| H | -5.036986 | 1.003517  | 1.687380  |

---

**Table S18.** M06-2X/6-31+G\*/PCM optimized Cartesian coordinates of the (H<sub>2</sub>O)<sub>30</sub> hollow clathrate in the heptadecahedron 5<sup>12</sup>6<sup>5</sup>-C<sub>2v</sub> B inverted\_inverted configuration.

|   |           |           |           |
|---|-----------|-----------|-----------|
| O | -0.865508 | -2.358188 | -3.494277 |
| H | -0.888484 | -2.351428 | -4.462653 |
| H | -0.495670 | -1.473524 | -3.209746 |
| O | -3.869959 | 2.125611  | 2.067314  |
| H | -4.091258 | 1.205533  | 1.809997  |
| H | -2.992689 | 2.101994  | 2.507222  |
| O | -1.275341 | -2.358351 | 3.450515  |
| H | -1.457188 | -2.432998 | 4.398980  |
| H | -2.143241 | -2.509887 | 2.979249  |
| O | 5.268565  | 0.490549  | 0.184023  |
| H | 4.927684  | 0.898844  | -0.645013 |
| H | 4.979213  | -0.450187 | 0.165589  |
| O | 2.539546  | -0.283891 | 3.561685  |
| H | 2.613688  | -0.284222 | 4.527680  |
| H | 2.796056  | -1.190793 | 3.261273  |
| O | 3.084213  | -2.757697 | 2.557929  |
| H | 3.662869  | -3.308307 | 3.106896  |
| H | 2.213911  | -3.244501 | 2.496376  |
| O | -4.594722 | -0.387648 | -1.524234 |
| H | -5.482852 | -0.438163 | -1.909896 |
| H | -4.213775 | 0.484253  | -1.833025 |
| O | -2.865973 | -4.297852 | -0.133449 |
| H | -3.439384 | -5.074898 | -0.216952 |
| H | -3.041912 | -3.731836 | -0.940410 |

|   |           |           |           |
|---|-----------|-----------|-----------|
| O | -0.217489 | -4.982084 | 0.020423  |
| H | -0.170478 | -5.950304 | 0.040212  |
| H | -1.180153 | -4.761409 | -0.037852 |
| O | 2.704081  | 3.842971  | -1.376819 |
| H | 3.215417  | 4.627139  | -1.628382 |
| H | 2.677388  | 3.846696  | -0.377615 |
| O | 2.848590  | -0.389510 | -3.386182 |
| H | 3.066280  | -1.286967 | -3.031588 |
| H | 2.952544  | -0.444216 | -4.347849 |
| O | 3.303013  | -2.839515 | -2.273230 |
| H | 3.936605  | -3.388842 | -2.759204 |
| H | 2.438416  | -3.340395 | -2.278867 |
| O | -1.364177 | 2.206327  | 3.297703  |
| H | -0.864316 | 1.362293  | 3.095469  |
| H | -1.448701 | 2.249278  | 4.262145  |
| O | 0.971611  | -4.122541 | -2.374203 |
| H | 0.300460  | -3.543584 | -2.797865 |
| H | 0.586233  | -4.404887 | -1.517492 |
| O | 0.029944  | 4.303500  | 2.233277  |
| H | 0.057675  | 5.017200  | 2.888285  |
| H | -0.461566 | 3.559348  | 2.660421  |
| O | -3.531843 | -2.778457 | 2.112201  |
| H | -3.324922 | -3.314591 | 1.316021  |
| H | -3.932386 | -1.943711 | 1.787127  |
| O | 4.295465  | 1.657306  | -2.124069 |
| H | 3.681091  | 2.386573  | -1.894919 |
| H | 3.767888  | 0.980024  | -2.594942 |
| O | -3.307219 | -2.766864 | -2.252963 |
| H | -3.694872 | -1.896637 | -2.018315 |
| H | -2.464716 | -2.586418 | -2.725600 |
| O | 4.037770  | 1.738530  | 2.281844  |
| H | 4.490363  | 1.281971  | 1.530388  |
| H | 3.520118  | 1.046480  | 2.740800  |
| O | 0.090315  | 4.297059  | -2.277264 |
| H | -0.415863 | 4.588049  | -1.479974 |
| H | 1.002680  | 4.106017  | -1.969200 |
| O | 0.741499  | -4.018122 | 2.474821  |
| H | 0.017274  | -3.460785 | 2.834187  |
| H | 0.434439  | -4.334456 | 1.598470  |
| O | 0.194378  | -0.113142 | -2.581253 |
| H | 1.127153  | -0.091672 | -2.883340 |
| H | -0.229732 | 0.720192  | -2.884010 |
| O | -0.070909 | 0.002601  | 2.633425  |
| H | -0.521401 | -0.815929 | 2.937207  |
| H | 0.847743  | -0.054052 | 2.974421  |
| O | 4.481712  | -2.164127 | 0.189532  |
| H | 3.923405  | -2.401820 | 0.958025  |
| H | 3.995561  | -2.436088 | -0.615757 |
| O | -3.677617 | 1.984535  | -2.293260 |
| H | -3.706934 | 2.609778  | -1.536006 |
| H | -2.770783 | 2.041371  | -2.666030 |
| O | -1.106211 | 2.197552  | -3.359514 |
| H | -1.134859 | 2.333747  | -4.318293 |
| H | -0.642503 | 2.997067  | -2.973293 |
| O | -4.723289 | -0.406014 | 1.208443  |
| H | -4.701105 | -0.395920 | 0.219171  |
| H | -5.661653 | -0.446690 | 1.449297  |
| O | 2.639055  | 3.854278  | 1.283144  |

|   |           |          |           |
|---|-----------|----------|-----------|
| H | 1.735125  | 3.911686 | 1.655550  |
| H | 3.081522  | 3.064588 | 1.681363  |
| O | -3.780008 | 3.684276 | -0.095553 |
| H | -4.554978 | 4.265640 | -0.087057 |
| H | -3.841871 | 3.118241 | 0.723938  |
| O | -1.352017 | 5.082862 | -0.088272 |
| H | -2.212038 | 4.611342 | -0.072807 |
| H | -0.886337 | 4.823132 | 0.734294  |

---

**Table S19.** M06-2X/6-31+G\*/PCM optimized Cartesian coordinates of the (H<sub>2</sub>O)<sub>30</sub> hollow clathrate in the heptadecahedron 5<sup>12</sup>6<sup>5</sup>-C<sub>2v</sub> B inverted configuration.

|   |           |           |           |
|---|-----------|-----------|-----------|
| O | 0.562760  | 2.448417  | -3.583011 |
| H | 0.579080  | 2.459128  | -4.551483 |
| H | 0.294760  | 1.524480  | -3.310345 |
| O | 4.066103  | -1.668443 | 1.962303  |
| H | 4.184324  | -0.730221 | 1.702307  |
| H | 3.217013  | -1.736129 | 2.449075  |
| O | 1.037771  | 2.601096  | 3.586942  |
| H | 1.242027  | 3.011774  | 4.440685  |
| H | 1.841401  | 2.746388  | 3.013087  |
| O | -5.168993 | -1.053603 | 0.185330  |
| H | -4.802624 | -1.427243 | -0.649107 |
| H | -4.990420 | -0.085851 | 0.153215  |
| O | -2.562082 | -0.027981 | 3.690647  |
| H | -2.943182 | -0.038631 | 4.582020  |
| H | -2.847142 | 0.829666  | 3.288053  |
| O | -3.301746 | 2.332450  | 2.525501  |
| H | -3.942196 | 2.809434  | 3.075071  |
| H | -2.500586 | 2.926259  | 2.459239  |
| O | 4.500916  | 0.888095  | -1.647356 |
| H | 5.374160  | 1.036329  | -2.041825 |
| H | 4.214351  | -0.020053 | -1.953800 |
| O | 2.364304  | 4.555384  | -0.207411 |
| H | 2.864837  | 5.382893  | -0.272937 |
| H | 2.595424  | 4.022230  | -1.022949 |
| O | -0.335083 | 4.953299  | -0.029798 |
| H | -0.495616 | 5.908956  | 0.002657  |
| H | 0.646109  | 4.847325  | -0.101865 |
| O | -2.287042 | -4.109752 | -1.424098 |
| H | -2.714451 | -4.946664 | -1.661946 |
| H | -2.241481 | -4.103373 | -0.425423 |
| O | -2.922138 | 0.075943  | -3.434393 |
| H | -3.229936 | 0.944903  | -3.075647 |
| H | -3.055068 | 0.115002  | -4.393272 |
| O | -3.620866 | 2.463302  | -2.311831 |
| H | -4.316265 | 2.942725  | -2.787176 |
| H | -2.815778 | 3.055013  | -2.324612 |
| O | 1.726548  | -2.114117 | 3.431285  |
| H | 1.148994  | -1.321876 | 3.618486  |
| H | 2.037314  | -2.418863 | 4.297756  |
| O | -1.442413 | 3.989416  | -2.422540 |
| H | -0.716552 | 3.492180  | -2.859548 |
| H | -1.081813 | 4.303549  | -1.566055 |

|   |           |           |           |
|---|-----------|-----------|-----------|
| O | 0.469433  | -4.213479 | 2.187912  |
| H | 0.506131  | -4.942116 | 2.826014  |
| H | 0.885015  | -3.439392 | 2.640207  |
| O | 3.145499  | 3.085967  | 2.035753  |
| H | 2.883646  | 3.603181  | 1.243581  |
| H | 3.648809  | 2.311368  | 1.705486  |
| O | -4.118876 | -2.111016 | -2.142415 |
| H | -3.426889 | -2.771329 | -1.925778 |
| H | -3.674407 | -1.382325 | -2.622163 |
| O | 2.952674  | 3.111873  | -2.351207 |
| H | 3.436674  | 2.288035  | -2.128173 |
| H | 2.132017  | 2.843569  | -2.820585 |
| O | -3.771055 | -2.149226 | 2.262661  |
| H | -4.281106 | -1.734449 | 1.523954  |
| H | -3.327545 | -1.415828 | 2.735280  |
| O | 0.351746  | -4.278642 | -2.344675 |
| H | 0.888940  | -4.503561 | -1.546288 |
| H | -0.575654 | -4.189062 | -2.035206 |
| O | -1.151006 | 3.887274  | 2.431589  |
| H | -0.366168 | 3.442998  | 2.821008  |
| H | -0.874694 | 4.228122  | 1.554210  |
| O | -0.236583 | 0.089687  | -2.690341 |
| H | -1.166284 | -0.033680 | -2.977104 |
| H | 0.271405  | -0.694080 | -2.996075 |
| O | 0.214169  | -0.018195 | 4.047645  |
| H | 0.527906  | 0.888761  | 3.841377  |
| H | -0.751095 | -0.032270 | 3.873541  |
| O | -4.678827 | 1.666802  | 0.169131  |
| H | -4.122807 | 1.938953  | 0.928043  |
| H | -4.237870 | 1.988292  | -0.643875 |
| O | 3.839902  | -1.570324 | -2.405899 |
| H | 3.942369  | -2.184194 | -1.645732 |
| H | 2.943983  | -1.730465 | -2.775067 |
| O | 1.303389  | -2.072893 | -3.459674 |
| H | 1.344150  | -2.217590 | -4.416786 |
| H | 0.932418  | -2.913823 | -3.061548 |
| O | 4.644159  | 0.921632  | 1.083876  |
| H | 4.617526  | 0.911579  | 0.094742  |
| H | 5.571503  | 1.075938  | 1.321055  |
| O | -2.170932 | -4.090922 | 1.232597  |
| H | -1.263089 | -4.037196 | 1.595707  |
| H | -2.698568 | -3.358553 | 1.637703  |
| O | 4.142653  | -3.230815 | -0.196682 |
| H | 4.978139  | -3.721128 | -0.184630 |
| H | 4.136998  | -2.661361 | 0.622668  |
| O | 1.880344  | -4.876019 | -0.154459 |
| H | 2.689261  | -4.321051 | -0.160069 |
| H | 1.404782  | -4.648338 | 0.671792  |

**Table S20.** M06-2X/6-31+G\*/PCM optimized Cartesian coordinates of the (H<sub>2</sub>O)<sub>30</sub> hollow clathrate in the heptadecahedron 5<sup>12</sup>6<sup>5</sup>-C<sub>2v</sub> B configuration.

|   |           |           |           |
|---|-----------|-----------|-----------|
| O | -1.276637 | -2.396818 | -3.713549 |
| H | -1.483771 | -2.764838 | -4.585869 |
| H | -0.754520 | -1.563902 | -3.884237 |

|   |           |           |           |
|---|-----------|-----------|-----------|
| O | -3.479646 | 2.701415  | 1.995496  |
| H | -3.846451 | 1.823038  | 1.759577  |
| H | -2.642871 | 2.551624  | 2.485184  |
| O | -1.663486 | -2.179073 | 3.702632  |
| H | -1.964607 | -2.508542 | 4.562903  |
| H | -2.479007 | -2.120450 | 3.130082  |
| O | 5.259749  | -0.325510 | 0.234262  |
| H | 4.988838  | 0.110046  | -0.606667 |
| H | 4.838986  | -1.215830 | 0.227421  |
| O | 2.499173  | -0.573392 | 3.765684  |
| H | 2.875866  | -0.649464 | 4.655823  |
| H | 2.546577  | -1.481855 | 3.376601  |
| O | 2.589804  | -3.061503 | 2.635802  |
| H | 3.090864  | -3.679163 | 3.190024  |
| H | 1.662071  | -3.429698 | 2.583034  |
| O | -4.582831 | 0.283046  | -1.555919 |
| H | -5.463851 | 0.348840  | -1.955295 |
| H | -4.073653 | 1.080125  | -1.883066 |
| O | -3.452680 | -3.768110 | -0.072494 |
| H | -4.152881 | -4.435110 | -0.138184 |
| H | -3.522813 | -3.204864 | -0.897177 |
| O | -0.947427 | -4.833281 | 0.109762  |
| H | -1.021786 | -5.799821 | 0.129353  |
| H | -1.874304 | -4.492313 | 0.045331  |
| O | 3.290957  | 3.352597  | -1.388043 |
| H | 3.900046  | 4.059135  | -1.650957 |
| H | 3.251033  | 3.383158  | -0.389424 |
| O | 2.848173  | -0.837942 | -3.553140 |
| H | 2.848039  | -1.708363 | -3.083089 |
| H | 3.290596  | -0.997888 | -4.400816 |
| O | 2.814169  | -3.227789 | -2.218626 |
| H | 3.358245  | -3.883415 | -2.681149 |
| H | 1.884263  | -3.593885 | -2.218632 |
| O | -1.103360 | 2.543535  | 3.464648  |
| H | -0.750487 | 1.632578  | 3.669792  |
| H | -1.321731 | 2.936568  | 4.323783  |
| O | 0.332779  | -4.173728 | -2.297141 |
| H | -0.261442 | -3.555210 | -2.776055 |
| H | -0.098106 | -4.372511 | -1.438692 |
| O | 0.656683  | 4.220300  | 2.192118  |
| H | 0.800158  | 4.951962  | 2.811507  |
| H | 0.054199  | 3.589289  | 2.656351  |
| O | -3.827971 | -2.124946 | 2.154653  |
| H | -3.710373 | -2.700002 | 1.367838  |
| H | -4.117837 | -1.250853 | 1.816421  |
| O | 4.486152  | 0.930993  | -2.101113 |
| H | 4.011691  | 1.762754  | -1.888612 |
| H | 3.863681  | 0.367151  | -2.604607 |
| O | -3.623511 | -2.247433 | -2.235190 |
| H | -3.883201 | -1.323520 | -2.030694 |
| H | -2.790479 | -2.211719 | -2.753909 |
| O | 4.221556  | 1.128880  | 2.302533  |
| H | 4.595090  | 0.585760  | 1.565312  |
| H | 3.603327  | 0.545410  | 2.787582  |
| O | 0.756303  | 4.039324  | -2.340835 |
| H | 0.305803  | 4.438448  | -1.557411 |
| H | 1.642968  | 3.754499  | -2.031119 |
| O | 0.110826  | -4.009144 | 2.570159  |



|   |           |           |           |
|---|-----------|-----------|-----------|
| H | -0.529565 | -3.370315 | 2.953266  |
| H | -0.244524 | -4.272891 | 1.694577  |
| O | 0.197277  | -0.237270 | -4.208785 |
| H | 1.127967  | -0.356089 | -3.923854 |
| H | -0.099461 | 0.649894  | -3.911034 |
| O | -0.183853 | 0.140329  | 4.127055  |
| H | -0.722862 | -0.656878 | 3.933246  |
| H | 0.751535  | -0.098387 | 3.952881  |
| O | 4.070941  | -2.818531 | 0.261371  |
| H | 3.468105  | -2.921044 | 1.026372  |
| H | 3.544274  | -2.980323 | -0.548328 |
| O | -3.302879 | 2.455141  | -2.372034 |
| H | -3.218257 | 3.090043  | -1.627212 |
| H | -2.410101 | 2.362610  | -2.770968 |
| O | -0.797101 | 2.291701  | -3.598568 |
| H | -0.931476 | 2.686373  | -4.473968 |
| H | -0.183144 | 2.916824  | -3.116395 |
| O | -4.725465 | 0.338093  | 1.173782  |
| H | -4.702523 | 0.323858  | 0.184542  |
| H | -5.659914 | 0.430823  | 1.414995  |
| O | 3.185519  | 3.418508  | 1.266845  |
| H | 2.292402  | 3.601123  | 1.624723  |
| H | 3.505190  | 2.576912  | 1.677235  |
| O | -3.142984 | 4.178563  | -0.197802 |
| H | -3.821060 | 4.870425  | -0.204019 |
| H | -3.288640 | 3.646322  | 0.633489  |
| O | -0.522287 | 5.148011  | -0.188821 |
| H | -1.453849 | 4.840844  | -0.176769 |
| H | -0.125810 | 4.834988  | 0.651035  |

**Table S21.** M06-2X/6-31+G\*/PCM optimized Cartesian coordinates of the (H<sub>2</sub>O)<sub>30</sub> hollow clathrate in the heptadecahedron 4<sup>1</sup>5<sup>10</sup>6<sup>6</sup>-C<sub>2v</sub> configuration.

|   |           |           |           |
|---|-----------|-----------|-----------|
| O | -1.380456 | 4.381248  | -1.058193 |
| H | -0.401108 | 4.362115  | -1.027327 |
| H | -1.694180 | 4.195568  | -0.147040 |
| O | -4.050183 | -0.533665 | 2.421717  |
| H | -4.088266 | -1.219421 | 1.719632  |
| H | -4.111605 | 0.338258  | 1.976300  |
| O | 4.015495  | -0.531085 | 2.649864  |
| H | 4.843392  | -0.617760 | 3.147015  |
| H | 4.062112  | -1.218316 | 1.922491  |
| O | 4.208723  | 1.975141  | 1.408407  |
| H | 3.418867  | 2.539054  | 1.542201  |
| H | 4.047614  | 1.125905  | 1.870403  |
| O | 1.936767  | -0.855337 | 4.385892  |
| H | 2.681988  | -0.753068 | 3.743207  |
| H | 2.347660  | -1.001711 | 5.251276  |
| O | 1.493192  | -3.767459 | -2.530652 |
| H | 1.814725  | -4.526884 | -3.039734 |
| H | 1.978826  | -2.982396 | -2.881592 |
| O | 2.195458  | -4.075524 | 0.175439  |
| H | 1.892707  | -3.981504 | -0.751470 |
| H | 1.391381  | -4.098783 | 0.736293  |
| O | -4.338602 | 1.978212  | 1.218390  |

|   |           |           |           |
|---|-----------|-----------|-----------|
| H | -5.168149 | 2.337910  | 1.568622  |
| H | -4.489992 | 1.842626  | 0.235222  |
| O | -0.055812 | 3.355204  | 3.024809  |
| H | -0.886929 | 3.433072  | 2.511809  |
| H | -0.095340 | 2.505456  | 3.525642  |
| O | -0.083458 | -4.285915 | 1.788206  |
| H | -0.078261 | -5.181583 | 2.158396  |
| H | -0.103617 | -3.669705 | 2.571002  |
| O | 4.813361  | -1.009142 | -1.708980 |
| H | 4.828631  | -0.020130 | -1.538184 |
| H | 5.704597  | -1.250452 | -2.003797 |
| O | -2.360198 | 3.837937  | 1.501200  |
| H | -2.789715 | 4.629979  | 1.858752  |
| H | -3.072073 | 3.153860  | 1.430020  |
| O | -2.249552 | -4.158961 | 0.022312  |
| H | -1.496723 | -4.148564 | 0.650912  |
| H | -1.874568 | -3.998981 | -0.877306 |
| O | 2.127670  | 3.844608  | 1.615321  |
| H | 2.529424  | 4.614044  | 2.047270  |
| H | 1.306866  | 3.630425  | 2.148312  |
| O | -4.265958 | -2.492280 | 0.462221  |
| H | -5.035718 | -3.049662 | 0.651247  |
| H | -3.495222 | -3.117431 | 0.339407  |
| O | -2.160213 | -0.816039 | 4.271393  |
| H | -2.853827 | -0.706563 | 3.562960  |
| H | -2.641294 | -0.946826 | 5.102021  |
| O | 1.427540  | 4.461262  | -0.941261 |
| H | 1.668191  | 5.390283  | -1.081322 |
| H | 1.699154  | 4.249089  | -0.011440 |
| O | -0.108313 | 1.070512  | 4.518302  |
| H | -0.887025 | 0.483802  | 4.415206  |
| H | 0.671653  | 0.482447  | 4.449294  |
| O | -0.127358 | -2.688175 | 3.926315  |
| H | 0.659079  | -2.113870 | 4.039485  |
| H | -0.903329 | -2.092366 | 4.006417  |
| O | 4.218571  | -2.311000 | 0.701469  |
| H | 4.408103  | -1.871070 | -0.154417 |
| H | 3.458702  | -2.921187 | 0.542989  |
| O | -1.310687 | -3.743001 | -2.511198 |
| H | -1.688627 | -2.947088 | -2.941874 |
| H | -0.336041 | -3.671478 | -2.573104 |
| O | 4.796147  | 1.585103  | -1.226840 |
| H | 4.572134  | 1.740777  | -0.276474 |
| H | 4.098555  | 2.033119  | -1.750309 |
| O | -4.701655 | -1.072493 | -1.914947 |
| H | -4.528770 | -1.589367 | -1.099351 |
| H | -3.977873 | -1.288965 | -2.541102 |
| O | -4.710373 | 1.600683  | -1.369074 |
| H | -4.696062 | 0.634877  | -1.581325 |
| H | -3.990296 | 2.013584  | -1.893139 |
| O | -2.651700 | 2.820724  | -2.812833 |
| H | -3.021437 | 3.418161  | -3.480192 |
| H | -2.137461 | 3.396869  | -2.183019 |
| O | -2.616510 | -1.584664 | -3.706656 |
| H | -2.122805 | -0.730453 | -3.861235 |
| H | -2.957772 | -1.856712 | -4.571721 |
| O | 2.865339  | -1.600185 | -3.503507 |
| H | 3.611273  | -1.392047 | -2.884631 |

|   |           |           |           |
|---|-----------|-----------|-----------|
| H | 3.275846  | -1.815679 | -4.355149 |
| O | 2.775846  | 2.851557  | -2.711510 |
| H | 2.272981  | 3.442389  | -2.100572 |
| H | 3.153383  | 3.429873  | -3.391530 |
| O | -1.363689 | 0.721796  | -4.135965 |
| H | -1.741938 | 1.472196  | -3.630639 |
| H | -0.386728 | 0.743806  | -4.009183 |
| O | 1.367681  | 0.755803  | -3.941993 |
| H | 1.832167  | 1.484771  | -3.481642 |
| H | 1.866145  | -0.063212 | -3.745158 |

---

**Table S22.** M06-2X/6-31+G\*/PCM optimized Cartesian coordinates of the (H<sub>2</sub>O)<sub>32</sub> hollow clathrate in the octadecahedron 5<sup>12</sup>6<sup>6</sup>-D<sub>3</sub> configuration.

|   |           |           |           |
|---|-----------|-----------|-----------|
| O | 5.570445  | -0.036995 | -0.012477 |
| H | 6.539282  | -0.060774 | -0.011936 |
| H | 5.271522  | -0.950435 | -0.247656 |
| O | 4.560220  | 0.736145  | 2.475820  |
| H | 4.010832  | 1.541839  | 2.372420  |
| H | 4.902708  | 0.506862  | 1.585582  |
| O | 3.244615  | 3.722459  | -0.526612 |
| H | 3.157496  | 3.517667  | 0.427608  |
| H | 2.348620  | 3.962786  | -0.841184 |
| O | 4.578319  | 1.776757  | -1.906825 |
| H | 4.070023  | 2.465564  | -1.414723 |
| H | 4.932510  | 1.159190  | -1.232960 |
| O | -0.565783 | 1.247402  | 4.276973  |
| H | -1.490155 | 1.024477  | 4.035141  |
| H | -0.067749 | 0.395966  | 4.321740  |
| O | 0.547648  | 3.351886  | 3.131202  |
| H | 0.536632  | 4.017140  | 3.836434  |
| H | 0.129824  | 2.532723  | 3.527592  |
| O | 3.117357  | 3.120867  | 2.219329  |
| H | 2.193727  | 3.157546  | 2.570880  |
| H | 3.610000  | 3.800077  | 2.704905  |
| O | 3.226564  | 0.414558  | -3.740156 |
| H | 3.713031  | 0.952165  | -3.051352 |
| H | 3.730546  | 0.515793  | -4.561730 |
| O | 0.695756  | 4.543035  | -1.360912 |
| H | 0.762901  | 5.454013  | -1.685254 |
| H | 0.241116  | 4.033545  | -2.076499 |
| O | -0.641344 | 3.175212  | -3.315791 |
| H | -0.178980 | 2.354757  | -3.656014 |
| H | -0.747741 | 3.753530  | -4.086699 |
| O | 0.569561  | 1.050143  | -4.315975 |
| H | 0.090116  | 0.187541  | -4.304649 |
| H | 1.497220  | 0.861370  | -4.058637 |
| O | -0.804696 | 4.551237  | 0.999260  |
| H | -0.337697 | 4.069636  | 1.715255  |
| H | -0.234902 | 4.512592  | 0.201864  |
| O | 3.309736  | -2.257641 | -2.964217 |
| H | 2.407523  | -2.640860 | -2.994421 |
| H | 3.234333  | -1.318513 | -3.243602 |
| O | 4.624120  | -2.509740 | -0.673048 |

|   |           |           |           |
|---|-----------|-----------|-----------|
| H | 4.112868  | -2.434911 | -1.529201 |
| H | 5.332429  | -3.150751 | -0.837266 |
| O | 3.139055  | -3.365212 | 1.550572  |
| H | 3.240569  | -2.664983 | 2.229911  |
| H | 3.621434  | -3.054181 | 0.756523  |
| O | 0.779950  | -3.420667 | -3.210421 |
| H | 0.864144  | -4.151313 | -3.841819 |
| H | 0.334936  | -3.802535 | -2.413874 |
| O | -0.562523 | -4.478731 | -1.076720 |
| H | -0.646129 | -5.436535 | -1.201957 |
| H | -0.132353 | -4.360684 | -0.180032 |
| O | 0.574034  | -4.278123 | 1.299337  |
| H | 0.059824  | -3.874803 | 2.031118  |
| H | 1.489823  | -3.914687 | 1.359391  |
| O | -0.721901 | -1.359842 | -4.393609 |
| H | -1.635985 | -1.407591 | -4.044401 |
| H | -0.224729 | -2.083478 | -3.958533 |
| O | 0.765578  | -1.128350 | 4.510352  |
| H | 0.255438  | -1.877132 | 4.134764  |
| H | 1.672569  | -1.195738 | 4.143804  |
| O | 3.370262  | -1.403072 | 3.535543  |
| H | 3.797629  | -0.583283 | 3.162271  |
| H | 3.948198  | -1.704536 | 4.252438  |
| O | -3.225930 | -2.167168 | 3.163146  |
| H | -3.236298 | -1.200350 | 3.336137  |
| H | -3.654870 | -2.305125 | 2.290927  |
| O | -0.798626 | -3.211777 | 3.481610  |
| H | -1.711976 | -2.837474 | 3.334227  |
| H | -0.899633 | -3.906342 | 4.149712  |
| O | -4.532239 | -2.578215 | 0.740474  |
| H | -5.267065 | -3.196488 | 0.869787  |
| H | -3.994311 | -2.942509 | -0.015709 |
| O | -3.165716 | -3.494221 | -1.358407 |
| H | -3.175287 | -2.838113 | -2.087373 |
| H | -2.234912 | -3.778382 | -1.234569 |
| O | -5.501372 | -0.040746 | 0.045655  |
| H | -5.161711 | -0.934497 | 0.264444  |
| H | -5.196574 | 0.155849  | -0.864944 |
| O | -4.615093 | 0.618432  | -2.536621 |
| H | -4.060426 | 1.446447  | -2.463342 |
| H | -5.369682 | 0.850128  | -3.099102 |
| O | -3.343511 | -1.624826 | -3.434424 |
| H | -3.791837 | -0.795378 | -3.135805 |
| H | -3.897547 | -1.987248 | -4.142372 |
| O | -3.222393 | 2.864190  | -2.283836 |
| H | -3.205532 | 3.194170  | -1.358883 |
| H | -2.302576 | 2.911599  | -2.621848 |
| O | -3.218841 | 0.563831  | 3.738866  |
| H | -3.702423 | 1.063187  | 3.019668  |
| H | -3.726987 | 0.709171  | 4.551193  |
| O | -4.565004 | 1.814206  | 1.825752  |
| H | -4.892582 | 1.158050  | 1.163808  |
| H | -4.073075 | 2.497877  | 1.322957  |
| O | -3.274616 | 3.799392  | 0.342786  |
| H | -3.810110 | 4.606146  | 0.382901  |
| H | -2.357057 | 4.064788  | 0.629933  |

---

**Table S23.** M06-2X/6-31+G\*/PCM optimized Cartesian coordinates of the (H<sub>2</sub>O)<sub>32</sub> hollow clathrate in the octadecahedron 5<sup>12</sup>6<sup>6</sup>-C<sub>2</sub> A configuration.

|   |           |           |           |
|---|-----------|-----------|-----------|
| O | -5.227663 | -2.334339 | -0.189554 |
| O | -3.086676 | -3.456374 | -1.590235 |
| O | -4.459652 | -2.065708 | 2.351415  |
| O | 1.279860  | -4.511813 | -0.397196 |
| O | -1.278319 | -4.349744 | 0.246457  |
| O | -1.994420 | -3.327816 | 2.759720  |
| O | 1.996653  | -3.383275 | -2.774941 |
| O | -4.168438 | 0.658309  | 2.915663  |
| O | -4.989882 | 2.096182  | 0.749384  |
| O | -3.312590 | 3.810414  | -0.357529 |
| O | -1.551095 | 0.947995  | 3.865347  |
| O | -0.175487 | 3.142669  | 3.227899  |
| O | -1.024079 | 4.531610  | 0.950305  |
| O | 2.574792  | 2.872369  | 2.888678  |
| O | 2.197115  | -1.795385 | 3.515721  |
| O | -0.372209 | -1.578362 | 4.084102  |
| O | 3.746389  | 0.521196  | 3.336748  |
| O | 3.040759  | -3.491028 | 1.543889  |
| O | 0.186679  | 3.111699  | -3.103777 |
| O | -2.583734 | 2.938249  | -2.908802 |
| O | 1.597040  | 1.027244  | -3.983077 |
| O | 1.086695  | 4.606427  | -0.913025 |
| O | -5.562495 | 0.224113  | -1.265047 |
| O | -3.802363 | 0.618749  | -3.319763 |
| O | 0.343439  | -1.464167 | -3.959461 |
| O | -2.294399 | -1.714647 | -3.639396 |
| O | 3.383008  | 3.842581  | 0.378194  |
| O | 4.991928  | 1.986845  | -0.790940 |
| O | 4.140357  | 0.632225  | -2.888859 |
| O | 5.531214  | 0.125565  | 1.227655  |
| O | 5.222823  | -2.330582 | 0.240086  |
| O | 4.441864  | -2.042977 | -2.423214 |
| H | -5.385302 | 0.868051  | -0.547362 |
| H | -5.467897 | -0.666965 | -0.865730 |
| H | -4.964091 | -2.261801 | 0.769759  |
| H | -6.032912 | -2.872482 | -0.213608 |
| H | -5.785103 | 2.608560  | 0.960746  |
| H | -4.334392 | 2.748733  | 0.362548  |
| H | -3.855961 | -3.045991 | -1.141028 |
| H | -2.789584 | -2.822355 | -2.276702 |
| H | -4.427371 | 0.442586  | -2.575070 |
| H | -3.234498 | -0.176456 | -3.406281 |
| H | -2.585146 | -2.117074 | -4.471743 |
| H | -1.309010 | -1.600283 | -3.726367 |
| H | -3.009663 | 2.049070  | -3.078069 |
| H | -2.954686 | 3.540910  | -3.570924 |
| H | -3.036288 | 3.505940  | -1.249001 |
| H | -2.485582 | 4.030645  | 0.134951  |
| H | -1.908270 | -3.983703 | -0.420647 |
| H | -1.494756 | -3.933803 | 1.106599  |
| H | -2.109846 | -4.089635 | 3.347987  |
| H | -1.370785 | -2.717584 | 3.226438  |
| H | -4.754532 | 0.915567  | 3.643746  |

|   |           |           |           |
|---|-----------|-----------|-----------|
| H | -4.441163 | 1.209987  | 2.140523  |
| H | -4.346345 | -1.113573 | 2.559978  |
| H | -3.589047 | -2.490411 | 2.508355  |
| H | -2.442033 | 0.833836  | 3.472830  |
| H | -1.120769 | 0.066632  | 3.875725  |
| H | -0.413825 | -1.782206 | 5.031099  |
| H | 0.596102  | -1.644306 | 3.835662  |
| H | -0.676467 | 2.307345  | 3.435440  |
| H | -0.306924 | 3.724257  | 3.991990  |
| H | 0.311900  | -4.420102 | -0.158823 |
| H | 1.455457  | -5.464834 | -0.423580 |
| H | -0.263778 | 4.547129  | 0.332791  |
| H | -0.740580 | 4.007094  | 1.728742  |
| H | 2.089599  | -4.109114 | -3.410454 |
| H | 1.696735  | -3.799203 | -1.928664 |
| H | 1.226266  | 5.516790  | -1.215296 |
| H | 1.936510  | 4.326451  | -0.495878 |
| H | -0.784602 | 3.007229  | -3.004331 |
| H | 0.507049  | 3.593111  | -2.312367 |
| H | 0.774277  | -0.583977 | -3.906983 |
| H | 0.918712  | -2.101700 | -3.486772 |
| H | 1.747935  | 1.235874  | -4.917563 |
| H | 1.062637  | 1.786849  | -3.621759 |
| H | 4.216726  | -0.340548 | -2.731071 |
| H | 3.230431  | 0.795389  | -3.217216 |
| H | 3.599170  | -2.532148 | -2.528422 |
| H | 4.723782  | -2.179120 | -1.493293 |
| H | 4.633473  | 1.496717  | -1.589526 |
| H | 5.823973  | 2.392999  | -1.078577 |
| H | 3.951922  | 4.611421  | 0.537788  |
| H | 3.951436  | 3.175336  | -0.083736 |
| H | 6.052108  | -2.816813 | 0.359743  |
| H | 5.370477  | -1.419678 | 0.620275  |
| H | 5.328953  | 0.794001  | 0.538027  |
| H | 4.901081  | 0.283086  | 1.964465  |
| H | 3.804932  | -3.113118 | 1.058617  |
| H | 2.403911  | -3.800061 | 0.866313  |
| H | 1.598412  | 2.928124  | 2.976739  |
| H | 2.803428  | 3.207866  | 1.996721  |
| H | 3.273064  | 1.387286  | 3.193321  |
| H | 4.239984  | 0.619870  | 4.164883  |
| H | 2.468086  | -2.389054 | 2.774866  |
| H | 2.705758  | -0.962453 | 3.417590  |

**Table S24.** M06-2X/6-31+G\*/PCM optimized Cartesian coordinates of the (H<sub>2</sub>O)<sub>32</sub> hollow clathrate in the octadecahedron 5<sup>12</sup>6<sup>6</sup>-C<sub>2</sub> B configuration.

|   |          |          |           |
|---|----------|----------|-----------|
| O | 1.083937 | 4.227021 | -2.360888 |
| H | 0.742427 | 4.557294 | -1.493031 |
| H | 1.081749 | 4.991148 | -2.957212 |
| O | 3.693601 | 3.226065 | -2.041715 |
| H | 2.789588 | 3.593571 | -2.129661 |
| H | 3.888148 | 3.196196 | -1.080443 |
| O | 0.265314 | 5.101986 | 0.085478  |

|   |           |           |           |
|---|-----------|-----------|-----------|
| H | 0.309799  | 6.067918  | 0.152219  |
| H | -0.666465 | 4.848314  | 0.345783  |
| O | -2.183710 | 4.435030  | 0.848256  |
| H | -2.175411 | 3.882730  | 1.661049  |
| H | -2.745198 | 3.970033  | 0.192281  |
| O | -3.904493 | 3.200490  | -0.977595 |
| H | -4.513320 | 3.871393  | -1.322242 |
| H | -3.518793 | 2.751824  | -1.769706 |
| O | 4.288511  | 3.060134  | 0.685110  |
| H | 5.043959  | 3.621777  | 0.914453  |
| H | 4.567109  | 2.123710  | 0.887237  |
| O | 5.050526  | 0.550660  | 1.151744  |
| H | 4.539832  | 0.060337  | 1.830011  |
| H | 5.020435  | 0.019134  | 0.326160  |
| O | 3.745882  | -0.884828 | 3.168429  |
| H | 2.878223  | -0.565136 | 3.519764  |
| H | 4.343879  | -0.919808 | 3.930504  |
| O | 1.995190  | 3.974769  | 1.993102  |
| H | 1.423843  | 4.359741  | 1.296193  |
| H | 2.788156  | 3.618137  | 1.539366  |
| O | 0.583363  | 2.361704  | 3.692780  |
| H | -0.364270 | 2.521263  | 3.495082  |
| H | 1.103832  | 2.905600  | 3.054215  |
| O | 1.319826  | -0.129769 | 4.176998  |
| H | 1.036066  | 0.804144  | 3.953139  |
| H | 1.381713  | -0.157544 | 5.144282  |
| O | 3.458643  | -3.438556 | 2.024486  |
| H | 2.531103  | -3.724542 | 2.168869  |
| H | 3.541624  | -2.556227 | 2.442331  |
| O | 0.812873  | -4.276919 | 2.349172  |
| H | 0.480694  | -4.575630 | 1.453874  |
| H | 0.766081  | -5.053629 | 2.926674  |
| O | 0.009435  | -5.080936 | -0.046195 |
| H | -0.888046 | -4.770869 | -0.316327 |
| H | 0.631808  | -4.772949 | -0.740057 |
| O | -0.508288 | -2.162750 | 3.576175  |
| H | 0.131469  | -1.431940 | 3.711396  |
| H | -0.041865 | -2.881472 | 3.096592  |
| O | 3.965709  | -3.361342 | -0.664483 |
| H | 4.297429  | -2.466900 | -0.893575 |
| H | 3.795806  | -3.360240 | 0.308621  |
| O | 5.028015  | -0.850180 | -1.254001 |
| H | 4.574412  | -0.293163 | -1.949723 |
| H | 5.939398  | -0.970617 | -1.560534 |
| O | 3.875160  | 0.700461  | -3.073556 |
| H | 2.990170  | 0.428775  | -3.397496 |
| H | 3.776823  | 1.615539  | -2.714219 |
| O | 1.824017  | -4.203315 | -1.982032 |
| H | 2.124977  | -4.951859 | -2.518843 |
| H | 2.635864  | -3.859314 | -1.509495 |
| O | 0.459055  | -2.433636 | -3.645483 |
| H | -0.497953 | -2.540130 | -3.456429 |
| H | 0.943830  | -3.022190 | -3.027180 |
| O | 1.374030  | 0.021421  | -4.135102 |
| H | 1.028336  | -0.885959 | -3.910231 |
| H | 1.497133  | 0.021117  | -5.096576 |
| O | -3.911286 | -0.731315 | -3.001602 |
| H | -3.526017 | 0.170660  | -3.014036 |

|   |           |           |           |
|---|-----------|-----------|-----------|
| H | -4.426235 | -0.813795 | -2.171099 |
| O | -2.924810 | 1.883417  | -3.167808 |
| H | -3.330980 | 2.250521  | -3.968067 |
| H | -1.939584 | 1.968030  | -3.304093 |
| O | -0.324968 | 2.171625  | -3.624030 |
| H | 0.172857  | 2.855548  | -3.128340 |
| H | 0.267466  | 1.397276  | -3.738007 |
| O | -2.268305 | -2.820691 | -3.217897 |
| H | -2.850376 | -2.013088 | -3.162000 |
| H | -2.612823 | -3.347000 | -3.955110 |
| O | -5.399180 | -1.091941 | -0.659509 |
| H | -6.300229 | -1.392893 | -0.850810 |
| H | -4.997500 | -1.776056 | -0.071366 |
| O | -4.172851 | -2.935338 | 0.961762  |
| H | -3.753156 | -2.502987 | 1.747658  |
| H | -4.790417 | -3.592483 | 1.317879  |
| O | -2.482383 | -4.290433 | -0.845468 |
| H | -2.437659 | -3.750922 | -1.663596 |
| H | -3.021807 | -3.784140 | -0.204839 |
| O | -2.101746 | 2.945835  | 3.200139  |
| H | -2.415903 | 3.503376  | 3.928000  |
| H | -2.746833 | 2.184262  | 3.140792  |
| O | -3.887269 | 0.994862  | 2.987226  |
| H | -4.384417 | 1.103938  | 2.140540  |
| H | -3.554633 | 0.073280  | 3.004191  |
| O | -3.084192 | -1.695290 | 3.133553  |
| H | -3.510468 | -2.034085 | 3.935842  |
| H | -2.107046 | -1.852868 | 3.261856  |
| O | -5.278163 | 1.376176  | 0.663603  |
| H | -4.806572 | 1.996926  | 0.069738  |
| H | -5.353616 | 0.531578  | 0.172576  |

**Table S25.** M06-2X/6-31+G\*/PCM optimized Cartesian coordinates of the (H<sub>2</sub>O)<sub>32</sub> hollow clathrate in the octadecahedron 5<sup>12</sup>6<sup>6</sup>-D<sub>2</sub> configuration.

|   |           |           |           |
|---|-----------|-----------|-----------|
| O | 2.393282  | 4.099785  | 0.880261  |
| O | -2.340186 | 3.949268  | -1.297542 |
| O | -0.201339 | 3.257013  | -2.974075 |
| O | 2.205154  | 3.504272  | -1.847491 |
| O | 4.555136  | 2.556647  | 1.799285  |
| O | 5.729926  | 1.256306  | -0.295789 |
| O | 4.185451  | 1.689651  | -2.584403 |
| O | 3.553721  | 0.614653  | 3.546441  |
| O | 0.876239  | 1.258307  | 3.954106  |
| O | -0.858315 | -0.751880 | 4.197256  |
| O | 4.186258  | -1.753685 | 2.498804  |
| O | 2.182068  | -3.596774 | 1.898059  |
| O | -0.263955 | -3.118146 | 2.853064  |
| O | 5.754312  | -1.331500 | 0.226742  |
| O | -3.515224 | -0.188974 | 3.563057  |
| O | -4.509128 | -2.386771 | 2.133905  |
| O | -2.429886 | -3.953836 | 1.269163  |
| O | -4.132172 | 2.108780  | 2.351531  |
| O | -2.094612 | 3.776804  | 1.420208  |
| O | 0.288920  | 3.603709  | 2.542565  |



|   |           |           |           |
|---|-----------|-----------|-----------|
| O | -5.703148 | 1.483720  | 0.113097  |
| O | -5.737842 | -1.244613 | -0.118345 |
| O | -4.559131 | 2.448699  | -2.079865 |
| O | -3.480130 | 0.341621  | -3.560235 |
| O | 0.124498  | -3.453844 | -2.443358 |
| O | -2.283756 | -3.842271 | -1.458341 |
| O | -4.206577 | -2.081703 | -2.328058 |
| O | 2.280079  | -4.005656 | -0.866137 |
| O | 4.543040  | -2.644915 | -1.828763 |
| O | -0.853083 | 0.810517  | -4.155426 |
| O | 0.788004  | -1.271537 | -4.054918 |
| O | 3.462216  | -0.699287 | -3.518465 |
| H | -5.158787 | 1.700065  | 0.900177  |
| H | -5.717238 | 0.498305  | 0.048633  |
| H | -5.015850 | 2.107095  | -1.257908 |
| H | -5.221225 | 2.959033  | -2.569397 |
| H | -3.886173 | 1.062014  | -3.031746 |
| H | -3.699775 | -0.497139 | -3.105231 |
| H | -3.110568 | 3.427991  | -1.610002 |
| H | -1.579093 | 3.681481  | -1.854642 |
| H | -2.524438 | -4.716588 | -1.802664 |
| H | -1.363682 | -3.656228 | -1.814921 |
| H | -2.551322 | -4.892631 | 1.479376  |
| H | -2.340419 | -3.906769 | 0.284577  |
| H | -2.778429 | 3.146460  | 1.732212  |
| H | -2.153536 | 3.804238  | 0.434876  |
| H | -4.652342 | 2.608359  | 2.998630  |
| H | -3.869652 | 1.262082  | 2.807664  |
| H | -5.111753 | -2.926677 | 2.667326  |
| H | -3.786104 | -2.991107 | 1.839081  |
| H | -2.567829 | -0.357217 | 3.757787  |
| H | -3.841616 | -0.970620 | 3.069127  |
| H | -3.490142 | -2.698021 | -2.040858 |
| H | -4.756221 | -2.585399 | -2.947377 |
| H | -5.330209 | -1.667651 | 0.666064  |
| H | -5.204850 | -1.535895 | -0.887439 |
| H | -1.790834 | 0.626217  | -3.908367 |
| H | -0.597182 | 1.641310  | -3.700756 |
| H | 0.691242  | 3.320233  | -2.536570 |
| H | -0.189925 | 3.913375  | -3.687088 |
| H | 0.321909  | -2.646078 | -2.963779 |
| H | 0.894733  | -3.611150 | -1.845109 |
| H | 0.174854  | -0.482288 | -4.052932 |
| H | 0.776256  | -1.607364 | -4.964188 |
| H | 2.506637  | -0.876765 | -3.659498 |
| H | 3.804053  | -1.411864 | -2.937330 |
| H | 5.033474  | -2.195197 | -1.096237 |
| H | 5.188353  | -3.207409 | -2.282690 |
| H | 4.718618  | 2.094734  | -3.284950 |
| H | 3.878271  | 0.811871  | -2.945581 |
| H | 2.217363  | -3.837409 | 0.098184  |
| H | 3.087162  | -3.544251 | -1.175032 |
| H | 2.251507  | 3.655851  | -0.880190 |
| H | 2.880614  | 2.828484  | -2.071564 |
| H | 1.271636  | -3.384562 | 2.241637  |
| H | 2.435823  | -4.428464 | 2.326406  |
| H | 1.601497  | 3.936720  | 1.451308  |
| H | 2.585354  | 5.046716  | 0.956110  |

|   |           |           |           |
|---|-----------|-----------|-----------|
| H | -0.467019 | -2.256061 | 3.276340  |
| H | -1.012091 | -3.336659 | 2.260346  |
| H | -0.609625 | 3.637361  | 2.100310  |
| H | 0.272256  | 4.296915  | 3.220347  |
| H | -0.833777 | -0.955559 | 5.144627  |
| H | -0.215513 | -0.001418 | 4.067015  |
| H | 1.807945  | 1.016984  | 3.760934  |
| H | 0.659576  | 2.042157  | 3.406113  |
| H | 4.007234  | 0.652761  | 4.402001  |
| H | 3.757677  | -0.284969 | 3.166706  |
| H | 4.192799  | 1.893411  | 2.424915  |
| H | 3.793620  | 3.097967  | 1.502687  |
| H | 3.452448  | -2.367013 | 2.277255  |
| H | 4.717534  | -1.638079 | 1.681820  |
| H | 5.188384  | 1.427751  | -1.096368 |
| H | 5.295360  | 1.744228  | 0.446418  |
| H | 6.672095  | -1.595308 | 0.392234  |
| H | 5.772374  | -0.347236 | 0.030506  |

---

**Table S26.** M06-2X/6-31+G\*/PCM optimized Cartesian coordinates of the (H<sub>2</sub>O)<sub>32</sub> hollow clathrate in the octadecahedron 5<sup>12</sup>6<sup>6</sup>-D<sub>3d</sub> configuration.

|   |           |           |           |
|---|-----------|-----------|-----------|
| O | -1.213985 | -4.186864 | -0.721795 |
| H | -2.056060 | -3.852771 | -1.114839 |
| H | -1.288395 | -5.153610 | -0.739583 |
| O | 1.177140  | -3.705732 | -2.149764 |
| H | 1.119870  | -2.885644 | -2.701770 |
| H | 0.334900  | -3.783657 | -1.656064 |
| O | 3.433293  | -3.182589 | 1.885297  |
| H | 3.403450  | -3.388375 | 0.918500  |
| H | 3.791121  | -3.974285 | 2.314796  |
| O | -1.297941 | -3.590990 | 2.020815  |
| H | -1.195052 | -3.731679 | 1.056520  |
| H | -0.464742 | -3.179993 | 2.354731  |
| O | 0.979493  | -2.565565 | 3.099436  |
| H | 1.009222  | -1.639649 | 3.420461  |
| H | 1.829371  | -2.740718 | 2.645131  |
| O | 3.449991  | -3.692080 | -0.799247 |
| H | 3.867592  | -4.547138 | -0.984315 |
| H | 2.563536  | -3.711116 | -1.266381 |
| O | -3.424734 | 3.218022  | -2.130357 |
| H | -3.404230 | 3.343101  | -1.150583 |
| H | -3.974193 | 2.423361  | -2.296440 |
| O | -1.038850 | 2.733622  | -3.166435 |
| H | -1.098965 | 2.896163  | -4.119814 |
| H | -1.931928 | 2.972287  | -2.779287 |
| O | 1.200049  | 4.134848  | 0.687348  |
| H | 1.201794  | 3.974102  | -0.279856 |
| H | 2.025313  | 3.745164  | 1.049681  |
| O | -3.434646 | 3.606185  | 0.575138  |
| H | -3.986450 | 2.947315  | 1.045426  |
| H | -2.575234 | 3.630672  | 1.046828  |
| O | -1.054527 | 3.723213  | 2.049128  |
| H | -1.124548 | 4.509461  | 2.611554  |

|   |           |           |           |
|---|-----------|-----------|-----------|
| H | -0.213105 | 3.840363  | 1.527698  |
| O | 1.214455  | 3.824984  | -2.094791 |
| H | 0.376862  | 3.459164  | -2.472342 |
| H | 1.310718  | 4.711414  | -2.474868 |
| O | -3.614463 | -3.286925 | -1.735215 |
| H | -4.086791 | -4.022156 | -2.155445 |
| H | -4.189953 | -2.985017 | -0.967302 |
| O | -0.904187 | 0.019692  | -2.508003 |
| H | -0.920204 | 0.964793  | -2.767879 |
| H | -1.750278 | -0.359998 | -2.822382 |
| O | 3.529340  | -0.099497 | -3.633874 |
| H | 3.914893  | -0.056752 | -4.521678 |
| H | 3.506622  | 0.839939  | -3.295516 |
| O | 1.073846  | -1.458997 | -3.679007 |
| H | 1.917402  | -0.960742 | -3.654430 |
| H | 0.391341  | -0.870312 | -3.277959 |
| O | 3.567395  | 2.394665  | -2.702826 |
| H | 2.718722  | 2.839179  | -2.498502 |
| H | 4.112714  | 2.434848  | -1.879412 |
| O | -3.314527 | -1.135015 | -3.371239 |
| H | -3.299176 | -1.415903 | -4.298472 |
| H | -3.446248 | -1.953013 | -2.829083 |
| O | -3.557422 | 0.144801  | 3.531072  |
| H | -3.911457 | 0.115536  | 4.433242  |
| H | -3.531684 | -0.794817 | 3.218078  |
| O | -3.585780 | -2.422174 | 2.626750  |
| H | -2.698398 | -2.838593 | 2.415982  |
| H | -4.009245 | -3.007714 | 3.272957  |
| O | 3.583921  | 3.177464  | 1.751969  |
| H | 4.007404  | 3.899461  | 2.240152  |
| H | 3.529466  | 2.408118  | 2.388512  |
| O | 1.060003  | 0.021671  | 4.162325  |
| H | 0.256109  | 0.577028  | 3.970120  |
| H | 1.086270  | -0.075398 | 5.126261  |
| O | -1.114050 | 1.515622  | 3.746838  |
| H | -1.948458 | 1.026930  | 3.591780  |
| H | -1.085586 | 2.259161  | 3.106342  |
| O | 3.525562  | 1.112163  | 3.417682  |
| H | 2.639851  | 0.753853  | 3.639842  |
| H | 4.049924  | 0.360124  | 3.049510  |
| O | 5.036166  | -0.927621 | 2.394396  |
| H | 4.496320  | -1.723386 | 2.205476  |
| H | 5.434968  | -0.661960 | 1.538197  |
| O | 5.135072  | 2.455276  | -0.464534 |
| H | 4.612039  | 2.693309  | 0.330669  |
| H | 5.495482  | 1.557985  | -0.298969 |
| O | 5.056148  | -1.696675 | -1.945142 |
| H | 4.500556  | -1.154451 | -2.547507 |
| H | 4.468445  | -2.380326 | -1.557678 |
| O | 6.111088  | -0.133664 | -0.060577 |
| H | 5.747499  | -0.729409 | -0.774048 |
| H | 7.076028  | -0.203660 | -0.109050 |
| O | -6.039714 | 0.068342  | -0.198888 |
| H | -5.679946 | 0.407968  | -1.044727 |
| H | -5.717141 | 0.674053  | 0.500962  |
| O | -5.098941 | -2.455238 | 0.272461  |
| H | -5.434330 | -1.539229 | 0.111321  |
| H | -4.578508 | -2.420460 | 1.103745  |

|   |           |          |           |
|---|-----------|----------|-----------|
| O | -4.968143 | 0.924006 | -2.649000 |
| H | -5.652958 | 1.079072 | -3.316914 |
| H | -4.419841 | 0.173969 | -2.981731 |
| O | -5.069470 | 1.708938 | 1.857165  |
| H | -5.776833 | 2.123874 | 2.373473  |
| H | -4.558516 | 1.149051 | 2.489881  |

---

**Table S27.** M06-2X/6-31+G\*/PCM optimized Cartesian coordinates of the (H<sub>2</sub>O)<sub>32</sub> hollow clathrate in the octadecahedron 5<sup>12</sup>6<sup>6</sup>-D<sub>3h</sub> inverted configuration.

|   |           |           |           |
|---|-----------|-----------|-----------|
| O | 2.129848  | 3.968632  | -2.268163 |
| O | -0.233219 | 4.974416  | -1.556868 |
| O | -2.579149 | 3.659550  | -2.274616 |
| O | 2.206963  | 1.332006  | -3.208550 |
| O | 0.102539  | -2.534769 | -3.209464 |
| O | 0.001157  | -0.063948 | -2.205083 |
| O | -2.311900 | 1.156001  | -3.149668 |
| O | 2.416247  | -3.856051 | -2.317257 |
| O | -5.461789 | 1.254648  | 0.029958  |
| O | -4.198854 | 3.670930  | 0.025150  |
| O | -4.267897 | -2.753634 | -1.492344 |
| O | -4.566412 | -0.196370 | -2.209338 |
| O | -1.972836 | -4.159961 | -2.281451 |
| O | -2.494351 | 3.781701  | 2.134123  |
| O | -0.314919 | 4.981449  | 1.230295  |
| O | 2.139327  | 3.988613  | 2.132764  |
| O | -4.511043 | -0.177263 | 2.165418  |
| O | -2.239502 | 1.170576  | 3.114316  |
| O | 3.801695  | 3.997750  | -0.028494 |
| O | 5.214068  | 1.759601  | -0.061859 |
| O | 0.064033  | -0.045751 | 3.738801  |
| O | 2.383931  | 1.446627  | 3.280681  |
| O | 4.557219  | 0.316880  | 2.221647  |
| O | 4.472985  | -2.243169 | -1.526215 |
| O | 4.539897  | 0.256960  | -2.320492 |
| O | 2.437268  | -3.906799 | 2.179033  |
| O | 4.498326  | -2.292399 | 1.214642  |
| O | -4.162167 | -2.820000 | 1.293946  |
| O | -1.992378 | -4.103159 | 2.170415  |
| O | 0.233694  | -2.789505 | 3.196689  |
| O | -1.042958 | -5.518341 | -0.077441 |
| O | 1.696939  | -5.344293 | -0.128267 |
| H | 0.030317  | -0.049433 | 4.707905  |
| H | -0.777368 | 0.399518  | 3.452312  |
| H | 0.131395  | -1.818808 | 3.290036  |
| H | -0.597885 | -3.146573 | 2.817240  |
| H | -2.305621 | -4.725584 | 2.843823  |
| H | -2.797348 | -3.598976 | 1.867312  |
| H | -4.204772 | -2.796265 | 0.312798  |
| H | -4.263163 | -1.893030 | 1.597327  |
| H | 2.189193  | 2.310873  | 2.861155  |
| H | 1.541370  | 0.948315  | 3.348104  |
| H | -4.902016 | 0.344647  | 1.423861  |
| H | -5.169276 | -0.162758 | 2.876996  |

|   |           |           |           |
|---|-----------|-----------|-----------|
| H | -2.280427 | 2.076004  | 2.740641  |
| H | -3.005859 | 0.679154  | 2.751397  |
| H | -1.652250 | 4.220134  | 1.815575  |
| H | -2.826890 | 4.331732  | 2.859929  |
| H | -5.066761 | 2.161623  | 0.032700  |
| H | -6.423738 | 1.374554  | 0.020262  |
| H | -3.612366 | 3.746536  | 0.821176  |
| H | -4.780998 | 4.446016  | 0.040439  |
| H | 2.772110  | 4.017633  | 1.372364  |
| H | 2.492635  | 4.603275  | 2.794108  |
| H | -0.273893 | 4.981407  | 0.248686  |
| H | 0.537440  | 4.610440  | 1.545105  |
| H | -1.733801 | 4.098530  | -2.035235 |
| H | -3.138081 | 3.681508  | -1.469745 |
| H | 0.633986  | 4.577040  | -1.851249 |
| H | -0.245320 | 5.878431  | -1.905851 |
| H | -3.761563 | 0.256106  | -2.544058 |
| H | -4.877088 | 0.329106  | -1.442702 |
| H | 4.361443  | 3.166813  | -0.041716 |
| H | 4.418575  | 4.745080  | -0.048820 |
| H | -2.391053 | 2.102742  | -2.843745 |
| H | -2.317368 | 1.182923  | -4.118311 |
| H | 2.730793  | 3.977559  | -1.491969 |
| H | 2.136270  | 3.048204  | -2.608039 |
| H | 2.200668  | 1.288029  | -4.176695 |
| H | 3.056204  | 0.911009  | -2.920902 |
| H | 0.766905  | 0.452666  | -2.535495 |
| H | -0.803563 | 0.398509  | -2.526649 |
| H | 4.491147  | -0.711725 | -2.050709 |
| H | 5.252879  | 0.321452  | -2.973905 |
| H | 0.061455  | -1.603875 | -2.853832 |
| H | 0.096592  | -2.454939 | -4.174845 |
| H | 4.979844  | 1.213411  | -0.843818 |
| H | 4.995224  | 1.223467  | 0.732194  |
| H | -5.051791 | -3.215728 | -1.825568 |
| H | -4.362041 | -1.805316 | -1.785133 |
| H | 5.244434  | 0.394406  | 2.900227  |
| H | 3.729640  | 0.702808  | 2.620617  |
| H | -1.282138 | -3.548076 | -2.613862 |
| H | -2.749992 | -3.609879 | -2.049177 |
| H | 4.463983  | -2.268764 | -0.539339 |
| H | 3.709366  | -2.794260 | -1.827220 |
| H | 2.139405  | -4.397286 | -1.538893 |
| H | 1.612981  | -3.385107 | -2.622168 |
| H | 4.452732  | -1.396378 | 1.608842  |
| H | 3.754150  | -2.807557 | 1.592430  |
| H | 1.955151  | -4.859902 | 0.683336  |
| H | 0.713414  | -5.423376 | -0.094122 |
| H | -1.389566 | -5.030576 | -0.861410 |
| H | -1.376077 | -5.035309 | 0.707282  |
| H | 2.761925  | -4.494042 | 2.877835  |
| H | 1.632341  | -3.455539 | 2.552708  |

**Table S28.** M06-2X/6-31+G\*/PCM optimized Cartesian coordinates of the (H<sub>2</sub>O)<sub>32</sub> hollow clathrate in the

octadecahedron  $5^{12}6^6-D_{3h}$  configuration.

|   |           |           |           |
|---|-----------|-----------|-----------|
| O | -3.681968 | 2.684507  | 2.228743  |
| O | -1.972126 | 4.556917  | 1.472046  |
| O | 0.697447  | 4.289756  | 2.182047  |
| O | -2.659091 | 0.397598  | 3.317873  |
| O | 1.171080  | -2.457877 | 3.467438  |
| O | 0.077976  | 0.037188  | 3.935126  |
| O | 1.731304  | 2.154469  | 3.385295  |
| O | -0.418688 | -4.475799 | 2.274113  |
| O | 4.303911  | 3.509320  | -0.155752 |
| O | 2.089387  | 5.090074  | -0.127587 |
| O | 5.054353  | -0.584866 | 1.326965  |
| O | 4.203118  | 1.826012  | 2.091194  |
| O | 3.631370  | -2.842430 | 2.152632  |
| O | 0.511736  | 4.472906  | -2.244600 |
| O | -1.959562 | 4.595453  | -1.312168 |
| O | -3.726680 | 2.612306  | -2.185884 |
| O | 4.074231  | 1.835428  | -2.314663 |
| O | 1.430596  | 2.022616  | -3.240488 |
| O | -5.190570 | 1.906138  | -0.001102 |
| O | -5.444684 | -0.725001 | 0.081871  |
| O | -0.103777 | -0.090763 | -3.840443 |
| O | -2.837145 | 0.216410  | -3.328059 |
| O | -4.268740 | -1.747604 | -2.223735 |
| O | -2.996467 | -3.989101 | 1.513027  |
| O | -4.126617 | -1.744737 | 2.312645  |
| O | -0.492635 | -4.584856 | -2.240542 |
| O | -3.039764 | -4.055648 | -1.230255 |
| O | 4.948059  | -0.687213 | -1.459088 |
| O | 3.562717  | -2.803271 | -2.309642 |
| O | 0.974006  | -2.623746 | -3.311996 |
| O | 3.376346  | -4.474996 | -0.046603 |
| O | 0.837320  | -5.500639 | 0.067878  |
| H | -0.090545 | -0.080056 | -4.809997 |
| H | 0.458217  | 0.681568  | -3.565055 |
| H | 0.633669  | -1.708933 | -3.405516 |
| H | 1.882264  | -2.572314 | -2.943892 |
| H | 4.113528  | -3.227664 | -2.984585 |
| H | 4.063696  | -1.992228 | -2.017507 |
| H | 4.989690  | -0.644937 | -0.478615 |
| H | 4.624522  | 0.188113  | -1.760244 |
| H | -3.038425 | 1.081959  | -2.914279 |
| H | -1.862683 | 0.144255  | -3.416401 |
| H | 4.196880  | 2.465350  | -1.564076 |
| H | 4.652865  | 2.152279  | -3.025107 |
| H | 1.068430  | 2.852527  | -2.864783 |
| H | 2.340245  | 1.926400  | -2.888767 |
| H | -0.434990 | 4.498023  | -1.918016 |
| H | 0.567397  | 5.122940  | -2.961701 |
| H | 3.545804  | 4.144896  | -0.153677 |
| H | 5.111364  | 4.045797  | -0.146998 |
| H | 1.529194  | 4.911987  | -0.926276 |
| H | 2.247223  | 6.046401  | -0.111666 |
| H | -4.298012 | 2.363942  | -1.416342 |
| H | -4.322573 | 3.005554  | -2.841854 |
| H | -1.977507 | 4.578953  | -0.329598 |
| H | -2.563204 | 3.883336  | -1.615188 |

|   |           |           |           |
|---|-----------|-----------|-----------|
| H | -0.258391 | 4.333136  | 1.958883  |
| H | 1.180381  | 4.560642  | 1.373511  |
| H | -2.604304 | 3.844817  | 1.781842  |
| H | -2.312055 | 5.391605  | 1.828205  |
| H | 3.317392  | 1.893086  | 2.507526  |
| H | 4.201559  | 2.437100  | 1.324919  |
| H | -5.316073 | 0.912348  | 0.031812  |
| H | -6.077630 | 2.295907  | 0.023104  |
| H | 1.296613  | 2.926892  | 2.924673  |
| H | 1.995068  | 2.489951  | 4.256389  |
| H | -4.215465 | 2.398353  | 1.457023  |
| H | -3.274136 | 1.867734  | 2.603774  |
| H | -1.699717 | 0.232968  | 3.411940  |
| H | -3.068961 | -0.416320 | 2.954679  |
| H | 0.010295  | 0.092147  | 4.901379  |
| H | 0.656981  | 0.795538  | 3.673985  |
| H | -3.673729 | -2.597730 | 2.040482  |
| H | -4.780055 | -1.991055 | 2.984533  |
| H | 0.790961  | -1.554264 | 3.574925  |
| H | 1.322968  | -2.781703 | 4.368562  |
| H | -4.972784 | -1.098102 | 0.859633  |
| H | -5.028604 | -1.117985 | -0.716690 |
| H | 5.966671  | -0.656885 | 1.645541  |
| H | 4.722693  | 0.301662  | 1.639187  |
| H | -4.934257 | -1.984338 | -2.886941 |
| H | -3.704094 | -1.039695 | -2.639291 |
| H | 2.779083  | -2.609012 | 2.573863  |
| H | 4.075592  | -2.001710 | 1.913997  |
| H | -2.990106 | -4.013594 | 0.526548  |
| H | -2.061816 | -4.124682 | 1.802235  |
| H | 0.069402  | -4.824273 | 1.489146  |
| H | 0.108062  | -3.731362 | 2.627530  |
| H | -3.406324 | -3.235258 | -1.621228 |
| H | -2.152158 | -4.186631 | -1.625927 |
| H | 0.377616  | -5.195355 | -0.741725 |
| H | 1.758614  | -5.151211 | 0.003909  |
| H | 3.470966  | -3.880213 | 0.733891  |
| H | 3.448483  | -3.898271 | -0.835520 |
| H | -0.530780 | -5.269895 | -2.924486 |
| H | 0.023447  | -3.830915 | -2.635966 |

**Table S29.** M06-2X/6-31+G\*/PCM optimized Cartesian coordinates of the (H<sub>2</sub>O)<sub>34</sub> hollow clathrate in the nonadecahedron 5<sup>12</sup>6<sup>7</sup>-C<sub>3v</sub> configuration.

|   |           |           |           |
|---|-----------|-----------|-----------|
| O | -5.535504 | -0.849111 | 0.868052  |
| O | -4.016290 | -2.857059 | 1.914899  |
| O | -5.028439 | -0.776193 | -1.875811 |
| O | -4.148269 | 1.632927  | -2.534101 |
| O | -1.516105 | 1.892364  | -3.457455 |
| O | -3.404221 | -2.949662 | -2.503525 |
| O | -0.837636 | -2.698849 | -3.551878 |
| O | 0.132610  | -0.126423 | -4.056884 |
| O | -0.586395 | -5.391242 | -0.111607 |
| O | -3.183684 | -4.387523 | -0.269413 |

|   |           |           |           |
|---|-----------|-----------|-----------|
| O | 1.048571  | -4.782952 | 2.093094  |
| O | 1.832601  | 4.749289  | -1.884125 |
| O | -0.698212 | 4.406987  | -2.581945 |
| O | 1.965690  | 5.287208  | 0.784248  |
| O | 4.979575  | 2.207464  | -0.141840 |
| O | 3.596291  | 3.425872  | 1.977691  |
| O | 2.820391  | 0.380179  | -3.485572 |
| O | 3.648292  | 2.695555  | -2.480620 |
| O | -2.215913 | 4.963569  | -0.316199 |
| O | -4.381596 | 3.189201  | -0.305648 |
| O | -4.752235 | 1.476690  | 1.867244  |
| O | -0.625910 | 4.987417  | 1.824098  |
| O | -0.549979 | 2.755964  | 3.487236  |
| O | -2.631643 | 1.099850  | 3.632746  |
| O | 2.070779  | 1.816668  | 3.690288  |
| O | -2.115611 | -1.641516 | 3.586370  |
| O | 0.358480  | -2.633695 | 3.752393  |
| O | 2.478118  | -0.820257 | 3.623395  |
| O | 4.529799  | -1.887851 | 2.071456  |
| O | 5.423687  | -0.554131 | -0.057509 |
| O | 0.663559  | -4.562423 | -2.399398 |
| O | 3.306024  | -3.995734 | -1.652069 |
| O | 4.336658  | -1.663690 | -2.367895 |
| O | 3.544310  | -4.308455 | 1.045019  |
| H | -5.255682 | 0.027906  | 1.261709  |
| H | -6.482918 | -0.941411 | 1.050614  |
| H | -4.577163 | -3.403747 | 2.486290  |
| H | -4.605237 | -2.147181 | 1.556722  |
| H | -3.416998 | -3.861993 | 0.525644  |
| H | -2.266858 | -4.714096 | -0.144263 |
| H | -3.893991 | -3.495275 | -3.137722 |
| H | -3.322548 | -3.500531 | -1.674648 |
| H | -2.755674 | -2.050064 | 2.966532  |
| H | -2.262619 | -0.671639 | 3.555585  |
| H | -5.207182 | -0.829152 | -0.912019 |
| H | -4.432376 | -1.526424 | -2.092689 |
| H | -3.953924 | 1.398194  | 2.433867  |
| H | -4.539141 | 2.099364  | 1.139657  |
| H | -2.992774 | 1.281534  | 4.513845  |
| H | -1.842396 | 1.701326  | 3.539116  |
| H | -4.723343 | 1.942571  | -3.250481 |
| H | -4.459961 | 0.708977  | -2.308164 |
| H | -4.329135 | 2.638562  | -1.126574 |
| H | -5.196931 | 3.707652  | -0.385836 |
| H | 0.365950  | 2.404040  | 3.495587  |
| H | -0.570780 | 3.510514  | 2.859934  |
| H | -1.700509 | 4.763673  | -1.128528 |
| H | -2.961622 | 4.326876  | -0.296619 |
| H | -0.884162 | 5.759167  | 2.349983  |
| H | -1.249110 | 4.961811  | 1.045709  |
| H | -0.872200 | 5.052413  | -3.283488 |
| H | 0.266942  | 4.515285  | -2.338804 |
| H | -1.195161 | 2.757065  | -3.121875 |
| H | -2.417364 | 1.760169  | -3.095457 |
| H | 2.356941  | 2.059369  | 4.583991  |
| H | 2.199739  | 0.831241  | 3.628058  |
| H | 1.068648  | 5.198007  | 1.169010  |
| H | 2.530234  | 4.619983  | 1.241232  |



|   |           |           |           |
|---|-----------|-----------|-----------|
| H | 2.425920  | 3.994152  | -2.079321 |
| H | 1.903599  | 4.926373  | -0.912986 |
| H | 3.093597  | 2.782494  | 2.520139  |
| H | 4.051637  | 2.919860  | 1.273573  |
| H | 4.245315  | 3.047776  | -3.158296 |
| H | 3.296153  | 1.835973  | -2.847639 |
| H | 4.519563  | 2.410389  | -0.993692 |
| H | 5.842385  | 2.646307  | -0.195295 |
| H | 1.867155  | 0.176868  | -3.597618 |
| H | 3.251451  | -0.400793 | -3.075978 |
| H | 5.246072  | 0.410429  | -0.074119 |
| H | 5.043680  | -0.922680 | -0.885309 |
| H | 3.922007  | -2.540122 | -2.119339 |
| H | 5.040391  | -1.871621 | -3.000887 |
| H | 5.300932  | -2.047228 | 2.636049  |
| H | 4.860387  | -1.355433 | 1.295460  |
| H | -0.472266 | 0.613825  | -3.781892 |
| H | 0.132100  | -0.107032 | -5.026382 |
| H | 1.720790  | -1.443835 | 3.606664  |
| H | 3.172914  | -1.184298 | 3.033691  |
| H | -0.529495 | -1.771426 | -3.639578 |
| H | -1.743279 | -2.681869 | -3.173570 |
| H | -0.552678 | -2.245395 | 3.652549  |
| H | 0.389333  | -2.993207 | 4.652054  |
| H | -0.640356 | -6.358761 | -0.141006 |
| H | -0.126479 | -5.120670 | -0.944553 |
| H | 0.720923  | -4.018408 | 2.611795  |
| H | 0.421195  | -4.925068 | 1.354748  |
| H | 0.132137  | -3.832076 | -2.826121 |
| H | 0.709136  | -5.274964 | -3.055091 |
| H | 2.657806  | -4.464263 | 1.448079  |
| H | 3.879374  | -3.472481 | 1.431821  |
| H | 2.369347  | -4.142644 | -1.899902 |
| H | 3.366237  | -4.117838 | -0.671848 |

---

**Table S30.** M06-2X/6-31+G\*/PCM optimized Cartesian coordinates of the  $(\text{H}_2\text{O})_{36}$  hollow clathrate in the icosahedron  $5^{12}6^8-D_{6h}$  configuration.

|   |           |           |           |
|---|-----------|-----------|-----------|
| O | -2.865497 | -3.564446 | 2.367846  |
| H | -3.619679 | -2.997874 | 2.060774  |
| H | -3.263986 | -4.247993 | 2.929191  |
| O | 2.710667  | 0.155259  | 4.499898  |
| H | 3.071972  | 0.206805  | 5.397758  |
| H | 2.178312  | -0.676926 | 4.469219  |
| O | 2.466060  | -4.181693 | -1.902713 |
| H | 2.740078  | -5.019330 | -2.306577 |
| H | 1.941605  | -4.427154 | -1.103872 |
| O | 2.965884  | 3.698586  | -2.500655 |
| H | 2.414360  | 4.037378  | -1.767865 |
| H | 2.381984  | 3.159315  | -3.085392 |
| O | 4.862027  | -0.374771 | -2.738968 |
| H | 5.660060  | -0.451207 | -3.284188 |
| H | 4.102509  | -0.378936 | -3.373045 |

|   |           |           |           |
|---|-----------|-----------|-----------|
| O | 2.710354  | -0.409327 | -4.426360 |
| H | 2.993474  | -0.501063 | -5.348914 |
| H | 2.159211  | -1.216593 | -4.229407 |
| O | -1.468856 | -1.996611 | 4.243684  |
| H | -1.848641 | -2.548327 | 3.529681  |
| H | -0.491968 | -2.065608 | 4.189066  |
| O | -1.649918 | -4.807147 | 0.265047  |
| H | -1.925919 | -5.734187 | 0.345254  |
| H | -2.071174 | -4.339730 | 1.030858  |
| O | -1.470895 | -2.607874 | -4.038263 |
| H | -1.678024 | -3.124819 | -4.832121 |
| H | -1.926813 | -3.070650 | -3.296264 |
| O | 2.905470  | 3.928724  | 1.930934  |
| H | 3.289058  | 4.681166  | 2.407269  |
| H | 3.682830  | 3.352647  | 1.656448  |
| O | -1.105307 | 4.968302  | -0.249077 |
| H | -1.288006 | 5.918161  | -0.313811 |
| H | -0.121425 | 4.890459  | -0.242243 |
| O | -1.182350 | 2.253814  | -4.322465 |
| H | -1.604375 | 2.800694  | -3.621975 |
| H | -1.680257 | 1.405797  | -4.347177 |
| O | 4.790797  | -2.467153 | 1.467788  |
| H | 4.788370  | -2.517806 | 0.471563  |
| H | 5.572234  | -2.960987 | 1.758680  |
| O | -2.661849 | -0.077942 | -4.456868 |
| H | -3.451649 | -0.045165 | -3.877840 |
| H | -2.227127 | -0.936559 | -4.278037 |
| O | 4.831340  | 0.069788  | 2.649905  |
| H | 4.083165  | 0.068508  | 3.282150  |
| H | 4.809761  | -0.798198 | 2.194880  |
| O | 1.103603  | -4.896415 | 0.382848  |
| H | 0.121894  | -4.800272 | 0.346584  |
| H | 1.264679  | -5.839701 | 0.542148  |
| O | 1.645962  | 4.881856  | -0.288811 |
| H | 2.080495  | 4.525783  | 0.527651  |
| H | 1.947553  | 5.800759  | -0.361648 |
| O | -2.663783 | 0.381378  | 4.494060  |
| H | -2.992619 | 0.405621  | 5.405236  |
| H | -2.179746 | -0.483165 | 4.401391  |
| O | 4.998341  | 2.163400  | -1.490200 |
| H | 4.262476  | 2.699329  | -1.872698 |
| H | 4.927670  | 1.273240  | -1.890466 |
| O | 1.417339  | 2.574212  | 3.896813  |
| H | 1.849966  | 1.713661  | 4.072775  |
| H | 1.921804  | 3.003692  | 3.174911  |
| O | 1.320954  | -2.625430 | -3.923227 |
| H | 1.635576  | -3.162638 | -3.166421 |
| H | 0.341437  | -2.606134 | -3.884616 |
| O | -2.615784 | 4.148938  | 1.993714  |
| H | -2.007409 | 4.369116  | 1.260114  |
| H | -2.090151 | 3.663832  | 2.673348  |
| O | 4.733912  | -2.697657 | -1.186204 |
| H | 3.933197  | -3.191982 | -1.461991 |
| H | 4.750421  | -1.868573 | -1.711197 |
| O | 1.544507  | 2.156722  | -4.247990 |
| H | 1.852071  | 1.228705  | -4.273046 |
| H | 0.557565  | 2.141181  | -4.248956 |
| O | 1.311730  | -2.198414 | 4.363570  |

|   |           |           |           |
|---|-----------|-----------|-----------|
| H | 1.457417  | -2.690552 | 5.186369  |
| H | 1.731982  | -2.748100 | 3.642976  |
| O | -1.320021 | 2.794904  | 3.985311  |
| H | -1.712083 | 1.911895  | 4.144683  |
| H | -0.345188 | 2.672038  | 3.927887  |
| O | 2.501783  | -3.667949 | 2.497514  |
| H | 3.296312  | -3.245065 | 2.103021  |
| H | 1.969135  | -4.021812 | 1.755913  |
| O | 4.937775  | 2.409930  | 1.225283  |
| H | 4.895668  | 1.532042  | 1.672054  |
| H | 4.956868  | 2.247915  | 0.250814  |
| O | -2.868093 | -3.875786 | -2.027793 |
| H | -3.310217 | -4.656665 | -2.395818 |
| H | -2.381005 | -4.195385 | -1.230908 |
| O | -2.458009 | 3.816487  | -2.433944 |
| H | -1.964115 | 4.159210  | -1.661025 |
| H | -3.258336 | 3.372088  | -2.085490 |
| O | -4.819314 | 0.344509  | 2.721714  |
| H | -4.055358 | 0.392903  | 3.336290  |
| H | -4.780394 | 1.152377  | 2.151877  |
| O | -4.909907 | -2.096180 | -1.261671 |
| H | -4.891716 | -1.999957 | -0.284911 |
| H | -4.177415 | -2.702953 | -1.496971 |
| O | -4.923002 | -1.995927 | 1.522937  |
| H | -5.766844 | -2.382546 | 1.803398  |
| H | -4.879817 | -1.088627 | 1.952754  |
| O | -4.935491 | 0.071658  | -2.802638 |
| H | -5.736839 | -0.006778 | -3.342285 |
| H | -4.936640 | -0.717613 | -2.191561 |
| O | -4.801137 | 2.514273  | -1.577370 |
| H | -5.571481 | 3.015829  | -1.884494 |
| H | -4.871959 | 1.623481  | -1.999519 |
| O | -4.761381 | 2.623793  | 1.236975  |
| H | -3.979493 | 3.179969  | 1.470540  |
| H | -4.758595 | 2.535560  | 0.262216  |

---

**Table S31.** M06-2X/6-31+G\*/PCM optimized Cartesian coordinates of the  $\text{CH}_4@(\text{H}_2\text{O})_{16}$  4<sup>25</sup> methane-clathrate.

|   |           |           |           |
|---|-----------|-----------|-----------|
| O | -0.773735 | 3.267718  | -0.713957 |
| H | -0.328398 | 3.151645  | 0.160055  |
| H | -1.651178 | 2.838177  | -0.616409 |
| O | -0.432937 | -0.673227 | -3.104012 |
| H | -0.077158 | 0.233773  | -2.943207 |
| H | -0.512866 | -0.762734 | -4.065944 |
| O | 3.055000  | -0.938163 | 1.619646  |
| H | 2.198639  | -1.238330 | 1.995611  |
| H | 3.014259  | 0.041713  | 1.585597  |
| O | 0.452975  | 2.901383  | 1.735335  |
| H | 0.035280  | 2.152633  | 2.207774  |
| H | 1.361709  | 2.590581  | 1.533634  |
| O | 3.125356  | -1.571083 | -0.974114 |
| H | 3.129587  | -1.425878 | 0.013235  |
| H | 3.975437  | -1.978447 | -1.198545 |
| O | -3.094178 | 0.358241  | 1.803440  |

|   |           |           |           |
|---|-----------|-----------|-----------|
| H | -3.073449 | -0.554854 | 1.443969  |
| H | -2.246992 | 0.479011  | 2.284163  |
| O | 2.931034  | 1.800155  | 1.086195  |
| H | 3.717368  | 2.313289  | 1.325697  |
| H | 2.971567  | 1.655745  | 0.099231  |
| O | -2.927500 | -0.599307 | -1.853916 |
| H | -2.058135 | -0.655085 | -2.305781 |
| H | -2.993333 | 0.312372  | -1.495943 |
| O | -0.482246 | -3.286350 | 0.651313  |
| H | -1.391089 | -2.932342 | 0.538980  |
| H | -0.030895 | -3.140311 | -0.214302 |
| O | 2.963085  | 1.163574  | -1.502256 |
| H | 2.102445  | 1.402782  | -1.910055 |
| H | 2.998266  | 0.183447  | -1.470308 |
| O | -3.121577 | 1.798216  | -0.447059 |
| H | -3.135540 | 1.343571  | 0.441046  |
| H | -3.962205 | 2.273325  | -0.528498 |
| O | -2.959910 | -2.043909 | 0.386250  |
| H | -3.740762 | -2.617094 | 0.414363  |
| H | -2.971487 | -1.587012 | -0.501268 |
| O | 0.511350  | 1.874773  | -2.591168 |
| H | 0.602338  | 2.434995  | -3.376919 |
| H | 0.029880  | 2.422274  | -1.904774 |
| O | 0.599290  | -1.798115 | 2.581769  |
| H | 0.681289  | -2.366293 | 3.362884  |
| H | 0.199682  | -2.366503 | 1.860285  |
| O | -0.627265 | 0.629913  | 3.077493  |
| H | -0.176169 | -0.235133 | 2.923454  |
| H | -0.695289 | 0.730759  | 4.039134  |
| O | 0.797697  | -2.874958 | -1.772599 |
| H | 0.349360  | -2.164105 | -2.274140 |
| H | 1.669474  | -2.496302 | -1.527985 |
| C | -0.012124 | -0.010887 | 0.024567  |
| H | -0.727270 | -0.649649 | 0.548123  |
| H | -0.556624 | 0.768321  | -0.512382 |
| H | 0.563653  | -0.615700 | -0.678624 |
| H | 0.669841  | 0.451777  | 0.741579  |

**Table S32.** M06-2X/6-31+G\*/PCM optimized Cartesian coordinates of the  $\text{CH}_4@(\text{H}_2\text{O})_{16}$  4<sup>3</sup>5<sup>6</sup>1 methane-clathrate.

|   |           |           |           |
|---|-----------|-----------|-----------|
| O | -2.408861 | 0.983279  | -2.197501 |
| H | -3.024340 | 1.226155  | -2.905619 |
| H | -2.283635 | 1.792672  | -1.643264 |
| O | 3.580960  | 0.107678  | -0.501017 |
| H | 3.263897  | -0.840532 | -0.589557 |
| H | 4.539335  | 0.100510  | -0.644876 |
| O | -1.827585 | 2.065131  | 2.140430  |
| H | -2.010096 | 2.386191  | 1.232317  |
| H | -2.078134 | 1.115540  | 2.148988  |
| O | -0.986310 | -2.696019 | 2.015338  |
| H | -0.040012 | -2.440381 | 2.075486  |
| H | -1.130593 | -2.990155 | 1.090255  |
| O | -2.627042 | -0.591855 | 2.094282  |
| H | -1.982497 | -1.351825 | 2.154554  |
| H | -3.336982 | -0.783308 | 2.725667  |

|   |           |           |           |
|---|-----------|-----------|-----------|
| O | 2.071658  | 1.679217  | -2.114950 |
| H | 2.707094  | 1.131544  | -1.589903 |
| H | 2.592810  | 2.133318  | -2.794217 |
| O | 0.816469  | 2.444030  | 2.230150  |
| H | -0.162415 | 2.260438  | 2.289348  |
| H | 1.010690  | 3.120794  | 2.896138  |
| O | -3.321043 | -1.080968 | -0.558938 |
| H | -3.008072 | -0.355058 | -1.140692 |
| H | -3.160620 | -0.785677 | 0.363435  |
| O | 2.576873  | -2.332277 | -0.538205 |
| H | 1.819338  | -2.394613 | -1.173776 |
| H | 2.192937  | -2.370779 | 0.363532  |
| O | 0.735553  | 3.404699  | -0.379502 |
| H | 1.210883  | 2.801845  | -0.991588 |
| H | 0.914489  | 3.077905  | 0.529069  |
| O | 0.515980  | -2.508763 | -2.302537 |
| H | 0.325120  | -1.593461 | -2.618333 |
| H | -0.266864 | -2.782751 | -1.780532 |
| O | 2.716623  | 0.418973  | 2.147667  |
| H | 3.078660  | 0.460339  | 1.237208  |
| H | 2.023729  | 1.112670  | 2.199209  |
| O | -1.890998 | 3.039032  | -0.494665 |
| H | -2.366736 | 3.871571  | -0.635662 |
| H | -0.914130 | 3.251125  | -0.530880 |
| O | 1.710385  | -2.058207 | 2.105117  |
| H | 2.042491  | -1.123720 | 2.210432  |
| H | 2.211861  | -2.599700 | 2.733179  |
| O | 0.053230  | 0.051060  | -3.187347 |
| H | -0.797346 | 0.385856  | -2.834827 |
| H | 0.748425  | 0.630202  | -2.811219 |
| O | -1.659173 | -3.168162 | -0.656766 |
| H | -2.120994 | -3.993541 | -0.866946 |
| H | -2.335905 | -2.437478 | -0.708481 |
| C | -0.011851 | -0.007024 | 0.159992  |
| H | 1.011943  | 0.128825  | -0.199945 |
| H | -0.638752 | 0.812386  | -0.202967 |
| H | -0.016657 | -0.010919 | 1.253144  |
| H | -0.401565 | -0.958630 | -0.211072 |

**Table S33.** M06-2X/6-31+G\*/PCM optimized Cartesian coordinates of the CH<sub>4</sub>@(H<sub>2</sub>O)<sub>17</sub> 4<sup>4</sup>5<sup>6</sup>6<sup>1</sup> methane-clathrate.

|   |           |           |           |
|---|-----------|-----------|-----------|
| O | 2.285027  | 1.916838  | 1.168277  |
| H | 2.011802  | 1.176804  | 1.757952  |
| H | 3.060155  | 1.559827  | 0.686016  |
| O | -1.043876 | -3.139555 | 1.302770  |
| H | -1.784331 | -2.873998 | 0.717569  |
| H | -0.247571 | -3.178232 | 0.730556  |
| O | -3.082270 | -2.120586 | -0.300898 |
| H | -3.348173 | -1.245172 | 0.107648  |
| H | -3.887224 | -2.657181 | -0.360640 |
| O | 1.245211  | -3.188533 | -0.305117 |
| H | 1.578312  | -4.087527 | -0.447367 |
| H | 1.975555  | -2.688976 | 0.156594  |
| O | -2.924289 | 1.386085  | -1.851292 |

|   |           |           |           |
|---|-----------|-----------|-----------|
| H | -2.487273 | 0.600587  | -2.238874 |
| H | -2.224320 | 2.047175  | -1.661886 |
| O | 2.237422  | 0.270614  | -2.712663 |
| H | 1.643266  | -0.536093 | -2.712998 |
| H | 2.622047  | 0.332668  | -3.599924 |
| O | -2.019179 | -1.165699 | -2.637251 |
| H | -2.436153 | -1.620924 | -1.865446 |
| H | -2.486674 | -1.485339 | -3.424150 |
| O | -1.974898 | 1.288998  | 2.557053  |
| H | -2.446493 | 1.647225  | 3.323914  |
| H | -1.342975 | 1.994519  | 2.259030  |
| O | 3.135031  | -1.792985 | 0.960440  |
| H | 3.502504  | -1.084360 | 0.390749  |
| H | 2.693610  | -1.319419 | 1.699869  |
| O | -0.306994 | 3.176936  | 1.570806  |
| H | -0.648046 | 3.324765  | 0.661218  |
| H | 0.623010  | 2.902095  | 1.465514  |
| O | -3.667973 | 0.319176  | 0.542998  |
| H | -3.076014 | 0.667709  | 1.242604  |
| H | -3.428173 | 0.800185  | -0.286744 |
| O | 1.794092  | -0.243177 | 2.808911  |
| H | 2.181253  | -0.135577 | 3.690560  |
| H | 0.859732  | -0.585646 | 2.942384  |
| O | 1.450729  | 2.599112  | -1.443054 |
| H | 1.618115  | 1.813201  | -2.006036 |
| H | 1.650535  | 2.305789  | -0.529764 |
| O | 0.685122  | -1.877554 | -2.686602 |
| H | -0.262453 | -1.621929 | -2.670561 |
| H | 0.853869  | -2.359998 | -1.846897 |
| O | -0.668576 | -1.111121 | 3.095768  |
| H | -0.840352 | -1.816045 | 2.424396  |
| H | -1.209660 | -0.329572 | 2.856305  |
| O | 3.912913  | 0.419636  | -0.555462 |
| H | 4.845574  | 0.538433  | -0.789384 |
| H | 3.414352  | 0.338175  | -1.403978 |
| O | -1.072087 | 3.320224  | -1.111285 |
| H | -1.263976 | 4.194129  | -1.483824 |
| H | -0.146773 | 3.082771  | -1.395156 |
| C | -0.145435 | -0.016653 | -0.161573 |
| H | -0.842133 | -0.853922 | -0.066905 |
| H | 0.877916  | -0.371941 | 0.001486  |
| H | -0.387097 | 0.747000  | 0.582463  |
| H | -0.226368 | 0.411459  | -1.164065 |

**Table S34.** M06-2X/6-31+G\*/PCM optimized Cartesian coordinates of the CH<sub>4</sub>@(H<sub>2</sub>O)<sub>18</sub> 4<sup>4</sup>5<sup>6</sup>6<sup>1</sup> methane-clathrate.

|   |           |           |           |
|---|-----------|-----------|-----------|
| O | 2.021200  | -2.586127 | 1.553284  |
| H | 1.181260  | -2.949159 | 1.167032  |
| H | 2.456757  | -3.323199 | 2.008188  |
| O | -2.432371 | -0.988896 | -2.653634 |
| H | -3.007125 | -1.132720 | -1.872350 |
| H | -2.189781 | -0.039302 | -2.617221 |
| O | 2.363316  | 1.501962  | -2.430382 |
| H | 2.967313  | 1.474879  | -1.658618 |

|   |           |           |           |
|---|-----------|-----------|-----------|
| H | 2.141145  | 0.564262  | -2.611333 |
| O | -1.982588 | 2.248014  | 2.065500  |
| H | -1.176643 | 2.721374  | 1.740210  |
| H | -2.412570 | 2.840085  | 2.700860  |
| O | -2.316763 | -2.302431 | 1.679110  |
| H | -1.978139 | -1.545872 | 2.219228  |
| H | -2.920983 | -1.909351 | 1.012046  |
| O | 1.984800  | -1.249532 | -2.743937 |
| H | 2.358740  | -1.618844 | -3.557810 |
| H | 1.122757  | -1.734771 | -2.581924 |
| O | -2.025777 | 1.762092  | -2.380329 |
| H | -2.439638 | 2.281688  | -3.085715 |
| H | -1.165745 | 2.224879  | -2.158216 |
| O | 2.314667  | 1.927832  | 1.951443  |
| H | 2.911811  | 1.657487  | 1.219013  |
| H | 2.010809  | 1.095267  | 2.372729  |
| O | -0.283740 | -3.398482 | 0.418853  |
| H | -0.417904 | -4.358414 | 0.445068  |
| H | -1.066707 | -2.990796 | 0.901619  |
| O | -0.250787 | -2.567708 | -2.258628 |
| H | -0.268092 | -2.830917 | -1.313802 |
| H | -1.035874 | -1.982982 | -2.397698 |
| O | 0.211254  | 3.025728  | -1.747920 |
| H | 0.243052  | 3.140427  | -0.774614 |
| H | 0.990082  | 2.465782  | -1.986603 |
| O | -3.894501 | -1.107431 | -0.266697 |
| H | -4.829507 | -1.359679 | -0.291627 |
| H | -3.863609 | -0.119268 | -0.124367 |
| O | 3.924536  | 1.108383  | -0.143273 |
| H | 3.893457  | 0.112658  | -0.202339 |
| H | 4.858596  | 1.363746  | -0.123775 |
| O | 0.280771  | 3.352928  | 1.044060  |
| H | 0.428413  | 4.281847  | 1.278617  |
| H | 1.065934  | 2.841004  | 1.398905  |
| O | 3.587797  | -1.502926 | -0.497539 |
| H | 3.025323  | -1.515286 | -1.303825 |
| H | 3.051121  | -1.903999 | 0.218332  |
| O | -3.576244 | 1.520719  | -0.098601 |
| H | -3.028252 | 1.700023  | -0.894921 |
| H | -3.029258 | 1.783732  | 0.672640  |
| O | 1.447332  | -0.441499 | 3.145280  |
| H | 1.692266  | -1.241346 | 2.619898  |
| H | 1.817682  | -0.573031 | 4.031314  |
| O | -1.339410 | -0.244885 | 3.175390  |
| H | -0.360789 | -0.299536 | 3.171447  |
| H | -1.560451 | 0.625757  | 2.783692  |
| C | -0.173475 | -0.020670 | -0.090031 |
| H | -1.174398 | -0.462310 | -0.064819 |
| H | 0.127068  | 0.144446  | -1.128471 |
| H | 0.536450  | -0.700832 | 0.391224  |
| H | -0.181653 | 0.934353  | 0.442321  |

**Table S35.** M06-2X/6-31+G\*/PC M optimized Cartesian coordinates of the CH<sub>4</sub>@(H<sub>2</sub>O)<sub>19</sub> 4<sup>4</sup>5<sup>6</sup>6<sup>1</sup> methane-clathrate.

|   |           |           |           |
|---|-----------|-----------|-----------|
| C | 0.163400  | 0.002718  | 0.070310  |
| H | -0.455905 | 0.747315  | -0.439892 |
| H | 1.175564  | 0.012649  | -0.347354 |
| H | -0.275420 | -0.991357 | -0.063181 |
| H | 0.207454  | 0.240897  | 1.136424  |
| O | 2.056578  | -2.378132 | -1.839118 |
| H | 2.781252  | -1.768154 | -1.556529 |
| H | 1.711800  | -2.793420 | -1.016993 |
| O | 3.882596  | -0.451523 | -1.208217 |
| H | 3.452896  | 0.264012  | -1.718406 |
| H | 3.782613  | -0.211601 | -0.262301 |
| O | 2.191839  | 1.232036  | -2.685874 |
| H | 1.486284  | 0.582456  | -2.905498 |
| H | 2.485449  | 1.613824  | -3.527146 |
| O | 1.536863  | 3.198449  | -0.828121 |
| H | 1.746651  | 2.891743  | 0.081239  |
| H | 1.798381  | 2.480714  | -1.442868 |
| O | 1.136453  | -3.510297 | 0.510205  |
| H | 1.412956  | -2.920524 | 1.268951  |
| H | 1.518908  | -4.383117 | 0.685438  |
| O | 2.081736  | 2.430063  | 1.778284  |
| H | 1.230821  | 2.296227  | 2.290138  |
| H | 2.569784  | 3.132138  | 2.235241  |
| O | -0.193897 | 2.055109  | 3.075478  |
| H | -0.924775 | 2.290260  | 2.462700  |
| H | -0.309178 | 1.104205  | 3.290339  |
| O | -0.430227 | -0.682050 | 3.542112  |
| H | -1.224902 | -1.035284 | 3.065390  |
| H | -0.554949 | -0.902001 | 4.477983  |
| O | 3.478954  | 0.122303  | 1.493745  |
| H | 3.006068  | 0.981920  | 1.626078  |
| H | 4.301041  | 0.184712  | 2.003732  |
| O | 1.846097  | -1.898813 | 2.491778  |
| H | 2.420004  | -1.182196 | 2.144431  |
| H | 1.055133  | -1.460553 | 2.873343  |
| O | 0.336001  | -0.822710 | -3.041410 |
| H | 0.967919  | -1.457680 | -2.570576 |
| H | 0.362402  | -1.072088 | -3.979733 |
| O | -1.582287 | 1.335715  | -2.959819 |
| H | -0.876024 | 0.668814  | -2.877660 |
| H | -1.360986 | 2.059344  | -2.335198 |
| O | -3.650102 | -0.115345 | -1.826999 |
| H | -3.021597 | 0.514759  | -2.245542 |
| H | -3.193177 | -0.981876 | -1.937432 |
| O | -3.666871 | 0.388602  | 0.838802  |
| H | -3.163397 | 1.217736  | 0.981829  |
| H | -3.664804 | 0.222251  | -0.138308 |
| O | -2.198555 | 2.725851  | 1.273040  |
| H | -1.811386 | 3.016599  | 0.409381  |
| H | -2.754760 | 3.456922  | 1.582371  |
| O | -2.035513 | -2.299581 | -2.224668 |
| H | -1.221391 | -1.821695 | -2.472327 |
| H | -1.857601 | -2.716618 | -1.346623 |
| O | -1.619677 | -3.426953 | 0.222655  |
| H | -1.946317 | -2.807592 | 0.909611  |
| H | -0.652692 | -3.508640 | 0.368333  |
| O | -2.545410 | -1.608298 | 2.125960  |
| H | -3.233793 | -2.002995 | 2.682777  |



|   |           |           |           |
|---|-----------|-----------|-----------|
| H | -2.981254 | -0.845595 | 1.636649  |
| O | -1.071211 | 3.363193  | -1.112299 |
| H | -0.075285 | 3.373764  | -0.993726 |
| H | -1.321119 | 4.232450  | -1.461226 |

---

**Table S36.** M06-2X/6-31+G\*/PCM optimized Cartesian coordinates of the CH<sub>4</sub>@(H<sub>2</sub>O)<sub>20</sub> 5<sup>12</sup> methane-clathrate.

|   |           |           |           |
|---|-----------|-----------|-----------|
| C | -0.104310 | -0.013275 | 0.033174  |
| H | -0.560868 | 0.980404  | -0.009326 |
| H | -0.111705 | -0.462087 | -0.965048 |
| H | -0.670341 | -0.644884 | 0.724359  |
| H | 0.927879  | 0.075590  | 0.386874  |
| O | 1.490437  | -3.383671 | 0.543091  |
| H | 0.729618  | -3.435533 | -0.072945 |
| H | 1.136608  | -3.032822 | 1.398502  |
| O | -2.426716 | 0.768416  | 2.816666  |
| H | -2.755255 | 1.133771  | 1.967322  |
| H | -1.537507 | 1.178350  | 2.973271  |
| O | 3.648940  | 0.338579  | 1.318565  |
| H | 3.579376  | -0.411668 | 0.688901  |
| H | 3.384128  | 1.144551  | 0.821870  |
| O | -0.499393 | 2.480265  | -2.887870 |
| H | -0.891030 | 2.846621  | -2.067606 |
| H | -0.976147 | 1.642423  | -3.071236 |
| O | -0.674297 | -3.553964 | -1.219795 |
| H | -1.483122 | -3.243959 | -0.744291 |
| H | -0.841619 | -4.476210 | -1.466775 |
| O | 2.133197  | 1.908096  | -2.501078 |
| H | 1.173950  | 2.102942  | -2.641702 |
| H | 2.243267  | 0.940709  | -2.617252 |
| O | -2.146533 | -1.828300 | 2.614428  |
| H | -2.279100 | -0.834442 | 2.712703  |
| H | -2.668364 | -2.247910 | 3.315351  |
| O | -0.000439 | -1.917431 | -3.364236 |
| H | -0.229625 | -2.519596 | -2.623841 |
| H | 0.896053  | -1.567728 | -3.169280 |
| O | 1.979589  | -0.069925 | 3.344086  |
| H | 2.629215  | 0.084649  | 2.601050  |
| H | 2.493636  | -0.065683 | 4.165157  |
| O | 0.591113  | 3.613966  | 1.254230  |
| H | -0.151159 | 3.608554  | 0.614694  |
| H | 1.373822  | 3.272779  | 0.770431  |
| O | 2.501867  | -0.844288 | -2.792132 |
| H | 2.859449  | -1.216796 | -1.946712 |
| H | 3.156257  | -1.048568 | -3.477305 |
| O | -3.388953 | 1.768035  | 0.398424  |
| H | -3.446644 | 1.005504  | -0.249712 |
| H | -4.289321 | 2.112834  | 0.498281  |
| O | 0.572123  | -2.421439 | 2.909728  |
| H | -0.378517 | -2.194225 | 2.833283  |
| H | 1.045545  | -1.580059 | 3.088443  |
| O | -3.504987 | -0.263847 | -1.279540 |
| H | -3.252845 | -1.087637 | -0.810832 |
| H | -2.881120 | -0.164220 | -2.032457 |

|   |           |           |           |
|---|-----------|-----------|-----------|
| O | -0.011151 | 1.888491  | 3.293934  |
| H | 0.220077  | 2.506350  | 2.559867  |
| H | 0.694404  | 1.208064  | 3.310040  |
| O | 3.367175  | -1.815183 | -0.412732 |
| H | 4.178166  | -2.342036 | -0.477474 |
| H | 2.658693  | -2.426015 | -0.043951 |
| O | -1.565286 | 3.547246  | -0.527483 |
| H | -1.971378 | 4.414705  | -0.674890 |
| H | -2.281882 | 2.957052  | -0.184149 |
| O | -2.843474 | -2.581842 | 0.119135  |
| H | -3.601867 | -3.184619 | 0.157064  |
| H | -2.624504 | -2.344865 | 1.057869  |
| O | 2.837760  | 2.605867  | -0.051966 |
| H | 3.539150  | 3.270622  | -0.122712 |
| H | 2.589346  | 2.355943  | -0.989951 |
| O | -1.769221 | 0.061927  | -3.411612 |
| H | -2.229156 | 0.043958  | -4.264226 |
| H | -1.103712 | -0.683139 | -3.431455 |

---

**Table S37.** M06-2X/6-31+G\*/PCM optimized Cartesian coordinates of the CH<sub>4</sub>@(H<sub>2</sub>O)<sub>22</sub> 4<sup>15</sup>1<sup>0</sup>6<sup>2</sup> methane-clathrate.

|   |           |           |           |
|---|-----------|-----------|-----------|
| O | 1.927800  | -3.611577 | 0.525200  |
| H | 2.150383  | -2.954879 | 1.220966  |
| H | 2.260452  | -3.233713 | -0.315213 |
| O | -1.655270 | -3.062020 | -1.882618 |
| H | -1.327314 | -3.395203 | -0.992695 |
| H | -1.845192 | -3.851918 | -2.411928 |
| O | -1.843113 | 3.012303  | 1.772146  |
| H | -1.417178 | 3.341005  | 0.951379  |
| H | -1.153259 | 2.536175  | 2.283857  |
| O | 2.529058  | 2.497898  | 2.088476  |
| H | 2.291990  | 2.930452  | 1.241306  |
| H | 1.681047  | 2.262061  | 2.522054  |
| O | -4.003703 | 1.619630  | 1.106184  |
| H | -3.197601 | 2.132874  | 1.395972  |
| H | -4.774633 | 2.092515  | 1.452806  |
| O | 2.725057  | 1.817012  | -2.317986 |
| H | 1.903113  | 1.473168  | -2.733493 |
| H | 2.440873  | 2.464308  | -1.636807 |
| O | 0.113630  | -0.857548 | 3.572311  |
| H | 0.943512  | -1.204902 | 3.175951  |
| H | -0.626359 | -1.340479 | 3.144789  |
| O | 0.477366  | -1.807257 | -3.158951 |
| H | -0.274048 | -2.210840 | -2.673025 |
| H | 1.295819  | -2.061694 | -2.681511 |
| O | -1.639558 | 2.430825  | -2.574420 |
| H | -0.957073 | 1.793686  | -2.876032 |
| H | -2.419267 | 1.907447  | -2.268142 |
| O | -1.942145 | -2.359785 | 2.458335  |
| H | -2.305906 | -2.928247 | 3.153879  |
| H | -2.720151 | -1.877029 | 2.060769  |
| O | 2.854857  | -2.468420 | -1.865042 |
| H | 3.380068  | -1.652222 | -1.670982 |
| H | 3.423690  | -3.042187 | -2.400144 |

|   |           |           |           |
|---|-----------|-----------|-----------|
| O | 0.428823  | 0.818782  | -3.508183 |
| H | 0.485784  | 0.945615  | -4.467510 |
| H | 0.405835  | -0.170034 | -3.362888 |
| O | -0.775486 | -3.901215 | 0.450349  |
| H | -1.159931 | -3.362824 | 1.175742  |
| H | 0.205925  | -3.781596 | 0.492477  |
| O | -0.754004 | 3.952286  | -0.613889 |
| H | -1.046773 | 4.858485  | -0.793868 |
| H | -1.094184 | 3.386685  | -1.370807 |
| O | 1.931632  | 3.656608  | -0.383828 |
| H | 0.960621  | 3.826073  | -0.479336 |
| H | 2.371062  | 4.511058  | -0.510561 |
| O | -3.919951 | -1.630554 | -1.419621 |
| H | -3.112845 | -2.161970 | -1.634584 |
| H | -4.671060 | -2.094695 | -1.818263 |
| O | 2.502954  | -1.772047 | 2.522633  |
| H | 3.052594  | -1.015221 | 2.161955  |
| H | 3.035161  | -2.182230 | 3.221130  |
| O | -3.870326 | 1.162719  | -1.650226 |
| H | -3.864833 | 0.184166  | -1.685180 |
| H | -3.963690 | 1.387623  | -0.700078 |
| O | -4.024962 | -1.146274 | 1.329621  |
| H | -4.003758 | -0.165209 | 1.358676  |
| H | -4.036968 | -1.380126 | 0.376913  |
| O | 0.118867  | 1.778033  | 3.301115  |
| H | 0.076479  | 2.137667  | 4.200134  |
| H | 0.075736  | 0.783585  | 3.398596  |
| O | 3.940844  | 0.225979  | 1.559480  |
| H | 3.436596  | 1.060560  | 1.724404  |
| H | 3.999886  | 0.122564  | 0.585858  |
| O | 4.101536  | -0.146062 | -1.212148 |
| H | 3.598161  | 0.605137  | -1.645835 |
| H | 5.019273  | -0.072419 | -1.515627 |
| C | 0.767680  | -0.227330 | 0.055203  |
| H | 0.083022  | -1.038333 | 0.321394  |
| H | 1.712981  | -0.652238 | -0.293226 |
| H | 0.957194  | 0.395636  | 0.934021  |
| H | 0.327434  | 0.381111  | -0.740008 |

**Table S38.** M06-2X/6-31+G\*/PCM optimized Cartesian coordinates of the  $C_2H_6@(H_2O)_{22}$   $4^15^{10}6^2$  ethane-clathrate.

|   |           |           |           |
|---|-----------|-----------|-----------|
| O | 1.336381  | -3.843045 | 0.472947  |
| H | 1.671761  | -3.290411 | 1.211731  |
| H | 1.758141  | -3.491814 | -0.338520 |
| O | -2.041549 | -2.832131 | -1.966536 |
| H | -1.805671 | -3.250630 | -1.083148 |
| H | -2.357841 | -3.552468 | -2.533266 |
| O | -1.313963 | 3.177527  | 1.830001  |
| H | -0.830249 | 3.468118  | 1.026434  |
| H | -0.712586 | 2.578208  | 2.324993  |
| O | 2.889153  | 2.044992  | 2.153470  |
| H | 2.753824  | 2.528077  | 1.311345  |
| H | 1.998137  | 1.908726  | 2.541236  |
| O | -3.639971 | 2.113874  | 1.162708  |

|   |           |           |           |
|---|-----------|-----------|-----------|
| H | -2.767466 | 2.510829  | 1.448658  |
| H | -4.336541 | 2.683168  | 1.521956  |
| O | 3.072278  | 1.496220  | -2.279573 |
| H | 2.192849  | 1.264525  | -2.654227 |
| H | 2.905439  | 2.167763  | -1.583140 |
| O | -0.072267 | -0.999251 | 3.438468  |
| H | 0.714482  | -1.480399 | 3.099570  |
| H | -0.862164 | -1.378790 | 2.995616  |
| O | 0.263165  | -1.807726 | -3.118810 |
| H | -0.544671 | -2.136831 | -2.667736 |
| H | 1.033207  | -2.202295 | -2.656099 |
| O | -1.155121 | 2.687786  | -2.422634 |
| H | -0.576581 | 1.948751  | -2.711341 |
| H | -2.017510 | 2.298205  | -2.135405 |
| O | -2.325704 | -2.185387 | 2.347114  |
| H | -2.778918 | -2.666385 | 3.055987  |
| H | -3.004542 | -1.567424 | 1.951261  |
| O | 2.514970  | -2.799630 | -1.841091 |
| H | 3.136578  | -2.056960 | -1.634656 |
| H | 3.015506  | -3.441175 | -2.367185 |
| O | 0.624734  | 0.798387  | -3.366633 |
| H | 0.657275  | 0.932223  | -4.326431 |
| H | 0.450474  | -0.177842 | -3.235986 |
| O | -1.379094 | -3.874269 | 0.354815  |
| H | -1.718035 | -3.306693 | 1.081159  |
| H | -0.392082 | -3.850690 | 0.417719  |
| O | -0.040811 | 4.037935  | -0.478765 |
| H | -0.218471 | 4.978743  | -0.630156 |
| H | -0.472486 | 3.537955  | -1.238663 |
| O | 2.576050  | 3.379415  | -0.286788 |
| H | 1.641346  | 3.695822  | -0.373225 |
| H | 3.139102  | 4.164867  | -0.361016 |
| O | -3.975041 | -0.988321 | -1.515886 |
| H | -3.271435 | -1.655046 | -1.720047 |
| H | -4.785951 | -1.307802 | -1.939612 |
| O | 2.230556  | -2.230928 | 2.545037  |
| H | 2.876349  | -1.548218 | 2.195671  |
| H | 2.692153  | -2.713984 | 3.246561  |
| O | -3.578858 | 1.776662  | -1.603570 |
| H | -3.674995 | 0.805613  | -1.686196 |
| H | -3.634242 | 1.959778  | -0.641105 |
| O | -4.144627 | -0.610928 | 1.233762  |
| H | -3.942500 | 0.345407  | 1.321967  |
| H | -4.131010 | -0.793777 | 0.269365  |
| O | 0.391452  | 1.597389  | 3.306886  |
| H | 0.383231  | 1.907468  | 4.225052  |
| H | 0.176635  | 0.621247  | 3.341242  |
| O | 3.896365  | -0.419666 | 1.589230  |
| H | 3.538923  | 0.483802  | 1.774531  |
| H | 3.953479  | -0.500446 | 0.613293  |
| O | 4.079591  | -0.684473 | -1.185665 |
| H | 3.724298  | 0.150537  | -1.612989 |
| H | 5.005196  | -0.763465 | -1.462356 |
| C | -0.856713 | -0.125800 | -0.191009 |
| C | 0.607400  | 0.294120  | -0.067846 |
| H | -1.208534 | -0.047379 | -1.226786 |
| H | -1.503780 | 0.507782  | 0.428332  |
| H | -1.000846 | -1.164716 | 0.129749  |

|   |          |           |           |
|---|----------|-----------|-----------|
| H | 0.964183 | 0.194417  | 0.964038  |
| H | 0.746489 | 1.340369  | -0.368116 |
| H | 1.254414 | -0.322148 | -0.704817 |

---

**Table S39.** M06-2X/6-31+G\*/PCM optimized Cartesian coordinates of the  $C_2H_6@(H_2O)_{24}$   $5^{12}6^2$  ethane-clathrate.

|   |           |           |           |
|---|-----------|-----------|-----------|
| O | -4.117188 | -2.302408 | -0.993265 |
| H | -4.857082 | -2.892363 | -1.200688 |
| H | -3.504524 | -2.816749 | -0.396556 |
| O | -2.113232 | -2.249626 | 3.008445  |
| H | -2.469256 | -2.806868 | 3.717323  |
| H | -1.197631 | -2.005084 | 3.292257  |
| O | -2.448962 | -3.625057 | 0.608541  |
| H | -2.256411 | -3.134540 | 1.435975  |
| H | -1.588105 | -3.815631 | 0.178631  |
| O | -3.711555 | 0.046284  | 2.746438  |
| H | -3.135705 | 0.838396  | 2.809380  |
| H | -3.126219 | -0.732900 | 2.849310  |
| O | -2.130655 | 2.337705  | 2.885125  |
| H | -2.168029 | 2.821471  | 2.011160  |
| H | -2.486699 | 2.949556  | 3.546955  |
| O | -2.646735 | 1.336766  | -3.240936 |
| H | -3.128357 | 1.614823  | -4.035020 |
| H | -3.191853 | 1.641166  | -2.472555 |
| O | -2.667269 | -1.473556 | -3.225759 |
| H | -2.626436 | -0.494685 | -3.212302 |
| H | -3.210100 | -1.739418 | -2.452969 |
| O | -4.042237 | 2.138294  | -1.051406 |
| H | -4.380794 | 1.340657  | -0.542621 |
| H | -4.820363 | 2.674940  | -1.265844 |
| O | -4.899137 | 0.042724  | 0.293632  |
| H | -4.641889 | -0.792456 | -0.153870 |
| H | -4.474126 | 0.022250  | 1.186404  |
| O | 0.269981  | 1.330923  | 3.814142  |
| H | -0.567721 | 1.662633  | 3.423031  |
| H | 0.236733  | 0.350262  | 3.792182  |
| O | -2.336314 | 3.623132  | 0.573864  |
| H | -1.490941 | 3.784905  | 0.100822  |
| H | -2.902997 | 3.094955  | -0.028951 |
| O | 2.296941  | -3.654827 | 0.351264  |
| H | 2.785769  | -4.480391 | 0.492462  |
| H | 2.813139  | -3.146406 | -0.341179 |
| O | 1.935685  | -1.486231 | -3.507593 |
| H | 2.291500  | -1.759374 | -4.366611 |
| H | 1.065343  | -1.969532 | -3.402548 |
| O | -0.219243 | 2.733136  | -3.186856 |
| H | -1.063407 | 2.235110  | -3.178759 |
| H | -0.187047 | 3.249204  | -2.352911 |
| O | 2.064504  | 1.286981  | -3.435498 |
| H | 1.909238  | 0.318268  | -3.429311 |
| H | 1.191421  | 1.739201  | -3.334949 |
| O | 3.787123  | 2.094244  | -1.628850 |
| H | 3.137837  | 1.782768  | -2.330812 |
| H | 4.430773  | 2.660115  | -2.081776 |

|   |           |           |           |
|---|-----------|-----------|-----------|
| O | 4.868322  | -0.061109 | -0.391735 |
| H | 4.537578  | 0.746923  | -0.859224 |
| H | 5.829075  | -0.076399 | -0.518073 |
| O | 2.476792  | 2.197078  | 2.642307  |
| H | 2.884306  | 2.795614  | 3.286939  |
| H | 1.622537  | 1.886000  | 3.059917  |
| O | 2.574321  | -2.255848 | 2.758712  |
| H | 2.441457  | -2.715340 | 1.902190  |
| H | 3.140100  | -1.466263 | 2.570970  |
| O | 0.335872  | -1.448261 | 3.884065  |
| H | 1.171801  | -1.778704 | 3.435940  |
| H | 0.423608  | -1.686969 | 4.819767  |
| O | 4.103136  | -0.043735 | 2.300292  |
| H | 4.386609  | -0.039764 | 1.361942  |
| H | 3.535620  | 0.750019  | 2.409397  |
| O | 2.348998  | 3.564531  | 0.239775  |
| H | 2.869620  | 3.035884  | -0.403043 |
| H | 2.340506  | 3.054154  | 1.079456  |
| O | -0.006471 | 4.187730  | -0.818485 |
| H | 0.048334  | 5.138564  | -0.997820 |
| H | 0.861536  | 3.936358  | -0.392173 |
| O | 3.641566  | -2.306326 | -1.482889 |
| H | 3.047218  | -1.994261 | -2.201231 |
| H | 4.072090  | -1.508012 | -1.107518 |
| O | -0.112999 | -4.249925 | -0.774588 |
| H | -0.098601 | -5.202203 | -0.954830 |
| H | 0.751557  | -4.042591 | -0.339434 |
| O | -0.311668 | -2.844809 | -3.191813 |
| H | -1.146503 | -2.316402 | -3.186923 |
| H | -0.276553 | -3.326942 | -2.339061 |
| C | 1.142644  | 0.162016  | 0.441603  |
| C | -0.070637 | 1.089682  | 0.413011  |
| H | 2.035043  | 0.660854  | 0.043614  |
| H | 0.972205  | -0.739948 | -0.157826 |
| H | 1.372860  | -0.156625 | 1.464013  |
| H | -0.961157 | 0.595954  | 0.821476  |
| H | -0.303121 | 1.412932  | -0.608533 |
| H | 0.107555  | 1.990227  | 1.011290  |

**Table S40.** M06-2X/6-31+G\*/PCM optimized Cartesian coordinates of the  $C_2H_6@(H_2O)_{26}$   $5^{12}6^3$  ethane-clathrate.

|   |           |           |           |
|---|-----------|-----------|-----------|
| O | -4.117188 | -2.302408 | -0.993265 |
| H | -4.857082 | -2.892363 | -1.200688 |
| H | -3.504524 | -2.816749 | -0.396556 |
| O | -2.113232 | -2.249626 | 3.008445  |
| H | -2.469256 | -2.806868 | 3.717323  |
| H | -1.197631 | -2.005084 | 3.292257  |
| O | -2.448962 | -3.625057 | 0.608541  |
| H | -2.256411 | -3.134540 | 1.435975  |
| H | -1.588105 | -3.815631 | 0.178631  |
| O | -3.711555 | 0.046284  | 2.746438  |
| H | -3.135705 | 0.838396  | 2.809380  |
| H | -3.126219 | -0.732900 | 2.849310  |
| O | -2.130655 | 2.337705  | 2.885125  |

|   |           |           |           |
|---|-----------|-----------|-----------|
| H | -2.168029 | 2.821471  | 2.011160  |
| H | -2.486699 | 2.949556  | 3.546955  |
| O | -2.646735 | 1.336766  | -3.240936 |
| H | -3.128357 | 1.614823  | -4.035020 |
| H | -3.191853 | 1.641166  | -2.472555 |
| O | -2.667269 | -1.473556 | -3.225759 |
| H | -2.626436 | -0.494685 | -3.212302 |
| H | -3.210100 | -1.739418 | -2.452969 |
| O | -4.042237 | 2.138294  | -1.051406 |
| H | -4.380794 | 1.340657  | -0.542621 |
| H | -4.820363 | 2.674940  | -1.265844 |
| O | -4.899137 | 0.042724  | 0.293632  |
| H | -4.641889 | -0.792456 | -0.153870 |
| H | -4.474126 | 0.022250  | 1.186404  |
| O | 0.269981  | 1.330923  | 3.814142  |
| H | -0.567721 | 1.662633  | 3.423031  |
| H | 0.236733  | 0.350262  | 3.792182  |
| O | -2.336314 | 3.623132  | 0.573864  |
| H | -1.490941 | 3.784905  | 0.100822  |
| H | -2.902997 | 3.094955  | -0.028951 |
| O | 2.296941  | -3.654827 | 0.351264  |
| H | 2.785769  | -4.480391 | 0.492462  |
| H | 2.813139  | -3.146406 | -0.341179 |
| O | 1.935685  | -1.486231 | -3.507593 |
| H | 2.291500  | -1.759374 | -4.366611 |
| H | 1.065343  | -1.969532 | -3.402548 |
| O | -0.219243 | 2.733136  | -3.186856 |
| H | -1.063407 | 2.235110  | -3.178759 |
| H | -0.187047 | 3.249204  | -2.352911 |
| O | 2.064504  | 1.286981  | -3.435498 |
| H | 1.909238  | 0.318268  | -3.429311 |
| H | 1.191421  | 1.739201  | -3.334949 |
| O | 3.787123  | 2.094244  | -1.628850 |
| H | 3.137837  | 1.782768  | -2.330812 |
| H | 4.430773  | 2.660115  | -2.081776 |
| O | 4.868322  | -0.061109 | -0.391735 |
| H | 4.537578  | 0.746923  | -0.859224 |
| H | 5.829075  | -0.076399 | -0.518073 |
| O | 2.476792  | 2.197078  | 2.642307  |
| H | 2.884306  | 2.795614  | 3.286939  |
| H | 1.622537  | 1.886000  | 3.059917  |
| O | 2.574321  | -2.255848 | 2.758712  |
| H | 2.441457  | -2.715340 | 1.902190  |
| H | 3.140100  | -1.466263 | 2.570970  |
| O | 0.335872  | -1.448261 | 3.884065  |
| H | 1.171801  | -1.778704 | 3.435940  |
| H | 0.423608  | -1.686969 | 4.819767  |
| O | 4.103136  | -0.043735 | 2.300292  |
| H | 4.386609  | -0.039764 | 1.361942  |
| H | 3.535620  | 0.750019  | 2.409397  |
| O | 2.348998  | 3.564531  | 0.239775  |
| H | 2.869620  | 3.035884  | -0.403043 |
| H | 2.340506  | 3.054154  | 1.079456  |
| O | -0.006471 | 4.187730  | -0.818485 |
| H | 0.048334  | 5.138564  | -0.997820 |
| H | 0.861536  | 3.936358  | -0.392173 |
| O | 3.641566  | -2.306326 | -1.482889 |
| H | 3.047218  | -1.994261 | -2.201231 |

|   |           |           |           |
|---|-----------|-----------|-----------|
| H | 4.072090  | -1.508012 | -1.107518 |
| O | -0.112999 | -4.249925 | -0.774588 |
| H | -0.098601 | -5.202203 | -0.954830 |
| H | 0.751557  | -4.042591 | -0.339434 |
| O | -0.311668 | -2.844809 | -3.191813 |
| H | -1.146503 | -2.316402 | -3.186923 |
| H | -0.276553 | -3.326942 | -2.339061 |
| C | 1.142644  | 0.162016  | 0.441603  |
| C | -0.070637 | 1.089682  | 0.413011  |
| H | 2.035043  | 0.660854  | 0.043614  |
| H | 0.972205  | -0.739948 | -0.157826 |
| H | 1.372860  | -0.156625 | 1.464013  |
| H | -0.961157 | 0.595954  | 0.821476  |
| H | -0.303121 | 1.412932  | -0.608533 |
| H | 0.107555  | 1.990227  | 1.011290  |

---

**Table S41.** M06-2X/6-31+G\*/PCM optimized Cartesian coordinates of the  $C_3H_8@(H_2O)_{24}$   $5^{12}6^2$  propane-clathrate.

|   |           |           |           |
|---|-----------|-----------|-----------|
| C | 1.278522  | -0.327707 | 0.083082  |
| C | 0.038890  | 0.346586  | 0.661880  |
| C | -1.238465 | -0.238133 | 0.067180  |
| H | 2.200270  | 0.082024  | 0.505335  |
| H | 1.319245  | -0.194483 | -1.004709 |
| H | 1.262125  | -1.407875 | 0.285180  |
| H | 0.078841  | 1.427301  | 0.464811  |
| H | 0.029622  | 0.232102  | 1.755366  |
| H | -2.135661 | 0.244547  | 0.469340  |
| H | -1.307804 | -1.313726 | 0.277509  |
| H | -1.247903 | -0.111138 | -1.022630 |
| O | -1.530678 | -2.528992 | -2.790542 |
| H | -1.739832 | -3.114354 | -3.534315 |
| H | -0.534823 | -2.482016 | -2.756580 |
| O | 2.228207  | -3.807575 | -0.477296 |
| H | 2.688257  | -4.632710 | -0.693231 |
| H | 2.885486  | -3.233617 | -0.008838 |
| O | 1.133978  | -2.577958 | -2.731868 |
| H | 1.509318  | -2.999721 | -1.929894 |
| H | 1.666151  | -1.766021 | -2.880849 |
| O | -0.107175 | -4.122322 | 1.024290  |
| H | -0.049762 | -3.453275 | 1.740851  |
| H | 0.716701  | -4.033119 | 0.501269  |
| O | -0.007861 | -2.269007 | 3.081600  |
| H | -0.863242 | -1.749686 | 3.071512  |
| H | -0.019662 | -2.775194 | 3.908640  |
| O | -4.543488 | 0.013564  | -0.617464 |
| H | -5.491844 | -0.025425 | -0.814627 |
| H | -4.351538 | -0.759066 | -0.027908 |
| O | -3.042905 | -0.214041 | -2.969282 |
| H | -3.562811 | -0.155014 | -2.138657 |
| H | -2.498372 | -1.028720 | -2.898254 |
| O | -3.861454 | -2.052329 | 1.004283  |
| H | -3.311354 | -2.701782 | 0.470047  |
| H | -4.613637 | -2.553136 | 1.355304  |



|   |           |           |           |
|---|-----------|-----------|-----------|
| O | -2.377736 | -3.710058 | -0.408273 |
| H | -2.107496 | -3.286067 | -1.251530 |
| H | -1.539281 | -3.873759 | 0.090982  |
| O | 2.498703  | -1.097304 | 3.003172  |
| H | 1.589110  | -1.467589 | 2.979784  |
| H | 2.971754  | -1.468496 | 2.227233  |
| O | -2.326825 | -0.996803 | 3.082414  |
| H | -2.239027 | -0.025518 | 2.963034  |
| H | -2.867804 | -1.328220 | 2.332936  |
| O | 2.745969  | -0.351725 | -3.099379 |
| H | 3.228815  | -0.399015 | -3.938374 |
| H | 2.196931  | 0.481753  | -3.138293 |
| O | -1.470011 | 1.920653  | -3.142722 |
| H | -1.727102 | 2.382648  | -3.955177 |
| H | -2.049153 | 1.107578  | -3.093469 |
| O | -3.792364 | 2.380506  | 0.683607  |
| H | -4.088442 | 1.545818  | 0.262893  |
| H | -3.241823 | 2.126490  | 1.455489  |
| O | -2.052786 | 3.610452  | -1.002486 |
| H | -1.842148 | 2.991081  | -1.734417 |
| H | -2.699599 | 3.148142  | -0.414017 |
| O | 0.073099  | 4.393107  | 0.329306  |
| H | -0.748046 | 4.106111  | -0.174337 |
| H | 0.000393  | 5.351973  | 0.451174  |
| O | 2.196979  | 3.616881  | -1.161718 |
| H | 1.444165  | 3.961066  | -0.617822 |
| H | 2.615762  | 4.390836  | -1.567851 |
| O | 2.512498  | 1.549033  | 2.760442  |
| H | 3.022850  | 1.871127  | 3.519426  |
| H | 2.472073  | 0.555456  | 2.862872  |
| O | 4.502219  | -0.193493 | -0.914556 |
| H | 3.883463  | -0.246950 | -1.674863 |
| H | 4.304502  | 0.660264  | -0.457177 |
| O | 3.914484  | -2.110988 | 0.808397  |
| H | 4.156863  | -1.386968 | 0.156259  |
| H | 4.748684  | -2.519164 | 1.086424  |
| O | 3.945727  | 2.125846  | 0.426810  |
| H | 3.342913  | 2.670099  | -0.122507 |
| H | 3.450910  | 1.933314  | 1.252091  |
| O | 0.158653  | 3.037124  | 2.755211  |
| H | 0.165201  | 3.532606  | 1.907553  |
| H | 0.949608  | 2.455096  | 2.737989  |
| O | -2.170508 | 1.755056  | 2.862642  |
| H | -2.589598 | 2.113341  | 3.660310  |
| H | -1.273954 | 2.194473  | 2.809259  |
| O | 1.306323  | 1.873745  | -3.138566 |
| H | 0.327908  | 1.804855  | -3.103265 |
| H | 1.575735  | 2.490259  | -2.424315 |

**Table S42.** M06-2X/6-31+G\*/PCM optimized Cartesian coordinates of the  $C_3H_8@(H_2O)_{26}$   $5^{12}6^3$  propane-clathrate.

|   |          |          |           |
|---|----------|----------|-----------|
| O | 4.021664 | 1.899676 | -1.650444 |
| H | 4.754684 | 2.405028 | -2.032668 |
| H | 3.446595 | 2.558930 | -1.167765 |

|   |           |           |           |
|---|-----------|-----------|-----------|
| O | 2.319762  | 2.882606  | 2.326417  |
| H | 2.708301  | 3.596302  | 2.855188  |
| H | 1.403041  | 2.754318  | 2.675428  |
| O | 2.479963  | 3.622554  | -0.345019 |
| H | 2.353943  | 3.350516  | 0.589338  |
| H | 1.589497  | 3.696751  | -0.749507 |
| O | 3.892682  | 0.559608  | 2.571917  |
| H | 3.290184  | -0.184083 | 2.790106  |
| H | 3.326858  | 1.356091  | 2.497515  |
| O | 2.229100  | -1.586378 | 3.178044  |
| H | 2.208612  | -2.275235 | 2.452829  |
| H | 2.540733  | -2.044459 | 3.973451  |
| O | 2.401489  | -2.108600 | -2.862625 |
| H | 2.847525  | -2.566001 | -3.592132 |
| H | 2.994217  | -2.217282 | -2.076991 |
| O | 2.482705  | 0.601161  | -3.564558 |
| H | 2.411845  | -0.338443 | -3.295348 |
| H | 3.052420  | 1.036943  | -2.894588 |
| O | 3.971175  | -2.379019 | -0.662619 |
| H | 4.345017  | -1.494722 | -0.362313 |
| H | 4.730646  | -2.962565 | -0.811676 |
| O | 4.908310  | -0.050528 | 0.117988  |
| H | 4.602923  | 0.647685  | -0.501655 |
| H | 4.545565  | 0.190698  | 1.006164  |
| O | -0.112821 | -0.328367 | 3.882220  |
| H | 0.709552  | -0.753549 | 3.553171  |
| H | -0.071688 | 0.623736  | 3.647729  |
| O | 2.276289  | -3.418345 | 1.272591  |
| H | 1.408898  | -3.667758 | 0.884351  |
| H | 2.839079  | -3.083013 | 0.541715  |
| O | -2.325744 | 3.670301  | -0.465830 |
| H | -2.797625 | 4.515604  | -0.521879 |
| H | -2.872524 | 3.014277  | -0.991494 |
| O | -2.115066 | 0.607631  | -3.646718 |
| H | -2.487179 | 0.655857  | -4.540255 |
| H | -1.238965 | 1.091733  | -3.684884 |
| O | -0.000020 | -3.481865 | -2.450637 |
| H | 0.837205  | -2.984659 | -2.564333 |
| H | -0.013376 | -3.792582 | -1.519750 |
| O | -2.267841 | -2.055830 | -2.892502 |
| H | -2.095200 | -1.117455 | -3.121081 |
| H | -1.399616 | -2.501913 | -2.737123 |
| O | -3.930872 | -2.370453 | -0.891865 |
| H | -3.301620 | -2.249667 | -1.667514 |
| H | -4.602832 | -3.007172 | -1.179556 |
| O | -4.930681 | 0.048657  | -0.184335 |
| H | -4.625907 | -0.855771 | -0.448898 |
| H | -5.896044 | 0.047449  | -0.270490 |
| O | -2.392217 | -1.430835 | 3.141795  |
| H | -2.741460 | -1.828815 | 3.953937  |
| H | -1.508875 | -1.032832 | 3.391384  |
| O | -2.448306 | 2.913321  | 2.215108  |
| H | -2.377736 | 3.154734  | 1.266642  |
| H | -3.027546 | 2.112320  | 2.258547  |
| O | -0.143690 | 2.394395  | 3.368756  |
| H | -1.002330 | 2.611641  | 2.893676  |
| H | -0.209949 | 2.814612  | 4.240247  |
| O | -4.025347 | 0.693993  | 2.384401  |

|   |           |           |           |
|---|-----------|-----------|-----------|
| H | -4.362480 | 0.472934  | 1.490919  |
| H | -3.456729 | -0.063167 | 2.644586  |
| O | -2.408454 | -3.387336 | 1.193891  |
| H | -2.964390 | -3.029072 | 0.468296  |
| H | -2.345673 | -2.677148 | 1.870443  |
| O | -0.121393 | -4.292031 | 0.206198  |
| H | -0.174855 | -5.254893 | 0.302111  |
| H | -0.964330 | -3.926286 | 0.600546  |
| O | -3.752765 | 1.933983  | -1.853362 |
| H | -3.183387 | 1.444869  | -2.488669 |
| H | -4.162934 | 1.259712  | -1.269481 |
| O | 0.077397  | 3.907819  | -1.716679 |
| H | 0.076190  | 4.784936  | -2.129452 |
| H | -0.783905 | 3.834419  | -1.233845 |
| O | 0.142939  | 1.970599  | -3.731695 |
| H | 0.977433  | 1.447124  | -3.647835 |
| H | 0.154067  | 2.638756  | -3.014422 |
| C | -1.314411 | -0.067735 | 0.344185  |
| C | -0.054241 | -0.929758 | 0.404092  |
| C | 1.217063  | -0.082014 | 0.422013  |
| H | -2.224951 | -0.678111 | 0.319065  |
| H | -1.313620 | 0.569115  | -0.550676 |
| H | -1.377424 | 0.589236  | 1.221366  |
| H | -0.032219 | -1.614794 | -0.454470 |
| H | -0.085320 | -1.562560 | 1.302170  |
| H | 2.119424  | -0.700535 | 0.484477  |
| H | 1.218418  | 0.598213  | 1.284439  |
| H | 1.293285  | 0.533312  | -0.484312 |

**Table S42.** M06-2X/6-31+G\*/PCM optimized Cartesian coordinates of the  $C_3H_8@(H_2O)_{28}$  propane-clathrate.

|   |           |           |           |
|---|-----------|-----------|-----------|
| O | 2.792497  | -2.139914 | -3.242987 |
| H | 1.853131  | -2.338370 | -3.482091 |
| H | 3.339506  | -2.581546 | -3.910145 |
| O | -2.810323 | 3.022840  | -2.215907 |
| H | -3.021535 | 3.029499  | -1.258923 |
| H | -2.994957 | 2.111913  | -2.529724 |
| O | -2.597716 | -3.188996 | 2.188138  |
| H | -3.152354 | -3.860517 | 2.613906  |
| H | -2.786293 | -3.250972 | 1.218070  |
| O | 2.744457  | 2.379970  | 3.049877  |
| H | 1.793627  | 2.484838  | 3.266816  |
| H | 2.948580  | 1.422176  | 3.094436  |
| O | -0.936611 | 0.337253  | 4.168518  |
| H | -0.614337 | 1.231531  | 3.925369  |
| H | -0.177359 | -0.271863 | 4.055892  |
| O | 1.164203  | -1.503915 | 3.978851  |
| H | 1.365215  | -1.773889 | 4.888385  |
| H | 2.002098  | -1.113571 | 3.623192  |
| O | -0.968075 | -0.283779 | -4.388633 |
| H | -0.347182 | 0.470118  | -4.280646 |
| H | -1.785213 | -0.056843 | -3.893697 |
| O | -0.811576 | -3.995866 | -1.632676 |
| H | -0.086330 | -4.058786 | -0.972186 |

|   |           |           |           |
|---|-----------|-----------|-----------|
| H | -0.478077 | -3.450842 | -2.377726 |
| O | 1.157800  | -4.265583 | 0.293401  |
| H | 0.782404  | -4.024781 | 1.188298  |
| H | 1.374451  | -5.209235 | 0.344501  |
| O | 0.906045  | 4.515947  | -0.341779 |
| H | 1.744429  | 4.062496  | -0.035402 |
| H | 1.116935  | 5.460304  | -0.394549 |
| O | 4.296943  | 1.333384  | -0.955270 |
| H | 3.865926  | 1.089913  | -1.822397 |
| H | 5.199011  | 1.610496  | -1.175805 |
| O | 4.459377  | -0.885212 | 0.732336  |
| H | 4.374747  | -0.110278 | 0.135926  |
| H | 4.054479  | -1.649334 | 0.253892  |
| O | -4.478666 | 0.666055  | 1.174169  |
| H | -3.991583 | 0.195778  | 1.917129  |
| H | -5.392844 | 0.776794  | 1.477727  |
| O | 3.456331  | -3.009762 | -0.653928 |
| H | 3.210294  | -2.712351 | -1.554635 |
| H | 2.642326  | -3.401139 | -0.271658 |
| O | -3.402594 | 3.079203  | 0.519587  |
| H | -4.106784 | 3.724869  | 0.684234  |
| H | -3.769037 | 2.202926  | 0.798517  |
| O | -3.081179 | -3.298476 | -0.485003 |
| H | -2.226240 | -3.526745 | -0.955284 |
| H | -3.697094 | -4.019379 | -0.688244 |
| O | 3.119554  | 3.362239  | 0.532472  |
| H | 3.489664  | 2.643757  | -0.024152 |
| H | 2.995862  | 2.982603  | 1.436322  |
| O | 0.168467  | -2.596406 | -3.820318 |
| H | -0.283009 | -1.725100 | -4.022836 |
| H | 0.049023  | -3.151806 | -4.605738 |
| O | 0.054480  | 2.859883  | 3.607380  |
| H | -0.032936 | 3.432386  | 4.384171  |
| H | -0.380989 | 3.345350  | 2.850722  |
| O | -0.235894 | 3.736536  | -2.752960 |
| H | -1.163737 | 3.483058  | -2.526147 |
| H | 0.205885  | 3.968022  | -1.907869 |
| O | 0.099539  | -3.696647 | 2.656174  |
| H | -0.848825 | -3.488923 | 2.510982  |
| H | 0.493872  | -2.909011 | 3.089893  |
| O | 3.215164  | 0.616505  | -3.273220 |
| H | 3.042992  | -0.349317 | -3.282557 |
| H | 2.377665  | 1.053491  | -3.542578 |
| O | -3.233426 | -0.630055 | 3.087208  |
| H | -3.003270 | -1.530772 | 2.774017  |
| H | -2.396178 | -0.234314 | 3.432772  |
| O | 3.449913  | -0.330625 | 3.099978  |
| H | 4.183958  | -0.465403 | 3.718481  |
| H | 3.803870  | -0.569197 | 2.190750  |
| O | -3.334674 | 0.438810  | -3.131613 |
| H | -4.029493 | 0.474266  | -3.806270 |
| H | -3.711152 | -0.097407 | -2.378141 |
| O | 0.865115  | 1.794408  | -4.161726 |
| H | 1.023700  | 2.167400  | -5.042093 |
| H | 0.481326  | 2.538494  | -3.611134 |
| O | -4.400042 | -0.933221 | -1.117119 |
| H | -4.443385 | -0.388980 | -0.301379 |
| H | -3.893485 | -1.742679 | -0.890181 |

|   |           |           |           |
|---|-----------|-----------|-----------|
| O | -1.061421 | 4.158151  | 1.581541  |
| H | -0.406613 | 4.259937  | 0.856150  |
| H | -1.851228 | 3.717813  | 1.202732  |
| C | -1.126448 | 0.264338  | 0.208495  |
| C | -0.415819 | -0.950847 | 0.803766  |
| C | 1.101659  | -0.780522 | 0.814689  |
| H | -2.212458 | 0.126583  | 0.185342  |
| H | -0.790515 | 0.452924  | -0.819229 |
| H | -0.914631 | 1.165211  | 0.799549  |
| H | -0.680954 | -1.854285 | 0.236676  |
| H | -0.772832 | -1.111933 | 1.828698  |
| H | 1.607225  | -1.648433 | 1.253453  |
| H | 1.390389  | 0.105939  | 1.395941  |
| H | 1.492469  | -0.652512 | -0.203148 |

---

**Table S43.** M06-2X/6-31+G\*/PCM optimized Cartesian coordinates of the iso-C<sub>4</sub>H<sub>10</sub>@(H<sub>2</sub>O)<sub>26</sub> isobutane-clathrate.

|   |           |           |           |
|---|-----------|-----------|-----------|
| O | -3.892600 | -0.612890 | -2.452745 |
| H | -4.578127 | -0.757237 | -3.122155 |
| H | -3.363602 | -1.459025 | -2.405926 |
| O | -2.416926 | -3.847940 | 0.298666  |
| H | -2.803981 | -4.736587 | 0.319502  |
| H | -1.492458 | -3.945750 | 0.632021  |
| O | -2.490673 | -2.868351 | -2.306363 |
| H | -2.431409 | -3.197870 | -1.383895 |
| H | -1.571790 | -2.709075 | -2.610741 |
| O | -3.999625 | -1.969839 | 1.726329  |
| H | -3.377019 | -1.500007 | 2.322510  |
| H | -3.455439 | -2.615669 | 1.230782  |
| O | -2.266634 | -0.574827 | 3.399800  |
| H | -2.188553 | 0.390874  | 3.154918  |
| H | -2.589811 | -0.590999 | 4.313591  |
| O | -2.355945 | 3.644029  | -1.223419 |
| H | -2.874517 | 4.362639  | -1.616955 |
| H | -2.938620 | 3.237637  | -0.536053 |
| O | -2.338472 | 1.590130  | -3.135999 |
| H | -2.300169 | 2.275397  | -2.436907 |
| H | -2.911759 | 0.864039  | -2.809918 |
| O | -3.900773 | 2.388248  | 0.654366  |
| H | -4.272028 | 1.486031  | 0.415567  |
| H | -4.657547 | 2.924267  | 0.937172  |
| O | -4.883812 | 0.012180  | 0.048613  |
| H | -4.564115 | -0.235290 | -0.846859 |
| H | -4.575950 | -0.706980 | 0.652312  |
| O | 0.011977  | -2.112693 | 3.370244  |
| H | -0.795619 | -1.557141 | 3.299213  |
| H | -0.008050 | -2.762986 | 2.635731  |
| O | -2.213307 | 2.005452  | 2.808059  |
| H | -1.375092 | 2.493748  | 2.651377  |
| H | -2.789140 | 2.174098  | 2.030926  |
| O | 2.415944  | -2.863757 | -2.349894 |
| H | 2.882683  | -3.494548 | -2.919581 |
| H | 2.944646  | -2.012636 | -2.386997 |
| O | 2.229188  | 1.589329  | -3.090972 |

|   |           |           |           |
|---|-----------|-----------|-----------|
| H | 2.621529  | 1.956639  | -3.898111 |
| H | 1.355591  | 1.188794  | -3.374779 |
| O | 0.044449  | 4.689088  | -0.116087 |
| H | -0.766822 | 4.328715  | -0.530573 |
| H | 0.061120  | 4.305935  | 0.787141  |
| O | 2.335551  | 3.695004  | -1.288012 |
| H | 2.131911  | 2.973532  | -1.921831 |
| H | 1.479994  | 4.021867  | -0.919461 |
| O | 3.828477  | 2.521978  | 0.556402  |
| H | 3.268600  | 2.977566  | -0.140913 |
| H | 4.510298  | 3.161089  | 0.814678  |
| O | 4.894051  | 0.060466  | 0.013536  |
| H | 4.540190  | 0.963563  | 0.204754  |
| H | 5.858830  | 0.148800  | -0.014561 |
| O | 2.247740  | -0.704294 | 3.375544  |
| H | 2.565438  | -0.751125 | 4.290347  |
| H | 1.385184  | -1.210465 | 3.360357  |
| O | 2.487255  | -3.849270 | 0.257450  |
| H | 2.439024  | -3.498374 | -0.657884 |
| H | 3.040602  | -3.204116 | 0.762040  |
| O | 0.097234  | -4.057525 | 1.384727  |
| H | 0.978720  | -3.972290 | 0.913518  |
| H | 0.140504  | -4.897984 | 1.866991  |
| O | 3.997755  | -2.041259 | 1.671845  |
| H | 4.327914  | -1.335554 | 1.078654  |
| H | 3.387530  | -1.583028 | 2.290127  |
| O | 2.245848  | 1.996183  | 2.763619  |
| H | 2.825990  | 2.123775  | 1.982444  |
| H | 2.171810  | 1.028504  | 2.915306  |
| O | 0.085116  | 3.505285  | 2.441126  |
| H | 0.124653  | 4.154548  | 3.159852  |
| H | 0.879648  | 2.912807  | 2.563361  |
| O | 3.795976  | -0.611037 | -2.444681 |
| H | 3.232737  | 0.167058  | -2.656055 |
| H | 4.208581  | -0.411855 | -1.576517 |
| O | -0.013912 | -2.289845 | -3.416983 |
| H | -0.010196 | -2.694298 | -4.298275 |
| H | 0.851211  | -2.538828 | -3.004540 |
| O | -0.006765 | 0.463463  | -3.898892 |
| H | -0.845560 | 0.878744  | -3.579342 |
| H | -0.046348 | -0.488206 | -3.667951 |
| C | 1.258735  | -0.623284 | 0.277796  |
| C | -0.002767 | 0.149850  | 0.653743  |
| C | -1.256962 | -0.638949 | 0.286031  |
| C | -0.014100 | 1.513262  | -0.025475 |
| H | 2.165281  | -0.055080 | 0.525552  |
| H | 1.276155  | -0.826016 | -0.803352 |
| H | 1.310271  | -1.584102 | 0.801429  |
| H | -0.000070 | 0.308736  | 1.744155  |
| H | -2.167132 | -0.096426 | 0.571518  |
| H | -1.275619 | -1.617208 | 0.781434  |
| H | -1.295596 | -0.811800 | -0.799682 |
| H | -0.906316 | 2.086043  | 0.252391  |
| H | -0.013755 | 1.402487  | -1.120008 |
| H | 0.869184  | 2.096890  | 0.255363  |

---

**Table S44.** M06-2X/6-31+G\*/PCM optimized Cartesian coordinates of the iso-C<sub>4</sub>H<sub>10</sub>@(H<sub>2</sub>O)<sub>28</sub> isobutane-clathrate.

|   |           |           |           |
|---|-----------|-----------|-----------|
| O | -0.120106 | -0.267274 | 4.717493  |
| H | -0.736630 | -0.964576 | 4.381253  |
| H | -0.146720 | -0.323294 | 5.684601  |
| O | 1.495405  | -4.324545 | -1.673391 |
| H | 1.277893  | -3.678577 | -2.378017 |
| H | 0.669756  | -4.426464 | -1.153814 |
| O | -4.474729 | 0.991092  | -1.515134 |
| H | -5.375600 | 1.138519  | -1.841350 |
| H | -4.505424 | 0.153286  | -0.989338 |
| O | 3.167422  | 3.489683  | -1.342627 |
| H | 2.722832  | 3.023325  | -2.083161 |
| H | 2.445305  | 3.853907  | -0.788015 |
| O | -0.776906 | 2.692776  | -3.289653 |
| H | 0.172412  | 2.442209  | -3.300478 |
| H | -0.924715 | 3.192734  | -2.460021 |
| O | -1.291859 | 4.173433  | -0.971387 |
| H | -1.537743 | 5.061176  | -1.274823 |
| H | -0.449510 | 4.290310  | -0.462932 |
| O | -0.229782 | -3.853809 | 2.357306  |
| H | 0.713172  | -3.578081 | 2.339765  |
| H | -0.475650 | -4.079289 | 1.433032  |
| O | -3.785752 | -0.683149 | 2.410081  |
| H | -3.562840 | 0.271863  | 2.471657  |
| H | -3.029464 | -1.183931 | 2.784037  |
| O | -3.280484 | 2.037068  | 2.535438  |
| H | -3.395164 | 2.443588  | 1.630080  |
| H | -3.941169 | 2.459510  | 3.104895  |
| O | 4.275587  | -0.796977 | -1.112343 |
| H | 4.324768  | 0.074223  | -0.619788 |
| H | 5.176802  | -0.970851 | -1.424985 |
| O | 3.425126  | 1.563805  | 2.683237  |
| H | 3.074111  | 0.701784  | 3.044190  |
| H | 4.123118  | 1.843733  | 3.294419  |
| O | 1.386278  | 3.457659  | 2.645636  |
| H | 2.097676  | 2.781264  | 2.656371  |
| H | 0.578019  | 3.020208  | 3.007690  |
| O | -1.764359 | -1.762122 | -3.520201 |
| H | -2.040766 | -0.794383 | -3.529398 |
| H | -2.183454 | -2.157828 | -4.300762 |
| O | -0.795003 | 2.279423  | 3.767736  |
| H | -0.592886 | 1.379523  | 4.098346  |
| H | -1.643576 | 2.211316  | 3.281195  |
| O | 0.863746  | -2.430794 | -3.652305 |
| H | 0.974221  | -2.781453 | -4.549529 |
| H | -0.081247 | -2.141995 | -3.589886 |
| O | -4.461923 | -1.321040 | -0.057147 |
| H | -4.187328 | -1.098916 | 0.881117  |
| H | -5.351040 | -1.702578 | 0.007019  |
| O | 4.456831  | 1.547717  | 0.105709  |
| H | 4.061801  | 1.533706  | 1.004210  |
| H | 3.982545  | 2.252628  | -0.398827 |
| O | -1.771197 | -2.147835 | 3.651499  |
| H | -1.207809 | -2.787276 | 3.124311  |
| H | -2.213432 | -2.679284 | 4.331089  |

|   |           |           |           |
|---|-----------|-----------|-----------|
| O | 1.929478  | 2.124967  | -3.442765 |
| H | 2.242864  | 2.452679  | -4.299454 |
| H | 2.190033  | 1.160942  | -3.406118 |
| O | 3.425492  | -3.242295 | -0.057109 |
| H | 2.730857  | -3.603859 | -0.660017 |
| H | 3.671983  | -2.356444 | -0.397852 |
| O | -3.620460 | 3.088357  | 0.119483  |
| H | -3.904465 | 2.370802  | -0.486904 |
| H | -2.774649 | 3.438469  | -0.232908 |
| O | 2.464008  | -0.675184 | 3.739348  |
| H | 1.549259  | -0.557721 | 4.073259  |
| H | 2.466586  | -1.502305 | 3.209666  |
| O | -2.609934 | 0.719751  | -3.588132 |
| H | -3.255463 | 0.838759  | -2.859378 |
| H | -1.910244 | 1.406708  | -3.454973 |
| O | 1.105454  | 4.524160  | 0.261132  |
| H | 1.264137  | 5.471374  | 0.394448  |
| H | 1.189039  | 4.101332  | 1.168834  |
| O | -0.896882 | -4.589428 | -0.220664 |
| H | -1.209359 | -5.506803 | -0.228792 |
| H | -1.632175 | -4.042915 | -0.615396 |
| O | 2.437815  | -3.092850 | 2.387807  |
| H | 2.940836  | -3.734214 | 2.912177  |
| H | 2.822096  | -3.129869 | 1.463067  |
| O | -2.819691 | -3.148612 | -1.366644 |
| H | -2.458777 | -2.625219 | -2.115557 |
| H | -3.363988 | -2.528117 | -0.835792 |
| O | 2.721807  | -0.400737 | -3.362966 |
| H | 3.244622  | -0.577689 | -2.549987 |
| H | 2.028584  | -1.093507 | -3.416410 |
| C | -0.014049 | 0.066627  | -1.046838 |
| C | 0.968906  | 1.113547  | -0.526247 |
| C | -1.426456 | 0.351553  | -0.539592 |
| C | 0.435329  | -1.338707 | -0.652030 |
| H | -0.025898 | 0.128412  | -2.147300 |
| H | 1.980278  | 0.933117  | -0.908529 |
| H | 1.016185  | 1.090640  | 0.572226  |
| H | 0.670717  | 2.125538  | -0.826387 |
| H | -2.143065 | -0.387239 | -0.918271 |
| H | -1.763439 | 1.345377  | -0.856554 |
| H | -1.457627 | 0.318417  | 0.559017  |
| H | -0.245019 | -2.100093 | -1.052024 |
| H | 0.455774  | -1.448286 | 0.441933  |
| H | 1.442620  | -1.552348 | -1.027425 |

**Table S45.** M06-2X/6-31+G\*/PCM optimized Cartesian coordinates of the iso-C<sub>4</sub>H<sub>10</sub>@(H<sub>2</sub>O)<sub>30</sub>-C<sub>2v</sub> B isobutane-clathrate.

|   |           |           |           |
|---|-----------|-----------|-----------|
| O | -2.249781 | -1.923280 | -3.484652 |
| H | -2.620819 | -2.186063 | -4.340684 |
| H | -1.430758 | -1.389665 | -3.692092 |
| O | -1.959521 | 4.156504  | 1.695562  |
| H | -2.650988 | 3.484079  | 1.517955  |



|   |           |           |           |
|---|-----------|-----------|-----------|
| H | -1.240162 | 3.722576  | 2.202685  |
| O | -2.261556 | -0.792697 | 3.622354  |
| H | -2.621573 | -0.930197 | 4.512388  |
| H | -3.024567 | -0.448518 | 3.073899  |
| O | 4.627137  | -2.490436 | 0.269955  |
| H | 4.547550  | -2.028479 | -0.597035 |
| H | 3.850527  | -3.093771 | 0.320824  |
| O | 2.103027  | -1.054779 | 3.653718  |
| H | 2.379944  | -1.274895 | 4.557072  |
| H | 1.713543  | -1.889545 | 3.289016  |
| O | 1.054670  | -3.376986 | 2.707117  |
| H | 1.277111  | -4.069204 | 3.349582  |
| H | 0.052682  | -3.359628 | 2.666450  |
| O | -3.992779 | 2.126712  | -1.665606 |
| H | -4.780526 | 2.494774  | -2.094653 |
| H | -3.212755 | 2.627945  | -2.047421 |
| O | -4.698822 | -1.911966 | 0.181984  |
| H | -5.633457 | -2.168525 | 0.154629  |
| H | -4.516835 | -1.427398 | -0.677291 |
| O | -3.009671 | -4.032322 | 0.434748  |
| H | -3.508027 | -4.846910 | 0.602079  |
| H | -3.682702 | -3.313390 | 0.334438  |
| O | 4.359390  | 1.525466  | -1.650632 |
| H | 5.200001  | 1.872933  | -1.985344 |
| H | 4.389994  | 1.644701  | -0.656995 |
| O | 2.068768  | -2.222649 | -3.360757 |
| H | 1.680195  | -2.969574 | -2.840168 |
| H | 2.364821  | -2.614171 | -4.197005 |
| O | 0.998164  | -4.282923 | -1.938562 |
| H | 1.228412  | -5.126647 | -2.357190 |
| H | -0.002572 | -4.248529 | -1.922491 |
| O | 0.199931  | 3.191745  | 3.159230  |
| H | 0.125106  | 2.244685  | 3.479110  |
| H | 0.215697  | 3.739994  | 3.959201  |
| O | -1.647810 | -4.195081 | -2.008129 |
| H | -1.887389 | -3.378436 | -2.499564 |
| H | -2.087637 | -4.133065 | -1.133407 |
| O | 2.506763  | 3.683751  | 1.785495  |
| H | 2.977505  | 4.333064  | 2.330187  |
| H | 1.685367  | 3.458747  | 2.288406  |
| O | -4.335587 | -0.017061 | 2.186353  |
| H | -4.470615 | -0.669525 | 1.464891  |
| H | -4.251299 | 0.863965  | 1.761562  |
| O | 4.375081  | -1.206811 | -2.145685 |
| H | 4.304147  | -0.239017 | -2.001689 |
| H | 3.534783  | -1.498380 | -2.555364 |
| O | -4.206651 | -0.617675 | -2.056406 |
| H | -4.024588 | 0.339407  | -1.940582 |
| H | -3.463483 | -1.006000 | -2.568799 |
| O | 4.474501  | -0.579555 | 2.214260  |
| H | 4.512983  | -1.279452 | 1.516069  |
| H | 3.632830  | -0.725307 | 2.693215  |
| O | 2.349898  | 3.154973  | -2.672895 |
| H | 2.134356  | 3.772911  | -1.932366 |
| H | 3.030707  | 2.538490  | -2.326163 |
| O | -1.574910 | -3.321711 | 2.724174  |
| H | -1.860974 | -2.415729 | 2.976477  |
| H | -2.037108 | -3.551454 | 1.889595  |

|   |           |           |           |
|---|-----------|-----------|-----------|
| O | -0.046896 | -0.587609 | -4.085513 |
| H | 0.751876  | -1.063780 | -3.774039 |
| H | 0.058728  | 0.363686  | -3.866500 |
| O | 0.009630  | 0.726633  | 4.046960  |
| H | -0.808703 | 0.234323  | 3.816034  |
| H | 0.761925  | 0.129876  | 3.841085  |
| O | 2.449505  | -4.175157 | 0.446778  |
| H | 1.880613  | -3.880010 | 1.188414  |
| H | 1.888520  | -4.179089 | -0.356317 |
| O | -1.979900 | 3.530644  | -2.632771 |
| H | -1.617010 | 4.113488  | -1.929839 |
| H | -1.223678 | 3.019010  | -2.996142 |
| O | 0.156534  | 2.155935  | -3.757319 |
| H | 0.190309  | 2.462542  | -4.676591 |
| H | 0.999373  | 2.491667  | -3.332960 |
| O | -4.089210 | 2.491891  | 1.024401  |
| H | -4.072409 | 2.383708  | 0.039741  |
| H | -4.883024 | 3.012987  | 1.220646  |
| O | 4.452759  | 1.834592  | 0.976950  |
| H | 3.711771  | 2.381189  | 1.310060  |
| H | 4.420482  | 0.964216  | 1.448533  |
| O | -1.036898 | 5.149974  | -0.590516 |
| H | -1.333769 | 6.069521  | -0.660480 |
| H | -1.394802 | 4.801200  | 0.274085  |
| O | 1.739891  | 4.870612  | -0.639571 |
| H | 0.767351  | 4.992910  | -0.599455 |
| H | 1.999195  | 4.468645  | 0.216050  |
| C | -0.063174 | -0.641002 | 0.792396  |
| C | 1.434676  | -0.469525 | 0.538656  |
| C | -0.648046 | -1.726896 | -0.109726 |
| C | -0.804866 | 0.682597  | 0.596942  |
| H | -0.201790 | -0.958799 | 1.836870  |
| H | 1.865792  | 0.288598  | 1.203505  |
| H | 1.613864  | -0.151302 | -0.498452 |
| H | 1.979846  | -1.408690 | 0.698932  |
| H | -1.732626 | -1.818695 | 0.031061  |
| H | -0.199419 | -2.706657 | 0.097890  |
| H | -0.466051 | -1.490856 | -1.168003 |
| H | -1.868837 | 0.582607  | 0.846497  |
| H | -0.733419 | 1.011300  | -0.449409 |
| H | -0.380324 | 1.472704  | 1.227556  |

---

**Table S46.** M06-2X/6-31+G\*/PCM optimized Cartesian coordinates of the neo-C<sub>5</sub>H<sub>12</sub>@(H<sub>2</sub>O)<sub>28</sub> neopentane-clathrate.

|   |           |           |           |
|---|-----------|-----------|-----------|
| O | -3.292592 | -1.876585 | 2.763582  |
| H | -3.680660 | -1.624184 | 1.888130  |
| H | -4.033856 | -2.188774 | 3.304890  |
| O | 0.499956  | -2.713501 | -3.961449 |
| H | 1.115353  | -1.950947 | -3.995423 |
| H | -0.400332 | -2.327301 | -3.907693 |
| O | -1.331267 | 4.311186  | -1.286725 |
| H | -1.568730 | 5.215728  | -1.541242 |
| H | -2.081321 | 3.732659  | -1.575289 |

|   |           |           |           |
|---|-----------|-----------|-----------|
| O | 4.220506  | 0.143918  | 2.322462  |
| H | 4.304378  | 0.521276  | 1.420449  |
| H | 3.571027  | 0.703236  | 2.799519  |
| O | 3.030056  | 3.480774  | -0.316582 |
| H | 3.524218  | 2.632586  | -0.316549 |
| H | 2.599911  | 3.545636  | 0.561960  |
| O | 1.694207  | 3.689765  | 2.137647  |
| H | 1.974469  | 4.480863  | 2.622981  |
| H | 1.888783  | 2.923323  | 2.733410  |
| O | -3.163867 | -2.732102 | -1.409895 |
| H | -2.506263 | -3.339664 | -1.004921 |
| H | -2.733613 | -2.320592 | -2.192023 |
| O | -4.452952 | 1.641470  | 0.160300  |
| H | -3.959835 | 1.998393  | 0.931561  |
| H | -4.349100 | 0.666219  | 0.200888  |
| O | -2.997212 | 2.625447  | 2.321945  |
| H | -2.215743 | 3.169477  | 2.019773  |
| H | -3.526337 | 3.205270  | 2.890524  |
| O | 3.214239  | -3.036648 | -0.483647 |
| H | 3.182349  | -2.785023 | 0.486096  |
| H | 3.873687  | -3.743997 | -0.551731 |
| O | 0.870593  | -2.739669 | 3.510848  |
| H | 0.065854  | -3.158839 | 3.093040  |
| H | 1.080178  | -3.281662 | 4.286485  |
| O | 0.430930  | -0.128600 | 4.381511  |
| H | 0.573403  | -1.033997 | 4.030129  |
| H | -0.492536 | 0.123313  | 4.137380  |
| O | 0.776936  | 1.725509  | -4.099182 |
| H | 0.985385  | 2.415812  | -3.401554 |
| H | 0.846903  | 2.177939  | -4.953931 |
| O | -2.168661 | 0.442520  | 3.836395  |
| H | -2.588962 | -0.353265 | 3.447685  |
| H | -2.431222 | 1.202287  | 3.274290  |
| O | 2.279031  | -0.543892 | -4.067257 |
| H | 2.771012  | -0.561438 | -4.902542 |
| H | 1.762384  | 0.300118  | -4.073627 |
| O | -3.309414 | 2.605176  | -2.028682 |
| H | -3.741719 | 2.218120  | -1.211708 |
| H | -4.018534 | 3.030930  | -2.534492 |
| O | 3.214744  | -2.377852 | 2.064627  |
| H | 2.358710  | -2.466462 | 2.535484  |
| H | 3.533952  | -1.450909 | 2.189669  |
| O | -4.318210 | -1.141742 | 0.351512  |
| H | -3.850167 | -1.694798 | -0.340484 |
| H | -5.246706 | -1.421126 | 0.319777  |
| O | 4.516001  | 1.135389  | -0.269543 |
| H | 5.447329  | 1.364308  | -0.409681 |
| H | 4.312356  | 0.410968  | -0.926351 |
| O | 0.906562  | -4.070039 | -1.623637 |
| H | 0.762539  | -3.550100 | -2.451539 |
| H | 1.675807  | -3.663815 | -1.169495 |
| O | -0.974567 | 4.106108  | 1.458889  |
| H | -1.034965 | 4.164472  | 0.481747  |
| H | -0.049635 | 3.865547  | 1.680615  |
| O | -1.331425 | -3.851166 | 2.494600  |
| H | -2.036386 | -3.173012 | 2.573876  |
| H | -1.264271 | -4.052932 | 1.535396  |
| O | 1.167922  | 3.589915  | -2.294586 |

|   |           |           |           |
|---|-----------|-----------|-----------|
| H | 0.306156  | 3.831310  | -1.895519 |
| H | 1.825165  | 3.507636  | -1.560445 |
| O | 2.319703  | 1.593344  | 3.750097  |
| H | 2.682499  | 1.888607  | 4.599170  |
| H | 1.584379  | 0.946716  | 3.970039  |
| O | -2.064045 | -1.644539 | -3.693415 |
| H | -2.629047 | -1.898606 | -4.438940 |
| H | -2.020676 | -0.645690 | -3.707245 |
| O | -1.305460 | -4.426980 | -0.225909 |
| H | -1.539600 | -5.355359 | -0.376828 |
| H | -0.448334 | -4.274901 | -0.721738 |
| O | -1.892656 | 0.990752  | -3.809024 |
| H | -0.953267 | 1.274850  | -3.831102 |
| H | -2.344781 | 1.510157  | -3.110762 |
| O | 4.076190  | -0.861860 | -1.965922 |
| H | 3.759816  | -1.642729 | -1.459725 |
| H | 3.418184  | -0.707560 | -2.677449 |
| C | -0.067213 | -0.045005 | 0.024511  |
| C | 0.931726  | 0.758677  | 0.860512  |
| C | -1.312772 | 0.805291  | -0.231523 |
| C | -0.464581 | -1.309492 | 0.788338  |
| C | 0.563776  | -0.429979 | -1.315388 |
| H | 1.827191  | 0.162903  | 1.085441  |
| H | 0.478634  | 1.062144  | 1.813782  |
| H | 1.248216  | 1.665054  | 0.328653  |
| H | -2.042761 | 0.257699  | -0.843205 |
| H | -1.052506 | 1.732027  | -0.761656 |
| H | -1.797333 | 1.080094  | 0.713872  |
| H | -1.229345 | -1.874616 | 0.240583  |
| H | -0.871049 | -1.057776 | 1.777134  |
| H | 0.401974  | -1.968675 | 0.935810  |
| H | 1.441689  | -1.072539 | -1.169471 |
| H | 0.882142  | 0.465254  | -1.865600 |
| H | -0.154046 | -0.977372 | -1.940645 |

**Table S47.** M06-2X/6-31+G\*/PCM optimized Cartesian coordinates of the neo-C<sub>5</sub>H<sub>12</sub>@(H<sub>2</sub>O)<sub>30</sub>-C<sub>2v</sub> A neopentane-clathrate.

|   |           |           |           |
|---|-----------|-----------|-----------|
| O | -4.683649 | -2.185584 | -0.657147 |
| H | -4.571790 | -1.892789 | 0.271385  |
| H | -3.874240 | -2.710113 | -0.868718 |
| O | -2.465233 | -3.651008 | -1.279296 |
| H | -1.942201 | -3.859141 | -0.475933 |
| H | -1.884646 | -3.163268 | -1.898698 |
| O | -4.699311 | -0.020651 | -2.286491 |
| H | -4.669001 | -0.817629 | -1.697245 |
| H | -3.906951 | -0.066408 | -2.862291 |
| O | 1.490854  | -2.328719 | -3.358899 |
| H | 1.877914  | -2.762674 | -2.567608 |
| H | 1.945987  | -1.458932 | -3.473471 |
| O | -1.127205 | -2.387528 | -3.385726 |
| H | -1.319331 | -3.029748 | -4.087006 |
| H | -0.125183 | -2.319615 | -3.353475 |
| O | -2.455014 | -0.103854 | -3.969617 |

|   |           |           |           |
|---|-----------|-----------|-----------|
| H | -1.929251 | -0.924995 | -3.792112 |
| H | -2.717572 | -0.147115 | -4.901774 |
| O | 2.610248  | -3.691398 | -1.211296 |
| H | 2.983970  | -4.505235 | -1.582848 |
| H | 3.392592  | -3.147483 | -0.910098 |
| O | -4.593692 | 2.111658  | -0.767308 |
| H | -5.443326 | 2.570197  | -0.853379 |
| H | -4.644606 | 1.298982  | -1.360255 |
| O | 1.445158  | 2.413561  | -3.535536 |
| H | 0.448586  | 2.355898  | -3.515672 |
| H | 1.662289  | 2.968626  | -4.300119 |
| O | -1.215367 | 2.341016  | -3.540384 |
| H | -1.610235 | 1.447397  | -3.634173 |
| H | -1.612672 | 2.739154  | -2.736955 |
| O | -2.432870 | 3.609277  | -1.365577 |
| H | -2.720579 | 4.454384  | -1.745385 |
| H | -3.264187 | 3.101715  | -1.177861 |
| O | 2.819784  | 0.003092  | -3.799740 |
| H | 2.307672  | 0.830763  | -3.676803 |
| H | 3.576496  | 0.050697  | -3.178882 |
| O | -4.196431 | 1.377933  | 1.890037  |
| H | -4.304576 | 1.615277  | 0.943895  |
| H | -4.188254 | 0.396148  | 1.933469  |
| O | -4.304338 | -1.368379 | 1.999813  |
| H | -3.491446 | -1.811991 | 2.375296  |
| H | -5.044380 | -1.642186 | 2.562456  |
| O | -2.182712 | -2.606112 | 2.979639  |
| H | -1.802550 | -3.242826 | 2.334806  |
| H | -1.445057 | -2.068402 | 3.340848  |
| O | -2.299685 | 2.736768  | 3.136023  |
| H | -2.995792 | 2.177018  | 2.686962  |
| H | -2.773293 | 3.281493  | 3.783051  |
| O | -0.164555 | 1.467855  | 4.392518  |
| H | -0.938920 | 1.865413  | 3.937344  |
| H | 0.624557  | 1.851025  | 3.953242  |
| O | -0.117125 | -1.193062 | 4.185760  |
| H | -0.114892 | -1.489798 | 5.108747  |
| H | -0.139621 | -0.195614 | 4.225335  |
| O | 1.303532  | 4.123924  | 1.040323  |
| H | 0.302377  | 4.187847  | 1.031654  |
| H | 1.620386  | 5.026706  | 1.201373  |
| O | -1.318130 | 4.316334  | 1.080127  |
| H | -1.687080 | 3.764182  | 1.805172  |
| H | -1.722469 | 4.005511  | 0.240944  |
| O | 2.641697  | 3.602705  | -1.335187 |
| H | 2.036299  | 3.708290  | -0.570488 |
| H | 2.145404  | 3.155703  | -2.055908 |
| O | 1.364541  | -4.435152 | 1.173789  |
| H | 1.753128  | -4.139761 | 0.322148  |
| H | 1.604202  | -3.750338 | 1.845370  |
| O | -1.265682 | -4.425467 | 1.104713  |
| H | -1.573199 | -5.321186 | 1.310188  |
| H | -0.262885 | -4.462598 | 1.103373  |
| O | 2.021770  | -2.627658 | 3.101763  |
| H | 2.776295  | -2.075506 | 2.806385  |
| H | 1.309935  | -2.021214 | 3.393746  |
| O | 2.072912  | 2.631771  | 3.177012  |
| H | 1.766354  | 3.174738  | 2.406603  |

|   |           |           |           |
|---|-----------|-----------|-----------|
| H | 2.416672  | 3.268372  | 3.823083  |
| O | 4.304492  | 1.324716  | 2.131322  |
| H | 3.501852  | 1.751143  | 2.500791  |
| H | 4.414640  | 1.668173  | 1.218474  |
| O | 4.303786  | -1.325967 | 2.198477  |
| H | 4.292966  | -0.327354 | 2.191247  |
| H | 5.046971  | -1.583411 | 2.764591  |
| O | 4.729225  | 2.231932  | -0.473266 |
| H | 3.949657  | 2.757775  | -0.819618 |
| H | 5.492426  | 2.829216  | -0.494060 |
| O | 4.987604  | 0.018970  | -2.023110 |
| H | 5.836774  | 0.031727  | -2.489860 |
| H | 4.959505  | 0.841368  | -1.473021 |
| O | 4.673903  | -2.227334 | -0.400028 |
| H | 4.796598  | -1.431468 | -0.960818 |
| H | 4.552471  | -1.903556 | 0.519792  |
| C | -0.303777 | 0.628203  | 1.312557  |
| C | -0.346210 | -0.065986 | -0.050624 |
| C | 0.182893  | -1.495880 | 0.095057  |
| C | -1.793336 | -0.102895 | -0.553159 |
| C | 0.518535  | 0.706964  | -1.049953 |
| H | -0.641712 | 1.670512  | 1.236768  |
| H | -0.958642 | 0.114414  | 2.028216  |
| H | 0.714003  | 0.629949  | 1.725941  |
| H | 0.143417  | -2.034973 | -0.860876 |
| H | 1.226195  | -1.498414 | 0.438386  |
| H | -0.412021 | -2.056095 | 0.827248  |
| H | -1.862061 | -0.629091 | -1.513228 |
| H | -2.186665 | 0.913897  | -0.691893 |
| H | -2.446770 | -0.623593 | 0.159941  |
| H | 0.475629  | 0.245248  | -2.045484 |
| H | 1.570628  | 0.731220  | -0.733177 |
| H | 0.166537  | 1.742806  | -1.144004 |

---

**Table S48.** M06-2X/6-31+G\*/PCM optimized Cartesian coordinates of the neo-C<sub>5</sub>H<sub>12</sub>@(H<sub>2</sub>O)<sub>30</sub>-C<sub>2v</sub> B neopentane-clathrate.

|   |           |           |           |
|---|-----------|-----------|-----------|
| O | -1.447106 | -2.692464 | -3.540193 |
| H | -1.756919 | -3.242602 | -4.275656 |
| H | -0.878720 | -1.976522 | -3.948885 |
| O | -3.370918 | 3.082361  | 1.779693  |
| H | -3.785661 | 2.204930  | 1.634822  |
| H | -2.528154 | 2.936176  | 2.260879  |
| O | -1.741189 | -1.600063 | 4.031249  |
| H | -2.094846 | -1.826997 | 4.904766  |
| H | -2.527982 | -1.558875 | 3.415503  |
| O | 5.048625  | -0.571779 | 0.200877  |
| H | 4.774701  | -0.241503 | -0.685935 |
| H | 4.572776  | -1.425215 | 0.327791  |
| O | 2.437890  | -0.186541 | 3.748104  |
| H | 2.816164  | -0.230720 | 4.640392  |
| H | 2.401260  | -1.125288 | 3.434618  |
| O | 2.346802  | -2.783979 | 2.936966  |
| H | 2.877313  | -3.325616 | 3.541435  |

|   |           |           |           |
|---|-----------|-----------|-----------|
| H | 1.408815  | -3.133365 | 3.000286  |
| O | -4.595375 | 0.337628  | -1.522975 |
| H | -5.489522 | 0.366572  | -1.897071 |
| H | -4.082263 | 1.076186  | -1.970505 |
| O | -3.541464 | -3.493132 | 0.367752  |
| H | -4.278528 | -4.122579 | 0.376212  |
| H | -3.578915 | -3.024898 | -0.517658 |
| O | -1.095740 | -4.605416 | 0.682035  |
| H | -1.181790 | -5.566922 | 0.775518  |
| H | -2.018582 | -4.258971 | 0.582230  |
| O | 3.399541  | 2.920879  | -1.575356 |
| H | 3.985192  | 3.578498  | -1.980007 |
| H | 3.430228  | 3.093361  | -0.588796 |
| O | 2.673807  | -1.352136 | -3.695942 |
| H | 2.628488  | -2.129810 | -3.084377 |
| H | 3.203805  | -1.643488 | -4.453935 |
| O | 2.551809  | -3.442254 | -1.953990 |
| H | 3.054417  | -4.195996 | -2.300018 |
| H | 1.602138  | -3.754129 | -1.885540 |
| O | -0.969959 | 2.945685  | 3.184109  |
| H | -0.677797 | 2.056495  | 3.540301  |
| H | -1.153008 | 3.488270  | 3.967283  |
| O | 0.055667  | -4.268445 | -1.834864 |
| H | -0.518772 | -3.695458 | -2.388913 |
| H | -0.341076 | -4.312868 | -0.938843 |
| O | 0.944266  | 4.291602  | 1.770746  |
| H | 1.057707  | 5.122933  | 2.256459  |
| H | 0.290065  | 3.763614  | 2.291276  |
| O | -3.816224 | -1.610624 | 2.394286  |
| H | -3.717156 | -2.271574 | 1.675423  |
| H | -4.082527 | -0.770020 | 1.963900  |
| O | 4.328246  | 0.413064  | -2.262209 |
| H | 3.915449  | 1.280093  | -2.061802 |
| H | 3.668959  | -0.123494 | -2.747867 |
| O | -3.655154 | -2.230005 | -1.943088 |
| H | -3.911622 | -1.287628 | -1.844272 |
| H | -2.852309 | -2.269668 | -2.506431 |
| O | 4.400440  | 1.138596  | 2.218873  |
| H | 4.630008  | 0.517187  | 1.483848  |
| H | 3.694012  | 0.695899  | 2.732397  |
| O | 0.868586  | 3.294009  | -2.640857 |
| H | 0.451302  | 3.846379  | -1.934318 |
| H | 1.757936  | 3.062439  | -2.298166 |
| O | -0.126932 | -3.668564 | 3.120262  |
| H | -0.708058 | -2.935378 | 3.421165  |
| H | -0.466421 | -3.957070 | 2.245425  |
| O | 0.094280  | -0.818362 | -4.600349 |
| H | 1.007460  | -0.955162 | -4.265619 |
| H | -0.198497 | 0.059412  | -4.268824 |
| O | -0.164334 | 0.663282  | 4.227598  |
| H | -0.745609 | -0.122553 | 4.129323  |
| H | 0.743679  | 0.374055  | 3.990234  |
| O | 3.729255  | -2.951650 | 0.525733  |
| H | 3.119221  | -2.920420 | 1.291127  |
| H | 3.199353  | -3.121746 | -0.280593 |
| O | -3.279416 | 2.312989  | -2.647202 |
| H | -3.101859 | 2.970495  | -1.938249 |
| H | -2.408416 | 2.046084  | -3.015136 |

|   |           |           |           |
|---|-----------|-----------|-----------|
| O | -0.840437 | 1.676855  | -3.836260 |
| H | -0.944888 | 2.105099  | -4.700643 |
| H | -0.156451 | 2.227551  | -3.356625 |
| O | -4.685681 | 0.723157  | 1.166313  |
| H | -4.659810 | 0.597789  | 0.183845  |
| H | -5.620839 | 0.841235  | 1.393664  |
| O | 3.492115  | 3.398503  | 1.031387  |
| H | 2.590738  | 3.609443  | 1.351740  |
| H | 3.778529  | 2.570781  | 1.494223  |
| O | -2.910849 | 4.141975  | -0.606596 |
| H | -3.496216 | 4.908226  | -0.702694 |
| H | -3.100144 | 3.752742  | 0.294627  |
| O | -0.231613 | 4.841542  | -0.706307 |
| H | -1.183426 | 4.614158  | -0.631100 |
| H | 0.171553  | 4.638822  | 0.164101  |
| C | 0.190319  | 0.090120  | -0.032934 |
| C | 1.165357  | 1.062740  | 0.636742  |
| C | 0.819854  | -0.421135 | -1.331741 |
| C | -1.120502 | 0.822888  | -0.342157 |
| C | -0.082199 | -1.096277 | 0.897801  |
| H | 0.781321  | 1.408422  | 1.605781  |
| H | 1.327673  | 1.942968  | 0.000808  |
| H | 2.139946  | 0.587233  | 0.811096  |
| H | 0.152685  | -1.126020 | -1.845876 |
| H | 1.765559  | -0.939746 | -1.123204 |
| H | 1.034638  | 0.409894  | -2.017498 |
| H | -1.832945 | 0.164775  | -0.857923 |
| H | -0.934204 | 1.693775  | -0.984652 |
| H | -1.596221 | 1.180662  | 0.581054  |
| H | -0.783524 | -1.807013 | 0.438757  |
| H | -0.514667 | -0.759783 | 1.848508  |
| H | 0.846762  | -1.637276 | 1.122187  |

---

**Table S49.** M06-2X/6-31+G\*/PCM optimized Cartesian coordinates of the neo-C<sub>5</sub>H<sub>12</sub>@(H<sub>2</sub>O)<sub>30</sub>-4<sup>15</sup>1<sup>0</sup>6<sup>6</sup>-C<sub>2v</sub> neopentane-clathrate.

|   |           |           |           |
|---|-----------|-----------|-----------|
| O | -1.621765 | 4.406464  | 0.282017  |
| H | -0.641013 | 4.417431  | 0.281171  |
| H | -1.891825 | 3.896937  | 1.076780  |
| O | -3.859303 | -1.351805 | 2.163172  |
| H | -3.891112 | -1.820061 | 1.299810  |
| H | -4.011239 | -0.401383 | 1.972997  |
| O | 4.103658  | -1.091208 | 2.383151  |
| H | 4.957777  | -1.258449 | 2.810531  |
| H | 4.156489  | -1.533546 | 1.483478  |
| O | 4.105716  | 1.650445  | 1.894783  |
| H | 3.280619  | 2.099553  | 2.174819  |
| H | 4.007167  | 0.695656  | 2.094243  |
| O | 2.130967  | -1.965935 | 4.025011  |
| H | 2.841707  | -1.659322 | 3.407453  |
| H | 2.586362  | -2.335670 | 4.796512  |
| O | 1.634991  | -2.818382 | -3.448971 |
| H | 2.003169  | -3.397129 | -4.134037 |



|   |           |           |           |
|---|-----------|-----------|-----------|
| H | 2.047436  | -1.931679 | -3.594316 |
| O | 2.389802  | -3.831884 | -0.955418 |
| H | 2.065340  | -3.463217 | -1.803626 |
| H | 1.602546  | -3.975118 | -0.387996 |
| O | -4.427572 | 1.322566  | 1.666581  |
| H | -5.268450 | 1.528943  | 2.102876  |
| H | -4.576961 | 1.464942  | 0.680579  |
| O | -0.146795 | 2.215577  | 3.840942  |
| H | -0.989070 | 2.344056  | 3.357224  |
| H | -0.104695 | 1.273658  | 4.138158  |
| O | 0.180311  | -4.461207 | 0.602609  |
| H | 0.204463  | -5.428574 | 0.661661  |
| H | 0.161452  | -4.134714 | 1.546697  |
| O | 4.773929  | -0.256261 | -1.939912 |
| H | 4.735930  | 0.643193  | -1.491528 |
| H | 5.670640  | -0.348474 | -2.296296 |
| O | -2.463905 | 2.980161  | 2.512182  |
| H | -2.886477 | 3.609695  | 3.116852  |
| H | -3.180880 | 2.357442  | 2.228278  |
| O | -1.959046 | -3.961870 | -1.093667 |
| H | -1.202052 | -4.051141 | -0.476348 |
| H | -1.616972 | -3.573079 | -1.936268 |
| O | 1.931419  | 3.226870  | 2.602535  |
| H | 2.292561  | 3.860087  | 3.242255  |
| H | 1.143387  | 2.800931  | 3.056958  |
| O | -4.089183 | -2.677037 | -0.243128 |
| H | -4.804324 | -3.329110 | -0.193640 |
| H | -3.271757 | -3.177755 | -0.535511 |
| O | -1.982810 | -2.054072 | 3.893773  |
| H | -2.652746 | -1.765053 | 3.212016  |
| H | -2.492860 | -2.436874 | 4.623430  |
| O | 1.160176  | 4.541893  | 0.371116  |
| H | 1.380774  | 5.474424  | 0.522468  |
| H | 1.452664  | 4.058969  | 1.188298  |
| O | -0.001077 | -0.319979 | 4.789859  |
| H | -0.753420 | -0.869516 | 4.482996  |
| H | 0.804824  | -0.800691 | 4.509230  |
| O | 0.126762  | -3.677972 | 3.134019  |
| H | 0.891639  | -3.114697 | 3.378482  |
| H | -0.671830 | -3.148136 | 3.348985  |
| O | 4.328923  | -2.200719 | 0.009839  |
| H | 4.467396  | -1.522453 | -0.685261 |
| H | 3.591878  | -2.779967 | -0.305011 |
| O | -1.145151 | -2.934655 | -3.471175 |
| H | -1.533552 | -2.042405 | -3.599007 |
| H | -0.171580 | -2.823770 | -3.492866 |
| O | 4.628879  | 2.068557  | -0.732938 |
| H | 4.420598  | 1.925677  | 0.223997  |
| H | 3.900914  | 2.615399  | -1.097493 |
| O | -4.632827 | -0.724028 | -2.160148 |
| H | -4.438081 | -1.417451 | -1.493900 |
| H | -3.851379 | -0.685466 | -2.753240 |
| O | -4.770089 | 1.680757  | -0.908346 |
| H | -4.707599 | 0.803895  | -1.364098 |
| H | -4.031789 | 2.226970  | -1.257004 |
| O | -2.722811 | 3.307348  | -1.863380 |
| H | -3.130293 | 4.048727  | -2.336750 |
| H | -2.267764 | 3.708915  | -1.069603 |

|   |           |           |           |
|---|-----------|-----------|-----------|
| O | -2.470598 | -0.542801 | -3.903927 |
| H | -2.002464 | 0.337797  | -3.822549 |
| H | -2.810300 | -0.577702 | -4.811047 |
| O | 2.849152  | -0.407068 | -3.828398 |
| H | 3.584915  | -0.348605 | -3.164944 |
| H | 3.273887  | -0.382932 | -4.700019 |
| O | 2.557476  | 3.622311  | -1.777539 |
| H | 2.019159  | 3.959134  | -1.019704 |
| H | 2.916788  | 4.406368  | -2.220109 |
| O | -1.328222 | 1.834431  | -3.746592 |
| H | -1.718509 | 2.377552  | -3.028801 |
| H | -0.345874 | 1.872535  | -3.654911 |
| O | 1.380722  | 1.978089  | -3.689787 |
| H | 1.765397  | 2.529713  | -2.977128 |
| H | 1.864792  | 1.126867  | -3.678125 |
| C | -0.042723 | -0.718870 | 1.203137  |
| C | -0.220551 | 0.039859  | -0.117015 |
| C | 0.354485  | 1.455053  | 0.017027  |
| C | 0.502035  | -0.713101 | -1.239822 |
| C | -1.714875 | 0.129763  | -0.448227 |
| H | -0.461713 | -1.731124 | 1.128220  |
| H | 1.019088  | -0.810563 | 1.471077  |
| H | -0.555726 | -0.203174 | 2.025553  |
| H | 0.206643  | 2.028768  | -0.908362 |
| H | -0.140978 | 1.998133  | 0.833336  |
| H | 1.431958  | 1.429240  | 0.232969  |
| H | 0.342516  | -0.222473 | -2.209647 |
| H | 0.128241  | -1.742644 | -1.315505 |
| H | 1.584782  | -0.759464 | -1.055883 |
| H | -1.877763 | 0.666613  | -1.391239 |
| H | -2.261150 | 0.661995  | 0.342270  |
| H | -2.155773 | -0.871535 | -0.547589 |

---

**Table S50.** M06-2X/6-31+G\*/PCM optimized Cartesian coordinates of the cyc-C<sub>5</sub>H<sub>10</sub>@(H<sub>2</sub>O)<sub>28</sub> cyclopentane-clathrate.

|   |           |           |           |
|---|-----------|-----------|-----------|
| O | 3.947742  | -2.555905 | 0.969449  |
| H | 4.272793  | -1.651540 | 0.731963  |
| H | 4.725296  | -3.063672 | 1.246465  |
| O | -0.114596 | 3.696187  | 2.798609  |
| H | -0.867727 | 3.744305  | 2.172968  |
| H | 0.706124  | 3.733750  | 2.262313  |
| O | 0.293119  | 1.561393  | -4.327156 |
| H | 0.373535  | 1.835773  | -5.253229 |
| H | 1.123728  | 1.855824  | -3.876425 |
| O | -3.998332 | -2.572753 | 0.586461  |
| H | -4.245356 | -1.677711 | 0.269412  |
| H | -3.388317 | -2.959487 | -0.076848 |
| O | -3.759048 | 0.324213  | -2.723321 |
| H | -4.090510 | 0.278676  | -1.800707 |
| H | -3.247811 | -0.501547 | -2.856359 |
| O | -2.275118 | -2.005868 | -3.194936 |
| H | -2.682262 | -2.492618 | -3.928392 |
| H | -2.219566 | -2.650711 | -2.445369 |

|   |           |           |           |
|---|-----------|-----------|-----------|
| O | 3.713894  | 1.612028  | 2.165031  |
| H | 3.131236  | 1.132442  | 2.794424  |
| H | 3.193185  | 2.374943  | 1.831201  |
| O | 3.972391  | 0.176291  | -2.351942 |
| H | 3.447984  | -0.628397 | -2.562946 |
| H | 4.166879  | 0.136770  | -1.390392 |
| O | 2.462316  | -2.039248 | -3.056757 |
| H | 1.584508  | -1.731298 | -3.422246 |
| H | 2.903602  | -2.501053 | -3.786261 |
| O | -2.580431 | 0.173375  | 3.705240  |
| H | -2.542532 | -0.780774 | 3.400567  |
| H | -3.105509 | 0.174100  | 4.519944  |
| O | -0.183703 | -3.712282 | 2.606348  |
| H | 0.647576  | -3.181666 | 2.762267  |
| H | -0.174023 | -4.424704 | 3.263262  |
| O | -0.063335 | -4.700978 | 0.010398  |
| H | -0.103654 | -4.384143 | 0.938961  |
| H | 0.784579  | -4.348082 | -0.355165 |
| O | -1.349281 | 4.144556  | -1.360269 |
| H | -1.682767 | 3.475887  | -2.031361 |
| H | -1.549755 | 5.018172  | -1.730292 |
| O | 2.337734  | -3.830168 | -0.947629 |
| H | 2.896356  | -3.405427 | -0.264961 |
| H | 2.305984  | -3.187658 | -1.688875 |
| O | -2.356192 | 3.869026  | 1.135393  |
| H | -2.857295 | 4.669439  | 1.354248  |
| H | -2.046876 | 3.982943  | 0.201691  |
| O | 2.552337  | 2.303129  | -3.011221 |
| H | 3.094032  | 1.505073  | -2.736100 |
| H | 3.133660  | 2.844769  | -3.566763 |
| O | -2.570060 | -2.326102 | 2.887271  |
| H | -1.704128 | -2.770694 | 2.762492  |
| H | -3.071577 | -2.422613 | 2.040991  |
| O | 4.676402  | -0.017326 | 0.326548  |
| H | 4.279115  | 0.615229  | 0.996030  |
| H | 5.635975  | 0.114896  | 0.373620  |
| O | -4.738813 | 0.016392  | -0.145332 |
| H | -5.704993 | 0.092512  | -0.139993 |
| H | -4.407828 | 0.647480  | 0.555253  |
| O | -0.172971 | 1.423757  | 4.268446  |
| H | -0.176738 | 2.242292  | 3.712935  |
| H | -0.986891 | 0.926035  | 4.037691  |
| O | 0.195428  | -1.193498 | -4.122271 |
| H | 0.184278  | -0.214278 | -4.182902 |
| H | -0.662328 | -1.467416 | -3.731225 |
| O | 2.064611  | -2.374059 | 3.005241  |
| H | 2.724892  | -2.414607 | 2.281185  |
| H | 2.045948  | -1.444683 | 3.323837  |
| O | -2.104769 | 2.433277  | -3.199201 |
| H | -1.283306 | 2.072537  | -3.593406 |
| H | -2.690572 | 1.666275  | -2.982710 |
| O | -2.239952 | -3.816001 | -1.181828 |
| H | -2.674068 | -4.626863 | -1.489157 |
| H | -1.382868 | -4.112888 | -0.748715 |
| O | 2.262749  | 3.829636  | 1.351429  |
| H | 2.734137  | 4.648590  | 1.566611  |
| H | 1.983448  | 3.907991  | 0.395348  |
| O | 2.135329  | 0.207722  | 3.966182  |

|   |           |           |           |
|---|-----------|-----------|-----------|
| H | 2.553787  | 0.203112  | 4.840353  |
| H | 1.238559  | 0.642447  | 4.086593  |
| O | 1.432533  | 4.030219  | -1.151007 |
| H | 0.455262  | 4.001390  | -1.236814 |
| H | 1.803352  | 3.363996  | -1.768136 |
| O | -3.905675 | 1.650045  | 1.771034  |
| H | -3.409876 | 1.150709  | 2.456951  |
| H | -3.331229 | 2.395343  | 1.493778  |
| C | -0.719788 | 0.825332  | 0.357920  |
| C | -1.151839 | -0.305050 | -0.607092 |
| C | -0.027577 | -1.342448 | -0.509686 |
| C | 1.221016  | -0.459625 | -0.437527 |
| C | 0.815863  | 0.662618  | 0.536063  |
| H | -0.982924 | 1.811894  | -0.040305 |
| H | -1.229684 | 0.727610  | 1.323765  |
| H | -1.193126 | 0.077671  | -1.635986 |
| H | -2.142646 | -0.710779 | -0.371135 |
| H | -0.010052 | -2.046258 | -1.350291 |
| H | -0.128090 | -1.930565 | 0.414859  |
| H | 2.123303  | -0.997802 | -0.123783 |
| H | 1.415582  | -0.038899 | -1.434399 |
| H | 1.047600  | 0.363616  | 1.566189  |
| H | 1.360073  | 1.592912  | 0.343701  |

---

**Table S51.** M06-2X/6-31+G\*/PCM optimized Cartesian coordinates of the n-C<sub>4</sub>H<sub>10</sub>\_anti@(H<sub>2</sub>O)<sub>28</sub> 5<sup>12</sup>6<sup>4</sup>-D<sub>2</sub> n-butane-clathrate.

|   |           |           |          |
|---|-----------|-----------|----------|
| O | 2.846514  | 3.363663  | 1.540121 |
| H | 1.881113  | 3.534360  | 1.536231 |
| H | 2.995463  | 2.514198  | 2.007373 |
| O | 0.184562  | 4.158853  | 1.391764 |
| H | -0.506307 | 3.673070  | 1.926587 |
| H | 0.178269  | 5.072408  | 1.715804 |
| O | -1.710575 | 2.909680  | 2.750068 |
| H | -1.481428 | 1.992797  | 3.019833 |
| H | -2.504813 | 2.847999  | 2.176559 |
| O | 3.519228  | 0.990813  | 2.807477 |
| H | 4.031191  | 1.192595  | 3.605337 |
| H | 4.141804  | 0.500659  | 2.194735 |
| O | 1.333465  | -0.546745 | 3.541320 |
| H | 1.462830  | -1.433928 | 3.142786 |
| H | 2.075780  | 0.014747  | 3.226625 |
| O | -1.143592 | 0.361776  | 3.635213 |
| H | -1.266473 | 0.422589  | 4.595513 |
| H | -0.208309 | 0.030791  | 3.514592 |
| O | 4.008348  | -2.867879 | 0.963257 |
| H | 3.224419  | -2.974526 | 1.558091 |
| H | 4.617874  | -3.588065 | 1.185179 |
| O | 5.156249  | -0.328884 | 1.180841 |
| H | 5.128714  | 0.070398  | 0.275287 |
| H | 4.775082  | -1.227586 | 1.090752 |
| O | -3.940928 | 2.818240  | 1.099986 |
| H | -3.686625 | 2.963184  | 0.154067 |
| H | -4.569555 | 3.522039  | 1.321725 |

|   |           |           |           |
|---|-----------|-----------|-----------|
| O | -5.059812 | 0.278127  | 1.428194  |
| H | -4.685383 | 1.177169  | 1.314962  |
| H | -5.112844 | -0.096437 | 0.523989  |
| O | -3.299636 | -1.218199 | 2.886415  |
| H | -3.915170 | -0.653404 | 2.356817  |
| H | -2.505788 | -0.672166 | 3.075304  |
| O | -3.189688 | 3.164639  | -1.491281 |
| H | -3.694810 | 3.872985  | -1.919203 |
| H | -3.380020 | 2.330718  | -2.013481 |
| O | -0.581215 | 4.132636  | -1.263059 |
| H | -0.349665 | 4.124213  | -0.307665 |
| H | -1.460363 | 3.707748  | -1.351163 |
| O | 1.462911  | 3.184930  | -2.656281 |
| H | 0.669121  | 3.527539  | -2.155981 |
| H | 1.586137  | 3.780548  | -3.410549 |
| O | -3.701452 | 0.941253  | -2.823063 |
| H | -2.862416 | 0.487064  | -3.060902 |
| H | -4.196996 | 0.321736  | -2.244906 |
| O | -1.351242 | -0.329241 | -3.584245 |
| H | -1.456749 | -0.404750 | -4.545744 |
| H | -1.407266 | -1.266249 | -3.240196 |
| O | 1.272642  | 0.586480  | -3.535090 |
| H | 0.355747  | 0.251120  | -3.440066 |
| H | 1.285421  | 1.505153  | -3.187431 |
| O | -5.132422 | -0.789612 | -1.161031 |
| H | -4.684329 | -1.669819 | -1.133254 |
| H | -6.031014 | -0.951055 | -1.486820 |
| O | 5.089831  | 0.792206  | -1.306642 |
| H | 4.604755  | 1.648810  | -1.221647 |
| H | 4.536342  | 0.235513  | -1.892984 |
| O | 3.751102  | 3.162638  | -1.032466 |
| H | 2.951292  | 3.168206  | -1.598727 |
| H | 3.422690  | 3.239757  | -0.105028 |
| O | 3.490853  | -0.772465 | -3.020932 |
| H | 2.636793  | -0.292522 | -3.209295 |
| H | 3.919233  | -0.910468 | -3.879064 |
| O | -1.561103 | -2.827873 | -2.739945 |
| H | -2.289304 | -2.939611 | -2.092801 |
| H | -0.756068 | -3.216281 | -2.333339 |
| O | -3.718519 | -3.114222 | -0.999401 |
| H | -4.218879 | -3.914339 | -1.222175 |
| H | -3.390083 | -3.237945 | -0.070408 |
| O | 1.792441  | -3.079099 | 2.521455  |
| H | 1.048561  | -3.482846 | 1.983122  |
| H | 1.934453  | -3.673535 | 3.274210  |
| O | -0.106212 | -4.186872 | 1.073732  |
| H | -1.003166 | -3.809219 | 1.199321  |
| H | 0.110126  | -4.116280 | 0.117822  |
| O | -2.719816 | -3.351883 | 1.489975  |
| H | -3.129414 | -4.086948 | 1.972167  |
| H | -2.914155 | -2.523932 | 2.030373  |
| O | 0.632235  | -4.058698 | -1.588813 |
| H | 0.696648  | -4.958921 | -1.942108 |
| H | 1.555813  | -3.677217 | -1.637130 |
| O | 3.113368  | -3.137289 | -1.657398 |
| H | 3.446425  | -2.995980 | -0.745134 |
| H | 3.240089  | -2.290793 | -2.140542 |
| C | -1.900914 | 0.070823  | 0.125941  |

|   |           |           |           |
|---|-----------|-----------|-----------|
| C | -0.488126 | -0.504229 | 0.185449  |
| C | 0.585474  | 0.581484  | 0.263617  |
| C | 1.998033  | 0.019921  | 0.131805  |
| H | -2.660316 | -0.717370 | 0.057811  |
| H | -2.016339 | 0.726181  | -0.746208 |
| H | -2.120902 | 0.666704  | 1.020566  |
| H | -0.307457 | -1.127300 | -0.703802 |
| H | -0.389374 | -1.171639 | 1.055484  |
| H | 0.483279  | 1.122953  | 1.216594  |
| H | 0.411859  | 1.321837  | -0.532304 |
| H | 2.754519  | 0.806611  | 0.217719  |
| H | 2.132615  | -0.466165 | -0.842542 |
| H | 2.200236  | -0.730865 | 0.907032  |

---

**Table S52.** M06-2X/6-31+G\*/PCM optimized Cartesian coordinates of the n-C<sub>4</sub>H<sub>10</sub>\_anti@(H<sub>2</sub>O)<sub>30</sub> 5<sup>12</sup>6<sup>5</sup>-D<sub>5h</sub> n-butane-clathrate.

|   |           |           |           |
|---|-----------|-----------|-----------|
| O | 5.001488  | -2.272776 | -0.081439 |
| H | 5.813543  | -2.797155 | -0.158823 |
| H | 4.995155  | -1.642050 | -0.864797 |
| O | 2.760957  | -3.840008 | -0.132853 |
| H | 3.590159  | -3.302166 | -0.114130 |
| H | 3.044764  | -4.765004 | -0.193507 |
| O | -1.308531 | -3.532915 | 2.248980  |
| H | -1.516599 | -4.305838 | 2.795423  |
| H | -0.313699 | -3.481736 | 2.222634  |
| O | 1.352788  | -3.466339 | 2.248759  |
| H | 1.769848  | -2.698496 | 2.694007  |
| H | 1.821979  | -3.581488 | 1.395428  |
| O | 4.922196  | -0.806451 | 2.201100  |
| H | 5.725121  | -0.982692 | 2.715080  |
| H | 4.988652  | -1.360097 | 1.382187  |
| O | 2.607724  | -1.341954 | 3.547258  |
| H | 3.470010  | -1.172192 | 3.095501  |
| H | 2.830452  | -1.629347 | 4.446103  |
| O | 4.837144  | 1.885623  | 1.462298  |
| H | 4.011186  | 2.289065  | 1.810536  |
| H | 4.836912  | 0.947290  | 1.747160  |
| O | -1.393527 | 1.015738  | 3.803132  |
| H | -0.395821 | 1.023334  | 3.753882  |
| H | -1.607367 | 1.235051  | 4.723281  |
| O | 1.252945  | 1.079514  | 3.823820  |
| H | 1.716947  | 0.231300  | 3.662133  |
| H | 1.674560  | 1.755797  | 3.250268  |
| O | 2.496872  | 3.058116  | 2.352692  |
| H | 2.673853  | 3.814090  | 2.932770  |
| H | 1.994673  | 3.417959  | 1.564642  |
| O | -2.676791 | -1.417995 | 3.446730  |
| H | -2.135818 | -2.097223 | 2.991843  |
| H | -2.131474 | -0.605204 | 3.507499  |
| O | 4.849595  | 2.002663  | -1.175003 |
| H | 4.853434  | 1.970658  | -0.172540 |
| H | 5.642292  | 2.496718  | -1.435188 |
| O | -1.489140 | 3.907527  | 0.183273  |

|   |           |           |           |
|---|-----------|-----------|-----------|
| H | -1.711218 | 4.850568  | 0.230923  |
| H | -1.925086 | 3.492213  | 0.984257  |
| O | 1.251492  | 3.997100  | 0.231032  |
| H | 1.629365  | 3.642245  | -0.602171 |
| H | 0.278038  | 3.864046  | 0.198628  |
| O | 2.546909  | 3.140328  | -2.062278 |
| H | 3.405953  | 2.757915  | -1.751054 |
| H | 2.777125  | 3.938272  | -2.563270 |
| O | -2.719785 | 2.914776  | 2.296311  |
| H | -2.215551 | 2.227106  | 2.785108  |
| H | -3.537024 | 2.479179  | 1.965337  |
| O | 4.956332  | -0.606880 | -2.114022 |
| H | 4.145204  | -0.753764 | -2.650292 |
| H | 4.919726  | 0.322457  | -1.797624 |
| O | -1.287612 | 1.288373  | -3.776834 |
| H | -0.288745 | 1.293705  | -3.739942 |
| H | -1.512916 | 1.571016  | -4.676629 |
| O | 1.357424  | 1.346959  | -3.821922 |
| H | 1.786433  | 0.472742  | -3.695131 |
| H | 1.763018  | 1.959422  | -3.171504 |
| O | 2.668142  | -1.075933 | -3.592246 |
| H | 2.911609  | -1.360947 | -4.486201 |
| H | 2.180061  | -1.845980 | -3.180703 |
| O | -2.683623 | 3.080543  | -2.176462 |
| H | -2.193242 | 3.332173  | -1.364661 |
| H | -2.116396 | 2.452050  | -2.672146 |
| O | -1.284340 | -3.260017 | -2.480912 |
| H | -1.491806 | -3.985462 | -3.089775 |
| H | -1.720771 | -2.448975 | -2.870331 |
| O | 1.474198  | -3.168539 | -2.507869 |
| H | 1.845556  | -3.400662 | -1.630750 |
| H | 0.495202  | -3.155519 | -2.427018 |
| O | -2.674952 | -3.885703 | -0.148396 |
| H | -2.127373 | -3.641408 | -0.924289 |
| H | -2.125139 | -3.737729 | 0.649920  |
| O | -2.526197 | -1.170220 | -3.526491 |
| H | -3.367703 | -1.006493 | -3.045359 |
| H | -2.045870 | -0.313958 | -3.559069 |
| O | -4.977909 | -2.410323 | -0.113630 |
| H | -4.140545 | -2.933309 | -0.097035 |
| H | -4.993142 | -1.871643 | 0.715696  |
| O | -4.915700 | -0.802299 | -2.190410 |
| H | -4.957380 | -1.422282 | -1.399928 |
| H | -5.670264 | -1.025712 | -2.755481 |
| O | -4.974962 | 1.839376  | -1.354416 |
| H | -4.945605 | 0.911005  | -1.674015 |
| H | -4.146303 | 2.272860  | -1.673294 |
| O | -5.020841 | 1.765133  | 1.292186  |
| H | -5.817512 | 2.241041  | 1.571116  |
| H | -5.005338 | 1.805157  | 0.291160  |
| O | -5.034742 | -0.896797 | 2.151623  |
| H | -4.182260 | -1.061083 | 2.620256  |
| H | -5.021645 | 0.042718  | 1.871635  |
| C | -2.023854 | 0.363555  | 0.275212  |
| C | -0.538047 | 0.484005  | 0.611961  |
| C | 0.348260  | 0.581422  | -0.631547 |
| C | 1.839455  | 0.507143  | -0.303524 |
| H | -2.636070 | 0.285196  | 1.180401  |

|   |           |           |           |
|---|-----------|-----------|-----------|
| H | -2.374453 | 1.234895  | -0.291812 |
| H | -2.215021 | -0.530165 | -0.334332 |
| H | -0.227358 | -0.384217 | 1.212582  |
| H | -0.366752 | 1.368771  | 1.243802  |
| H | 0.129000  | 1.522737  | -1.158452 |
| H | 0.086057  | -0.226547 | -1.331079 |
| H | 2.456938  | 0.562085  | -1.207340 |
| H | 2.081329  | -0.435341 | 0.205278  |
| H | 2.139775  | 1.329327  | 0.358496  |

---

**Table S53.** M06-2X/6-31+G\*/PCM optimized Cartesian coordinates of the n-C<sub>4</sub>H<sub>10</sub>\_g<sup>-</sup>@(H<sub>2</sub>O)<sub>28</sub> 5<sup>12</sup>6<sup>4</sup>-T<sub>d</sub> n-butane-clathrate.

|   |           |           |           |
|---|-----------|-----------|-----------|
| O | 4.542965  | 0.432724  | 1.560409  |
| H | 3.923353  | 0.776210  | 2.252306  |
| H | 5.434098  | 0.514027  | 1.933383  |
| O | -2.412718 | -2.616705 | 2.857911  |
| H | -3.014752 | -2.290546 | 2.156580  |
| H | -2.076865 | -1.820717 | 3.323100  |
| O | -1.985950 | 4.412921  | -0.094601 |
| H | -2.363182 | 5.305608  | -0.106681 |
| H | -1.695761 | 4.247076  | 0.836993  |
| O | -0.012275 | -1.742425 | -4.140687 |
| H | -0.923776 | -1.523451 | -3.852012 |
| H | 0.510297  | -0.913407 | -4.135425 |
| O | -2.831311 | 1.401094  | -3.230067 |
| H | -2.789719 | 0.421661  | -3.199044 |
| H | -1.911844 | 1.703636  | -3.379891 |
| O | -0.246451 | 2.400149  | -3.734499 |
| H | -0.306600 | 2.885105  | -4.571978 |
| H | 0.473079  | 1.733949  | -3.863771 |
| O | 1.274681  | -0.728583 | 4.184383  |
| H | 1.453598  | -1.552706 | 3.679290  |
| H | 0.305674  | -0.573452 | 4.146786  |
| O | 1.489985  | 3.521283  | 2.297351  |
| H | 1.845334  | 3.624970  | 1.387105  |
| H | 1.885313  | 2.702993  | 2.667593  |
| O | 2.433832  | 3.908059  | -0.282708 |
| H | 1.627724  | 4.026110  | -0.860277 |
| H | 2.912550  | 4.749965  | -0.318449 |
| O | -0.855702 | -4.410869 | -0.824791 |
| H | -0.110219 | -4.053080 | -1.389849 |
| H | -0.919092 | -5.354928 | -1.035435 |
| O | 3.461606  | -2.407314 | -1.510168 |
| H | 3.599947  | -2.349133 | -0.522314 |
| H | 4.141644  | -3.017827 | -1.834061 |
| O | 3.811150  | 0.059004  | -2.780776 |
| H | 3.688389  | -0.794853 | -2.310955 |
| H | 3.951070  | 0.739861  | -2.077991 |
| O | -4.439571 | 0.948157  | 1.077499  |
| H | -4.211366 | 1.508457  | 0.276181  |
| H | -5.350688 | 1.179306  | 1.315097  |
| O | 4.298649  | 1.899883  | -0.824304 |
| H | 4.384038  | 1.413681  | 0.022133  |



|   |           |           |           |
|---|-----------|-----------|-----------|
| H | 3.595246  | 2.567863  | -0.681145 |
| O | -4.168514 | -1.758443 | 0.855440  |
| H | -5.048094 | -2.109267 | 1.064488  |
| H | -4.259288 | -0.773163 | 0.882070  |
| O | -1.131880 | 3.833272  | 2.418788  |
| H | -0.142674 | 3.681492  | 2.391258  |
| H | -1.276720 | 4.558459  | 3.045479  |
| O | 1.072691  | -3.511395 | -2.392517 |
| H | 1.867379  | -3.095261 | -1.994431 |
| H | 0.696470  | -2.849684 | -3.023128 |
| O | 2.751157  | 1.309763  | 3.405682  |
| H | 2.170882  | 0.542357  | 3.688592  |
| H | 3.193288  | 1.621380  | 4.210336  |
| O | -2.660615 | -1.367222 | -3.369178 |
| H | -3.206511 | -1.647070 | -4.119733 |
| H | -2.883661 | -1.991860 | -2.622002 |
| O | -0.365857 | -4.127163 | 1.894950  |
| H | -1.116053 | -3.573044 | 2.222404  |
| H | -0.486782 | -4.204546 | 0.923583  |
| O | 0.251379  | 4.272309  | -1.751487 |
| H | -0.548734 | 4.305374  | -1.184542 |
| H | 0.086541  | 3.583697  | -2.431160 |
| O | 3.911617  | -2.243064 | 1.100750  |
| H | 4.121375  | -1.309189 | 1.316494  |
| H | 3.152069  | -2.504222 | 1.666976  |
| O | -3.848222 | 2.514802  | -0.959273 |
| H | -3.187120 | 3.173975  | -0.659647 |
| H | -3.462304 | 2.077865  | -1.757770 |
| O | 1.645645  | 0.504461  | -4.219205 |
| H | 1.960342  | 0.589062  | -5.132170 |
| H | 2.465373  | 0.367650  | -3.655145 |
| O | -1.471025 | -0.376789 | 4.214848  |
| H | -1.773482 | -0.420553 | 5.134584  |
| H | -1.919885 | 0.421201  | 3.815337  |
| O | 1.872688  | -3.049012 | 2.789693  |
| H | 2.225699  | -3.709815 | 3.404720  |
| H | 1.042433  | -3.452180 | 2.398654  |
| O | -2.749350 | 1.699255  | 3.169758  |
| H | -3.327443 | 1.454014  | 2.415027  |
| H | -2.164954 | 2.425632  | 2.863938  |
| O | -3.244841 | -3.085197 | -1.422117 |
| H | -2.412158 | -3.547147 | -1.178390 |
| H | -3.536842 | -2.594776 | -0.624274 |
| C | -1.622043 | 0.020096  | -0.266456 |
| C | -0.818347 | -1.278216 | -0.264062 |
| C | 0.582378  | -1.153102 | 0.337788  |
| C | 1.451722  | -0.120781 | -0.378203 |
| H | -2.622855 | -0.142760 | -0.682799 |
| H | -1.145655 | 0.797142  | -0.875962 |
| H | -1.741046 | 0.414086  | 0.752411  |
| H | -0.726522 | -1.649760 | -1.295584 |
| H | -1.375016 | -2.041230 | 0.293981  |
| H | 1.072883  | -2.135492 | 0.287124  |
| H | 0.504341  | -0.902839 | 1.406960  |
| H | 2.489240  | -0.160486 | -0.029443 |
| H | 1.090166  | 0.901826  | -0.218334 |
| H | 1.455471  | -0.308852 | -1.460243 |

---

**Table S54.** M06-2X/6-31+G\*/PCM optimized Cartesian coordinates of the n-C<sub>4</sub>H<sub>10</sub>-g<sup>-</sup>@(H<sub>2</sub>O)<sub>30</sub> 5<sup>12</sup>6<sup>5</sup>-C<sub>2v</sub> B n-butane-clathrate.

|   |           |           |           |
|---|-----------|-----------|-----------|
| O | -1.219450 | -2.679906 | -3.563152 |
| H | -1.370906 | -3.034746 | -4.452188 |
| H | -0.707619 | -1.831576 | -3.686796 |
| O | -3.706182 | 2.738326  | 1.860057  |
| H | -4.014039 | 1.838926  | 1.617041  |
| H | -2.849262 | 2.633448  | 2.327836  |
| O | -1.863761 | -2.161220 | 3.637672  |
| H | -2.156390 | -2.409625 | 4.527436  |
| H | -2.684014 | -2.150431 | 3.066870  |
| O | 5.094296  | -0.371678 | 0.341813  |
| H | 4.874030  | 0.035378  | -0.527862 |
| H | 4.707204  | -1.277208 | 0.344727  |
| O | 2.238878  | -0.536277 | 3.726393  |
| H | 2.534489  | -0.548846 | 4.649641  |
| H | 2.345877  | -1.463262 | 3.394984  |
| O | 2.458643  | -3.062464 | 2.746108  |
| H | 2.925709  | -3.644703 | 3.364794  |
| H | 1.530124  | -3.427481 | 2.673631  |
| O | -4.536020 | 0.152558  | -1.664031 |
| H | -5.415443 | 0.186852  | -2.071197 |
| H | -4.047682 | 0.959107  | -2.003368 |
| O | -3.537786 | -3.904917 | -0.047466 |
| H | -4.232417 | -4.576732 | -0.123168 |
| H | -3.584612 | -3.355397 | -0.883861 |
| O | -1.040883 | -4.968378 | 0.250375  |
| H | -1.125048 | -5.932285 | 0.311142  |
| H | -1.961132 | -4.621797 | 0.137927  |
| O | 3.278752  | 3.260361  | -1.325381 |
| H | 3.840410  | 3.991010  | -1.626550 |
| H | 3.229655  | 3.348571  | -0.329407 |
| O | 2.869413  | -1.033083 | -3.302026 |
| H | 2.892591  | -1.904459 | -2.833852 |
| H | 3.267608  | -1.194354 | -4.171581 |
| O | 2.874291  | -3.435291 | -2.000248 |
| H | 3.407516  | -4.088862 | -2.478176 |
| H | 1.940959  | -3.794653 | -1.990517 |
| O | -1.261477 | 2.645008  | 3.189055  |
| H | -0.945168 | 1.711045  | 3.346795  |
| H | -1.450919 | 3.000794  | 4.071622  |
| O | 0.395801  | -4.376057 | -2.075411 |
| H | -0.193427 | -3.787437 | -2.596685 |
| H | -0.071355 | -4.558646 | -1.232696 |
| O | 0.582654  | 4.336968  | 2.076224  |
| H | 0.618774  | 5.086223  | 2.690410  |
| H | -0.038362 | 3.683853  | 2.482951  |
| O | -4.019026 | -2.184375 | 2.092599  |
| H | -3.872726 | -2.784233 | 1.329190  |
| H | -4.256370 | -1.308704 | 1.718746  |
| O | 4.508133  | 0.857199  | -2.054956 |
| H | 4.024179  | 1.678542  | -1.823101 |

|   |           |           |           |
|---|-----------|-----------|-----------|
| H | 3.860947  | 0.258792  | -2.482196 |
| O | -3.630304 | -2.422661 | -2.234432 |
| H | -3.853595 | -1.483629 | -2.059038 |
| H | -2.772529 | -2.438042 | -2.713366 |
| O | 4.007593  | 1.133683  | 2.330616  |
| H | 4.383871  | 0.577063  | 1.604602  |
| H | 3.346570  | 0.573427  | 2.785690  |
| O | 0.765063  | 3.815079  | -2.385520 |
| H | 0.274560  | 4.236977  | -1.637764 |
| H | 1.632784  | 3.533977  | -2.021873 |
| O | -0.017026 | -3.999589 | 2.657782  |
| H | -0.676370 | -3.352978 | 2.992420  |
| H | -0.355879 | -4.322364 | 1.795540  |
| O | 0.220964  | -0.492691 | -3.914436 |
| H | 1.150503  | -0.580320 | -3.614741 |
| H | -0.095287 | 0.410624  | -3.693878 |
| O | -0.432305 | 0.204217  | 3.769121  |
| H | -0.968099 | -0.612481 | 3.673366  |
| H | 0.510064  | -0.057866 | 3.696341  |
| O | 4.095493  | -2.945805 | 0.472047  |
| H | 3.446097  | -2.994954 | 1.203773  |
| H | 3.609477  | -3.163172 | -0.349999 |
| O | -3.334909 | 2.347176  | -2.520138 |
| H | -3.267726 | 2.979992  | -1.771235 |
| H | -2.425380 | 2.228574  | -2.872388 |
| O | -0.779311 | 2.054251  | -3.578645 |
| H | -0.832942 | 2.370423  | -4.493947 |
| H | -0.162062 | 2.691460  | -3.109669 |
| O | -4.780228 | 0.294034  | 1.046033  |
| H | -4.702356 | 0.251010  | 0.059685  |
| H | -5.728503 | 0.381233  | 1.229491  |
| O | 3.167781  | 3.499415  | 1.321470  |
| H | 2.262033  | 3.716931  | 1.624050  |
| H | 3.405818  | 2.623448  | 1.717691  |
| O | -3.239281 | 4.102773  | -0.374703 |
| H | -3.880413 | 4.825184  | -0.452097 |
| H | -3.457266 | 3.616673  | 0.470096  |
| O | -0.603795 | 5.025554  | -0.365697 |
| H | -1.527509 | 4.696410  | -0.337592 |
| H | -0.204476 | 4.802945  | 0.501582  |
| C | -0.871237 | 1.419729  | -0.024170 |
| C | 0.595281  | 1.633459  | 0.347239  |
| C | 1.562434  | 0.712923  | -0.397450 |
| C | 1.327066  | -0.773671 | -0.137371 |
| H | -1.503062 | 2.208683  | 0.398465  |
| H | -1.252705 | 0.459235  | 0.342857  |
| H | -0.997562 | 1.437715  | -1.114425 |
| H | 0.730691  | 1.497114  | 1.431649  |
| H | 0.865490  | 2.673168  | 0.129948  |
| H | 2.588259  | 0.964583  | -0.100485 |
| H | 1.490806  | 0.917091  | -1.477650 |
| H | 2.090788  | -1.382734 | -0.632593 |
| H | 0.347821  | -1.103712 | -0.504066 |
| H | 1.375545  | -0.991085 | 0.938516  |

---

**Table S55.** M06-2X/6-31+G\*/PCM optimized Cartesian coordinates of the n-C<sub>5</sub>H<sub>12</sub>\_anti/anti@(H<sub>2</sub>O)<sub>30</sub> 5<sup>12</sup>6<sup>5</sup>-D<sub>5h</sub> n-pentane-clathrate.

|   |           |           |           |
|---|-----------|-----------|-----------|
| O | 5.046428  | -1.095838 | -1.993940 |
| H | 5.827307  | -1.303549 | -2.530332 |
| H | 4.949443  | -0.096492 | -2.010022 |
| O | 2.725388  | -2.117078 | -3.009061 |
| H | 3.593051  | -1.772026 | -2.682627 |
| H | 2.921351  | -2.608199 | -3.821951 |
| O | -1.128304 | -3.966767 | -1.189739 |
| H | -1.287160 | -4.893633 | -1.424987 |
| H | -0.138023 | -3.864627 | -1.163080 |
| O | 1.534694  | -3.825884 | -1.158018 |
| H | 2.007410  | -3.690478 | -0.309673 |
| H | 1.945449  | -3.213943 | -1.804894 |
| O | 5.230537  | -1.981114 | 0.592099  |
| H | 6.061941  | -2.470173 | 0.692628  |
| H | 5.201210  | -1.677418 | -0.349262 |
| O | 3.013218  | -3.497790 | 1.193739  |
| H | 3.824987  | -2.976269 | 0.982271  |
| H | 3.324348  | -4.365652 | 1.494017  |
| O | 5.113214  | 0.281203  | 2.264589  |
| H | 4.266122  | 0.223521  | 2.760405  |
| H | 5.161588  | -0.526433 | 1.710483  |
| O | -1.093865 | -2.304938 | 3.287138  |
| H | -0.099052 | -2.268777 | 3.224862  |
| H | -1.284041 | -2.848428 | 4.067201  |
| O | 1.563765  | -2.267988 | 3.247147  |
| H | 2.042210  | -2.689527 | 2.502400  |
| H | 1.958231  | -1.376735 | 3.369423  |
| O | 2.718710  | 0.208635  | 3.669205  |
| H | 2.915158  | 0.283165  | 4.615726  |
| H | 2.139505  | 0.992676  | 3.449832  |
| O | -2.434458 | -3.629181 | 1.242188  |
| H | -1.918365 | -3.683042 | 0.410442  |
| H | -1.887506 | -3.136509 | 1.889372  |
| O | 4.854046  | 2.375506  | 0.653757  |
| H | 4.974213  | 1.596917  | 1.272423  |
| H | 5.612385  | 2.961022  | 0.803069  |
| O | -1.492920 | 2.369843  | 3.101634  |
| H | -1.696965 | 2.918138  | 3.875154  |
| H | -1.861317 | 1.463876  | 3.312512  |
| O | 1.273379  | 2.369327  | 3.146899  |
| H | 1.627284  | 2.868486  | 2.380508  |
| H | 0.297332  | 2.322464  | 3.045923  |
| O | 2.490681  | 3.697206  | 1.040781  |
| H | 3.350705  | 3.229082  | 0.900659  |
| H | 2.720366  | 4.603156  | 1.298739  |
| O | -2.547471 | 0.021381  | 3.696990  |
| H | -2.006601 | -0.772619 | 3.494719  |
| H | -3.399515 | -0.072398 | 3.215983  |
| O | 4.763817  | 1.529798  | -1.991327 |
| H | 3.903609  | 1.815955  | -2.371999 |
| H | 4.788690  | 1.863120  | -1.068171 |
| O | -1.719058 | 3.805100  | -1.311024 |
| H | -0.724053 | 3.755331  | -1.276038 |
| H | -1.925932 | 4.693509  | -1.639190 |

|   |           |           |           |
|---|-----------|-----------|-----------|
| O | 0.946129  | 3.827939  | -1.292176 |
| H | 1.407170  | 3.264182  | -1.950620 |
| H | 1.444756  | 3.728190  | -0.454353 |
| O | 2.362366  | 2.315283  | -3.137693 |
| H | 2.528781  | 2.820374  | -3.948006 |
| H | 1.890695  | 1.479171  | -3.416913 |
| O | -3.087994 | 3.442745  | 1.081821  |
| H | -2.495224 | 3.042157  | 1.753058  |
| H | -2.559944 | 3.530521  | 0.259921  |
| O | -1.565558 | -0.075300 | -3.777859 |
| H | -1.736680 | -0.066286 | -4.732453 |
| H | -2.086718 | 0.694680  | -3.409347 |
| O | 1.186992  | 0.056743  | -3.826867 |
| H | 1.630887  | -0.732194 | -3.451536 |
| H | 0.221329  | -0.022806 | -3.668613 |
| O | -2.702879 | -2.457548 | -2.932268 |
| H | -2.244169 | -1.629800 | -3.191326 |
| H | -2.099662 | -2.934800 | -2.324490 |
| O | -3.026349 | 1.954737  | -2.908523 |
| H | -3.820295 | 1.612325  | -2.441168 |
| H | -2.568567 | 2.574561  | -2.300013 |
| O | -5.066707 | -1.735130 | -1.731076 |
| H | -4.217007 | -2.002964 | -2.155006 |
| H | -4.993226 | -2.003574 | -0.781147 |
| O | -5.310283 | 0.890061  | -1.765365 |
| H | -5.219331 | -0.111201 | -1.760633 |
| H | -6.084173 | 1.091489  | -2.312560 |
| O | -5.361217 | 1.967882  | 0.796444  |
| H | -5.387843 | 1.613359  | -0.118879 |
| H | -4.538948 | 2.513368  | 0.859942  |
| O | -4.984537 | -0.108290 | 2.399229  |
| H | -5.718184 | -0.124574 | 3.031950  |
| H | -5.140831 | 0.683201  | 1.805669  |
| O | -4.878127 | -2.447895 | 0.884245  |
| H | -3.984132 | -2.842349 | 1.020145  |
| H | -4.900482 | -1.625905 | 1.417856  |
| C | -2.413678 | -0.045830 | -0.054689 |
| C | -1.081231 | 0.688920  | -0.178147 |
| C | 0.121261  | -0.237358 | -0.014963 |
| C | 1.455939  | 0.493339  | -0.144885 |
| C | 2.649965  | -0.419242 | 0.105433  |
| H | -3.265501 | 0.638352  | -0.137411 |
| H | -2.489776 | -0.557694 | 0.913683  |
| H | -2.518553 | -0.806906 | -0.838649 |
| H | -1.021978 | 1.485359  | 0.578392  |
| H | -1.019858 | 1.187632  | -1.156047 |
| H | 0.071357  | -1.041018 | -0.767558 |
| H | 0.070525  | -0.731680 | 0.968865  |
| H | 1.479498  | 1.332169  | 0.564731  |
| H | 1.530393  | 0.933745  | -1.148463 |
| H | 3.596151  | 0.114560  | -0.024664 |
| H | 2.643947  | -1.269988 | -0.587365 |
| H | 2.627597  | -0.819304 | 1.126234  |

---

**Table S56.** M06-2X/6-31+G\*/PCM optimized Cartesian

coordinates of the n-C<sub>5</sub>H<sub>12</sub>\_anti/anti@ (H<sub>2</sub>O)<sub>32</sub> 5<sup>12</sup>6<sup>6</sup>-D<sub>3d</sub>  
n-pentane-clathrate.

|   |           |           |           |
|---|-----------|-----------|-----------|
| O | 1.157095  | 4.158003  | -0.213481 |
| H | 2.027471  | 3.888848  | -0.595632 |
| H | 1.212875  | 5.120401  | -0.106940 |
| O | -1.278208 | 3.894969  | -1.579348 |
| H | -1.236923 | 3.257201  | -2.336521 |
| H | -0.410905 | 3.870423  | -1.125916 |
| O | -3.610872 | 2.812766  | 2.321204  |
| H | -3.553995 | 3.136500  | 1.387512  |
| H | -4.008042 | 3.536148  | 2.829876  |
| O | 1.146161  | 3.277510  | 2.426384  |
| H | 1.073155  | 3.506892  | 1.476438  |
| H | 0.300062  | 2.847753  | 2.703060  |
| O | -1.118428 | 2.176932  | 3.399805  |
| H | -1.104289 | 1.199963  | 3.490669  |
| H | -1.977779 | 2.406079  | 2.987867  |
| O | -3.541517 | 3.674675  | -0.254823 |
| H | -3.947843 | 4.551874  | -0.328234 |
| H | -2.648486 | 3.746844  | -0.705755 |
| O | 3.502849  | -2.694504 | -2.397534 |
| H | 3.444486  | -3.006081 | -1.460483 |
| H | 4.073857  | -1.897336 | -2.396646 |
| O | 1.219532  | -2.068629 | -3.530662 |
| H | 1.336128  | -2.231342 | -4.479151 |
| H | 2.081679  | -2.335955 | -3.088768 |
| O | -1.120497 | -4.250820 | -0.035589 |
| H | -1.048735 | -3.855937 | -0.930721 |
| H | -1.910830 | -3.849515 | 0.387841  |
| O | 3.475503  | -3.617564 | 0.154005  |
| H | 3.975152  | -2.993956 | 0.721610  |
| H | 2.599303  | -3.738087 | 0.577616  |
| O | 1.047356  | -4.043335 | 1.466366  |
| H | 1.100503  | -4.898222 | 1.920111  |
| H | 0.233822  | -4.091305 | 0.886270  |
| O | -1.009208 | -3.316648 | -2.648179 |
| H | -0.177696 | -2.868704 | -2.946921 |
| H | -1.092430 | -4.110233 | -3.199066 |
| O | 3.646954  | 3.503568  | -1.161206 |
| H | 4.102836  | 4.322471  | -1.410769 |
| H | 4.187167  | 3.098197  | -0.412331 |
| O | 0.943750  | 0.653172  | -3.014169 |
| H | 1.022024  | -0.304711 | -3.203379 |
| H | 1.845193  | 1.023536  | -3.097352 |
| O | -3.557034 | 0.670242  | -3.631648 |
| H | -3.991068 | 0.701056  | -4.497350 |
| H | -3.451130 | -0.298835 | -3.408405 |
| O | -1.208640 | 2.175168  | -3.669517 |
| H | -2.009448 | 1.609608  | -3.655604 |
| H | -0.443652 | 1.579007  | -3.493429 |
| O | -3.394156 | -1.899116 | -3.027690 |
| H | -2.526897 | -2.327225 | -2.871808 |
| H | -3.963378 | -2.103743 | -2.244938 |
| O | 3.533751  | 1.710866  | -3.176130 |
| H | 3.735357  | 2.135541  | -4.023790 |
| H | 3.604265  | 2.414885  | -2.481849 |
| O | 3.360119  | -0.594045 | 3.470517  |

|   |           |           |           |
|---|-----------|-----------|-----------|
| H | 3.657790  | -0.723148 | 4.384529  |
| H | 3.333975  | 0.387299  | 3.327301  |
| O | 3.396467  | 2.061742  | 2.994119  |
| H | 2.513285  | 2.495925  | 2.788170  |
| H | 3.768888  | 2.551001  | 3.743789  |
| O | -3.457416 | -3.362260 | 1.153757  |
| H | -3.869639 | -4.157606 | 1.524478  |
| H | -3.474097 | -2.678450 | 1.888196  |
| O | -1.140027 | -0.549480 | 3.856223  |
| H | -0.349139 | -1.100291 | 3.595136  |
| H | -1.177743 | -0.604807 | 4.823855  |
| O | 0.984105  | -2.045481 | 3.378668  |
| H | 1.807988  | -1.522864 | 3.290901  |
| H | 0.985107  | -2.723708 | 2.668271  |
| O | -3.582367 | -1.593397 | 3.099216  |
| H | -2.698501 | -1.217020 | 3.303422  |
| H | -4.158533 | -0.828793 | 2.852438  |
| O | -5.213231 | 0.506110  | 2.465015  |
| H | -4.663511 | 1.315359  | 2.404608  |
| H | -5.552081 | 0.347226  | 1.557529  |
| O | -5.033096 | -2.426036 | -0.927110 |
| H | -4.494811 | -2.756696 | -0.175233 |
| H | -5.437217 | -1.583973 | -0.625468 |
| O | -5.121086 | 1.886286  | -1.698605 |
| H | -4.550655 | 1.471338  | -2.383318 |
| H | -4.548655 | 2.504032  | -1.194500 |
| O | -6.120122 | 0.003606  | -0.118274 |
| H | -5.763853 | 0.718907  | -0.719077 |
| H | -7.085337 | 0.036008  | -0.196176 |
| O | 6.154558  | 0.076029  | 0.023354  |
| H | 5.817991  | -0.115429 | -0.877323 |
| H | 5.780322  | -0.621542 | 0.602038  |
| O | 5.050293  | 2.448931  | 0.781836  |
| H | 5.433840  | 1.576140  | 0.517043  |
| H | 4.475285  | 2.281336  | 1.559195  |
| O | 5.111337  | -0.415187 | -2.520819 |
| H | 5.797564  | -0.516137 | -3.198016 |
| H | 4.566570  | 0.362838  | -2.794150 |
| O | 5.006281  | -1.849347 | 1.690994  |
| H | 5.666207  | -2.337869 | 2.206500  |
| H | 4.434256  | -1.385053 | 2.349657  |
| C | -2.440988 | 0.109053  | 0.447824  |
| C | -1.206015 | -0.774829 | 0.283814  |
| C | 0.102830  | 0.013691  | 0.353748  |
| C | 1.329470  | -0.828217 | 0.007274  |
| C | 2.627341  | -0.023971 | 0.014680  |
| H | -3.368958 | -0.471227 | 0.378752  |
| H | -2.471021 | 0.885689  | -0.328284 |
| H | -2.437057 | 0.611177  | 1.423069  |
| H | -1.258028 | -1.300234 | -0.681843 |
| H | -1.200693 | -1.556225 | 1.058813  |
| H | 0.219168  | 0.437264  | 1.364235  |
| H | 0.052026  | 0.864080  | -0.342510 |
| H | 1.185933  | -1.277871 | -0.985536 |
| H | 1.409073  | -1.663690 | 0.714970  |
| H | 3.488516  | -0.650384 | -0.244125 |
| H | 2.817311  | 0.413576  | 1.003518  |
| H | 2.579137  | 0.799587  | -0.709446 |

**Table S57.** M06-2X/6-31+G\*/PCM optimized Cartesian coordinates of the n-C<sub>5</sub>H<sub>12</sub>\_g<sup>-</sup>/g<sup>-</sup>@(H<sub>2</sub>O)<sub>30</sub> 5<sup>12</sup>6<sup>5</sup>-C<sub>2v</sub> A n-pentane-clathrate.

|   |           |           |           |
|---|-----------|-----------|-----------|
| O | 5.045733  | -1.676795 | 0.255897  |
| H | 4.803367  | -1.322972 | -0.625597 |
| H | 4.353103  | -2.341460 | 0.485959  |
| O | 3.149665  | -3.543413 | 0.926640  |
| H | 2.564088  | -3.643142 | 0.145706  |
| H | 2.593464  | -3.203614 | 1.658434  |
| O | 4.904238  | 0.350506  | 2.048626  |
| H | 4.948565  | -0.398762 | 1.400844  |
| H | 4.142075  | 0.164917  | 2.636764  |
| O | -0.848840 | -2.965143 | 3.246246  |
| H | -1.171420 | -3.345005 | 2.400003  |
| H | -1.344225 | -2.119933 | 3.367211  |
| O | 1.763955  | -2.633000 | 3.188038  |
| H | 2.081231  | -3.222236 | 3.890261  |
| H | 0.763913  | -2.731189 | 3.184673  |
| O | 2.706234  | -0.151309 | 3.713537  |
| H | 2.317221  | -1.045344 | 3.533989  |
| H | 2.971133  | -0.158336 | 4.646111  |
| O | -1.919124 | -4.088150 | 0.931160  |
| H | -2.213258 | -4.972674 | 1.199062  |
| H | -2.754915 | -3.563636 | 0.772035  |
| O | 4.572453  | 2.616173  | 0.751980  |
| H | 5.387117  | 3.130336  | 0.857673  |
| H | 4.708840  | 1.758099  | 1.257342  |
| O | -1.518336 | 1.949281  | 3.595828  |
| H | -0.530005 | 2.008968  | 3.473835  |
| H | -1.693574 | 2.296450  | 4.483866  |
| O | 1.112391  | 2.092788  | 3.375163  |
| H | 1.647205  | 1.272367  | 3.427366  |
| H | 1.537836  | 2.683652  | 2.718355  |
| O | 2.329889  | 3.862971  | 1.613767  |
| H | 2.573341  | 4.659009  | 2.110463  |
| H | 3.181224  | 3.454573  | 1.313119  |
| O | -2.333641 | -0.709844 | 3.641809  |
| H | -1.988930 | 0.206915  | 3.587710  |
| H | -3.178892 | -0.703494 | 3.147064  |
| O | 4.071415  | 2.089012  | -1.936929 |
| H | 4.249506  | 2.260068  | -0.987189 |
| H | 4.167093  | 1.119564  | -2.067902 |
| O | 4.429708  | -0.623329 | -2.273535 |
| H | 3.637269  | -1.086760 | -2.668928 |
| H | 5.168970  | -0.791045 | -2.877312 |
| O | 2.358592  | -1.938852 | -3.258248 |
| H | 2.094383  | -2.627646 | -2.607721 |
| H | 1.544271  | -1.449412 | -3.507210 |
| O | 1.851927  | 3.265369  | -2.781888 |
| H | 2.672618  | 2.782158  | -2.478494 |
| H | 2.155778  | 3.933239  | -3.415128 |
| O | -0.270746 | 1.896682  | -3.931518 |
| H | 0.501613  | 2.331448  | -3.508947 |



|   |           |           |           |
|---|-----------|-----------|-----------|
| H | -1.058424 | 2.189092  | -3.425794 |
| O | 0.033629  | -0.734003 | -4.157146 |
| H | 0.080874  | -0.840213 | -5.119958 |
| H | -0.096543 | 0.244851  | -4.007751 |
| O | -1.882626 | 4.372059  | -0.456427 |
| H | -0.882381 | 4.423096  | -0.456286 |
| H | -2.193467 | 5.283470  | -0.571603 |
| O | 0.749453  | 4.542622  | -0.575488 |
| H | 1.134563  | 4.079692  | -1.351883 |
| H | 1.286309  | 4.279836  | 0.202662  |
| O | -3.112907 | 3.393906  | 1.850146  |
| H | -2.597819 | 3.733311  | 1.087105  |
| H | -2.487035 | 2.893403  | 2.419400  |
| O | -0.814818 | -4.424215 | -1.604898 |
| H | -1.206594 | -4.267638 | -0.718066 |
| H | -1.210137 | -3.753866 | -2.214286 |
| O | 1.773102  | -3.939982 | -1.455158 |
| H | 2.199778  | -4.732840 | -1.815668 |
| H | 0.787876  | -4.126831 | -1.485251 |
| O | -1.888541 | -2.609799 | -3.365543 |
| H | -2.624651 | -2.151743 | -2.906334 |
| H | -1.237097 | -1.913251 | -3.593036 |
| O | -2.547924 | 2.859357  | -2.626727 |
| H | -2.312290 | 3.431229  | -1.853480 |
| H | -2.967342 | 3.450849  | -3.271012 |
| O | -4.508605 | 1.083485  | -1.764654 |
| H | -3.789347 | 1.669494  | -2.084997 |
| H | -4.640405 | 1.311019  | -0.818637 |
| O | -4.082439 | -1.515523 | -2.060239 |
| H | -4.198413 | -0.528242 | -1.954379 |
| H | -4.861471 | -1.818659 | -2.551569 |
| O | -4.941815 | 1.720180  | 0.916852  |
| H | -4.256867 | 2.359692  | 1.273170  |
| H | -5.801916 | 2.153685  | 1.027175  |
| O | -4.735527 | -0.659348 | 2.210230  |
| H | -5.523921 | -0.810049 | 2.752945  |
| H | -4.862415 | 0.215909  | 1.765559  |
| O | -4.127955 | -2.707075 | 0.428446  |
| H | -4.348275 | -1.992204 | 1.062947  |
| H | -4.098208 | -2.283236 | -0.458345 |
| C | 1.685834  | -0.584589 | 0.329555  |
| C | 0.377354  | -1.352973 | 0.513965  |
| C | -0.562350 | -1.244934 | -0.689493 |
| C | -1.037531 | 0.171482  | -1.022735 |
| C | -1.779816 | 0.837305  | 0.134943  |
| H | 2.194998  | -0.898601 | -0.591934 |
| H | 1.514210  | 0.497429  | 0.266479  |
| H | 2.373597  | -0.762488 | 1.163119  |
| H | -0.130883 | -1.010076 | 1.425968  |
| H | 0.594279  | -2.417631 | 0.677432  |
| H | -1.448590 | -1.872286 | -0.510983 |
| H | -0.054469 | -1.671012 | -1.566107 |
| H | -1.701424 | 0.122267  | -1.898056 |
| H | -0.187633 | 0.797524  | -1.328251 |
| H | -2.217333 | 1.792874  | -0.170354 |
| H | -1.114786 | 1.037502  | 0.984299  |
| H | -2.595603 | 0.194896  | 0.497181  |

---

**Table S58.** M06-2X/6-31+G\*/PCM optimized Cartesian coordinates of the n-C<sub>5</sub>H<sub>12</sub>\_g<sup>-</sup>@(H<sub>2</sub>O)<sub>32</sub> 5<sup>12</sup>6<sup>6</sup>-D<sub>3</sub> n-pentane-clathrate.

|   |           |           |           |
|---|-----------|-----------|-----------|
| O | 5.465156  | -0.221329 | -0.184172 |
| H | 5.096151  | -0.492745 | -1.062571 |
| H | 6.428666  | -0.296132 | -0.258635 |
| O | 4.416480  | -1.760283 | 1.878392  |
| H | 4.791617  | -1.180161 | 1.181370  |
| H | 3.887507  | -1.188738 | 2.475542  |
| O | 3.402586  | 2.428827  | 2.793436  |
| H | 2.535597  | 2.885338  | 2.799157  |
| H | 3.230055  | 1.518864  | 3.114124  |
| O | 4.656302  | 2.389307  | 0.379038  |
| H | 4.940041  | 1.464858  | 0.216785  |
| H | 4.164441  | 2.390598  | 1.236292  |
| O | -0.690926 | -2.962000 | 3.461331  |
| H | -0.230037 | -3.482441 | 2.758611  |
| H | -1.586395 | -2.757403 | 3.115009  |
| O | 0.513551  | -0.843810 | 4.446402  |
| H | 0.069336  | -1.635378 | 4.015853  |
| H | 0.518727  | -1.031480 | 5.397820  |
| O | 3.041071  | -0.190022 | 3.701506  |
| H | 3.545682  | -0.273730 | 4.525423  |
| H | 2.116157  | -0.460848 | 3.928777  |
| O | 3.335673  | 3.256518  | -1.738559 |
| H | 3.869929  | 3.982895  | -2.094406 |
| H | 3.810856  | 2.944565  | -0.913897 |
| O | 0.904797  | 3.643869  | 2.981842  |
| H | 0.451640  | 3.994881  | 2.174777  |
| H | 0.952210  | 4.385632  | 3.603999  |
| O | -0.417983 | 4.630234  | 0.818064  |
| H | -0.462117 | 5.595680  | 0.895442  |
| H | 0.030478  | 4.448559  | -0.060964 |
| O | 0.751552  | 4.257997  | -1.506329 |
| H | 1.652413  | 3.869575  | -1.520248 |
| H | 0.224000  | 3.776887  | -2.188309 |
| O | -0.613277 | 1.685937  | 4.255483  |
| H | -0.015045 | 2.288956  | 3.765551  |
| H | -0.225691 | 0.784969  | 4.227387  |
| O | 3.269149  | 1.224324  | -3.633125 |
| H | 3.251568  | 1.949994  | -2.970807 |
| H | 2.339503  | 1.057373  | -3.897789 |
| O | 4.383844  | -0.928797 | -2.575259 |
| H | 5.063759  | -1.207999 | -3.207648 |
| H | 3.942796  | -0.125456 | -2.979759 |
| O | 2.812567  | -3.173567 | -2.025268 |
| H | 3.290261  | -2.340566 | -2.221431 |
| H | 2.879597  | -3.303969 | -1.054818 |
| O | 0.676608  | 0.821155  | -4.556031 |
| H | 0.189998  | -0.028091 | -4.406823 |
| H | 0.711473  | 0.937951  | -5.517843 |
| O | -0.791683 | -1.445442 | -4.248172 |
| H | -0.408256 | -2.163365 | -3.659520 |
| H | -0.882985 | -1.850933 | -5.124440 |

|   |           |           |           |
|---|-----------|-----------|-----------|
| O | 0.236700  | -3.411816 | -2.851493 |
| H | 1.164050  | -3.272791 | -2.538911 |
| H | -0.268304 | -3.765691 | -2.087340 |
| O | -0.668716 | 3.016324  | -3.467878 |
| H | -0.225365 | 2.222880  | -3.834240 |
| H | -1.598114 | 2.758199  | -3.296696 |
| O | 0.519533  | -4.510219 | 1.563273  |
| H | 1.388896  | -4.151776 | 1.283848  |
| H | -0.034432 | -4.529297 | 0.753658  |
| O | 3.028419  | -3.688461 | 0.700295  |
| H | 3.589400  | -4.475517 | 0.776611  |
| H | 3.521595  | -2.958357 | 1.170602  |
| O | -3.453702 | -3.572978 | -0.027747 |
| H | -3.817085 | -2.885160 | -0.626947 |
| H | -3.391595 | -3.167120 | 0.865006  |
| O | -1.107315 | -4.594646 | -0.726277 |
| H | -1.293831 | -5.512319 | -0.976771 |
| H | -1.990365 | -4.190677 | -0.489887 |
| O | -4.646359 | -1.702501 | -1.689821 |
| H | -4.124564 | -1.277222 | -2.428053 |
| H | -5.420900 | -2.108056 | -2.107955 |
| O | -3.333268 | -0.497225 | -3.656197 |
| H | -2.414795 | -0.815337 | -3.793927 |
| H | -3.280554 | 0.462034  | -3.458077 |
| O | -5.485273 | 0.287164  | 0.081247  |
| H | -5.154734 | 1.148925  | -0.248505 |
| H | -5.179446 | -0.392647 | -0.556700 |
| O | -4.536480 | 2.784903  | -0.760305 |
| H | -5.267897 | 3.413556  | -0.856291 |
| H | -3.941759 | 3.155602  | -0.046434 |
| O | -3.333226 | 2.244703  | -3.137918 |
| H | -3.861473 | 2.687572  | -3.819260 |
| H | -3.759533 | 2.468892  | -2.273559 |
| O | -3.033813 | 3.744564  | 1.195121  |
| H | -2.104649 | 4.002055  | 1.013002  |
| H | -3.017974 | 3.144452  | 1.972693  |
| O | -3.276284 | -2.552841 | 2.543790  |
| H | -3.835653 | -3.116655 | 3.099751  |
| H | -3.696080 | -1.643422 | 2.572556  |
| O | -4.496204 | -0.213979 | 2.572034  |
| H | -3.968339 | 0.563714  | 2.853654  |
| H | -4.841717 | -0.011283 | 1.668511  |
| O | -3.093027 | 2.040447  | 3.388579  |
| H | -2.167999 | 1.868112  | 3.722407  |
| H | -3.568655 | 2.461917  | 4.120208  |
| C | 2.124249  | -0.063286 | -0.529258 |
| C | 1.078269  | 0.462360  | 0.454274  |
| C | 0.277803  | -0.656850 | 1.129530  |
| C | -0.399199 | -1.631372 | 0.160837  |
| C | -1.321125 | -0.975051 | -0.865401 |
| H | 2.761777  | -0.819500 | -0.051529 |
| H | 1.659211  | -0.532802 | -1.405321 |
| H | 2.772184  | 0.743246  | -0.889066 |
| H | 0.396969  | 1.149442  | -0.065883 |
| H | 1.577003  | 1.057630  | 1.231234  |
| H | 0.955378  | -1.233036 | 1.778126  |
| H | -0.481532 | -0.214001 | 1.791414  |
| H | -0.980344 | -2.353719 | 0.746953  |

|   |           |           |           |
|---|-----------|-----------|-----------|
| H | 0.370371  | -2.216363 | -0.362642 |
| H | -0.775375 | -0.300659 | -1.537123 |
| H | -2.113713 | -0.393613 | -0.374205 |
| H | -1.805588 | -1.735022 | -1.489069 |

---

**Table S59.** M06-2X/6-31+G\*/PCM optimized Cartesian coordinates of the n-C<sub>5</sub>H<sub>12</sub>\_anti/g<sup>-</sup>@(H<sub>2</sub>O)<sub>32</sub> 5<sup>12</sup>6<sup>6</sup>-D<sub>3</sub> n-pentane-clathrate.

|   |           |           |           |
|---|-----------|-----------|-----------|
| O | 5.620009  | -0.510621 | 0.240405  |
| H | 5.414371  | 0.448668  | 0.367910  |
| H | 6.586252  | -0.583573 | 0.271662  |
| O | 4.638736  | -1.522858 | -2.169427 |
| H | 4.956636  | -1.200064 | -1.298607 |
| H | 3.892259  | -2.132452 | -1.986191 |
| O | 2.686435  | -3.745412 | 1.063029  |
| H | 1.764704  | -3.766907 | 1.393098  |
| H | 2.629626  | -3.619901 | 0.092244  |
| O | 4.405397  | -2.011679 | 2.271330  |
| H | 4.839586  | -1.503516 | 1.553610  |
| H | 3.783168  | -2.638565 | 1.829053  |
| O | -0.629538 | -1.560271 | -4.197305 |
| H | -0.002422 | -0.797005 | -4.199504 |
| H | -1.514596 | -1.204601 | -3.963879 |
| O | 0.118159  | -3.555047 | -2.677713 |
| H | -0.172780 | -2.767635 | -3.232495 |
| H | 0.070183  | -4.323736 | -3.267366 |
| O | 2.660232  | -3.432363 | -1.709232 |
| H | 3.047898  | -4.245696 | -2.068672 |
| H | 1.739812  | -3.399265 | -2.073403 |
| O | 2.982323  | -0.306076 | 3.711010  |
| H | 3.363772  | -0.362813 | 4.600672  |
| H | 3.499621  | -0.959520 | 3.154970  |
| O | 0.041832  | -4.105458 | 1.892369  |
| H | -0.434846 | -3.528334 | 2.540993  |
| H | 0.031768  | -4.996094 | 2.275892  |
| O | -1.310410 | -2.538583 | 3.649700  |
| H | -1.389652 | -3.010340 | 4.493248  |
| H | -0.736730 | -1.738575 | 3.840802  |
| O | 0.253784  | -0.514651 | 4.248453  |
| H | 1.189828  | -0.507322 | 3.957181  |
| H | -0.080697 | 0.411537  | 4.166050  |
| O | -1.392816 | -4.289223 | -0.472284 |
| H | -0.832921 | -4.180534 | 0.326142  |
| H | -0.882825 | -3.940756 | -1.235566 |
| O | 3.503239  | 2.257772  | 2.809970  |
| H | 3.276226  | 1.354670  | 3.125888  |
| H | 2.659722  | 2.752223  | 2.732583  |
| O | 4.989559  | 2.123765  | 0.623964  |
| H | 5.766180  | 2.689982  | 0.749322  |
| H | 4.434333  | 2.215187  | 1.451267  |
| O | 3.612258  | 2.833140  | -1.704159 |
| H | 4.051819  | 2.582268  | -0.864834 |
| H | 3.655558  | 2.043270  | -2.283731 |
| O | 1.130433  | 3.719490  | 2.812838  |

|   |           |           |           |
|---|-----------|-----------|-----------|
| H | 0.744047  | 4.062435  | 1.968243  |
| H | 1.286747  | 4.498134  | 3.368633  |
| O | -0.047532 | 4.656948  | 0.551317  |
| H | 0.419233  | 4.400907  | -0.299154 |
| H | -0.052136 | 5.626331  | 0.567495  |
| O | 1.184071  | 4.080284  | -1.698379 |
| H | 2.041453  | 3.593085  | -1.656471 |
| H | 0.636128  | 3.636480  | -2.380797 |
| O | -0.669824 | 2.032004  | 4.136147  |
| H | -0.077093 | 2.631186  | 3.635902  |
| H | -1.557555 | 2.107219  | 3.728838  |
| O | 1.077590  | 0.545876  | -4.357332 |
| H | 1.976340  | 0.539447  | -3.966333 |
| H | 0.655729  | 1.393009  | -4.100205 |
| O | 3.699576  | 0.627115  | -3.418670 |
| H | 4.273827  | 0.809033  | -4.177751 |
| H | 4.062145  | -0.195435 | -2.983314 |
| O | -2.815318 | 2.162572  | -3.446042 |
| H | -3.259498 | 2.449342  | -2.618490 |
| H | -2.944450 | 1.191057  | -3.514420 |
| O | -0.282054 | 2.892419  | -3.733093 |
| H | -0.278005 | 3.480328  | -4.503363 |
| H | -1.235839 | 2.630776  | -3.591519 |
| O | -4.151448 | 2.988776  | -1.166300 |
| H | -3.588591 | 3.374674  | -0.438164 |
| H | -4.805325 | 3.667513  | -1.391380 |
| O | -2.732577 | 3.961929  | 0.854700  |
| H | -1.772490 | 4.121249  | 0.731502  |
| H | -2.839142 | 3.370938  | 1.629876  |
| O | -5.454807 | 0.693947  | -0.247174 |
| H | -5.207857 | 0.542924  | 0.689423  |
| H | -4.980456 | 1.502396  | -0.536366 |
| O | -4.782940 | 0.169078  | 2.417511  |
| H | -5.589875 | 0.197962  | 2.954232  |
| H | -4.423468 | -0.760849 | 2.511720  |
| O | -3.227266 | 2.319588  | 3.055038  |
| H | -3.768997 | 2.813340  | 3.689318  |
| H | -3.745338 | 1.506550  | 2.834696  |
| O | -3.904879 | -2.324228 | 2.632208  |
| H | -2.987550 | -2.347606 | 2.980151  |
| H | -3.862861 | -2.700622 | 1.725092  |
| O | -3.174170 | -0.577203 | -3.723003 |
| H | -3.700690 | -0.734547 | -4.521448 |
| H | -3.717024 | -0.937147 | -2.962393 |
| O | -4.722431 | -1.446764 | -1.766186 |
| H | -4.360183 | -2.120754 | -1.151228 |
| H | -4.984916 | -0.674930 | -1.207436 |
| O | -3.823681 | -3.358747 | 0.038343  |
| H | -2.903067 | -3.678368 | -0.181482 |
| H | -4.397276 | -4.136929 | -0.035980 |
| C | 2.480309  | -0.119160 | 0.045294  |
| C | 0.961616  | 0.008359  | 0.125923  |
| C | 0.260190  | -1.027616 | -0.754783 |
| C | -1.251516 | -0.822387 | -0.880224 |
| C | -1.959043 | -0.798095 | 0.473718  |
| H | 2.790876  | -1.148999 | 0.260508  |
| H | 2.840212  | 0.134447  | -0.958807 |
| H | 2.981148  | 0.540242  | 0.762303  |

|   |           |           |           |
|---|-----------|-----------|-----------|
| H | 0.654721  | 1.020079  | -0.179226 |
| H | 0.641549  | -0.113530 | 1.169146  |
| H | 0.715185  | -1.012601 | -1.756348 |
| H | 0.456802  | -2.029781 | -0.339669 |
| H | -1.676111 | -1.628840 | -1.494037 |
| H | -1.450422 | 0.113695  | -1.423721 |
| H | -1.665808 | 0.071326  | 1.073969  |
| H | -1.707930 | -1.699218 | 1.049365  |
| H | -3.046922 | -0.767289 | 0.354916  |

---

**Table S60.** M06-2X/6-31+G\*/PCM optimized Cartesian coordinates of the n-C<sub>6</sub>H<sub>14</sub>\_g<sup>-</sup>/g<sup>-</sup>/g<sup>-</sup>@(H<sub>2</sub>O)<sub>32</sub> 5<sup>12</sup>6<sup>6</sup>-D<sub>3</sub> n-hexane-clathrate.

|   |           |           |           |
|---|-----------|-----------|-----------|
| O | 4.666502  | 0.260180  | -2.594633 |
| H | 4.998536  | 0.228996  | -1.671290 |
| H | 4.085078  | -0.521106 | -2.712009 |
| O | 3.346923  | -3.508113 | -0.619071 |
| H | 2.464871  | -3.860110 | -0.376203 |
| H | 3.217380  | -2.977010 | -1.432542 |
| O | 4.682419  | -2.071834 | 1.260067  |
| H | 5.003247  | -1.264784 | 0.804795  |
| H | 4.155472  | -2.575931 | 0.592538  |
| O | -0.628020 | 0.153945  | -4.568410 |
| H | -0.123565 | 0.957156  | -4.291291 |
| H | -1.529951 | 0.258252  | -4.194837 |
| O | 0.553130  | -2.090320 | -3.891108 |
| H | 0.091877  | -1.218610 | -4.089676 |
| H | 0.620551  | -2.542267 | -4.747140 |
| O | 3.111002  | -2.018078 | -2.972728 |
| H | 3.573627  | -2.535325 | -3.650582 |
| H | 2.173355  | -1.955090 | -3.285443 |
| O | 3.294841  | -1.331354 | 3.380002  |
| H | 3.827863  | -1.628098 | 4.133569  |
| H | 3.791809  | -1.627252 | 2.561015  |
| O | 0.860296  | -4.632098 | -0.049276 |
| H | 0.420509  | -4.317091 | 0.779968  |
| H | 0.970752  | -5.589836 | 0.054477  |
| O | -0.426876 | -3.850862 | 2.219867  |
| H | -0.515282 | -4.650309 | 2.762488  |
| H | 0.018377  | -3.174913 | 2.817041  |
| O | 0.704758  | -2.189805 | 3.898847  |
| H | 1.601669  | -1.888312 | 3.638220  |
| H | 0.168212  | -1.375594 | 4.055561  |
| O | -0.665934 | -4.030266 | -2.315759 |
| H | -0.095537 | -4.209684 | -1.537533 |
| H | -0.251042 | -3.290800 | -2.811103 |
| O | 3.250476  | 1.428489  | 3.474813  |
| H | 3.206648  | 0.446792  | 3.440374  |
| H | 2.331848  | 1.756962  | 3.575575  |
| O | 4.583656  | 2.375329  | 1.401767  |
| H | 5.263878  | 2.973639  | 1.746805  |
| H | 4.070898  | 2.043808  | 2.195523  |
| O | 3.010187  | 3.772223  | -0.434869 |
| H | 3.514802  | 3.257802  | 0.229337  |

|   |           |           |           |
|---|-----------|-----------|-----------|
| H | 3.119183  | 3.301220  | -1.288657 |
| O | 0.692711  | 2.386379  | 4.000973  |
| H | 0.217146  | 2.986275  | 3.372793  |
| H | 0.759672  | 2.874569  | 4.835701  |
| O | -0.725536 | 3.984630  | 2.329230  |
| H | -0.285138 | 4.148567  | 1.441963  |
| H | -0.836074 | 4.858773  | 2.733828  |
| O | 0.432713  | 4.513314  | 0.036062  |
| H | 1.354144  | 4.190392  | -0.111417 |
| H | -0.078147 | 4.308726  | -0.776476 |
| O | -0.742101 | 0.037569  | 4.469397  |
| H | -0.276218 | 0.876063  | 4.269070  |
| H | -1.665183 | 0.147567  | 4.160642  |
| O | 0.685120  | 2.435209  | -3.893162 |
| H | 1.585884  | 2.400870  | -3.507870 |
| H | 0.144573  | 3.003740  | -3.304501 |
| O | 3.283195  | 2.506650  | -2.898363 |
| H | 3.803253  | 3.063919  | -3.496724 |
| H | 3.793186  | 1.653623  | -2.801398 |
| O | -3.371704 | 3.000890  | -2.341477 |
| H | -3.767646 | 2.830762  | -1.458817 |
| H | -3.333512 | 2.133572  | -2.802744 |
| O | -0.945790 | 4.066020  | -2.326322 |
| H | -1.041966 | 4.919206  | -2.775748 |
| H | -1.862426 | 3.668614  | -2.293026 |
| O | -4.609983 | 2.531433  | 0.092591  |
| H | -4.079856 | 2.689505  | 0.923553  |
| H | -5.371219 | 3.129220  | 0.146779  |
| O | -3.282305 | 2.886525  | 2.366104  |
| H | -2.357569 | 3.209151  | 2.304737  |
| H | -3.267672 | 2.043427  | 2.867164  |
| O | -5.597173 | -0.086192 | 0.006980  |
| H | -5.248880 | -0.560984 | 0.791258  |
| H | -5.237565 | 0.825058  | 0.062821  |
| O | -4.585705 | -1.470962 | 2.227887  |
| H | -5.301349 | -1.908356 | 2.714243  |
| H | -3.968675 | -2.201060 | 1.929581  |
| O | -3.399831 | 0.459005  | 3.730001  |
| H | -3.930679 | 0.537160  | 4.537264  |
| H | -3.820674 | -0.258859 | 3.193208  |
| O | -3.048232 | -3.455015 | 1.387026  |
| H | -2.117579 | -3.485537 | 1.697260  |
| H | -3.011941 | -3.439168 | 0.404923  |
| O | -3.220669 | 0.579038  | -3.673932 |
| H | -3.756444 | 0.646830  | -4.479122 |
| H | -3.665874 | -0.119641 | -3.110024 |
| O | -4.479458 | -1.216978 | -2.214494 |
| H | -3.932839 | -1.978190 | -1.922870 |
| H | -4.873830 | -0.818900 | -1.400031 |
| O | -3.074758 | -3.453492 | -1.379992 |
| H | -2.164200 | -3.632328 | -1.753036 |
| H | -3.618562 | -4.211947 | -1.643333 |
| C | 2.317268  | -0.044075 | 0.142309  |
| C | 1.242236  | -0.983154 | 0.686735  |
| C | 0.310801  | -1.523740 | -0.402156 |
| C | -0.448113 | -0.460271 | -1.203002 |
| C | -1.259311 | 0.517377  | -0.346434 |
| C | -2.247224 | -0.187678 | 0.582483  |

|   |           |           |           |
|---|-----------|-----------|-----------|
| O | 5.619091  | 0.263359  | 0.024053  |
| H | 2.902889  | -0.545882 | -0.638420 |
| H | 1.885036  | 0.864705  | -0.295014 |
| H | 3.008533  | 0.265014  | 0.933682  |
| H | 0.660939  | -0.472778 | 1.468307  |
| H | 1.728251  | -1.836408 | 1.180228  |
| H | -0.411173 | -2.219327 | 0.050084  |
| H | 0.911937  | -2.120698 | -1.103006 |
| H | 0.251886  | 0.101462  | -1.836778 |
| H | -1.134926 | -0.973803 | -1.893739 |
| H | -1.807783 | 1.195926  | -1.014144 |
| H | -0.583792 | 1.150987  | 0.245921  |
| H | -1.735306 | -0.748638 | 1.375185  |
| H | -2.863313 | -0.901537 | 0.021422  |
| H | -2.919116 | 0.530664  | 1.064049  |
| H | 5.280894  | 1.048915  | 0.522225  |
| H | 6.586345  | 0.318992  | 0.055204  |

**Table S61.** M06-2X/6-31+G\*/PCM optimized Cartesian coordinates of the n-C<sub>6</sub>H<sub>14</sub>\_g<sup>-</sup>/g<sup>-</sup>/g<sup>-</sup>@(H<sub>2</sub>O)<sub>32</sub> 5<sup>12</sup>6<sup>6</sup>-C<sub>2</sub> A n-hexane-clathrate.

|   |           |           |           |
|---|-----------|-----------|-----------|
| O | -5.256511 | -2.266401 | 0.164843  |
| H | -4.928233 | -2.037065 | 1.079789  |
| H | -6.078539 | -2.764703 | 0.286591  |
| O | -3.254010 | -3.722980 | -1.093956 |
| H | -3.990166 | -3.215615 | -0.689160 |
| H | -2.961630 | -3.207813 | -1.875974 |
| O | -4.365056 | -1.610786 | 2.579215  |
| H | -4.216259 | -0.643711 | 2.659837  |
| H | -3.512620 | -2.043309 | 2.801053  |
| O | 1.136716  | -4.556695 | 0.251063  |
| H | 0.166225  | -4.408991 | 0.456353  |
| H | 1.294201  | -5.504817 | 0.377384  |
| O | -1.406246 | -4.243032 | 0.833222  |
| H | -2.045844 | -3.994711 | 0.122061  |
| H | -1.579018 | -3.664595 | 1.604605  |
| O | -1.940559 | -2.829452 | 3.174284  |
| H | -2.036291 | -3.494376 | 3.873144  |
| H | -1.312531 | -2.149757 | 3.527960  |
| O | 1.847730  | -3.789332 | -2.241469 |
| H | 1.874961  | -4.584947 | -2.794412 |
| H | 1.556642  | -4.089253 | -1.343166 |
| O | -4.017672 | 1.134954  | 2.823385  |
| H | -4.664125 | 1.442804  | 3.477538  |
| H | -4.282114 | 1.558221  | 1.966768  |
| O | -4.854367 | 2.204281  | 0.484413  |
| H | -5.609799 | 2.792188  | 0.638033  |
| H | -4.160785 | 2.755395  | 0.009003  |
| O | -3.080088 | 3.601320  | -0.832756 |
| H | -2.802321 | 3.115037  | -1.639570 |
| H | -2.263629 | 3.897734  | -0.361444 |
| O | -1.535001 | 1.580553  | 4.008879  |
| H | -2.378431 | 1.435216  | 3.529619  |
| H | -1.073420 | 0.714241  | 4.012623  |



|   |           |           |           |
|---|-----------|-----------|-----------|
| O | -0.079981 | 3.485331  | 2.839445  |
| H | -0.619668 | 2.753486  | 3.252460  |
| H | -0.114158 | 4.222910  | 3.468048  |
| O | -0.870521 | 4.594878  | 0.393087  |
| H | -0.148779 | 4.472919  | -0.258567 |
| H | -0.595574 | 4.132624  | 1.213150  |
| O | 2.624165  | 3.077500  | 2.423408  |
| H | 1.651694  | 3.134072  | 2.552270  |
| H | 2.799425  | 3.230969  | 1.470995  |
| O | 2.204412  | -1.280320 | 3.615338  |
| H | 2.436812  | -1.993559 | 2.972119  |
| H | 2.770631  | -0.506452 | 3.406206  |
| O | -0.322186 | -0.916286 | 4.215466  |
| H | -0.322269 | -1.062752 | 5.174499  |
| H | 0.634943  | -1.022223 | 3.932065  |
| O | 3.892195  | 0.873343  | 3.171407  |
| H | 3.390316  | 1.701573  | 2.928873  |
| H | 4.366588  | 1.073234  | 3.992615  |
| O | 2.959279  | -3.294079 | 1.958594  |
| H | 3.714844  | -2.988975 | 1.412279  |
| H | 2.296329  | -3.670822 | 1.343448  |
| O | 0.198042  | 2.525988  | -3.582955 |
| H | -0.756826 | 2.369450  | -3.413620 |
| H | 0.522237  | 3.103168  | -2.858955 |
| O | -2.525893 | 2.292350  | -3.208129 |
| H | -3.034410 | 1.428903  | -3.254083 |
| H | -2.910729 | 2.857563  | -3.895548 |
| O | 1.545882  | 0.319747  | -4.145930 |
| H | 1.641607  | 0.349795  | -5.110035 |
| H | 1.049944  | 1.149671  | -3.893874 |
| O | 1.084592  | 4.284459  | -1.613271 |
| H | 1.283532  | 5.133143  | -2.038198 |
| H | 1.921404  | 3.998639  | -1.172365 |
| O | -5.654253 | 0.121076  | -1.213297 |
| H | -5.373703 | 0.838738  | -0.607114 |
| H | -5.530219 | -0.716146 | -0.716454 |
| O | -3.969857 | 0.088129  | -3.357571 |
| H | -4.565355 | 0.074749  | -2.568343 |
| H | -3.427287 | -0.728513 | -3.314882 |
| O | 0.154656  | -1.980350 | -3.498351 |
| H | 0.642192  | -1.148714 | -3.683746 |
| H | 0.755665  | -2.574096 | -3.001221 |
| O | -2.482043 | -2.264361 | -3.336513 |
| H | -2.699164 | -2.766342 | -4.136712 |
| H | -1.497351 | -2.121810 | -3.366649 |
| O | 3.316746  | 3.542180  | -0.237097 |
| H | 3.914181  | 4.305853  | -0.192754 |
| H | 3.862993  | 2.799590  | -0.606488 |
| O | 4.918820  | 1.583690  | -1.165265 |
| H | 4.555723  | 0.981418  | -1.885634 |
| H | 5.707730  | 2.001932  | -1.544007 |
| O | 4.080650  | -0.014829 | -3.063575 |
| H | 4.138510  | -0.948245 | -2.740530 |
| H | 3.163846  | 0.120625  | -3.387848 |
| O | 5.645198  | 0.163798  | 1.123097  |
| H | 5.378457  | 0.677398  | 0.329688  |
| H | 5.033843  | 0.432658  | 1.843500  |
| O | 5.159150  | -2.379610 | 0.519989  |

|   |           |           |           |
|---|-----------|-----------|-----------|
| H | 5.957378  | -2.893143 | 0.714385  |
| H | 5.364781  | -1.432673 | 0.764407  |
| O | 4.346879  | -2.550864 | -2.132923 |
| H | 3.479839  | -3.008452 | -2.136089 |
| H | 4.639061  | -2.516365 | -1.196688 |
| C | -2.147384 | -0.160181 | -0.624967 |
| C | -1.178097 | -0.389398 | 0.534907  |
| C | -0.443334 | 0.886543  | 0.955018  |
| C | 0.375267  | 1.558550  | -0.151646 |
| C | 1.409467  | 0.662691  | -0.839680 |
| C | 2.396184  | 0.022695  | 0.136414  |
| H | -2.753612 | -1.051376 | -0.822016 |
| H | -1.616591 | 0.091091  | -1.552108 |
| H | -2.833566 | 0.668643  | -0.403667 |
| H | -0.456525 | -1.173964 | 0.264587  |
| H | -1.734409 | -0.772194 | 1.402061  |
| H | 0.207849  | 0.669632  | 1.814519  |
| H | -1.189564 | 1.610546  | 1.312554  |
| H | 0.899721  | 2.417962  | 0.289609  |
| H | -0.304985 | 1.974960  | -0.907829 |
| H | 1.964010  | 1.269355  | -1.570322 |
| H | 0.902733  | -0.119701 | -1.422474 |
| H | 3.176795  | -0.535786 | -0.393804 |
| H | 1.897313  | -0.672331 | 0.822235  |
| H | 2.885991  | 0.791201  | 0.748537  |

---

**Table S62.** M06-2X/6-31+G\*/PCM optimized Cartesian coordinates of the  $(\text{CH}_4)_2@(\text{H}_2\text{O})_{26}$   $5^{12}6^3$ - $D_{3h}$  clathrate.

|   |          |           |           |
|---|----------|-----------|-----------|
| O | 4.182091 | 2.376274  | 0.515454  |
| H | 4.865309 | 3.023660  | 0.746399  |
| H | 3.552845 | 2.348952  | 1.290360  |
| O | 2.272624 | -0.232654 | 3.656996  |
| H | 2.630970 | -0.214697 | 4.557474  |
| H | 1.363200 | -0.614251 | 3.734100  |
| O | 2.500255 | 2.312940  | 2.577457  |
| H | 2.357381 | 1.411928  | 2.938073  |
| H | 1.614655 | 2.690213  | 2.392017  |
| O | 3.929490 | -1.744404 | 1.963176  |
| H | 3.338724 | -2.394517 | 1.525300  |
| H | 3.351463 | -1.214890 | 2.550796  |
| O | 2.253851 | -3.596781 | 0.727752  |
| H | 2.273685 | -3.434671 | -0.258480 |
| H | 2.605746 | -4.490057 | 0.860225  |
| O | 2.541358 | 0.968673  | -3.323527 |
| H | 2.952523 | 1.210174  | -4.167857 |
| H | 3.117666 | 0.263405  | -2.936791 |
| O | 2.630884 | 3.203348  | -1.656824 |
| H | 2.570155 | 2.415655  | -2.237681 |
| H | 3.191784 | 2.927301  | -0.900224 |
| O | 4.103877 | -0.986663 | -2.236952 |
| H | 4.524816 | -0.697472 | -1.373249 |
| H | 4.831696 | -1.245597 | -2.822632 |
| O | 5.151422 | -0.207411 | 0.067422  |
| H | 4.878766 | 0.720105  | 0.238295  |

|   |           |           |           |
|---|-----------|-----------|-----------|
| H | 4.719058  | -0.749857 | 0.772841  |
| O | -0.198033 | -3.477875 | 2.018810  |
| H | 0.638931  | -3.481628 | 1.505282  |
| H | -0.140218 | -2.733327 | 2.655817  |
| O | 2.366221  | -3.136595 | -1.876413 |
| H | 1.483350  | -2.935238 | -2.255566 |
| H | 2.938967  | -2.354435 | -2.030789 |
| O | -2.356686 | 2.513500  | 2.580926  |
| H | -2.804929 | 3.042243  | 3.259030  |
| H | -2.939210 | 2.556296  | 1.766021  |
| O | -2.176523 | 3.282872  | -1.687659 |
| H | -2.507971 | 4.086873  | -2.115438 |
| H | -1.259202 | 3.506052  | -1.358705 |
| O | 0.004140  | -0.045961 | -3.927054 |
| H | 0.867077  | 0.335102  | -3.662097 |
| H | -0.002435 | -0.972207 | -3.603511 |
| O | -2.383929 | 1.161505  | -3.453512 |
| H | -2.263675 | 1.906315  | -2.825061 |
| H | -1.489941 | 0.766326  | -3.596797 |
| O | -4.021503 | -0.649659 | -2.461461 |
| H | -3.405440 | 0.050080  | -2.837087 |
| H | -4.649054 | -0.866055 | -3.167984 |
| O | -5.116933 | 0.162728  | -0.113063 |
| H | -4.809571 | -0.136477 | -1.005514 |
| H | -6.080152 | 0.254700  | -0.168957 |
| O | -2.554259 | -3.485686 | 0.795212  |
| H | -2.916786 | -4.374405 | 0.929185  |
| H | -1.652840 | -3.486500 | 1.224555  |
| O | -2.445948 | -0.116517 | 3.494153  |
| H | -2.378584 | 0.796128  | 3.141405  |
| H | -3.074579 | -0.603667 | 2.907243  |
| O | -0.179691 | -1.404111 | 3.862785  |
| H | -1.021799 | -0.881064 | 3.705509  |
| H | -0.272769 | -1.797726 | 4.743937  |
| O | -4.188334 | -1.537980 | 1.940589  |
| H | -4.549703 | -0.976854 | 1.223863  |
| H | -3.640196 | -2.224704 | 1.502979  |
| O | -2.492540 | -2.912546 | -1.906545 |
| H | -3.026231 | -2.102420 | -2.056536 |
| H | -2.494143 | -3.080264 | -0.938546 |
| O | -0.109356 | -2.673275 | -3.042811 |
| H | -0.163344 | -3.253731 | -3.817249 |
| H | -0.983280 | -2.772938 | -2.567351 |
| O | -3.857881 | 2.611391  | 0.408672  |
| H | -3.273654 | 2.809232  | -0.357068 |
| H | -4.290999 | 1.751168  | 0.221173  |
| O | 0.083733  | 3.590960  | 2.036568  |
| H | 0.097367  | 4.453392  | 2.478872  |
| H | -0.792399 | 3.186459  | 2.256977  |
| O | 0.189218  | 3.978977  | -0.721657 |
| H | 1.055394  | 3.659311  | -1.074291 |
| H | 0.201888  | 3.830196  | 0.247069  |
| C | 1.633155  | 0.174340  | -0.244010 |
| H | 2.700155  | 0.392839  | -0.321964 |
| H | 1.415356  | -0.216211 | 0.754402  |
| H | 1.354726  | -0.572015 | -0.994164 |
| H | 1.061074  | 1.090746  | -0.412266 |
| C | -1.649042 | -0.129358 | -0.071190 |

|   |           |           |           |
|---|-----------|-----------|-----------|
| H | -2.730024 | -0.278826 | -0.039941 |
| H | -1.326642 | -0.006639 | -1.109366 |
| H | -1.390406 | 0.766739  | 0.500618  |
| H | -1.149632 | -0.998543 | 0.366594  |

---

**Table S63.** M06-2X/6-31+G\*/PCM optimized Cartesian coordinates of the  $(\text{CH}_4)_2@(\text{H}_2\text{O})_{28}$   $5^{12}6^4$ - $D_2$  clathrate.

|   |           |           |           |
|---|-----------|-----------|-----------|
| O | -2.840048 | 3.500836  | -1.453057 |
| H | -1.880251 | 3.694919  | -1.491463 |
| H | -2.987368 | 2.656352  | -1.929417 |
| O | -0.161659 | 4.296542  | -1.403069 |
| H | 0.514791  | 3.799707  | -1.943597 |
| H | -0.134865 | 5.212668  | -1.718012 |
| O | 1.713488  | 3.005614  | -2.776869 |
| H | 1.482407  | 2.101163  | -3.081887 |
| H | 2.507075  | 2.918544  | -2.206630 |
| O | -3.480933 | 1.131649  | -2.765758 |
| H | -3.995917 | 1.377289  | -3.549413 |
| H | -4.106285 | 0.613283  | -2.180586 |
| O | -1.350264 | -0.421125 | -3.632945 |
| H | -1.501681 | -1.315981 | -3.259879 |
| H | -2.076253 | 0.146969  | -3.293611 |
| O | 1.151024  | 0.468098  | -3.751217 |
| H | 1.290485  | 0.525665  | -4.708967 |
| H | 0.215182  | 0.141301  | -3.640505 |
| O | -4.064924 | -2.811355 | -1.026551 |
| H | -3.284628 | -2.879908 | -1.631883 |
| H | -4.670949 | -3.521759 | -1.286566 |
| O | -5.150995 | -0.237081 | -1.216313 |
| H | -5.104156 | 0.129568  | -0.296936 |
| H | -4.829434 | -1.161258 | -1.157552 |
| O | 3.943231  | 2.868853  | -1.109572 |
| H | 3.673243  | 3.014194  | -0.168409 |
| H | 4.579687  | 3.568577  | -1.320734 |
| O | 5.037400  | 0.314807  | -1.398859 |
| H | 4.682154  | 1.219942  | -1.272348 |
| H | 5.112316  | -0.074190 | -0.502986 |
| O | 3.273119  | -1.129265 | -2.900287 |
| H | 3.880026  | -0.575948 | -2.350214 |
| H | 2.493815  | -0.575079 | -3.119592 |
| O | 3.138871  | 3.163504  | 1.472439  |
| H | 3.661762  | 3.832507  | 1.940379  |
| H | 3.292941  | 2.302532  | 1.959980  |
| O | 0.549357  | 4.188431  | 1.281838  |
| H | 0.321644  | 4.215242  | 0.326515  |
| H | 1.431403  | 3.765754  | 1.352416  |
| O | -1.427371 | 3.189073  | 2.752423  |
| H | -0.664023 | 3.547930  | 2.219245  |
| H | -1.538244 | 3.792107  | 3.502778  |
| O | 3.615411  | 0.902646  | 2.759702  |
| H | 2.805394  | 0.426280  | 3.047711  |
| H | 4.129056  | 0.274727  | 2.208292  |
| O | 1.364908  | -0.446466 | 3.680608  |
| H | 1.525370  | -0.563643 | 4.629907  |

|   |           |           |           |
|---|-----------|-----------|-----------|
| H | 1.384000  | -1.366582 | 3.290108  |
| O | -1.214614 | 0.592400  | 3.681478  |
| H | -0.303425 | 0.240486  | 3.589184  |
| H | -1.216319 | 1.504922  | 3.318767  |
| O | 5.110904  | -0.843203 | 1.158104  |
| H | 4.665108  | -1.723616 | 1.105627  |
| H | 6.000190  | -1.004551 | 1.508269  |
| O | -4.977549 | 0.797919  | 1.290951  |
| H | -4.523297 | 1.673907  | 1.235672  |
| H | -4.398880 | 0.234901  | 1.846933  |
| O | -3.718838 | 3.219023  | 1.125783  |
| H | -2.924165 | 3.212849  | 1.699121  |
| H | -3.386359 | 3.333946  | 0.203994  |
| O | -3.348477 | -0.803097 | 2.926114  |
| H | -2.511505 | -0.314210 | 3.162812  |
| H | -3.813653 | -0.946102 | 3.764367  |
| O | 1.498752  | -2.890565 | 2.673896  |
| H | 2.229412  | -2.969614 | 2.024632  |
| H | 0.694425  | -3.246749 | 2.238046  |
| O | 3.663887  | -3.141608 | 0.926346  |
| H | 4.140983  | -3.960255 | 1.132766  |
| H | 3.344399  | -3.234360 | -0.008899 |
| O | -1.875188 | -2.956849 | -2.639586 |
| H | -1.116824 | -3.358688 | -2.123663 |
| H | -2.033962 | -3.550687 | -3.389383 |
| O | 0.056943  | -4.080930 | -1.239217 |
| H | 0.975541  | -3.756241 | -1.356095 |
| H | -0.144446 | -4.064768 | -0.277646 |
| O | 2.709098  | -3.328322 | -1.594416 |
| H | 3.135140  | -4.038822 | -2.098338 |
| H | 2.894825  | -2.477417 | -2.099558 |
| O | -0.667484 | -4.095109 | 1.431376  |
| H | -0.695087 | -5.011195 | 1.746811  |
| H | -1.603275 | -3.748471 | 1.508653  |
| O | -3.158681 | -3.205982 | 1.586584  |
| H | -3.492548 | -3.047985 | 0.677441  |
| H | -3.196034 | -2.339023 | 2.049274  |
| C | 1.733430  | -0.453703 | 0.040918  |
| H | 1.531054  | 0.336793  | -0.687553 |
| H | 1.305875  | -1.394555 | -0.317437 |
| H | 1.282772  | -0.191374 | 1.001926  |
| H | 2.814095  | -0.564217 | 0.160510  |
| C | -1.737688 | -0.410466 | 0.104643  |
| H | -2.794858 | -0.637519 | -0.052500 |
| H | -1.270417 | -1.219645 | 0.673461  |
| H | -1.649615 | 0.524598  | 0.665894  |
| H | -1.237255 | -0.307683 | -0.862002 |

**Table S64.** M06-2X/6-31+G\*/PCM optimized Cartesian coordinates of the  $(\text{CH}_4)_3@(\text{H}_2\text{O})_{30}$   $5^{12}6^5-C_{2v}$  B clathrate.

|   |           |           |           |
|---|-----------|-----------|-----------|
| O | -2.368505 | -1.014439 | -3.484382 |
| H | -2.484431 | -1.107474 | -4.441857 |
| H | -1.473293 | -0.593250 | -3.346482 |
| O | -1.222551 | 4.131670  | 2.069080  |

|   |           |           |           |
|---|-----------|-----------|-----------|
| H | -2.008618 | 3.599597  | 1.823485  |
| H | -0.588053 | 3.534319  | 2.521834  |
| O | -2.587935 | -0.878342 | 3.442224  |
| H | -2.879620 | -0.952297 | 4.363258  |
| H | -3.314221 | -0.392661 | 2.955471  |
| O | 4.164117  | -3.417790 | 0.117978  |
| H | 4.131463  | -2.855401 | -0.690363 |
| H | 3.363888  | -3.990642 | 0.096736  |
| O | 1.645914  | -2.087077 | 3.505541  |
| H | 1.802977  | -2.297165 | 4.438523  |
| H | 1.220643  | -2.888690 | 3.109051  |
| O | 0.397717  | -4.218775 | 2.371303  |
| H | 0.352358  | -4.967711 | 2.985460  |
| H | -0.542161 | -3.902599 | 2.259056  |
| O | -3.618112 | 2.859130  | -1.430033 |
| H | -4.244680 | 3.511541  | -1.779702 |
| H | -2.714190 | 3.169100  | -1.724896 |
| O | -5.202367 | -1.041560 | -0.148252 |
| H | -6.159645 | -1.179348 | -0.215917 |
| H | -4.934933 | -0.523096 | -0.963128 |
| O | -3.754458 | -3.347275 | 0.004941  |
| H | -4.354816 | -4.108386 | 0.005405  |
| H | -4.327612 | -2.542008 | -0.052651 |
| O | 4.526260  | 0.936262  | -1.386992 |
| H | 5.437572  | 1.099184  | -1.675364 |
| H | 4.553865  | 0.948555  | -0.386322 |
| O | 1.752267  | -2.208967 | -3.440664 |
| H | 1.306575  | -2.985055 | -3.016951 |
| H | 1.863587  | -2.437527 | -4.375718 |
| O | 0.473101  | -4.279992 | -2.225413 |
| H | 0.449649  | -5.056842 | -2.805319 |
| H | -0.474186 | -3.975278 | -2.143734 |
| O | 0.680510  | 2.592964  | 3.376324  |
| H | 0.425551  | 1.628256  | 3.322725  |
| H | 0.696464  | 2.820057  | 4.318496  |
| O | -2.053622 | -3.453659 | -2.203998 |
| H | -2.182914 | -2.592966 | -2.659827 |
| H | -2.610649 | -3.425021 | -1.397873 |
| O | 3.086763  | 3.110950  | 2.187507  |
| H | 3.605841  | 3.575487  | 2.861824  |
| H | 2.218336  | 2.903206  | 2.612917  |
| O | -4.530320 | 0.393272  | 2.156186  |
| H | -4.768347 | -0.102694 | 1.342861  |
| H | -4.200354 | 1.267122  | 1.855123  |
| O | 4.137602  | -1.754469 | -2.078407 |
| H | 4.200143  | -0.805917 | -1.838111 |
| H | 3.303782  | -1.863531 | -2.580891 |
| O | -4.471169 | 0.336778  | -2.297309 |
| H | -4.139593 | 1.218989  | -2.024643 |
| H | -3.710134 | -0.120128 | -2.719962 |
| O | 4.035496  | -1.571855 | 2.137285  |
| H | 4.069815  | -2.250925 | 1.420354  |
| H | 3.193732  | -1.724683 | 2.613112  |
| O | 3.108365  | 3.183799  | -2.255011 |
| H | 2.948248  | 3.741087  | -1.454809 |
| H | 3.579401  | 2.380998  | -1.942304 |
| O | -2.115048 | -3.349647 | 2.262877  |
| H | -2.269397 | -2.474938 | 2.682049  |

|   |           |           |           |
|---|-----------|-----------|-----------|
| H | -2.658386 | -3.360694 | 1.447068  |
| O | 0.037921  | -0.084051 | -2.947349 |
| H | 0.724255  | -0.744153 | -3.179789 |
| H | 0.377071  | 0.809134  | -3.175820 |
| O | -0.024590 | 0.076556  | 3.070320  |
| H | -0.942825 | -0.226886 | 3.238589  |
| H | 0.569446  | -0.679133 | 3.267817  |
| O | 1.876284  | -5.003925 | 0.105286  |
| H | 1.337833  | -4.721790 | 0.873777  |
| H | 1.359611  | -4.739707 | -0.684412 |
| O | -1.267688 | 3.848704  | -2.159814 |
| H | -0.841243 | 4.357077  | -1.435469 |
| H | -0.553500 | 3.328848  | -2.589486 |
| O | 0.823253  | 2.507015  | -3.397736 |
| H | 0.903103  | 2.782378  | -4.323293 |
| H | 1.687996  | 2.756293  | -2.955064 |
| O | -3.621586 | 2.899361  | 1.300114  |
| H | -3.640308 | 2.907665  | 0.310563  |
| H | -4.285323 | 3.548997  | 1.579704  |
| O | 4.589776  | 0.942162  | 1.259291  |
| H | 3.997595  | 1.622991  | 1.641447  |
| H | 4.310741  | 0.059362  | 1.606630  |
| O | -0.099874 | 5.244607  | -0.064453 |
| H | -0.321617 | 6.187888  | -0.074211 |
| H | -0.527449 | 4.861661  | 0.753379  |
| O | 2.664460  | 4.760457  | -0.053256 |
| H | 1.705812  | 4.967551  | -0.046957 |
| H | 2.814262  | 4.194481  | 0.733489  |
| C | 1.062350  | 1.739651  | 0.037082  |
| H | 2.155804  | 1.745263  | 0.039667  |
| H | 0.699038  | 2.771444  | 0.007782  |
| H | 0.694692  | 1.243792  | 0.940158  |
| H | 0.701125  | 1.198915  | -0.842101 |
| C | -2.059568 | -0.067886 | -0.012399 |
| H | -2.499853 | -1.066451 | 0.075158  |
| H | -2.857447 | 0.668894  | -0.129140 |
| H | -1.481431 | 0.150911  | 0.889806  |
| H | -1.396771 | -0.037574 | -0.882074 |
| C | 0.713043  | -1.879864 | 0.106859  |
| H | -0.051483 | -2.662926 | 0.076689  |
| H | 1.700183  | -2.336278 | 0.219506  |
| H | 0.513624  | -1.214321 | 0.951285  |
| H | 0.672596  | -1.301213 | -0.820387 |

**Table S65.** M06-2X/6-31+G\*/PCM optimized Cartesian coordinates of the  $(\text{CH}_4)_3@(\text{H}_2\text{O})_{32}$   $5^{12}6^6$ - $D_{3h}$  clathrate.

|   |          |           |           |
|---|----------|-----------|-----------|
| O | 4.047393 | -1.636690 | -2.235084 |
| H | 4.118550 | -2.279236 | -1.496751 |
| H | 3.151002 | -1.747515 | -2.619560 |
| O | 4.863832 | 0.786607  | -1.528890 |
| H | 4.522526 | -0.107788 | -1.814750 |
| H | 5.764667 | 0.851925  | -1.880808 |
| O | 3.441853 | 3.042262  | -2.291101 |
| H | 3.917469 | 2.214371  | -2.060029 |

|   |           |           |           |
|---|-----------|-----------|-----------|
| H | 3.362521  | 3.542724  | -1.452019 |
| O | 1.542919  | -2.046245 | -3.373447 |
| H | 1.642486  | -2.203894 | -4.324900 |
| H | 1.198904  | -2.895169 | -2.993310 |
| O | -2.702097 | -0.257807 | -3.436807 |
| H | -1.730546 | -0.100736 | -3.284569 |
| H | -2.827538 | -0.289965 | -4.396760 |
| O | -0.131081 | 0.116945  | -2.875223 |
| H | 0.481586  | -0.621994 | -3.074740 |
| H | 0.330132  | 0.954212  | -3.097499 |
| O | 1.044210  | 2.577552  | -3.350363 |
| H | 1.948556  | 2.721181  | -2.950626 |
| H | 1.127051  | 2.803699  | -4.289159 |
| O | -3.655501 | -2.621436 | -2.271532 |
| H | -4.195626 | -2.406421 | -1.473039 |
| H | -3.308019 | -1.774802 | -2.620274 |
| O | 0.738472  | 5.437877  | 0.136519  |
| H | 1.691634  | 5.171657  | 0.138741  |
| H | 0.723593  | 6.407313  | 0.137861  |
| O | 3.272648  | 4.471144  | 0.127653  |
| H | 3.382352  | 3.871498  | 0.910931  |
| H | 3.982897  | 5.128754  | 0.185450  |
| O | -3.125502 | 3.924940  | -1.439124 |
| H | -3.636964 | 4.685922  | -1.752738 |
| H | -2.185189 | 4.088077  | -1.727258 |
| O | -0.604854 | 4.455883  | -2.125914 |
| H | -0.052945 | 3.761854  | -2.548221 |
| H | -0.102222 | 4.780045  | -1.349934 |
| O | -4.422002 | 1.574864  | -2.229533 |
| H | -3.782995 | 0.952097  | -2.636569 |
| H | -3.912885 | 2.375704  | -1.984838 |
| O | 3.504149  | 2.770695  | 2.226004  |
| H | 4.012857  | 1.978979  | 1.881794  |
| H | 4.050838  | 3.152467  | 2.930290  |
| O | 4.916636  | 0.766156  | 1.247130  |
| H | 4.913442  | 0.771409  | 0.264555  |
| H | 4.636910  | -0.133766 | 1.521600  |
| O | 4.216871  | -1.800978 | 2.066312  |
| H | 4.271716  | -2.422969 | 1.298325  |
| H | 4.891167  | -2.098185 | 2.696609  |
| O | -0.595819 | 4.324975  | 2.252885  |
| H | -0.106895 | 4.762702  | 1.514803  |
| H | -0.684655 | 4.998011  | 2.945364  |
| O | 0.998995  | 2.318560  | 3.379181  |
| H | 1.871840  | 2.401096  | 2.938999  |
| H | 0.417078  | 2.980631  | 2.949808  |
| O | 4.303793  | -3.428286 | -0.112272 |
| H | 3.553583  | -4.095297 | -0.116618 |
| H | 5.126926  | -3.934626 | -0.187851 |
| O | 2.245153  | -5.075637 | -0.105964 |
| H | 1.686403  | -4.842820 | -0.880150 |
| H | 1.724318  | -4.835864 | 0.693169  |
| O | -0.034519 | -0.127009 | 3.694148  |
| H | -0.079952 | -0.174268 | 4.662457  |
| H | 0.344853  | 0.774996  | 3.506239  |
| O | 1.796161  | -2.208138 | 3.373401  |
| H | 2.608796  | -1.947748 | 2.890189  |
| H | 1.189771  | -1.436605 | 3.376243  |



|   |           |           |           |
|---|-----------|-----------|-----------|
| O | 0.842960  | -4.391096 | 2.187768  |
| H | 0.936517  | -5.086131 | 2.856851  |
| H | 1.174005  | -3.552480 | 2.616938  |
| O | -1.767645 | -4.402639 | -1.470729 |
| H | -1.783578 | -4.393845 | -0.482934 |
| H | -2.407636 | -3.712389 | -1.774850 |
| O | 0.698254  | -4.399593 | -2.329765 |
| H | -0.265924 | -4.374501 | -2.036821 |
| H | 0.761762  | -5.106508 | -2.990281 |
| O | -3.652983 | -2.692361 | 2.234940  |
| H | -4.193432 | -3.121037 | 2.915500  |
| H | -3.305661 | -1.852301 | 2.647727  |
| O | -1.770977 | -4.473637 | 1.247939  |
| H | -0.876359 | -4.339112 | 1.625499  |
| H | -2.367453 | -3.806500 | 1.649838  |
| O | -3.179866 | 3.763238  | 1.333961  |
| H | -3.154016 | 3.822383  | 0.353654  |
| H | -2.264395 | 3.920965  | 1.647482  |
| O | -4.352546 | 1.534736  | 2.187519  |
| H | -4.986561 | 1.819018  | 2.863264  |
| H | -3.887726 | 2.364051  | 1.883950  |
| O | -2.804390 | -0.437125 | 3.361140  |
| H | -1.838294 | -0.277092 | 3.325463  |
| H | -3.249213 | 0.312284  | 2.907951  |
| O | -5.721916 | 0.528698  | -0.049265 |
| H | -5.255047 | 0.909836  | -0.830329 |
| H | -5.268120 | 0.895568  | 0.738362  |
| O | -5.203212 | -2.165035 | -0.056010 |
| H | -4.652510 | -2.330092 | 0.737781  |
| H | -5.414813 | -1.200909 | -0.039056 |
| C | 1.444585  | 1.638262  | 0.021108  |
| H | 2.516521  | 1.455989  | -0.097259 |
| H | 1.268844  | 2.711200  | 0.145489  |
| H | 1.082881  | 1.107794  | 0.905767  |
| H | 0.913681  | 1.279027  | -0.864032 |
| C | -2.130323 | -0.535523 | 0.062971  |
| H | -3.161598 | -0.172802 | 0.039713  |
| H | -1.536971 | 0.089884  | 0.736643  |
| H | -2.118548 | -1.568860 | 0.422918  |
| H | -1.697450 | -0.494330 | -0.939893 |
| C | 0.912033  | -1.954733 | -0.011377 |
| H | 0.299212  | -2.840888 | -0.200020 |
| H | 1.967833  | -2.239829 | 0.027016  |
| H | 0.619038  | -1.515222 | 0.945719  |
| H | 0.752110  | -1.224236 | -0.808540 |

**Table S66.** M06-2X/6-31+G\*/PCM optimized Cartesian coordinates of the  $(\text{CH}_4)_4@(\text{H}_2\text{O})_{34}$   $5^{12}6^7\text{-C}_{3v}$  clathrate.

|   |          |          |          |
|---|----------|----------|----------|
| O | 5.466167 | 1.364218 | 1.130611 |
| H | 5.226154 | 0.516094 | 1.607672 |
| H | 6.385665 | 1.559050 | 1.368496 |
| O | 3.748966 | 3.376473 | 1.795583 |
| H | 4.227447 | 4.026813 | 2.332203 |
| H | 4.403812 | 2.667209 | 1.576244 |

|   |           |           |           |
|---|-----------|-----------|-----------|
| O | 5.197592  | 0.999256  | -1.619860 |
| H | 5.292031  | 1.134680  | -0.651900 |
| H | 4.509088  | 1.633687  | -1.918333 |
| O | 4.582826  | -1.536058 | -2.040717 |
| H | 5.225323  | -1.854764 | -2.693132 |
| H | 4.779845  | -0.561601 | -1.910180 |
| O | 2.083921  | -2.322751 | -3.025193 |
| H | 1.791189  | -3.161776 | -2.610597 |
| H | 2.915210  | -2.040517 | -2.589649 |
| O | 3.348728  | 2.869338  | -2.504495 |
| H | 3.803939  | 3.389167  | -3.184851 |
| H | 3.141216  | 3.510646  | -1.766485 |
| O | 0.940280  | 2.162858  | -3.648399 |
| H | 0.712030  | 1.218102  | -3.512645 |
| H | 1.803352  | 2.323598  | -3.207536 |
| O | 0.227100  | -0.515829 | -3.625443 |
| H | 0.905669  | -1.168404 | -3.298426 |
| H | 0.215824  | -0.640365 | -4.587760 |
| O | 0.147459  | 5.343500  | -0.693432 |
| H | 0.127929  | 6.291055  | -0.898002 |
| H | -0.202605 | 4.883689  | -1.497434 |
| O | 2.816271  | 4.563781  | -0.532974 |
| H | 3.062047  | 4.158350  | 0.325854  |
| H | 1.869447  | 4.817536  | -0.489293 |
| O | -1.602247 | 4.886407  | 1.451217  |
| H | -1.242462 | 4.200218  | 2.052795  |
| H | -0.949004 | 5.005791  | 0.730768  |
| O | -1.263223 | -5.294435 | -1.315152 |
| H | -1.888176 | -4.605288 | -1.623941 |
| H | -1.322112 | -5.265020 | -0.327311 |
| O | 1.265371  | -4.807537 | -2.023860 |
| H | 1.507144  | -5.527113 | -2.625953 |
| H | 0.308636  | -4.961220 | -1.773976 |
| O | -1.445256 | -5.181578 | 1.402503  |
| H | -0.585259 | -4.830600 | 1.716826  |
| H | -2.116252 | -4.506958 | 1.660763  |
| O | -4.870524 | -2.637025 | -0.040031 |
| H | -4.289245 | -2.916646 | -0.791068 |
| H | -5.629462 | -3.240279 | -0.055413 |
| O | -3.324651 | -3.327585 | 2.175681  |
| H | -2.951808 | -2.545321 | 2.634021  |
| H | -3.862204 | -2.996789 | 1.426284  |
| O | -2.432311 | -1.161631 | -3.222269 |
| H | -1.489894 | -0.889234 | -3.209001 |
| H | -2.981479 | -0.394990 | -2.946688 |
| O | -3.211301 | -3.405651 | -2.074463 |
| H | -3.745689 | -3.831167 | -2.763095 |
| H | -2.864812 | -2.562839 | -2.487972 |
| O | 2.750256  | -4.750093 | 0.320022  |
| H | 2.281977  | -4.776790 | -0.543345 |
| H | 3.440954  | -4.055954 | 0.260032  |
| O | 4.765334  | -2.817449 | 0.340119  |
| H | 4.763883  | -2.357788 | -0.537459 |
| H | 5.613665  | -3.283986 | 0.395340  |
| O | 4.807803  | -0.884861 | 2.367760  |
| H | 3.921942  | -0.768473 | 2.778559  |
| H | 4.724396  | -1.595039 | 1.696566  |
| O | 0.993012  | -4.114442 | 2.201136  |

|   |           |           |           |
|---|-----------|-----------|-----------|
| H | 1.330963  | -4.429713 | 3.052484  |
| H | 1.680022  | -4.352112 | 1.516247  |
| O | 0.319251  | -1.428721 | 2.392582  |
| H | -0.546721 | -1.376833 | 2.853456  |
| H | 0.500274  | -2.381448 | 2.239993  |
| O | 2.392987  | -0.386646 | 3.618453  |
| H | 2.411354  | -0.677677 | 4.542458  |
| H | 1.591036  | -0.818608 | 3.199549  |
| O | -2.152496 | -1.253782 | 3.624441  |
| H | -2.147550 | -1.465041 | 4.569989  |
| H | -2.509900 | -0.323904 | 3.547862  |
| O | 1.718085  | 2.277965  | 3.369621  |
| H | 2.382766  | 2.684979  | 2.775828  |
| H | 1.976547  | 1.335215  | 3.467793  |
| O | -0.857069 | 2.973509  | 3.319743  |
| H | 0.089430  | 2.667727  | 3.277832  |
| H | -0.936528 | 3.434156  | 4.169270  |
| O | -3.044878 | 1.241183  | 3.466027  |
| H | -2.283848 | 1.832039  | 3.283468  |
| H | -3.717077 | 1.392024  | 2.767346  |
| O | -5.070403 | 1.730400  | 1.611737  |
| H | -5.899247 | 1.985862  | 2.043541  |
| H | -5.313171 | 1.063670  | 0.910606  |
| O | -5.723825 | 0.026798  | -0.356816 |
| H | -5.432328 | -0.895727 | -0.196765 |
| H | -5.212465 | 0.321782  | -1.143193 |
| O | -0.791627 | 4.003247  | -2.875300 |
| H | -0.162111 | 3.270277  | -3.139619 |
| H | -0.862616 | 4.581814  | -3.650176 |
| O | -3.402352 | 3.273233  | -2.226934 |
| H | -2.462085 | 3.463685  | -2.429559 |
| H | -3.557561 | 3.535805  | -1.284844 |
| O | -4.253717 | 0.807681  | -2.579257 |
| H | -3.892677 | 1.734631  | -2.454276 |
| H | -4.840181 | 0.855479  | -3.349720 |
| O | -3.923336 | 3.958272  | 0.336747  |
| H | -3.098687 | 4.253029  | 0.791385  |
| H | -4.276189 | 3.187125  | 0.827253  |
| C | -2.675429 | -0.125856 | 0.505653  |
| H | -2.875228 | 0.939964  | 0.356170  |
| H | -2.688333 | -0.636771 | -0.462428 |
| H | -3.449202 | -0.549526 | 1.151095  |
| H | -1.695575 | -0.257263 | 0.971725  |
| C | 2.476053  | 0.223125  | 0.061037  |
| H | 1.679748  | -0.138771 | 0.717110  |
| H | 2.806326  | 1.213190  | 0.391025  |
| H | 2.104385  | 0.292569  | -0.966133 |
| H | 3.320379  | -0.470018 | 0.093801  |
| C | -0.251153 | -2.333465 | -0.646852 |
| H | -1.093087 | -2.602623 | -0.002049 |
| H | -0.080320 | -1.256075 | -0.587173 |
| H | -0.472310 | -2.617180 | -1.679012 |
| H | 0.646450  | -2.861402 | -0.309799 |
| C | -0.276728 | 2.123980  | -0.359734 |
| H | -1.141587 | 2.793778  | -0.362041 |
| H | 0.615113  | 2.665789  | -0.688342 |
| H | -0.463564 | 1.287275  | -1.040147 |
| H | -0.117998 | 1.738989  | 0.651281  |

**Table S67.** M06-2X/6-31+G\*/PCM optimized Cartesian coordinates of the  $(\text{CH}_4)_4@(\text{H}_2\text{O})_{36}$   $5^{12}6^8$  clathrate.

|   |           |           |           |
|---|-----------|-----------|-----------|
| O | -2.753603 | -4.236670 | -1.195370 |
| H | -3.496872 | -3.629439 | -0.984907 |
| H | -2.175653 | -4.272722 | -0.403323 |
| O | 2.628495  | -3.328185 | 3.054781  |
| H | 3.388877  | -2.851872 | 2.617639  |
| H | 3.026324  | -3.868181 | 3.754934  |
| O | 2.520454  | -1.134394 | -4.221530 |
| H | 2.827043  | -1.386495 | -5.105569 |
| H | 1.993030  | -1.909930 | -3.881990 |
| O | 2.714390  | 4.450169  | 1.048906  |
| H | 3.038364  | 5.317345  | 1.336551  |
| H | 2.229247  | 4.609706  | 0.191373  |
| O | 4.891376  | 2.001464  | -1.992851 |
| H | 5.705089  | 2.310639  | -2.420072 |
| H | 4.150675  | 2.480231  | -2.441385 |
| O | 2.774649  | 3.288966  | -3.168420 |
| H | 3.072797  | 3.855430  | -3.896803 |
| H | 2.208466  | 2.580405  | -3.589200 |
| O | -1.244325 | -4.604737 | 1.128037  |
| H | -1.588980 | -5.465042 | 1.413923  |
| H | -0.252622 | -4.712098 | 1.127168  |
| O | -1.545575 | -3.391562 | -3.401864 |
| H | -1.742256 | -4.075487 | -4.060378 |
| H | -1.979784 | -3.699279 | -2.555409 |
| O | -1.392281 | 1.267648  | -4.502853 |
| H | -1.569336 | 1.535558  | -5.417755 |
| H | -1.843933 | 1.951853  | -3.933588 |
| O | 2.547948  | 1.069373  | 3.967663  |
| H | 2.892048  | 1.297388  | 4.845549  |
| H | 3.346261  | 0.924632  | 3.398799  |
| O | -1.409881 | 3.490369  | 3.482227  |
| H | -1.525869 | 4.205979  | 4.125729  |
| H | -0.428058 | 3.423061  | 3.329632  |
| O | -1.307708 | 4.662283  | -1.188437 |
| H | -1.727252 | 4.502208  | -0.298242 |
| H | -1.574593 | 5.560717  | -1.437494 |
| O | 4.731725  | -2.767350 | -0.805347 |
| H | 4.702344  | -1.974664 | -1.413402 |
| H | 5.581020  | -3.201808 | -0.979402 |
| O | -2.673950 | 3.083973  | -3.047968 |
| H | -3.456893 | 2.687700  | -2.608328 |
| H | -2.174753 | 3.581629  | -2.364969 |
| O | 4.685920  | -2.075023 | 1.888262  |
| H | 4.649613  | -1.098725 | 1.969133  |
| H | 4.701160  | -2.274522 | 0.927437  |
| O | 1.219936  | -3.271645 | -3.336684 |
| H | 0.241299  | -3.303755 | -3.263540 |
| H | 1.605206  | -3.693925 | -2.540970 |
| O | 1.233622  | 3.382459  | 3.149501  |
| H | 1.683606  | 2.544402  | 3.387533  |
| H | 1.695191  | 3.740916  | 2.360923  |

|   |           |           |           |
|---|-----------|-----------|-----------|
| O | -2.621865 | -3.029404 | 2.972803  |
| H | -2.124110 | -2.404880 | 3.542226  |
| H | -1.990385 | -3.455855 | 2.357733  |
| O | 4.882274  | 2.715674  | 0.706017  |
| H | 4.112896  | 3.316325  | 0.818065  |
| H | 4.883787  | 2.448076  | -0.238394 |
| O | 1.209498  | -1.330943 | 4.398278  |
| H | 1.635842  | -2.036941 | 3.866269  |
| H | 1.666369  | -0.492215 | 4.175960  |
| O | 1.372064  | 1.383071  | -4.355848 |
| H | 1.713794  | 0.466990  | -4.274025 |
| H | 0.391762  | 1.333072  | -4.331178 |
| O | -2.780521 | 1.246964  | 4.485259  |
| H | -2.213731 | 1.965134  | 4.133589  |
| H | -2.226619 | 0.438942  | 4.526222  |
| O | 4.671770  | -0.747560 | -2.525083 |
| H | 3.906722  | -0.838887 | -3.134831 |
| H | 4.728647  | 0.199688  | -2.279113 |
| O | 1.469825  | 4.879084  | -1.271528 |
| H | 1.842580  | 4.309073  | -1.977223 |
| H | 0.503571  | 4.708848  | -1.237112 |
| O | 1.393951  | -5.018120 | 1.207891  |
| H | 1.820160  | -4.416727 | 1.857753  |
| H | 1.822130  | -4.828828 | 0.346106  |
| O | -1.430394 | -1.209964 | 4.711386  |
| H | -1.574206 | -1.540831 | 5.611034  |
| H | -0.444630 | -1.235451 | 4.568752  |
| O | 2.638258  | -4.472784 | -1.247558 |
| H | 3.420801  | -3.882858 | -1.113221 |
| H | 2.989127  | -5.298278 | -1.615948 |
| O | 4.719357  | 0.677605  | 2.387775  |
| H | 5.519714  | 0.773904  | 2.927191  |
| H | 4.763304  | 1.415093  | 1.710917  |
| O | -2.870692 | -1.103300 | -4.304170 |
| H | -2.282861 | -0.318722 | -4.306745 |
| H | -2.346150 | -1.857518 | -3.960192 |
| O | -2.611142 | 4.294837  | 1.108460  |
| H | -2.176579 | 3.985672  | 1.933193  |
| H | -3.390643 | 3.717656  | 0.962172  |
| O | -4.755894 | -1.825442 | 1.778685  |
| H | -3.967231 | -2.246388 | 2.196452  |
| H | -4.741042 | -0.875177 | 2.046777  |
| O | -5.042139 | -0.615811 | -2.721516 |
| H | -5.027885 | -1.277901 | -1.996274 |
| H | -4.256582 | -0.808984 | -3.290207 |
| O | -4.936691 | -2.563721 | -0.739137 |
| H | -5.736812 | -3.109479 | -0.778257 |
| H | -4.879805 | -2.228162 | 0.204944  |
| O | -4.955896 | 1.911253  | -1.961345 |
| H | -5.721904 | 2.317572  | -2.394869 |
| H | -4.985843 | 0.938652  | -2.206329 |
| O | -4.858456 | 2.711973  | 0.644035  |
| H | -5.666353 | 3.229810  | 0.780016  |
| H | -4.907588 | 2.371286  | -0.282785 |
| O | -4.774082 | 0.754743  | 2.652126  |
| H | -4.042603 | 0.954586  | 3.282547  |
| H | -4.742518 | 1.432758  | 1.947477  |
| C | -1.797100 | -1.081130 | -0.940001 |

|   |           |           |           |
|---|-----------|-----------|-----------|
| H | -2.798486 | -1.214812 | -1.354303 |
| H | -1.062254 | -1.507186 | -1.628362 |
| H | -1.729985 | -1.590806 | 0.025479  |
| H | -1.596950 | -0.014947 | -0.802687 |
| C | 2.090412  | 1.491735  | -0.374091 |
| H | 1.112952  | 1.220771  | -0.783131 |
| H | 2.408338  | 2.443650  | -0.802022 |
| H | 2.819816  | 0.715650  | -0.621229 |
| H | 2.017992  | 1.589310  | 0.713166  |
| C | 1.495926  | -1.716254 | 0.680300  |
| H | 0.698586  | -2.233247 | 1.221403  |
| H | 1.078029  | -1.218582 | -0.197832 |
| H | 2.253882  | -2.436844 | 0.364642  |
| H | 1.958489  | -0.972308 | 1.335434  |
| C | -0.809694 | 0.583274  | 2.048421  |
| H | -1.399193 | -0.318087 | 2.238057  |
| H | -1.475805 | 1.400984  | 1.759114  |
| H | -0.098576 | 0.388034  | 1.244385  |
| H | -0.263366 | 0.859407  | 2.955159  |

**Table S68.** M06-2X/6-31+G\*/PCM optimized Cartesian coordinates of the  $(\text{CH}_4)_5@(\text{H}_2\text{O})_{36}$  5<sup>12</sup>6<sup>8</sup> clathrate.

|   |           |           |           |
|---|-----------|-----------|-----------|
| O | 2.875238  | -3.444004 | -3.221904 |
| H | 3.634577  | -3.049832 | -2.740246 |
| H | 2.423940  | -2.688447 | -3.659247 |
| O | -2.009561 | 1.391425  | -3.937203 |
| H | -2.920760 | 1.258805  | -3.550396 |
| H | -2.098460 | 1.255836  | -4.892826 |
| O | -3.222073 | -4.231292 | 0.691194  |
| H | -3.539356 | -5.140550 | 0.805599  |
| H | -2.600596 | -4.263053 | -0.087933 |
| O | -2.503794 | 3.089804  | 2.847508  |
| H | -2.666920 | 3.422807  | 3.742802  |
| H | -1.965779 | 2.249291  | 2.948499  |
| O | -5.169921 | -0.522923 | 2.172666  |
| H | -5.912248 | -0.545989 | 2.796408  |
| H | -4.369817 | -0.759511 | 2.705119  |
| O | -2.948742 | -1.124260 | 3.653461  |
| H | -3.169097 | -1.108769 | 4.597539  |
| H | -2.606390 | -2.047909 | 3.461875  |
| O | 1.549193  | -1.274172 | -4.357294 |
| H | 1.237253  | -1.427067 | -5.261913 |
| H | 0.732044  | -1.106935 | -3.807429 |
| O | 1.128303  | -4.544523 | -1.496069 |
| H | 1.196806  | -5.491172 | -1.696547 |
| H | 1.760346  | -4.101880 | -2.128244 |
| O | 0.702177  | -3.630242 | 3.273882  |
| H | 0.915415  | -4.266212 | 3.974022  |
| H | 1.092602  | -2.766906 | 3.575133  |
| O | -2.265117 | 4.822082  | -1.159233 |
| H | -2.632842 | 5.703213  | -1.327730 |
| H | -3.042517 | 4.221889  | -1.052382 |
| O | 1.663176  | 4.578859  | 1.618852  |
| H | 1.949658  | 5.492906  | 1.769277  |
| H | 0.673641  | 4.629393  | 1.511204  |

|   |           |           |           |
|---|-----------|-----------|-----------|
| O | 1.084105  | 1.199165  | 4.594688  |
| H | 1.718943  | 1.891446  | 4.258468  |
| H | 0.905487  | 1.417328  | 5.521496  |
| O | -5.082293 | -1.534496 | -2.152769 |
| H | -5.239417 | -1.904950 | -1.237387 |
| H | -5.849924 | -1.795271 | -2.684401 |
| O | 1.960129  | -1.428484 | 4.151277  |
| H | 2.805108  | -1.315944 | 3.664292  |
| H | 1.614214  | -0.525409 | 4.311655  |
| O | -4.413425 | 1.106751  | -2.839725 |
| H | -4.436690 | 1.741622  | -2.090623 |
| H | -4.627108 | 0.219685  | -2.482773 |
| O | -1.671422 | -4.378531 | -1.474977 |
| H | -0.695387 | -4.287817 | -1.465230 |
| H | -2.015057 | -3.736595 | -2.131901 |
| O | -0.985901 | 4.863319  | 1.353763  |
| H | -1.355020 | 4.825991  | 0.446472  |
| H | -1.521400 | 4.234432  | 1.885840  |
| O | 3.134588  | 1.032921  | -4.118145 |
| H | 2.579834  | 1.743932  | -3.735527 |
| H | 2.552775  | 0.250277  | -4.221152 |
| O | -4.775285 | 2.206780  | 1.551074  |
| H | -3.989569 | 2.492082  | 2.069056  |
| H | -4.882382 | 1.243571  | 1.700783  |
| O | -0.840527 | 3.841385  | -3.392258 |
| H | -1.295225 | 2.989891  | -3.576074 |
| H | -1.275732 | 4.207390  | -2.593713 |
| O | -2.072618 | -3.552207 | 3.122070  |
| H | -2.392066 | -3.789748 | 2.224080  |
| H | -1.090352 | -3.569518 | 3.099084  |
| O | 3.044290  | 3.926388  | -0.728910 |
| H | 2.468968  | 4.077695  | 0.050279  |
| H | 2.471340  | 3.681075  | -1.485222 |
| O | -5.466275 | -2.580048 | 0.276549  |
| H | -4.698267 | -3.171813 | 0.431673  |
| H | -5.384917 | -1.860392 | 0.939665  |
| O | -1.146551 | 0.852316  | 2.960168  |
| H | -1.712336 | 0.116857  | 3.280397  |
| H | -0.365568 | 0.913915  | 3.550580  |
| O | -0.603360 | -0.746444 | -2.876231 |
| H | -1.004678 | 0.086561  | -3.207675 |
| H | -1.323010 | -1.405097 | -2.970085 |
| O | 1.777261  | 3.318544  | -3.135235 |
| H | 2.180579  | 3.991943  | -3.704671 |
| H | 0.796588  | 3.484958  | -3.193880 |
| O | -2.754344 | -2.496737 | -3.185284 |
| H | -3.612464 | -2.162521 | -2.822526 |
| H | -2.929441 | -2.772668 | -4.097398 |
| O | -4.417847 | 3.101165  | -0.915557 |
| H | -5.223308 | 3.609318  | -1.100232 |
| H | -4.541585 | 2.730360  | 0.006047  |
| O | 2.240982  | -4.442568 | 1.056231  |
| H | 1.638805  | -4.129905 | 1.763781  |
| H | 1.743440  | -4.411823 | 0.211676  |
| O | 2.820803  | 3.029986  | 3.659908  |
| H | 2.381263  | 3.551734  | 2.953911  |
| H | 3.528888  | 2.520076  | 3.210112  |
| O | 5.259330  | 0.350438  | -2.465463 |

|   |           |           |           |
|---|-----------|-----------|-----------|
| H | 4.511883  | 0.610840  | -3.052747 |
| H | 5.168272  | 0.912808  | -1.660558 |
| O | 4.450700  | -2.853664 | 0.821646  |
| H | 4.585802  | -2.578745 | -0.110719 |
| H | 3.632893  | -3.406586 | 0.856392  |
| O | 5.031977  | -2.247705 | -1.846530 |
| H | 5.889593  | -2.648155 | -2.054440 |
| H | 5.119594  | -1.276002 | -2.065002 |
| O | 4.382978  | -1.137331 | 2.816916  |
| H | 5.066268  | -1.479513 | 3.414023  |
| H | 4.408943  | -1.731961 | 2.009492  |
| O | 4.837792  | 1.519982  | 2.420489  |
| H | 5.700351  | 1.697598  | 2.826023  |
| H | 4.674390  | 0.552801  | 2.548198  |
| O | 5.029705  | 2.078930  | -0.336275 |
| H | 4.306065  | 2.733423  | -0.480380 |
| H | 4.967354  | 1.820235  | 0.605389  |
| C | 2.364590  | -0.870001 | -1.282507 |
| H | 1.467948  | -0.250283 | -1.355565 |
| H | 2.918703  | -0.809125 | -2.218384 |
| H | 2.065532  | -1.905991 | -1.100261 |
| H | 2.997354  | -0.522822 | -0.460538 |
| C | -0.098848 | -1.948647 | 0.834792  |
| H | -0.631059 | -1.465858 | 1.659103  |
| H | -0.279259 | -1.390470 | -0.088527 |
| H | -0.458559 | -2.975400 | 0.713911  |
| H | 0.973327  | -1.958404 | 1.049939  |
| C | 1.687352  | 1.178054  | 1.417291  |
| H | 2.486110  | 1.652472  | 0.838464  |
| H | 1.091794  | 0.535570  | 0.769506  |
| H | 1.041376  | 1.942999  | 1.853238  |
| H | 2.130756  | 0.572987  | 2.214041  |
| C | -2.959822 | -0.490090 | -0.010642 |
| H | -3.970077 | -0.105182 | -0.170197 |
| H | -2.358615 | -0.351053 | -0.913526 |
| H | -3.006876 | -1.556277 | 0.231129  |
| H | -2.490835 | 0.045713  | 0.819772  |
| C | -0.896683 | 2.035618  | -0.611670 |
| H | -0.223803 | 2.885110  | -0.759261 |
| H | -0.440242 | 1.125242  | -1.010871 |
| H | -1.840796 | 2.214650  | -1.135459 |
| H | -1.089906 | 1.902328  | 0.456521  |

**Table S69.** M06-2X/6-31+G\*/PCM optimized Cartesian coordinates of the  $(\text{CH}_4)_6@(\text{H}_2\text{O})_{36}$   $5^{12}6^8$  clathrate.

|   |           |          |           |
|---|-----------|----------|-----------|
| O | 2.564605  | 4.874804 | -0.804437 |
| H | 3.327419  | 4.268471 | -0.681402 |
| H | 2.040378  | 4.801383 | 0.022538  |
| O | -2.439355 | 2.599383 | 3.585459  |
| H | -3.158769 | 2.133679 | 3.075416  |
| H | -2.905699 | 3.166263 | 4.219838  |
| O | -2.632223 | 1.667456 | -3.852899 |
| H | -3.048443 | 1.935433 | -4.686951 |
| H | -2.226571 | 2.500984 | -3.483547 |



|   |           |           |           |
|---|-----------|-----------|-----------|
| O | -2.527020 | -4.605419 | 0.582412  |
| H | -2.660747 | -5.538415 | 0.807898  |
| H | -2.049735 | -4.596623 | -0.293907 |
| O | -4.920539 | -1.961420 | -2.024537 |
| H | -5.724309 | -2.193774 | -2.514599 |
| H | -4.166634 | -2.312143 | -2.559266 |
| O | -2.740694 | -2.861235 | -3.466714 |
| H | -3.006855 | -3.407580 | -4.222410 |
| H | -2.255044 | -2.081386 | -3.857506 |
| O | 1.206848  | 4.646247  | 1.653027  |
| H | 1.402470  | 5.465685  | 2.133388  |
| H | 0.213337  | 4.580596  | 1.647455  |
| O | 1.116051  | 3.958893  | -2.880605 |
| H | 1.296437  | 4.603635  | -3.582585 |
| H | 1.636036  | 4.281584  | -2.093152 |
| O | 1.269431  | -0.734729 | -4.868022 |
| H | 1.502469  | -0.856663 | -5.800840 |
| H | 1.761997  | -1.441641 | -4.368810 |
| O | -2.399062 | -1.848191 | 4.179451  |
| H | -2.702543 | -2.429329 | 4.893761  |
| H | -3.194014 | -1.675343 | 3.618218  |
| O | 1.738788  | -4.008890 | 2.883915  |
| H | 1.731983  | -4.725999 | 3.535691  |
| H | 0.785390  | -3.807005 | 2.692490  |
| O | 1.519449  | -4.408449 | -1.721890 |
| H | 2.042367  | -4.462637 | -0.876245 |
| H | 1.687206  | -5.252787 | -2.169199 |
| O | -4.910467 | 2.576778  | -0.226796 |
| H | -4.851538 | 1.898680  | -0.957816 |
| H | -5.822760 | 2.904923  | -0.238383 |
| O | 2.682907  | -2.617477 | -3.552577 |
| H | 3.408095  | -2.184605 | -3.052132 |
| H | 2.211901  | -3.177440 | -2.899280 |
| O | -4.415345 | 1.414698  | 2.246830  |
| H | -4.428048 | 0.435417  | 2.208004  |
| H | -4.579267 | 1.756692  | 1.341554  |
| O | -1.667840 | 3.985262  | -2.919709 |
| H | -0.697182 | 3.965028  | -2.773733 |
| H | -2.086288 | 4.214477  | -2.062975 |
| O | -0.813285 | -3.358291 | 2.395600  |
| H | -1.333906 | -2.805484 | 3.013791  |
| H | -1.443733 | -3.783239 | 1.776092  |
| O | 2.464512  | 2.753724  | 3.332152  |
| H | 1.929321  | 2.023983  | 3.707032  |
| H | 1.890071  | 3.295458  | 2.753248  |
| O | -4.886746 | -3.106120 | 0.569620  |
| H | -4.083252 | -3.671390 | 0.554246  |
| H | -4.930501 | -2.684027 | -0.314585 |
| O | -1.327549 | 0.573018  | 5.196480  |
| H | -1.698011 | 1.280018  | 4.624382  |
| H | -1.701448 | -0.266601 | 4.854335  |
| O | -1.508999 | -0.781356 | -4.598525 |
| H | -1.782464 | 0.097605  | -4.262387 |
| H | -0.527660 | -0.781703 | -4.638082 |
| O | 2.860568  | -1.659039 | 4.033453  |
| H | 2.387855  | -2.427257 | 3.651722  |
| H | 2.201836  | -0.952447 | 4.195298  |
| O | -4.734063 | 0.839347  | -2.229150 |

|   |           |           |           |
|---|-----------|-----------|-----------|
| H | -3.962255 | 1.047583  | -2.799243 |
| H | -4.740500 | -0.130139 | -2.082498 |
| O | -1.272150 | -4.543649 | -1.773676 |
| H | -1.673172 | -3.880763 | -2.375054 |
| H | -0.311912 | -4.354590 | -1.711825 |
| O | -1.463114 | 4.551040  | 1.811475  |
| H | -1.774396 | 3.816770  | 2.383396  |
| H | -1.997439 | 4.519628  | 0.989971  |
| O | 1.339852  | 0.606082  | 4.763897  |
| H | 1.726939  | 0.787285  | 5.634301  |
| H | 0.356204  | 0.578844  | 4.913023  |
| O | -3.044031 | 4.578358  | -0.528296 |
| H | -3.741603 | 3.884786  | -0.432031 |
| H | -3.514538 | 5.423606  | -0.591335 |
| O | -4.553323 | -1.347032 | 2.549250  |
| H | -5.366968 | -1.434212 | 3.070172  |
| H | -4.658481 | -1.982032 | 1.784010  |
| O | 2.375307  | 1.746774  | -4.085088 |
| H | 1.865667  | 0.934357  | -4.285125 |
| H | 1.785302  | 2.380806  | -3.628708 |
| O | 3.063791  | -4.704319 | 0.478847  |
| H | 2.590120  | -4.493804 | 1.312297  |
| H | 3.782392  | -4.040115 | 0.408655  |
| O | 4.724528  | 1.949115  | 1.979809  |
| H | 3.903613  | 2.203875  | 2.462507  |
| H | 4.762612  | 0.964964  | 2.010254  |
| O | 4.503794  | 1.186199  | -2.461060 |
| H | 4.527818  | 1.828884  | -1.719242 |
| H | 3.711582  | 1.401231  | -3.009405 |
| O | 4.720117  | 3.088470  | -0.433775 |
| H | 5.583448  | 3.520881  | -0.516510 |
| H | 4.719237  | 2.643074  | 0.462039  |
| O | 4.778758  | -1.420621 | -2.151980 |
| H | 5.571584  | -1.601074 | -2.680812 |
| H | 4.661270  | -0.426215 | -2.182473 |
| O | 5.074587  | -2.723247 | 0.247941  |
| H | 5.975373  | -3.081321 | 0.240777  |
| H | 4.971295  | -2.236823 | -0.605809 |
| O | 4.867516  | -0.786356 | 2.323230  |
| H | 4.133488  | -1.089520 | 2.905735  |
| H | 4.913180  | -1.429806 | 1.587444  |
| C | 1.970956  | 1.808183  | -0.021097 |
| H | 1.103205  | 1.370971  | 0.476868  |
| H | 2.357283  | 2.620919  | 0.592685  |
| H | 1.669495  | 2.189022  | -1.001436 |
| H | 2.743932  | 1.046336  | -0.150878 |
| C | 0.672358  | -0.415212 | -1.996079 |
| H | 0.347766  | -1.390976 | -2.368913 |
| H | 0.513563  | -0.370509 | -0.919073 |
| H | 0.091866  | 0.376729  | -2.480439 |
| H | 1.736041  | -0.271762 | -2.204645 |
| C | 2.089815  | -1.746426 | 0.698360  |
| H | 2.731681  | -2.273367 | 1.401519  |
| H | 1.892933  | -0.743976 | 1.082964  |
| H | 1.145837  | -2.290720 | 0.591825  |
| H | 2.587356  | -1.674386 | -0.273788 |
| C | -1.721926 | 1.903730  | -0.336146 |
| H | -2.277748 | 1.913558  | 0.606628  |

|   |           |           |           |
|---|-----------|-----------|-----------|
| H | -1.011026 | 2.734364  | -0.353746 |
| H | -2.418561 | 1.994923  | -1.172744 |
| H | -1.182001 | 0.962549  | -0.424984 |
| C | -2.256954 | -1.502598 | -0.611355 |
| H | -2.727958 | -2.458470 | -0.834012 |
| H | -2.888081 | -0.927244 | 0.073138  |
| H | -2.116080 | -0.941921 | -1.540787 |
| H | -1.286136 | -1.688905 | -0.146210 |
| C | -0.664279 | 0.073750  | 2.230931  |
| H | -0.185107 | -0.583506 | 2.959523  |
| H | -0.379815 | 1.113720  | 2.417613  |
| H | -1.752072 | -0.023540 | 2.305669  |
| H | -0.352003 | -0.221461 | 1.229516  |

---

**Table S70.** MP2/6-31+G\*/PCM optimized Cartesian coordinates of the (H<sub>2</sub>O)<sub>16</sub> hollow clathrate in the decahedron 4<sup>25</sup><sub>8</sub> configuration.

|   |           |           |           |
|---|-----------|-----------|-----------|
| O | -0.659167 | 1.838198  | 2.556905  |
| H | -0.200714 | 0.985139  | 2.769836  |
| H | -1.571514 | 1.587448  | 2.280682  |
| O | -0.666768 | 2.670409  | -1.796043 |
| H | -0.192004 | 2.904101  | -0.956169 |
| H | -0.713522 | 3.497992  | -2.309102 |
| O | 3.198710  | -1.912018 | -0.363229 |
| H | 2.325869  | -2.366665 | -0.423927 |
| H | 3.220136  | -1.484581 | 0.523880  |
| O | 0.668655  | -0.537705 | 3.129306  |
| H | 0.237942  | -1.300015 | 2.679114  |
| H | 1.579543  | -0.488013 | 2.756666  |
| O | 3.235664  | 0.297294  | -1.969554 |
| H | 3.269709  | -0.567724 | -1.473155 |
| H | 4.004610  | 0.299308  | -2.568063 |
| O | -3.205247 | -1.591175 | 1.128581  |
| H | -3.237596 | -1.570130 | 0.144227  |
| H | -2.336934 | -1.996419 | 1.359118  |
| O | 3.234677  | -0.296204 | 1.970844  |
| H | 4.003462  | -0.297701 | 2.569547  |
| H | 3.268289  | 0.568797  | 1.474350  |
| O | -3.205715 | 1.590734  | -1.128501 |
| H | -2.337120 | 1.995369  | -1.359324 |
| H | -3.237734 | 1.569406  | -0.144111 |
| O | -0.658144 | -1.838003 | -2.557150 |
| H | -1.570613 | -1.587387 | -2.281300 |
| H | -0.199770 | -0.984948 | -2.770269 |
| O | 3.197355  | 1.912989  | 0.364613  |
| H | 2.324389  | 2.367498  | 0.424607  |
| H | 3.219655  | 1.485813  | -0.522587 |
| O | -3.235276 | 1.088293  | 1.661748  |
| H | -3.265738 | 0.094674  | 1.573471  |
| H | -3.992993 | 1.335225  | 2.222490  |
| O | -3.234821 | -1.089268 | -1.661990 |
| H | -3.992400 | -1.335992 | -2.223008 |
| H | -3.265527 | -0.095732 | -1.573250 |

|   |           |           |           |
|---|-----------|-----------|-----------|
| O | 0.661078  | 3.148222  | 0.594689  |
| H | 0.717077  | 4.085627  | 0.856459  |
| H | 0.162896  | 2.688707  | 1.333620  |
| O | 0.662916  | -3.148125 | -0.595432 |
| H | 0.719572  | -4.085249 | -0.858073 |
| H | 0.164369  | -2.688395 | -1.333978 |
| O | -0.666410 | -2.671378 | 1.794774  |
| H | -0.190968 | -2.904847 | 0.955237  |
| H | -0.711628 | -3.498661 | 2.308438  |
| O | 0.669999  | 0.537624  | -3.129501 |
| H | 0.238622  | 1.299852  | -2.679847 |
| H | 1.580577  | 0.488413  | -2.756063 |

---

**Table S71.** MP2/6-31+G\*/PCM optimized Cartesian coordinates of the (H<sub>2</sub>O)<sub>16</sub> hollow clathrate in the decahedron 4<sup>3</sup>5<sup>6</sup>6<sup>1</sup> configuration.

|   |           |           |           |
|---|-----------|-----------|-----------|
| O | 2.383151  | 1.257924  | 2.149119  |
| H | 2.965543  | 1.603199  | 2.850449  |
| H | 2.162028  | 2.038319  | 1.577259  |
| O | -3.658424 | -0.205942 | 0.556898  |
| H | -3.285805 | -1.129749 | 0.658903  |
| H | -4.615586 | -0.278415 | 0.726197  |
| O | 1.578596  | 2.166801  | -2.199536 |
| H | 1.755589  | 2.540182  | -1.306151 |
| H | 1.971115  | 1.262055  | -2.198242 |
| O | 1.228671  | -2.629454 | -1.961570 |
| H | 0.249999  | -2.520843 | -2.015061 |
| H | 1.422205  | -2.909684 | -1.037369 |
| O | 2.767390  | -0.385466 | -2.149410 |
| H | 2.174221  | -1.187629 | -2.184232 |
| H | 3.437235  | -0.517649 | -2.844815 |
| O | -2.226108 | 1.589672  | 2.098089  |
| H | -2.801421 | 0.956596  | 1.594266  |
| H | -2.800208 | 1.978158  | 2.783452  |
| O | -1.138952 | 2.383807  | -2.314100 |
| H | -0.150548 | 2.260836  | -2.375925 |
| H | -1.382528 | 2.973205  | -3.050952 |
| O | 3.544064  | -0.783088 | 0.559493  |
| H | 3.167593  | -0.056642 | 1.109144  |
| H | 3.369620  | -0.530615 | -0.376439 |
| O | -2.473787 | -2.645940 | 0.615753  |
| H | -1.677791 | -2.621235 | 1.208810  |
| H | -2.121573 | -2.696851 | -0.301976 |
| O | -1.073119 | 3.464388  | 0.315158  |
| H | -1.505361 | 2.827956  | 0.931670  |
| H | -1.242394 | 3.118009  | -0.591425 |
| O | -0.273913 | -2.520117 | 2.290389  |
| H | -0.164974 | -1.587219 | 2.602995  |
| H | 0.546385  | -2.726193 | 1.786111  |
| O | -2.749285 | 0.080239  | -2.125609 |
| H | -3.132263 | 0.118833  | -1.219501 |
| H | -2.165252 | 0.870612  | -2.207172 |
| O | 1.641899  | 3.286261  | 0.420036  |
| H | 2.044644  | 4.164284  | 0.550389  |
| H | 0.653004  | 3.424068  | 0.463107  |

|   |           |           |           |
|---|-----------|-----------|-----------|
| O | -1.575537 | -2.384277 | -2.082313 |
| H | -1.966116 | -1.474150 | -2.202912 |
| H | -1.985239 | -2.944126 | -2.766634 |
| O | -0.029288 | 0.122705  | 3.160396  |
| H | 0.793512  | 0.544554  | 2.822319  |
| H | -0.773172 | 0.661778  | 2.806356  |
| O | 2.034302  | -3.055771 | 0.726852  |
| H | 2.574794  | -3.827724 | 0.974614  |
| H | 2.645471  | -2.267846 | 0.755607  |

---

**Table S72.** MP2/6-31+G\*/PCM optimized Cartesian coordinates of the (H<sub>2</sub>O)<sub>17</sub> hollow clathrate in the undecahedron 4<sup>4</sup>5<sup>6</sup>6<sup>1</sup> configuration.

|   |           |           |           |
|---|-----------|-----------|-----------|
| O | 1.879351  | 1.578956  | 1.784797  |
| H | 1.826694  | 0.666184  | 2.161285  |
| H | 2.730436  | 1.577883  | 1.289070  |
| O | -0.546325 | -3.422637 | 0.073678  |
| H | -1.309414 | -3.061258 | -0.433626 |
| H | 0.259200  | -3.178212 | -0.438090 |
| O | -2.772094 | -2.287600 | -1.251016 |
| H | -3.245940 | -1.702377 | -0.592111 |
| H | -3.436818 | -2.920869 | -1.578288 |
| O | 1.810579  | -2.683894 | -1.334237 |
| H | 2.256870  | -3.434922 | -1.766250 |
| H | 2.472517  | -2.310982 | -0.686064 |
| O | -3.311694 | 1.581111  | -1.393503 |
| H | -2.712893 | 1.075169  | -1.987170 |
| H | -2.752783 | 2.265292  | -0.957315 |
| O | 2.432644  | 1.610979  | -2.410774 |
| H | 1.936013  | 0.794428  | -2.706877 |
| H | 2.801710  | 2.014520  | -3.217305 |
| O | -1.779637 | -0.303109 | -2.939133 |
| H | -2.144663 | -1.085508 | -2.451563 |
| H | -2.132701 | -0.374502 | -3.845307 |
| O | -2.287432 | -0.078700 | 2.711296  |
| H | -2.786384 | -0.038967 | 3.547582  |
| H | -1.781579 | 0.777710  | 2.660482  |
| O | 3.526563  | -1.597815 | 0.486449  |
| H | 3.766532  | -0.677627 | 0.231012  |
| H | 3.021606  | -1.497193 | 1.327191  |
| O | -0.901321 | 2.290454  | 2.479137  |
| H | -1.255591 | 2.757792  | 1.686945  |
| H | 0.053043  | 2.160424  | 2.297688  |
| O | -3.908983 | -0.460871 | 0.406054  |
| H | -3.370790 | -0.317852 | 1.219004  |
| H | -3.755586 | 0.338938  | -0.157859 |
| O | 1.944263  | -1.058656 | 2.758868  |
| H | 2.297850  | -1.181364 | 3.658645  |
| H | 1.057192  | -1.524823 | 2.740953  |
| O | 0.891481  | 3.005976  | -0.521537 |
| H | 1.340145  | 2.596757  | -1.297378 |
| H | 1.151705  | 2.445781  | 0.241494  |
| O | 1.048173  | -0.615030 | -3.095843 |
| H | 0.071434  | -0.508240 | -3.017897 |
| H | 1.290728  | -1.361753 | -2.498502 |

|   |           |           |           |
|---|-----------|-----------|-----------|
| O | -0.470581 | -2.249336 | 2.590749  |
| H | -0.533206 | -2.662101 | 1.691501  |
| H | -1.140124 | -1.526782 | 2.611887  |
| O | 3.962512  | 1.149740  | -0.120791 |
| H | 4.866989  | 1.509977  | -0.165982 |
| H | 3.546579  | 1.338314  | -0.999678 |
| O | -1.720550 | 3.448993  | 0.004286  |
| H | -1.971964 | 4.389096  | -0.046114 |
| H | -0.792393 | 3.388574  | -0.349197 |

---

**Table S73.** MP2/6-31+G\*/PCM optimized Cartesian coordinates of the (H<sub>2</sub>O)<sub>18</sub> hollow clathrate in the undecahedron 4<sup>2</sup>5<sup>8</sup>6<sup>1</sup> configuration.

|   |           |           |           |
|---|-----------|-----------|-----------|
| O | 2.293037  | -2.386130 | 1.642592  |
| H | 1.486115  | -2.817253 | 1.252819  |
| H | 2.756137  | -3.092087 | 2.130520  |
| O | -2.427218 | -1.258536 | -2.597573 |
| H | -3.006501 | -1.424689 | -1.819243 |
| H | -2.357701 | -0.277031 | -2.643087 |
| O | 2.292099  | 1.599906  | -2.520042 |
| H | 2.906162  | 1.665557  | -1.753567 |
| H | 2.216883  | 0.632330  | -2.688683 |
| O | -2.234296 | 2.162164  | 2.023730  |
| H | -1.450555 | 2.653131  | 1.662425  |
| H | -2.661509 | 2.775920  | 2.649054  |
| O | -2.150544 | -2.420369 | 1.715110  |
| H | -1.885360 | -1.636910 | 2.261596  |
| H | -2.811650 | -2.082041 | 1.066677  |
| O | 2.262600  | -1.233226 | -2.782843 |
| H | 2.633270  | -1.617208 | -3.598040 |
| H | 1.407719  | -1.724395 | -2.614293 |
| O | -2.404412 | 1.584677  | -2.493622 |
| H | -2.809688 | 2.070765  | -3.234513 |
| H | -1.541434 | 2.052004  | -2.301295 |
| O | 2.216507  | 2.175744  | 1.910423  |
| H | 2.851140  | 1.928277  | 1.196702  |
| H | 2.000021  | 1.335316  | 2.377363  |
| O | 0.022243  | -3.453266 | 0.484597  |
| H | -0.039934 | -4.423648 | 0.555753  |
| H | -0.794872 | -3.095352 | 0.942880  |
| O | -0.015518 | -2.592193 | -2.230285 |
| H | -0.020104 | -2.898227 | -1.293966 |
| H | -0.864402 | -2.097000 | -2.357112 |
| O | -0.097743 | 2.868497  | -1.876971 |
| H | -0.048220 | 3.056666  | -0.911397 |
| H | 0.743098  | 2.395767  | -2.103431 |
| O | -3.969046 | -1.411288 | -0.199769 |
| H | -4.882169 | -1.751077 | -0.182932 |
| H | -4.038422 | -0.421515 | -0.090043 |
| O | 3.940299  | 1.439636  | -0.192945 |
| H | 4.009790  | 0.444007  | -0.218540 |
| H | 4.854828  | 1.775685  | -0.175090 |
| O | -0.002604 | 3.382873  | 0.922456  |
| H | 0.079471  | 4.334490  | 1.117784  |

|   |           |           |           |
|---|-----------|-----------|-----------|
| H | 0.823665  | 2.958747  | 1.295299  |
| O | 3.866212  | -1.271052 | -0.448311 |
| H | 3.327862  | -1.366534 | -1.268966 |
| H | 3.332800  | -1.685666 | 0.268616  |
| O | -3.905483 | 1.311024  | -0.103529 |
| H | -3.404124 | 1.511977  | -0.928334 |
| H | -3.340275 | 1.635614  | 0.635825  |
| O | 1.504742  | -0.233522 | 3.227682  |
| H | 1.811733  | -1.022369 | 2.711330  |
| H | 1.898895  | -0.331280 | 4.113908  |
| O | -1.340089 | -0.246777 | 3.248554  |
| H | -0.356207 | -0.211275 | 3.261755  |
| H | -1.632730 | 0.604011  | 2.848203  |

---

**Table S74.** MP2/6-31+G\*/PCM optimized Cartesian coordinates of the (H<sub>2</sub>O)<sub>19</sub> hollow clathrate in the undecahedron 4<sup>2</sup>5<sup>10</sup> configuration.

|   |           |           |           |
|---|-----------|-----------|-----------|
| O | 1.969578  | -2.058135 | -2.370883 |
| H | 2.721562  | -1.537163 | -1.990333 |
| H | 1.659411  | -2.648270 | -1.643785 |
| O | 2.349258  | 2.040960  | 2.147684  |
| H | 1.491437  | 1.811266  | 2.609483  |
| H | 2.838292  | 2.612763  | 2.767654  |
| O | -1.015058 | 3.677045  | -0.351654 |
| H | -0.017403 | 3.636594  | -0.280762 |
| H | -1.234771 | 4.613454  | -0.510444 |
| O | 3.914498  | -0.316107 | -1.399245 |
| H | 3.474499  | 0.499492  | -1.726559 |
| H | 3.859191  | -0.273220 | -0.416694 |
| O | 1.671006  | 3.394086  | -0.239556 |
| H | 1.943208  | 2.913057  | 0.577117  |
| H | 1.901390  | 2.806637  | -0.995562 |
| O | -1.704006 | 1.997642  | -2.527358 |
| H | -0.994115 | 1.331743  | -2.629873 |
| H | -1.423634 | 2.585024  | -1.787271 |
| O | 2.251204  | 1.748378  | -2.473767 |
| H | 1.504849  | 1.185458  | -2.790749 |
| H | 2.549615  | 2.253051  | -3.252655 |
| O | -3.821611 | 0.332772  | -1.722283 |
| H | -3.175284 | 1.026720  | -1.998923 |
| H | -3.379588 | -0.498916 | -2.024633 |
| O | -2.219614 | -1.785465 | -2.604814 |
| H | -1.400050 | -1.275950 | -2.775934 |
| H | -2.011909 | -2.374238 | -1.834860 |
| O | 1.089547  | -3.684581 | -0.234548 |
| H | 1.420233  | -3.268800 | 0.611646  |
| H | 1.433516  | -4.596347 | -0.235198 |
| O | -2.159102 | 2.495288  | 1.877883  |
| H | -1.783116 | 2.980211  | 1.097601  |
| H | -2.658118 | 3.161745  | 2.384994  |
| O | -3.755993 | 0.284287  | 1.052347  |
| H | -3.222681 | 1.066619  | 1.323353  |
| H | -3.796619 | 0.315973  | 0.060721  |
| O | 0.000456  | 1.387620  | 3.332310  |

|   |           |           |           |
|---|-----------|-----------|-----------|
| H | -0.768816 | 1.765436  | 2.844777  |
| H | -0.146506 | 0.413149  | 3.355328  |
| O | -0.351589 | -1.424331 | 3.372786  |
| H | -1.183259 | -1.665288 | 2.886104  |
| H | -0.468525 | -1.770481 | 4.276653  |
| O | 0.224136  | -0.163343 | -3.178912 |
| H | 0.838769  | -0.905285 | -2.890537 |
| H | 0.208820  | -0.209729 | -4.154174 |
| O | 3.657256  | -0.296125 | 1.430749  |
| H | 3.241393  | 0.554116  | 1.729801  |
| H | 4.504876  | -0.354228 | 1.908784  |
| O | 1.925242  | -2.461619 | 2.045606  |
| H | 2.521499  | -1.699625 | 1.858032  |
| H | 1.150856  | -2.089196 | 2.528383  |
| O | -1.717777 | -3.416806 | -0.416933 |
| H | -2.020506 | -2.959678 | 0.401288  |
| H | -0.747151 | -3.547769 | -0.308334 |
| O | -2.616663 | -2.022616 | 1.891698  |
| H | -3.298933 | -2.516265 | 2.382858  |
| H | -3.058570 | -1.173661 | 1.593826  |

---

**Table S75.** MP2/6-31+G\*/PCM optimized Cartesian coordinates of the (H<sub>2</sub>O)<sub>20</sub> hollow clathrate in the regular dodecahedron 5<sup>12</sup> configuration.

|   |           |           |           |
|---|-----------|-----------|-----------|
| O | -1.638592 | -3.482380 | -0.409326 |
| H | -0.900218 | -3.537482 | 0.239947  |
| H | -1.224521 | -3.191859 | -1.262696 |
| O | 2.647635  | 0.525845  | -2.785015 |
| H | 2.956419  | 0.957050  | -1.954738 |
| H | 1.796216  | 0.975792  | -3.026816 |
| O | -3.562384 | 0.366375  | -1.554931 |
| H | -3.568700 | -0.342344 | -0.869767 |
| H | -3.321703 | 1.198598  | -1.082844 |
| O | 0.434951  | 2.673478  | 2.809885  |
| H | 0.883650  | 2.987145  | 1.991416  |
| H | 0.904855  | 1.848266  | 3.073499  |
| O | 0.482166  | -3.594691 | 1.487829  |
| H | 1.332492  | -3.338660 | 1.046735  |
| H | 0.628446  | -4.493854 | 1.834909  |
| O | -2.256409 | 2.176150  | 2.335359  |
| H | -1.294356 | 2.332816  | 2.516809  |
| H | -2.413211 | 1.219581  | 2.509602  |
| O | 2.244553  | -2.117403 | -2.407738 |
| H | 2.415479  | -1.141378 | -2.563478 |
| H | 2.799258  | -2.588495 | -3.056503 |
| O | -0.211561 | -1.696405 | 3.470499  |
| H | 0.009513  | -2.371307 | 2.787186  |
| H | -1.094928 | -1.337295 | 3.220973  |
| O | -1.792575 | -0.224268 | -3.534700 |
| H | -2.466139 | -0.003629 | -2.830541 |
| H | -2.289274 | -0.263580 | -4.372140 |
| O | -0.424119 | 3.598047  | -1.530720 |



|   |           |           |           |
|---|-----------|-----------|-----------|
| H | 0.280007  | 3.617028  | -0.842858 |
| H | -1.250030 | 3.334152  | -1.062338 |
| O | -2.728913 | -0.591846 | 2.772258  |
| H | -3.066026 | -1.012402 | 1.938428  |
| H | -3.408733 | -0.769679 | 3.447931  |
| O | 3.539569  | 1.698284  | -0.356633 |
| H | 3.567790  | 0.973070  | 0.332184  |
| H | 4.451630  | 2.036550  | -0.420706 |
| O | -0.523094 | -2.644615 | -2.807243 |
| H | 0.435214  | -2.443664 | -2.700681 |
| H | -0.945099 | -1.800533 | -3.092302 |
| O | 3.549839  | -0.291874 | 1.485421  |
| H | 3.287134  | -1.148269 | 1.075479  |
| H | 2.905290  | -0.130075 | 2.214798  |
| O | 0.263236  | 1.740480  | -3.495246 |
| H | -0.005170 | 2.398977  | -2.806073 |
| H | -0.464006 | 1.077001  | -3.524405 |
| O | -3.529700 | -1.714409 | 0.367405  |
| H | -4.376771 | -2.195372 | 0.406109  |
| H | -2.846251 | -2.390555 | 0.083478  |
| O | 1.657267  | 3.590852  | 0.407288  |
| H | 2.099418  | 4.452634  | 0.516479  |
| H | 2.371117  | 2.958520  | 0.132724  |
| O | 2.809967  | -2.730237 | 0.226549  |
| H | 3.541511  | -3.374738 | 0.245714  |
| H | 2.642501  | -2.545678 | -0.736099 |
| O | -2.815384 | 2.759991  | -0.252815 |
| H | -3.515735 | 3.437743  | -0.258028 |
| H | -2.633007 | 2.567162  | 0.712186  |
| O | 1.690960  | 0.243668  | 3.541154  |
| H | 2.083099  | 0.240469  | 4.433352  |
| H | 0.993536  | -0.472045 | 3.548835  |

---

**Table S76.** MP2/6-31+G\*/PCM optimized Cartesian coordinates of the (H<sub>2</sub>O)<sub>20</sub> hollow clathrate in the irregular dodecahedron 4<sup>3</sup>5<sup>6</sup>6<sup>3</sup> configuration.

|   |           |           |           |
|---|-----------|-----------|-----------|
| O | 1.063194  | -1.865457 | -3.087217 |
| H | 0.302049  | -2.378964 | -2.730578 |
| H | 1.807181  | -1.994950 | -2.454928 |
| O | 2.192177  | 2.377446  | -2.175915 |
| H | 1.565101  | 1.808269  | -2.712908 |
| H | 2.709169  | 2.882488  | -2.830470 |
| O | -2.886825 | 0.137030  | 2.505835  |
| H | -2.046379 | -0.213613 | 2.883065  |
| H | -3.164244 | -0.501251 | 1.807385  |
| O | -1.684476 | -3.701570 | 0.448926  |
| H | -0.962539 | -3.476757 | 1.081255  |
| H | -2.408749 | -3.057641 | 0.625319  |
| O | -2.592615 | 2.715596  | 1.713783  |
| H | -2.735659 | 1.767228  | 1.994286  |
| H | -3.281658 | 3.235271  | 2.166041  |
| O | 2.977081  | -2.480657 | 1.305672  |
| H | 3.192214  | -1.580737 | 1.643935  |

|   |           |           |           |
|---|-----------|-----------|-----------|
| H | 2.070692  | -2.683867 | 1.635113  |
| O | -3.245522 | -1.200846 | -2.084406 |
| H | -2.537354 | -1.859075 | -2.272441 |
| H | -2.876522 | -0.320164 | -2.331026 |
| O | 3.953209  | 0.626845  | -0.808896 |
| H | 3.331575  | 1.233404  | -1.275708 |
| H | 3.758282  | -0.276861 | -1.149060 |
| O | 1.371682  | 1.191270  | 3.274122  |
| H | 2.152064  | 0.915532  | 2.739454  |
| H | 0.980520  | 1.980519  | 2.820853  |
| O | -2.203105 | 1.307177  | -2.862018 |
| H | -2.715349 | 1.667790  | -3.608729 |
| H | -2.196503 | 2.027762  | -2.170575 |
| O | 3.300315  | -2.079191 | -1.375197 |
| H | 3.155670  | -2.332149 | -0.421028 |
| H | 3.996424  | -2.674723 | -1.707343 |
| O | 3.622697  | 0.227213  | 1.870006  |
| H | 4.463420  | 0.422057  | 2.322655  |
| H | 3.761676  | 0.481169  | 0.914990  |
| O | 0.497509  | 0.804934  | -3.577945 |
| H | -0.445536 | 0.961714  | -3.337921 |
| H | 0.673022  | -0.152926 | -3.390874 |
| O | -0.446649 | -0.777827 | 3.622852  |
| H | -0.536680 | -0.901844 | 4.585705  |
| H | 0.235085  | -0.051952 | 3.507955  |
| O | 0.378532  | -3.068086 | 2.292975  |
| H | 0.085728  | -2.272936 | 2.811155  |
| H | 0.451995  | -3.787520 | 2.947019  |
| O | 0.625643  | 4.047869  | -0.610776 |
| H | 1.222599  | 3.483829  | -1.168811 |
| H | 0.871670  | 4.969849  | -0.809038 |
| O | -1.249385 | -3.222595 | -2.204278 |
| H | -1.327761 | -3.475527 | -1.242445 |
| H | -1.446299 | -4.031872 | -2.710067 |
| O | 0.135756  | 3.399091  | 2.123517  |
| H | 0.408821  | 3.629696  | 1.207021  |
| H | -0.825442 | 3.195456  | 2.052737  |
| O | -2.086559 | 3.295487  | -1.006951 |
| H | -2.354371 | 3.055664  | -0.089284 |
| H | -1.154367 | 3.603617  | -0.925274 |
| O | -3.712745 | -1.714791 | 0.552588  |
| H | -4.637660 | -2.000891 | 0.663614  |
| H | -3.621205 | -1.446607 | -0.404461 |

**Table S77.** MP2/6-31+G\*/PCM optimized Cartesian coordinates of the (H<sub>2</sub>O)<sub>22</sub> hollow clathrate in the tridecahedron 4<sup>15</sup>8<sup>6</sup>2 configuration.

|   |           |           |           |
|---|-----------|-----------|-----------|
| O | 1.947493  | -3.764351 | 0.354454  |
| H | 2.221841  | -3.188929 | 1.106399  |
| H | 2.282894  | -3.318025 | -0.456588 |
| O | -1.722034 | -3.022190 | -2.094723 |
| H | -1.391574 | -3.409986 | -1.231037 |
| H | -1.939399 | -3.788535 | -2.657153 |
| O | -1.786392 | 2.995290  | 1.989588  |

|   |           |           |           |
|---|-----------|-----------|-----------|
| H | -1.359852 | 3.379751  | 1.188505  |
| H | -1.082746 | 2.497499  | 2.468702  |
| O | 2.666234  | 2.365625  | 2.169878  |
| H | 2.436562  | 2.872833  | 1.357670  |
| H | 1.808305  | 2.144305  | 2.601331  |
| O | -4.002699 | 1.606508  | 1.263986  |
| H | -3.194084 | 2.107492  | 1.569726  |
| H | -4.765923 | 2.066512  | 1.658090  |
| O | 2.791877  | 1.964896  | -2.310025 |
| H | 1.956265  | 1.675009  | -2.747301 |
| H | 2.524703  | 2.601243  | -1.606198 |
| O | 0.202534  | -1.070895 | 3.545471  |
| H | 1.034561  | -1.457314 | 3.183095  |
| H | -0.539984 | -1.569080 | 3.130090  |
| O | 0.438359  | -1.645754 | -3.310260 |
| H | -0.313408 | -2.106936 | -2.869635 |
| H | 1.255547  | -1.960062 | -2.857685 |
| O | -1.623400 | 2.660741  | -2.448100 |
| H | -0.955418 | 2.038442  | -2.819011 |
| H | -2.400354 | 2.113522  | -2.168357 |
| O | -1.921239 | -2.564571 | 2.423114  |
| H | -2.299541 | -3.153519 | 3.101397  |
| H | -2.694103 | -2.046206 | 2.060486  |
| O | 2.823752  | -2.457348 | -2.016558 |
| H | 3.352369  | -1.647766 | -1.791328 |
| H | 3.404068  | -2.999879 | -2.581444 |
| O | 0.427858  | 1.061483  | -3.570486 |
| H | 0.459109  | 1.219693  | -4.531785 |
| H | 0.390255  | 0.068770  | -3.468297 |
| O | -0.813524 | -4.014974 | 0.250887  |
| H | -1.183009 | -3.522420 | 1.020757  |
| H | 0.171464  | -3.916040 | 0.310534  |
| O | -0.673773 | 4.102732  | -0.368135 |
| H | -0.963807 | 5.023712  | -0.502515 |
| H | -1.030319 | 3.588741  | -1.151270 |
| O | 2.067559  | 3.756079  | -0.236735 |
| H | 1.094948  | 3.947772  | -0.292926 |
| H | 2.509921  | 4.621454  | -0.311961 |
| O | -3.983109 | -1.539974 | -1.481770 |
| H | -3.194878 | -2.082473 | -1.746839 |
| H | -4.751571 | -1.968693 | -1.900762 |
| O | 2.634698  | -2.079408 | 2.523229  |
| H | 3.173798  | -1.309312 | 2.179505  |
| H | 3.189839  | -2.508769 | 3.199453  |
| O | -3.880716 | 1.307037  | -1.562982 |
| H | -3.893345 | 0.326750  | -1.645027 |
| H | -3.968909 | 1.476418  | -0.596688 |
| O | -4.024683 | -1.218753 | 1.342467  |
| H | -4.001233 | -0.236273 | 1.417513  |
| H | -4.053970 | -1.396138 | 0.373883  |
| O | 0.229030  | 1.645792  | 3.435315  |
| H | 0.213409  | 1.939372  | 4.364551  |
| H | 0.183135  | 0.648647  | 3.471635  |
| O | 4.028513  | 0.028945  | 1.542162  |
| H | 3.550297  | 0.873280  | 1.746201  |
| H | 4.087889  | -0.014623 | 0.559810  |
| O | 4.163479  | -0.141587 | -1.294289 |
| H | 3.679652  | 0.644236  | -1.681766 |

H 5.078051 -0.077069 -1.625667

---

**Table S78.** MP2/6-31+G\*/PCM optimized Cartesian coordinates of the (H<sub>2</sub>O)<sub>24</sub> hollow clathrate in the tetradecahedron 5<sup>12</sup>6<sup>2</sup> configuration.

|   |           |           |           |
|---|-----------|-----------|-----------|
| O | 1.988800  | -1.951760 | -3.045629 |
| H | 2.394140  | -2.292692 | -3.863871 |
| H | 2.209194  | -0.977628 | -3.027759 |
| O | 4.355608  | 1.241679  | -0.755565 |
| H | 5.248212  | 1.526165  | -1.024782 |
| H | 3.984711  | 1.993346  | -0.223059 |
| O | 2.669220  | 0.677588  | -2.965582 |
| H | 3.247614  | 0.902106  | -2.200036 |
| H | 1.958631  | 1.361345  | -2.981901 |
| O | 4.311179  | -1.157983 | 0.765716  |
| H | 3.762282  | -0.980608 | 1.564747  |
| H | 4.342777  | -0.308936 | 0.267826  |
| O | 2.685027  | -0.726508 | 3.051648  |
| H | 1.957068  | -1.410224 | 3.033336  |
| H | 3.175563  | -0.893098 | 3.877223  |
| O | -1.102173 | -4.391711 | -0.759630 |
| H | -1.300107 | -5.307436 | -1.028849 |
| H | -0.266410 | -4.445039 | -0.225962 |
| O | -0.745620 | -2.647875 | -2.968122 |
| H | -0.840780 | -3.261982 | -2.203383 |
| H | 0.201863  | -2.374510 | -2.983851 |
| O | 1.219424  | -4.346486 | 0.741121  |
| H | 1.947535  | -3.933764 | 0.188447  |
| H | 1.555822  | -5.220103 | 1.013140  |
| O | 3.136929  | -3.165971 | -0.747077 |
| H | 2.752396  | -2.739184 | -1.548186 |
| H | 3.561238  | -2.434920 | -0.228299 |
| O | 1.908263  | 1.987905  | 2.963807  |
| H | 2.152882  | 1.032672  | 2.969563  |
| H | 2.368875  | 2.389419  | 2.190416  |
| O | 0.766344  | -2.649342 | 2.963431  |
| H | -0.183230 | -2.383497 | 2.968416  |
| H | 0.884542  | -3.248114 | 2.189460  |
| O | 0.699509  | 2.697708  | -3.044807 |
| H | 0.791961  | 3.218550  | -3.863464 |
| H | -0.254223 | 2.401530  | -3.026386 |
| O | -2.682283 | -0.743477 | -3.045580 |
| H | -3.178952 | -0.923424 | -3.864692 |
| H | -1.948570 | -1.421071 | -3.027582 |
| O | -3.159249 | -3.155043 | 0.761237  |
| H | -2.440506 | -3.607037 | 0.262390  |
| H | -2.730093 | -2.769231 | 1.560093  |
| O | -4.310715 | -1.132582 | -0.749642 |
| H | -3.748132 | -1.012466 | -1.550179 |
| H | -3.889940 | -1.865775 | -0.230947 |
| O | -4.376734 | 1.117340  | 0.740090  |
| H | -4.382900 | 0.280828  | 0.186818  |
| H | -5.301693 | 1.262029  | 1.011930  |
| O | -3.253265 | 3.152146  | -0.758004 |

|   |           |           |           |
|---|-----------|-----------|-----------|
| H | -3.719221 | 2.455009  | -0.226127 |
| H | -3.945661 | 3.782740  | -1.028341 |
| O | -0.716570 | 2.687089  | 3.049783  |
| H | -0.818229 | 3.195703  | 3.874974  |
| H | 0.239553  | 2.398630  | 3.032341  |
| O | 1.175152  | 4.299930  | -0.746620 |
| H | 0.999141  | 3.753789  | -1.548182 |
| H | 0.329016  | 4.301363  | -0.229250 |
| O | 3.154745  | 3.229878  | 0.744014  |
| H | 2.433800  | 3.654036  | 0.190656  |
| H | 3.742382  | 3.958106  | 1.017364  |
| O | -1.152567 | 4.311675  | 0.763605  |
| H | -1.903959 | 3.915943  | 0.265011  |
| H | -1.032912 | 3.746697  | 1.562157  |
| O | -2.679833 | 0.658227  | 2.961453  |
| H | -3.257695 | 0.856053  | 2.187853  |
| H | -1.974737 | 1.347570  | 2.966925  |
| O | -1.973076 | -1.964696 | 3.048762  |
| H | -2.363962 | -2.306641 | 3.873538  |
| H | -2.201227 | -0.992434 | 3.030753  |
| O | -1.918082 | 1.972239  | -2.964528 |
| H | -2.155325 | 1.015054  | -2.981310 |
| H | -2.403002 | 2.361358  | -2.200029 |

---

**Table S79.** MP2/6-31+G\*/PCM optimized Cartesian coordinates of the (H<sub>2</sub>O)<sub>24</sub> hollow clathrate in the tetradecahedron 4<sup>15</sup>10<sup>6</sup>3 configuration.

|   |           |           |           |
|---|-----------|-----------|-----------|
| O | 0.791964  | -2.084995 | -3.397397 |
| H | 0.942054  | -2.476272 | -4.277351 |
| H | 1.283642  | -1.215696 | -3.407164 |
| O | 4.407626  | 0.101911  | -1.626399 |
| H | 5.260671  | 0.170525  | -2.093135 |
| H | 4.386929  | 0.868785  | -0.996106 |
| O | 2.202619  | 0.238476  | -3.408845 |
| H | 2.966731  | 0.221666  | -2.786843 |
| H | 1.723893  | 1.082544  | -3.232463 |
| O | 4.070246  | -2.358119 | -0.238429 |
| H | 3.854544  | -2.136645 | 0.696300  |
| H | 4.213561  | -1.495877 | -0.691752 |
| O | 3.373432  | -1.760267 | 2.451469  |
| H | 2.464454  | -2.100292 | 2.661261  |
| H | 3.964176  | -2.173092 | 3.107800  |
| O | -2.434314 | -3.563375 | -0.512987 |
| H | -2.782489 | -4.441639 | -0.753890 |
| H | -1.560017 | -3.739830 | -0.055272 |
| O | -1.971544 | -2.007296 | -2.840682 |
| H | -2.103419 | -2.555846 | -2.032415 |
| H | -1.001132 | -2.005403 | -3.017504 |
| O | -0.039384 | -4.050975 | 0.631406  |
| H | 0.674490  | -3.910818 | -0.044086 |
| H | 0.218433  | -3.519558 | 1.419615  |
| O | 1.886274  | -3.708211 | -1.324905 |
| H | 1.529873  | -3.145794 | -2.050437 |
| H | 2.671356  | -3.220691 | -0.969195 |

|   |           |           |           |
|---|-----------|-----------|-----------|
| O | 3.371035  | 1.066548  | 2.651023  |
| H | 3.396429  | 0.085598  | 2.559362  |
| H | 3.672795  | 1.432391  | 1.786584  |
| O | 0.782152  | -2.628402 | 2.952992  |
| H | 0.239874  | -1.831190 | 3.224173  |
| H | 0.740278  | -3.239246 | 3.711790  |
| O | 0.895918  | 2.695936  | -2.941997 |
| H | 1.000922  | 3.284593  | -3.711704 |
| H | -0.086799 | 2.663289  | -2.766084 |
| O | -3.310091 | 0.352948  | -2.788409 |
| H | -3.808221 | 0.393088  | -3.625222 |
| H | -2.793016 | -0.501241 | -2.826762 |
| O | -4.258471 | -2.086646 | 0.955087  |
| H | -3.609945 | -2.657562 | 0.466140  |
| H | -4.960779 | -2.688910 | 1.261497  |
| O | -5.002354 | 0.222804  | -0.524735 |
| H | -4.434039 | 0.259995  | -1.330508 |
| H | -4.797443 | -0.640040 | -0.095809 |
| O | -4.164007 | 1.998943  | 1.353833  |
| H | -4.535171 | 1.418684  | 0.628973  |
| H | -4.928770 | 2.460121  | 1.744948  |
| O | -2.321780 | 3.698073  | 0.181811  |
| H | -2.998026 | 3.126892  | 0.631722  |
| H | -2.727814 | 4.582649  | 0.126290  |
| O | 0.876055  | 1.931015  | 3.318079  |
| H | 0.959735  | 2.380389  | 4.179109  |
| H | 1.799413  | 1.625860  | 3.088875  |
| O | 2.159301  | 3.774780  | -0.636813 |
| H | 1.715064  | 3.410059  | -1.437634 |
| H | 1.459415  | 3.817356  | 0.064414  |
| O | 4.181187  | 2.186056  | 0.181484  |
| H | 3.450178  | 2.799013  | -0.128087 |
| H | 4.975004  | 2.744581  | 0.272436  |
| O | 0.248947  | 3.896512  | 1.371172  |
| H | -0.664551 | 3.773419  | 1.025376  |
| H | 0.393940  | 3.191263  | 2.044038  |
| O | -3.252869 | -0.243904 | 2.885455  |
| H | -3.524633 | 0.595990  | 2.450840  |
| H | -3.556674 | -0.948468 | 2.268881  |
| O | -0.613957 | -0.446259 | 3.724641  |
| H | -1.537553 | -0.340230 | 3.383861  |
| H | -0.145958 | 0.403910  | 3.551954  |
| O | -1.769311 | 2.688930  | -2.414378 |
| H | -2.285428 | 1.857361  | -2.535481 |
| H | -1.985385 | 3.018460  | -1.511143 |

**Table S80.** MP2/6-31+G\*/PCM optimized Cartesian coordinates of the (H<sub>2</sub>O)<sub>26</sub> hollow clathrate in the pentadecahedron 5<sup>12</sup>6<sup>3</sup> configuration.

|   |          |          |           |
|---|----------|----------|-----------|
| O | 4.104752 | 2.308441 | -1.139942 |
| H | 4.823665 | 2.927490 | -1.362640 |
| H | 3.530253 | 2.788532 | -0.478793 |
| O | 2.371907 | 2.106559 | 3.087952  |
| H | 2.771243 | 2.655901 | 3.787424  |

|   |           |           |           |
|---|-----------|-----------|-----------|
| H | 1.487087  | 1.833734  | 3.445938  |
| O | 2.502515  | 3.563747  | 0.663182  |
| H | 2.366293  | 3.056435  | 1.496779  |
| H | 1.608313  | 3.773245  | 0.306376  |
| O | 3.969441  | -0.202917 | 2.595654  |
| H | 3.389973  | -0.993420 | 2.698365  |
| H | 3.398904  | 0.576674  | 2.786423  |
| O | 2.345813  | -2.517918 | 2.814879  |
| H | 2.318840  | -2.956301 | 1.917525  |
| H | 2.738691  | -3.178104 | 3.414616  |
| O | 2.475033  | -1.273083 | -3.490907 |
| H | 2.905464  | -1.529127 | -4.327381 |
| H | 3.065503  | -1.625276 | -2.774738 |
| O | 2.469322  | 1.570430  | -3.327751 |
| H | 2.461635  | 0.586478  | -3.365888 |
| H | 3.069789  | 1.806782  | -2.582827 |
| O | 4.028292  | -2.212714 | -1.393233 |
| H | 4.408607  | -1.440182 | -0.879206 |
| H | 4.795277  | -2.745305 | -1.673417 |
| O | 4.991910  | -0.118755 | 0.014102  |
| H | 4.703258  | 0.738459  | -0.378173 |
| H | 4.627451  | -0.128262 | 0.936192  |
| O | -0.104080 | -1.606505 | 3.873515  |
| H | 0.741001  | -1.913340 | 3.468295  |
| H | -0.042860 | -0.625053 | 3.940627  |
| O | 2.352454  | -3.676015 | 0.358424  |
| H | 1.488366  | -3.826396 | -0.092413 |
| H | 2.914047  | -3.175982 | -0.279050 |
| O | -2.348420 | 3.683001  | 0.669033  |
| H | -2.827332 | 4.505066  | 0.883078  |
| H | -2.919729 | 3.212224  | -0.004799 |
| O | -2.309672 | 1.630004  | -3.398565 |
| H | -2.681978 | 1.981913  | -4.227727 |
| H | -1.418348 | 2.073104  | -3.300138 |
| O | -0.049221 | -2.574978 | -3.313569 |
| H | 0.821054  | -2.116146 | -3.356976 |
| H | -0.021665 | -3.135391 | -2.503566 |
| O | -2.448186 | -1.197688 | -3.474311 |
| H | -2.314837 | -0.221836 | -3.440327 |
| H | -1.550639 | -1.613550 | -3.419377 |
| O | -4.053556 | -2.111641 | -1.502860 |
| H | -3.473080 | -1.776973 | -2.248606 |
| H | -4.731285 | -2.669627 | -1.926777 |
| O | -5.046326 | 0.047393  | -0.085670 |
| H | -4.753428 | -0.742842 | -0.610790 |
| H | -6.019575 | 0.052277  | -0.139597 |
| O | -2.461038 | -2.437015 | 2.810776  |
| H | -2.837930 | -3.053867 | 3.464468  |
| H | -1.577673 | -2.159274 | 3.185547  |
| O | -2.360162 | 2.094066  | 3.030184  |
| H | -2.327089 | 2.630249  | 2.204404  |
| H | -2.960732 | 1.329319  | 2.835565  |
| O | -0.047026 | 1.218959  | 4.116257  |
| H | -0.884280 | 1.571233  | 3.693443  |
| H | -0.117398 | 1.454882  | 5.059709  |
| O | -4.019490 | -0.080705 | 2.559669  |
| H | -4.391919 | -0.070998 | 1.648132  |
| H | -3.505359 | -0.918398 | 2.631064  |

|   |           |           |           |
|---|-----------|-----------|-----------|
| O | -2.436513 | -3.635182 | 0.254622  |
| H | -3.015582 | -3.084282 | -0.322184 |
| H | -2.421853 | -3.195696 | 1.137322  |
| O | -0.079622 | -4.187675 | -0.978452 |
| H | -0.128902 | -5.135087 | -1.201889 |
| H | -0.929191 | -3.985979 | -0.493122 |
| O | -3.864804 | 2.383424  | -1.166012 |
| H | -3.341090 | 2.102536  | -1.953976 |
| H | -4.281656 | 1.564001  | -0.810366 |
| O | 0.060664  | 4.275039  | -0.576152 |
| H | 0.061362  | 5.238785  | -0.723391 |
| H | -0.794674 | 4.083786  | -0.109461 |
| O | 0.054471  | 2.913722  | -3.075743 |
| H | 0.899867  | 2.401634  | -3.147568 |
| H | 0.086495  | 3.375999  | -2.206783 |

---

**Table S81.** MP2/6-31+G\*/PCM optimized Cartesian coordinates of the (H<sub>2</sub>O)<sub>26</sub> hollow clathrate in the pentadecahedron 4<sup>15</sup>10<sup>6</sup>4 configuration.

|   |           |           |           |
|---|-----------|-----------|-----------|
| O | -2.669976 | -3.886660 | -0.371957 |
| H | -3.072410 | -4.769790 | -0.460619 |
| H | -1.754904 | -4.041916 | -0.002035 |
| O | 0.095806  | -2.818678 | 3.081614  |
| H | 0.142257  | -3.502834 | 3.774882  |
| H | 0.925323  | -2.270989 | 3.202152  |
| O | -0.173925 | -4.238277 | 0.642543  |
| H | -0.003439 | -3.699059 | 1.449750  |
| H | 0.539428  | -4.025878 | -0.002914 |
| O | -2.273213 | -1.394444 | 3.406009  |
| H | -2.614443 | -1.660522 | 4.279596  |
| H | -1.410474 | -1.875493 | 3.307961  |
| O | -2.262837 | 1.462175  | 3.329839  |
| H | -2.920645 | 1.716550  | 2.634886  |
| H | -2.228644 | 0.479060  | 3.324781  |
| O | -3.809762 | 0.002778  | -2.545855 |
| H | -4.519013 | 0.007287  | -3.214780 |
| H | -4.277119 | -0.002233 | -1.670208 |
| O | -2.391215 | -2.456434 | -2.799939 |
| H | -2.866496 | -1.600602 | -2.693909 |
| H | -2.531536 | -2.950064 | -1.958735 |
| O | -4.989435 | -0.005276 | -0.032732 |
| H | -4.673100 | -0.804428 | 0.480302  |
| H | -5.962280 | -0.066479 | -0.042321 |
| O | -4.075919 | -2.149475 | 1.348138  |
| H | -3.587704 | -2.778225 | 0.765190  |
| H | -3.443589 | -1.901548 | 2.062751  |
| O | 2.384798  | 1.458325  | 3.586483  |
| H | 1.551201  | 1.956924  | 3.351176  |
| H | 2.665172  | 1.815744  | 4.448583  |
| O | -4.066181 | 2.282932  | 1.368516  |
| H | -3.585057 | 2.854166  | 0.727286  |
| H | -4.400352 | 1.515511  | 0.849425  |
| O | 4.043368  | -2.363477 | -0.944973 |
| H | 4.827392  | -2.859325 | -1.245199 |



|   |           |           |           |
|---|-----------|-----------|-----------|
| H | 4.015715  | -1.540443 | -1.513529 |
| O | 1.570285  | -0.083707 | -4.010842 |
| H | 1.765110  | -0.117285 | -4.965236 |
| H | 1.069550  | -0.926640 | -3.812253 |
| O | -2.317155 | 2.412322  | -2.806316 |
| H | -2.822198 | 1.574085  | -2.695323 |
| H | -2.458360 | 2.925938  | -1.978344 |
| O | 0.392741  | 2.408255  | -3.385801 |
| H | 0.730149  | 1.503014  | -3.581444 |
| H | -0.574367 | 2.321904  | -3.188237 |
| O | 1.748221  | 3.744812  | -1.481005 |
| H | 1.245202  | 3.245064  | -2.192170 |
| H | 2.018307  | 4.583472  | -1.899879 |
| O | 4.039293  | 2.261568  | -0.917594 |
| H | 3.232073  | 2.810277  | -1.095271 |
| H | 4.790404  | 2.811366  | -1.207659 |
| O | 0.122607  | 2.820314  | 2.985505  |
| H | 0.078379  | 3.295216  | 2.125311  |
| H | -0.727192 | 2.316668  | 3.074556  |
| O | 4.516085  | -1.465132 | 1.719672  |
| H | 4.340148  | -1.788693 | 0.806846  |
| H | 4.608208  | -0.483006 | 1.639586  |
| O | 2.351095  | -1.380528 | 3.467621  |
| H | 3.093343  | -1.514372 | 2.824473  |
| H | 2.270956  | -0.402146 | 3.553525  |
| O | 4.529260  | 1.328401  | 1.724478  |
| H | 4.292989  | 1.702942  | 0.845644  |
| H | 3.758502  | 1.493826  | 2.314465  |
| O | -0.031605 | 4.336781  | 0.571224  |
| H | 0.625556  | 4.128657  | -0.143752 |
| H | 0.135199  | 5.267480  | 0.810088  |
| O | -2.606523 | 3.936134  | -0.424160 |
| H | -3.015413 | 4.807688  | -0.576829 |
| H | -1.701360 | 4.126517  | -0.067649 |
| O | 3.931637  | -0.119123 | -2.465038 |
| H | 3.109528  | -0.078225 | -3.009438 |
| H | 3.951057  | 0.713063  | -1.937280 |
| O | 1.721872  | -3.807365 | -1.415762 |
| H | 2.003742  | -4.681680 | -1.742315 |
| H | 2.564084  | -3.314459 | -1.231405 |
| O | 0.306197  | -2.413381 | -3.453111 |
| H | -0.651877 | -2.393650 | -3.200822 |
| H | 0.768854  | -2.905148 | -2.736112 |

**Table S82.** MP2/6-31+G\*/PCM optimized Cartesian coordinates of the (H<sub>2</sub>O)<sub>28</sub> hollow clathrate in the hexadecahedron 5<sup>12</sup>6<sup>4</sup>-T<sub>d</sub> configuration.

|   |           |           |           |
|---|-----------|-----------|-----------|
| O | -0.477096 | -4.775944 | 0.790598  |
| H | -1.296415 | -4.478647 | 0.315552  |
| H | -0.589211 | -5.734537 | 0.927882  |
| O | -0.162467 | 0.824832  | -4.731513 |
| H | -0.103129 | 1.686837  | -4.259196 |
| H | -1.016989 | 0.423717  | -4.448855 |
| O | -3.667082 | 2.333596  | 2.175785  |

|   |           |           |           |
|---|-----------|-----------|-----------|
| H | -4.418565 | 2.774601  | 2.612845  |
| H | -4.071733 | 1.687036  | 1.540736  |
| O | 4.253879  | 1.559858  | 1.733829  |
| H | 3.754438  | 2.322164  | 1.359094  |
| H | 3.708555  | 1.212420  | 2.476788  |
| O | 0.501843  | 4.017224  | 2.064183  |
| H | 1.313640  | 3.902152  | 1.517569  |
| H | 0.546763  | 3.329304  | 2.767015  |
| O | 0.508121  | 2.062294  | 4.137176  |
| H | 0.609564  | 2.499291  | 5.002727  |
| H | 1.285141  | 1.448911  | 4.063408  |
| O | -1.837980 | -2.938608 | -2.952676 |
| H | -0.860559 | -3.003078 | -3.068624 |
| H | -2.095517 | -2.036820 | -3.258010 |
| O | -3.922437 | -1.963884 | 1.225490  |
| H | -3.363196 | -1.924133 | 2.037058  |
| H | -3.467474 | -2.573972 | 0.599301  |
| O | -2.397034 | -1.751002 | 3.594897  |
| H | -2.247725 | -0.779454 | 3.772056  |
| H | -2.901282 | -2.079094 | 4.361766  |
| O | 3.821630  | 0.608103  | -2.621703 |
| H | 4.125794  | 0.221525  | -1.750334 |
| H | 4.633410  | 0.729421  | -3.147319 |
| O | 3.650599  | -2.810122 | 0.740134  |
| H | 2.992630  | -3.299276 | 0.169782  |
| H | 4.387925  | -3.433334 | 0.874179  |
| O | 2.429541  | -2.163415 | 3.220738  |
| H | 2.839503  | -2.396719 | 2.355176  |
| H | 1.518371  | -2.552666 | 3.205597  |
| O | -2.190266 | 3.693104  | -1.840963 |
| H | -2.068459 | 3.873015  | -0.862704 |
| H | -2.690770 | 4.457261  | -2.182016 |
| O | -0.084664 | -3.339922 | 3.214411  |
| H | -0.254547 | -3.839967 | 2.383434  |
| H | -0.872281 | -2.762385 | 3.344601  |
| O | 0.102846  | 3.304104  | -3.356432 |
| H | 0.133525  | 4.052885  | -3.979911 |
| H | -0.692191 | 3.472538  | -2.786461 |
| O | -4.676764 | 0.487740  | 0.360372  |
| H | -4.394715 | -0.427921 | 0.648518  |
| H | -5.651371 | 0.466042  | 0.345857  |
| O | 4.669291  | -0.356327 | -0.236830 |
| H | 4.285156  | -1.207351 | 0.078471  |
| H | 4.508772  | 0.302947  | 0.485642  |
| O | -2.710768 | -3.810286 | -0.545346 |
| H | -2.408652 | -3.461694 | -1.433410 |
| H | -3.362839 | -4.505972 | -0.748713 |
| O | 2.871965  | 3.734313  | 0.547251  |
| H | 3.399974  | 4.552909  | 0.576864  |
| H | 2.758789  | 3.525094  | -0.422660 |
| O | 1.957919  | -0.871079 | -4.152263 |
| H | 1.217528  | -0.239633 | -4.340874 |
| H | 2.597318  | -0.381155 | -3.584321 |
| O | -2.077332 | 0.910287  | 4.039687  |
| H | -2.597755 | 1.438693  | 3.390883  |
| H | -1.167038 | 1.287697  | 4.040508  |
| O | 1.838337  | -4.191004 | -0.741245 |
| H | 1.016508  | -4.394204 | -0.237057 |

|   |           |           |           |
|---|-----------|-----------|-----------|
| H | 1.544024  | -3.820186 | -1.606600 |
| O | -1.968291 | 4.149837  | 0.811092  |
| H | -2.550486 | 3.525411  | 1.302346  |
| H | -1.074282 | 4.077707  | 1.232625  |
| O | 2.742253  | 0.439876  | 3.865677  |
| H | 3.273388  | 0.429864  | 4.683133  |
| H | 2.592338  | -0.523417 | 3.635390  |
| O | -2.592560 | -0.392968 | -3.904547 |
| H | -3.221707 | -0.479577 | -4.643915 |
| H | -3.034538 | 0.218475  | -3.250204 |
| O | 0.964392  | -3.216075 | -3.239032 |
| H | 1.173102  | -3.866982 | -3.933917 |
| H | 1.362649  | -2.353975 | -3.555609 |
| O | -3.752860 | 1.348269  | -2.173862 |
| H | -3.212872 | 2.158493  | -2.019704 |
| H | -4.039480 | 1.031859  | -1.285624 |
| O | 2.630406  | 3.115935  | -2.087557 |
| H | 3.008373  | 2.230434  | -2.302109 |
| H | 1.735215  | 3.147543  | -2.497470 |

---

**Table S83.** MP2/6-31+G\*/PCM optimized Cartesian coordinates of the (H<sub>2</sub>O)<sub>28</sub> hollow clathrate in the hexadecahedron 5<sup>12</sup>6<sup>4</sup>-D<sub>2</sub> configuration.

|   |           |           |          |
|---|-----------|-----------|----------|
| O | 2.928245  | 3.501383  | 1.536117 |
| H | 1.972222  | 3.732521  | 1.586277 |
| H | 3.041624  | 2.663248  | 2.041674 |
| O | 0.226885  | 4.362144  | 1.513852 |
| H | -0.460981 | 3.848125  | 2.023745 |
| H | 0.193175  | 5.266165  | 1.876727 |
| O | -1.729655 | 3.012409  | 2.834350 |
| H | -1.559650 | 2.096685  | 3.158412 |
| H | -2.527554 | 2.961865  | 2.258476 |
| O | 3.433712  | 1.081631  | 2.923417 |
| H | 3.946596  | 1.279737  | 3.728344 |
| H | 4.051921  | 0.556336  | 2.336850 |
| O | 1.243352  | -0.554709 | 3.634932 |
| H | 1.420681  | -1.460043 | 3.289277 |
| H | 2.004978  | 0.008211  | 3.358997 |
| O | -1.282584 | 0.417138  | 3.872754 |
| H | -1.408202 | 0.469557  | 4.837980 |
| H | -0.357270 | 0.065034  | 3.751806 |
| O | 4.008207  | -2.985946 | 1.091021 |
| H | 3.236265  | -3.097599 | 1.704778 |
| H | 4.640826  | -3.685935 | 1.335864 |
| O | 5.058598  | -0.357730 | 1.296747 |
| H | 5.065939  | 0.015311  | 0.376781 |
| H | 4.716615  | -1.277366 | 1.212492 |
| O | -3.982533 | 2.994033  | 1.119464 |
| H | -3.700075 | 3.174434  | 0.185293 |
| H | -4.625038 | 3.693454  | 1.338966 |
| O | -5.046635 | 0.369337  | 1.314804 |
| H | -4.705500 | 1.288811  | 1.225022 |
| H | -5.080747 | 0.007831  | 0.399554 |
| O | -3.368377 | -1.217082 | 2.856178 |

|   |           |           |           |
|---|-----------|-----------|-----------|
| H | -3.945688 | -0.618659 | 2.316263  |
| H | -2.617231 | -0.663588 | 3.173661  |
| O | -3.096836 | 3.369332  | -1.486854 |
| H | -3.619462 | 4.024198  | -1.985398 |
| H | -3.205139 | 2.508656  | -1.984835 |
| O | -0.445533 | 4.332703  | -1.234200 |
| H | -0.236145 | 4.338856  | -0.270276 |
| H | -1.355427 | 3.963454  | -1.316391 |
| O | 1.528153  | 3.267226  | -2.769602 |
| H | 0.778353  | 3.642771  | -2.227553 |
| H | 1.644957  | 3.885728  | -3.513703 |
| O | -3.463894 | 1.033107  | -2.809257 |
| H | -2.681587 | 0.530188  | -3.138312 |
| H | -4.009814 | 0.387101  | -2.303535 |
| O | -1.264608 | -0.436361 | -3.827714 |
| H | -1.433375 | -0.547770 | -4.781538 |
| H | -1.325976 | -1.356863 | -3.445276 |
| O | 1.359190  | 0.613186  | -3.703563 |
| H | 0.435364  | 0.269748  | -3.685769 |
| H | 1.333999  | 1.535012  | -3.354701 |
| O | -5.063734 | -0.752928 | -1.295674 |
| H | -4.654130 | -1.653930 | -1.237181 |
| H | -5.952252 | -0.892699 | -1.671520 |
| O | 5.083494  | 0.739907  | -1.247334 |
| H | 4.633301  | 1.622553  | -1.216195 |
| H | 4.549870  | 0.193834  | -1.869017 |
| O | 3.833484  | 3.219370  | -1.086314 |
| H | 3.039147  | 3.250611  | -1.667245 |
| H | 3.491957  | 3.331266  | -0.163758 |
| O | 3.517430  | -0.878485 | -2.997126 |
| H | 2.704120  | -0.360188 | -3.253131 |
| H | 3.982442  | -1.059802 | -3.834177 |
| O | -1.523075 | -2.946813 | -2.810641 |
| H | -2.286408 | -3.049567 | -2.196914 |
| H | -0.760163 | -3.386804 | -2.366493 |
| O | -3.762381 | -3.201846 | -1.078651 |
| H | -4.309188 | -3.977541 | -1.302476 |
| H | -3.468643 | -3.344154 | -0.139752 |
| O | 1.773557  | -3.185762 | 2.726024  |
| H | 1.034940  | -3.601151 | 2.194093  |
| H | 1.905729  | -3.773810 | 3.492372  |
| O | -0.159441 | -4.340785 | 1.222731  |
| H | -1.081144 | -4.003051 | 1.311282  |
| H | 0.055553  | -4.322653 | 0.260227  |
| O | -2.845615 | -3.500569 | 1.516123  |
| H | -3.320335 | -4.193528 | 2.011308  |
| H | -3.005686 | -2.652744 | 2.026532  |
| O | 0.578395  | -4.301669 | -1.505804 |
| H | 0.662352  | -5.203563 | -1.865902 |
| H | 1.495849  | -3.908308 | -1.559381 |
| O | 3.087501  | -3.272597 | -1.574280 |
| H | 3.433866  | -3.137147 | -0.661871 |
| H | 3.217767  | -2.419833 | -2.052760 |

---

**Table S84.** MP2/6-31+G\*/PCM optimized Cartesian coordinates of the (H<sub>2</sub>O)<sub>30</sub> hollow clathrate in the heptadecahedron 5<sup>12</sup>6<sup>5</sup>-C<sub>2v</sub> A configuration.

|   |           |           |           |
|---|-----------|-----------|-----------|
| O | -4.974235 | 2.131637  | 0.526761  |
| O | -2.852139 | 3.773267  | 1.270082  |
| O | -4.968208 | -0.076381 | 2.190844  |
| O | 1.283233  | 2.467742  | 3.283654  |
| O | -1.415266 | 2.550339  | 3.405652  |
| O | -2.658421 | 0.105200  | 3.849108  |
| O | 2.654180  | 3.888889  | 1.250959  |
| O | -4.869052 | -2.297891 | 0.663646  |
| O | 1.479093  | -2.398144 | 3.446527  |
| O | -1.231756 | -2.282980 | 3.320777  |
| O | -2.665418 | -3.800954 | 1.401858  |
| O | 2.727716  | 0.136219  | 3.729282  |
| O | -4.421364 | -1.520392 | -2.024754 |
| O | -4.508526 | 1.293059  | -2.158605 |
| O | -2.312768 | 2.647829  | -3.009234 |
| O | -2.293699 | -2.856595 | -3.045905 |
| O | -0.052253 | -1.387353 | -3.932737 |
| O | -0.073961 | 1.324670  | -4.128992 |
| O | 1.432761  | -4.471454 | -0.949073 |
| O | -1.273433 | -4.484201 | -0.970759 |
| O | 2.877835  | -3.674891 | 1.351909  |
| O | 1.261890  | 4.561485  | -1.125332 |
| O | -1.442357 | 4.514002  | -1.069525 |
| O | 2.115183  | 2.809255  | -3.097128 |
| O | 2.238898  | -2.787993 | -3.006390 |
| O | 4.471480  | -1.301872 | -2.081319 |
| O | 4.414864  | 1.413328  | -2.212215 |
| O | 4.992303  | -2.181400 | 0.560883  |
| O | 5.072695  | 0.110756  | 2.114734  |
| O | 4.756829  | 2.368715  | 0.432195  |
| H | -1.647863 | -3.916017 | -1.685069 |
| H | -1.749510 | -4.232462 | -0.145050 |
| H | -2.977903 | -4.613587 | 1.840923  |
| H | -3.488922 | -3.303155 | 1.155136  |
| H | -3.069539 | -2.336337 | -2.690244 |
| H | -2.654415 | -3.391329 | -3.776671 |
| H | -1.710780 | -1.433969 | 3.463126  |
| H | -1.733058 | -2.779396 | 2.633020  |
| H | -0.842147 | -1.876620 | -3.602827 |
| H | 0.735301  | -1.861996 | -3.579276 |
| H | 0.485898  | -2.343371 | 3.372630  |
| H | 1.644176  | -2.910700 | 4.258984  |
| H | 1.963238  | -3.419893 | -2.291628 |
| H | 2.538303  | -3.351434 | -3.743757 |
| H | 2.286863  | -3.915501 | 0.600916  |
| H | 2.315319  | -3.236870 | 2.033467  |
| H | 0.432389  | -4.474676 | -0.923161 |
| H | 1.688068  | -5.397839 | -1.114508 |
| H | 4.224865  | -2.748836 | 0.862593  |
| H | 5.781084  | -2.751345 | 0.619275  |
| H | 3.682961  | -1.803143 | -2.395137 |
| H | 4.651861  | -1.628188 | -1.168740 |
| H | 2.280092  | -0.733548 | 3.610300  |
| H | 3.542897  | 0.096375  | 3.178528  |

|   |           |           |           |
|---|-----------|-----------|-----------|
| H | 5.895801  | 0.122077  | 2.636808  |
| H | 5.105491  | -0.726846 | 1.583100  |
| H | 4.411922  | 0.414964  | -2.187573 |
| H | 5.170663  | 1.654482  | -2.778440 |
| H | 4.888632  | 1.573620  | 0.999558  |
| H | 4.649234  | 2.028542  | -0.487555 |
| H | 2.868858  | 2.237233  | -2.823301 |
| H | 1.406190  | 2.210701  | -3.427354 |
| H | 3.033777  | 4.700091  | 1.635766  |
| H | 3.438333  | 3.342020  | 0.960168  |
| H | 1.748852  | 2.948544  | 2.560057  |
| H | 1.774791  | 1.617590  | 3.413222  |
| H | 1.726279  | 4.320115  | -0.290023 |
| H | 1.584442  | 3.921542  | -1.810163 |
| H | -0.095129 | 1.477093  | -5.091456 |
| H | -0.066375 | 0.332809  | -4.024427 |
| H | -1.580614 | 3.130745  | 4.171494  |
| H | -0.418801 | 2.499164  | 3.331609  |
| H | -1.971408 | 3.289050  | -2.341868 |
| H | -1.528338 | 2.164919  | -3.360890 |
| H | -2.276367 | 4.012763  | 0.507272  |
| H | -2.271476 | 3.351601  | 1.943855  |
| H | -1.723582 | 5.413059  | -1.319798 |
| H | -0.442043 | 4.544434  | -1.054699 |
| H | -4.812661 | 1.857406  | -0.405141 |
| H | -4.215359 | 2.720982  | 0.766719  |
| H | -3.689926 | 1.759822  | -2.489207 |
| H | -5.226720 | 1.581071  | -2.751103 |
| H | -2.184917 | 0.965861  | 3.703337  |
| H | -2.907701 | 0.107476  | 4.791593  |
| H | -4.964202 | 0.725059  | 1.604346  |
| H | -4.171523 | 0.007133  | 2.764027  |
| H | -4.591540 | -1.756526 | -1.082994 |
| H | -4.422203 | -0.534850 | -2.067114 |
| H | -5.723168 | -2.756847 | 0.764753  |
| H | -4.927216 | -1.484191 | 1.247365  |

**Table S85.** MP2/6-31+G\*/PCM optimized Cartesian coordinates of the  $\text{CH}_4@(\text{H}_2\text{O})_{16}$  4<sup>2</sup>5<sup>8</sup> methane-clathrate.

|   |           |           |           |
|---|-----------|-----------|-----------|
| O | 0.736488  | 3.324263  | 0.693378  |
| H | 0.294334  | 3.195668  | -0.183069 |
| H | 1.623484  | 2.907036  | 0.591278  |
| O | 0.517595  | -0.663264 | 3.194268  |
| H | 0.127026  | 0.233933  | 3.042333  |
| H | 0.594232  | -0.749124 | 4.162553  |
| O | -3.133352 | -1.012100 | -1.627524 |
| H | -2.274439 | -1.293452 | -2.021416 |
| H | -3.103632 | -0.028386 | -1.591675 |
| O | -0.522820 | 2.922099  | -1.810069 |
| H | -0.102431 | 2.176788  | -2.293992 |
| H | -1.427396 | 2.595743  | -1.596136 |
| O | -3.164060 | -1.632816 | 1.039698  |
| H | -3.184680 | -1.502985 | 0.050157  |
| H | -3.999899 | -2.079647 | 1.267694  |
| O | 3.153986  | 0.389936  | -1.866900 |

|   |           |           |           |
|---|-----------|-----------|-----------|
| H | 3.144569  | -0.518898 | -1.487265 |
| H | 2.301069  | 0.481588  | -2.351834 |
| O | -3.032791 | 1.793550  | -1.101899 |
| H | -3.823920 | 2.310804  | -1.340294 |
| H | -3.076327 | 1.665451  | -0.112774 |
| O | 3.053643  | -0.552280 | 1.900193  |
| H | 2.186820  | -0.599751 | 2.366228  |
| H | 3.101532  | 0.355250  | 1.520086  |
| O | 0.533471  | -3.338540 | -0.656444 |
| H | 1.438790  | -2.965795 | -0.544499 |
| H | 0.087184  | -3.190058 | 0.214234  |
| O | -3.064652 | 1.169011  | 1.560376  |
| H | -2.199937 | 1.404858  | 1.970554  |
| H | -3.089434 | 0.185123  | 1.524629  |
| O | 3.166536  | 1.885688  | 0.428627  |
| H | 3.188199  | 1.426225  | -0.457110 |
| H | 3.992799  | 2.400251  | 0.481726  |
| O | 3.050825  | -2.050292 | -0.388641 |
| H | 3.833418  | -2.631032 | -0.413754 |
| H | 3.079135  | -1.591315 | 0.497396  |
| O | -0.559344 | 1.906356  | 2.660611  |
| H | -0.643135 | 2.488964  | 3.438025  |
| H | -0.088825 | 2.450136  | 1.966107  |
| O | -0.632304 | -1.855913 | -2.656048 |
| H | -0.715618 | -2.446588 | -3.427447 |
| H | -0.212884 | -2.411372 | -1.938091 |
| O | 0.638980  | 0.626150  | -3.181575 |
| H | 0.185053  | -0.241685 | -3.034920 |
| H | 0.709173  | 0.719927  | -4.149576 |
| O | -0.755372 | -2.903561 | 1.834018  |
| H | -0.310911 | -2.186282 | 2.338231  |
| H | -1.636458 | -2.530457 | 1.599053  |
| C | 0.010794  | -0.009652 | -0.026220 |
| H | 0.719967  | -0.643192 | -0.554640 |
| H | 0.552330  | 0.770755  | 0.502908  |
| H | -0.551953 | -0.614629 | 0.680431  |
| H | -0.676637 | 0.447772  | -0.734354 |

**Table S86.** MP2/6-31+G\*/PCM optimized Cartesian coordinates of the  $\text{CH}_4@(\text{H}_2\text{O})_{16}$  4<sup>3</sup>5<sup>6</sup>6<sup>1</sup> methane-clathrate.

|   |           |           |           |
|---|-----------|-----------|-----------|
| O | 2.383679  | 1.110353  | 2.248134  |
| H | 2.996113  | 1.400602  | 2.949096  |
| H | 2.210092  | 1.915439  | 1.695505  |
| O | -3.653186 | -0.085784 | 0.514441  |
| H | -3.304636 | -1.020231 | 0.602825  |
| H | -4.612434 | -0.137447 | 0.681293  |
| O | 1.717729  | 2.242902  | -2.191729 |
| H | 1.879009  | 2.570277  | -1.277889 |
| H | 2.046132  | 1.313755  | -2.199136 |
| O | 1.187843  | -2.670390 | -2.080218 |
| H | 0.220184  | -2.490466 | -2.129803 |
| H | 1.354145  | -2.957399 | -1.152988 |
| O | 2.742395  | -0.406837 | -2.149210 |
| H | 2.146510  | -1.203931 | -2.221049 |

|   |           |           |           |
|---|-----------|-----------|-----------|
| H | 3.449096  | -0.545718 | -2.806242 |
| O | -2.179167 | 1.585595  | 2.171839  |
| H | -2.783605 | 1.004381  | 1.641417  |
| H | -2.744256 | 2.006939  | 2.845498  |
| O | -1.023694 | 2.465031  | -2.270608 |
| H | -0.036422 | 2.342088  | -2.339575 |
| H | -1.257195 | 3.116791  | -2.956974 |
| O | 3.468517  | -0.908926 | 0.562738  |
| H | 3.106785  | -0.198143 | 1.141660  |
| H | 3.297277  | -0.615434 | -0.361849 |
| O | -2.508236 | -2.546945 | 0.541822  |
| H | -1.737812 | -2.565617 | 1.166900  |
| H | -2.124178 | -2.568447 | -0.364295 |
| O | -0.957345 | 3.450097  | 0.402463  |
| H | -1.396741 | 2.808763  | 1.008385  |
| H | -1.125313 | 3.118064  | -0.509835 |
| O | -0.378180 | -2.598192 | 2.333666  |
| H | -0.242427 | -1.679486 | 2.675509  |
| H | 0.429167  | -2.806802 | 1.810810  |
| O | -2.800653 | 0.247652  | -2.204121 |
| H | -3.166838 | 0.263932  | -1.290689 |
| H | -2.163336 | 0.997989  | -2.246269 |
| O | 1.754250  | 3.198845  | 0.518908  |
| H | 2.185756  | 4.056491  | 0.689218  |
| H | 0.770571  | 3.371261  | 0.557378  |
| O | -1.614505 | -2.235106 | -2.158577 |
| H | -2.002399 | -1.323444 | -2.270687 |
| H | -2.066933 | -2.796441 | -2.814709 |
| O | -0.058555 | 0.022918  | 3.294854  |
| H | 0.772904  | 0.411692  | 2.940134  |
| H | -0.783056 | 0.572817  | 2.918877  |
| O | 1.876227  | -3.130239 | 0.657312  |
| H | 2.384707  | -3.931027 | 0.881552  |
| H | 2.520807  | -2.370518 | 0.711525  |
| C | 0.012299  | 0.001174  | -0.150843 |
| H | -1.012929 | 0.080077  | 0.207484  |
| H | 0.590761  | 0.849802  | 0.211076  |
| H | 0.017006  | -0.001840 | -1.240053 |
| H | 0.452743  | -0.923604 | 0.217239  |

**Table S87.** MP2/6-31+G\*/PCM optimized Cartesian coordinates of the CH<sub>4</sub>@(H<sub>2</sub>O)<sub>17</sub> 4<sup>4</sup>5<sup>6</sup>6<sup>1</sup> methane-clathrate.

|   |           |           |           |
|---|-----------|-----------|-----------|
| O | 2.360992  | 1.952660  | 1.253761  |
| H | 2.090674  | 1.212154  | 1.848944  |
| H | 3.113048  | 1.566876  | 0.748762  |
| O | -1.059317 | -3.212663 | 1.258892  |
| H | -1.795798 | -2.935985 | 0.666867  |
| H | -0.261374 | -3.243512 | 0.681565  |
| O | -3.108292 | -2.195798 | -0.425854 |
| H | -3.427007 | -1.345968 | -0.004706 |
| H | -3.896714 | -2.762122 | -0.517284 |
| O | 1.261067  | -3.237397 | -0.402829 |
| H | 1.598402  | -4.139719 | -0.553191 |
| H | 1.985492  | -2.761115 | 0.092379  |
| O | -2.990530 | 1.455663  | -1.874498 |



|   |           |           |           |
|---|-----------|-----------|-----------|
| H | -2.540730 | 0.682214  | -2.281853 |
| H | -2.286612 | 2.110161  | -1.658349 |
| O | 2.342737  | 0.401347  | -2.738455 |
| H | 1.755648  | -0.407761 | -2.782419 |
| H | 2.748494  | 0.482138  | -3.621266 |
| O | -1.998489 | -1.105540 | -2.764645 |
| H | -2.422320 | -1.595974 | -2.015304 |
| H | -2.455410 | -1.415802 | -3.568489 |
| O | -2.129449 | 1.186848  | 2.620904  |
| H | -2.619701 | 1.533164  | 3.388960  |
| H | -1.505746 | 1.912755  | 2.351217  |
| O | 3.180037  | -1.864330 | 0.978186  |
| H | 3.563702  | -1.143553 | 0.427701  |
| H | 2.741618  | -1.391348 | 1.724326  |
| O | -0.412260 | 3.161533  | 1.699211  |
| H | -0.722801 | 3.337755  | 0.779760  |
| H | 0.524072  | 2.893956  | 1.601934  |
| O | -3.813304 | 0.261053  | 0.504215  |
| H | -3.235259 | 0.590376  | 1.230198  |
| H | -3.556135 | 0.782358  | -0.297862 |
| O | 1.843662  | -0.291280 | 2.898015  |
| H | 2.223877  | -0.227495 | 3.793329  |
| H | 0.909358  | -0.630484 | 3.022200  |
| O | 1.503287  | 2.757340  | -1.405130 |
| H | 1.706770  | 1.972020  | -1.963277 |
| H | 1.724378  | 2.472983  | -0.491075 |
| O | 0.768396  | -1.826520 | -2.818334 |
| H | -0.185324 | -1.579492 | -2.801215 |
| H | 0.921924  | -2.337253 | -1.988510 |
| O | -0.689739 | -1.202252 | 3.166912  |
| H | -0.856169 | -1.889687 | 2.473074  |
| H | -1.255169 | -0.428385 | 2.942545  |
| O | 4.020968  | 0.405855  | -0.505147 |
| H | 4.959935  | 0.525029  | -0.738144 |
| H | 3.528831  | 0.373371  | -1.364301 |
| O | -1.106779 | 3.406151  | -1.049995 |
| H | -1.305672 | 4.294157  | -1.400060 |
| H | -0.172767 | 3.202626  | -1.333551 |
| C | -0.138101 | -0.013001 | -0.155282 |
| H | -0.818337 | -0.862813 | -0.138721 |
| H | 0.881871  | -0.358200 | 0.016831  |
| H | -0.418961 | 0.691765  | 0.625486  |
| H | -0.195385 | 0.477463  | -1.126487 |

**Table S88.** MP2/6-31+G\*/PCM optimized Cartesian coordinates of the  $\text{CH}_4@(\text{H}_2\text{O})_{18}$   $4^25^86^1$  methane-clathrate.

|   |           |           |           |
|---|-----------|-----------|-----------|
| O | 2.080889  | -2.584371 | 1.609757  |
| H | 1.251945  | -2.964298 | 1.212000  |
| H | 2.503393  | -3.321595 | 2.088503  |
| O | -2.451363 | -1.057541 | -2.695538 |
| H | -3.026865 | -1.195234 | -1.908840 |
| H | -2.245814 | -0.095150 | -2.680747 |
| O | 2.398491  | 1.543531  | -2.486493 |
| H | 2.992979  | 1.528841  | -1.701961 |

|   |           |           |           |
|---|-----------|-----------|-----------|
| H | 2.200593  | 0.594285  | -2.655960 |
| O | -2.055992 | 2.263445  | 2.080953  |
| H | -1.253701 | 2.745285  | 1.750486  |
| H | -2.490547 | 2.874551  | 2.703987  |
| O | -2.345726 | -2.367717 | 1.713670  |
| H | -2.030879 | -1.608738 | 2.268320  |
| H | -2.956475 | -1.972075 | 1.048490  |
| O | 2.085560  | -1.286716 | -2.773297 |
| H | 2.463521  | -1.664042 | -3.588710 |
| H | 1.226967  | -1.778690 | -2.624139 |
| O | -2.119051 | 1.777491  | -2.463299 |
| H | -2.527050 | 2.295295  | -3.181364 |
| H | -1.263442 | 2.248881  | -2.247764 |
| O | 2.324733  | 2.016310  | 2.011798  |
| H | 2.923433  | 1.734200  | 1.280003  |
| H | 2.020765  | 1.179712  | 2.434485  |
| O | -0.241175 | -3.490051 | 0.425970  |
| H | -0.363423 | -4.455733 | 0.486971  |
| H | -1.027089 | -3.090722 | 0.903632  |
| O | -0.210309 | -2.665641 | -2.314642 |
| H | -0.237321 | -2.940082 | -1.369272 |
| H | -0.999055 | -2.080249 | -2.443660 |
| O | 0.177883  | 3.088810  | -1.822388 |
| H | 0.213577  | 3.212200  | -0.846306 |
| H | 0.963677  | 2.529987  | -2.049542 |
| O | -3.962447 | -1.177732 | -0.273749 |
| H | -4.901904 | -1.436235 | -0.295033 |
| H | -3.950376 | -0.187837 | -0.140055 |
| O | 3.954412  | 1.182554  | -0.126209 |
| H | 3.953429  | 0.185221  | -0.176435 |
| H | 4.890522  | 1.451422  | -0.093524 |
| O | 0.232454  | 3.437069  | 1.027002  |
| H | 0.361143  | 4.372786  | 1.269443  |
| H | 1.021980  | 2.949104  | 1.401963  |
| O | 3.702306  | -1.506040 | -0.463341 |
| H | 3.143234  | -1.533074 | -1.275766 |
| H | 3.157631  | -1.914840 | 0.248087  |
| O | -3.678662 | 1.520411  | -0.117382 |
| H | -3.138619 | 1.706651  | -0.921298 |
| H | -3.120087 | 1.794757  | 0.646905  |
| O | 1.433839  | -0.400214 | 3.221930  |
| H | 1.692020  | -1.196915 | 2.691687  |
| H | 1.819746  | -0.540469 | 4.106321  |
| O | -1.402834 | -0.253538 | 3.264917  |
| H | -0.419037 | -0.293281 | 3.266927  |
| H | -1.624080 | 0.616502  | 2.861372  |
| C | -0.061204 | -0.007231 | -0.102469 |
| H | -0.985931 | -0.556641 | 0.074361  |
| H | 0.053613  | 0.176664  | -1.170323 |
| H | 0.786796  | -0.591926 | 0.257623  |
| H | -0.096102 | 0.944397  | 0.426663  |

**Table S89.** MP2/6-31+G\*/PCM optimized Cartesian coordinates of the CH<sub>4</sub>@(H<sub>2</sub>O)<sub>19</sub> 4<sup>2</sup>5<sup>10</sup> methane-clathrate.

|   |           |           |           |
|---|-----------|-----------|-----------|
| O | 2.119176  | -2.037399 | -2.297912 |
| H | 2.828058  | -1.445707 | -1.939070 |
| H | 1.819354  | -2.578511 | -1.529456 |
| O | 3.917382  | -0.125923 | -1.363571 |
| H | 3.434694  | 0.647607  | -1.730046 |
| H | 3.827495  | -0.058928 | -0.384703 |
| O | 2.134291  | 1.766257  | -2.549635 |
| H | 1.444133  | 1.141604  | -2.878456 |
| H | 2.417001  | 2.279656  | -3.328961 |
| O | 1.467952  | 3.452037  | -0.365474 |
| H | 1.720498  | 3.003134  | 0.475468  |
| H | 1.722694  | 2.839251  | -1.092560 |
| O | 1.303157  | -3.556568 | -0.062169 |
| H | 1.587386  | -3.114965 | 0.788291  |
| H | 1.693448  | -4.449310 | -0.038441 |
| O | 2.116915  | 2.220768  | 2.092202  |
| H | 1.280744  | 1.972771  | 2.583958  |
| H | 2.591198  | 2.839175  | 2.678306  |
| O | -0.165621 | 1.534982  | 3.389337  |
| H | -0.931365 | 1.837630  | 2.847413  |
| H | -0.243073 | 0.554014  | 3.440349  |
| O | -0.300026 | -1.306089 | 3.491467  |
| H | -1.099305 | -1.611124 | 2.985855  |
| H | -0.425129 | -1.634309 | 4.401132  |
| O | 3.577652  | -0.042973 | 1.455708  |
| H | 3.087250  | 0.780316  | 1.715950  |
| H | 4.425875  | -0.001383 | 1.934915  |
| O | 2.048172  | -2.298192 | 2.233568  |
| H | 2.578038  | -1.501951 | 1.994650  |
| H | 1.252618  | -1.959038 | 2.705490  |
| O | 0.278287  | -0.308312 | -3.256880 |
| H | 0.930544  | -0.992954 | -2.914136 |
| H | 0.300945  | -0.397115 | -4.229257 |
| O | -1.749709 | 1.783592  | -2.676622 |
| H | -1.008815 | 1.148369  | -2.751378 |
| H | -1.514353 | 2.394730  | -1.940513 |
| O | -3.754646 | 0.035123  | -1.773565 |
| H | -3.151543 | 0.751146  | -2.088856 |
| H | -3.274458 | -0.783384 | -2.052677 |
| O | -3.724219 | 0.122215  | 0.999269  |
| H | -3.243651 | 0.944938  | 1.247732  |
| H | -3.740679 | 0.106086  | 0.006683  |
| O | -2.304958 | 2.463463  | 1.779020  |
| H | -1.953652 | 2.931848  | 0.977568  |
| H | -2.869972 | 3.113010  | 2.236656  |
| O | -2.076019 | -2.041882 | -2.617576 |
| H | -1.282742 | -1.508397 | -2.833429 |
| H | -1.835528 | -2.570720 | -1.814238 |
| O | -1.501566 | -3.496845 | -0.326213 |
| H | -1.837416 | -3.012860 | 0.463344  |
| H | -0.525074 | -3.548678 | -0.203358 |
| O | -2.460440 | -2.071711 | 1.937920  |
| H | -3.130958 | -2.589095 | 2.421159  |
| H | -2.940204 | -1.257561 | 1.601921  |
| O | -1.224925 | 3.566333  | -0.524848 |
| H | -0.227342 | 3.602707  | -0.445483 |
| H | -1.510399 | 4.473466  | -0.740293 |
| C | 0.019585  | 0.038417  | 0.091179  |

|   |           |           |           |
|---|-----------|-----------|-----------|
| H | -0.397698 | 1.039958  | 0.200846  |
| H | 0.993526  | 0.099721  | -0.396821 |
| H | -0.654241 | -0.572517 | -0.510135 |
| H | 0.137740  | -0.414132 | 1.075291  |

---

**Table S90.** MP2/6-31+G\*/PCM optimized Cartesian coordinates of the CH<sub>4</sub>@(H<sub>2</sub>O)<sub>20</sub> 5<sup>12</sup> methane-clathrate.

|   |           |           |           |
|---|-----------|-----------|-----------|
| C | -0.053484 | -0.015243 | 0.003432  |
| H | -0.534922 | 0.921052  | -0.283385 |
| H | -0.089090 | -0.714293 | -0.833656 |
| H | -0.575014 | -0.444034 | 0.860434  |
| H | 0.986565  | 0.178736  | 0.272396  |
| O | 1.641416  | -3.204630 | 1.357573  |
| H | 0.841292  | -3.419238 | 0.825066  |
| H | 1.322107  | -2.641497 | 2.109315  |
| O | -2.326027 | 1.501750  | 2.721054  |
| H | -2.704776 | 1.634526  | 1.821189  |
| H | -1.445633 | 1.961168  | 2.714742  |
| O | 3.757877  | 0.712505  | 0.994242  |
| H | 3.673494  | -0.178345 | 0.580405  |
| H | 3.457513  | 1.357346  | 0.310317  |
| O | -0.732741 | 1.649365  | -3.470550 |
| H | -1.084825 | 2.220715  | -2.750220 |
| H | -1.211442 | 0.791622  | -3.391042 |
| O | -0.647188 | -3.821643 | -0.209803 |
| H | -1.438724 | -3.395635 | 0.209172  |
| H | -0.832361 | -4.778879 | -0.200504 |
| O | 1.982316  | 1.218689  | -3.100768 |
| H | 1.009048  | 1.354898  | -3.232128 |
| H | 2.104368  | 0.250357  | -2.968358 |
| O | -1.980375 | -1.130020 | 3.181206  |
| H | -2.129703 | -0.148104 | 3.033699  |
| H | -2.468616 | -1.351837 | 3.995653  |
| O | -0.165477 | -2.781959 | -2.791589 |
| H | -0.324186 | -3.172886 | -1.900721 |
| H | 0.737051  | -2.387258 | -2.752864 |
| O | 2.166445  | 0.844510  | 3.192809  |
| H | 2.774795  | 0.803716  | 2.400623  |
| H | 2.737295  | 1.061308  | 3.952400  |
| O | 0.598455  | 3.890407  | 0.237338  |
| H | -0.176158 | 3.708422  | -0.342201 |
| H | 1.363573  | 3.439805  | -0.190362 |
| O | 2.381388  | -1.556462 | -2.676388 |
| H | 2.793908  | -1.687688 | -1.782428 |
| H | 3.013239  | -1.938743 | -3.312935 |
| O | -3.446954 | 1.836609  | 0.136587  |
| H | -3.548065 | 0.932459  | -0.281999 |
| H | -4.348236 | 2.204928  | 0.188755  |
| O | 0.807829  | -1.615240 | 3.468559  |
| H | -0.154760 | -1.421625 | 3.393818  |
| H | 1.263043  | -0.744002 | 3.392749  |
| O | -3.668560 | -0.622515 | -0.968036 |
| H | -3.364649 | -1.300389 | -0.321304 |
| H | -3.091788 | -0.726976 | -1.761615 |

|   |           |           |           |
|---|-----------|-----------|-----------|
| O | 0.129285  | 2.772215  | 2.747399  |
| H | 0.314363  | 3.168315  | 1.858877  |
| H | 0.849266  | 2.117787  | 2.899692  |
| O | 3.437949  | -1.857305 | -0.134322 |
| H | 4.263480  | -2.375880 | -0.116667 |
| H | 2.783177  | -2.371231 | 0.425899  |
| O | -1.672733 | 3.327128  | -1.375056 |
| H | -2.117915 | 4.126126  | -1.712519 |
| H | -2.357702 | 2.844249  | -0.842785 |
| O | -2.816714 | -2.525466 | 0.951683  |
| H | -3.543393 | -3.123221 | 1.207895  |
| H | -2.552707 | -2.052233 | 1.785564  |
| O | 2.825750  | 2.567717  | -0.911056 |
| H | 3.513667  | 3.191751  | -1.206717 |
| H | 2.530769  | 2.081299  | -1.735257 |
| O | -2.027574 | -0.855744 | -3.248201 |
| H | -2.524254 | -1.108897 | -4.047776 |
| H | -1.347136 | -1.575511 | -3.113275 |

---

**Table S91.** MP2/6-31+G\*/PCM optimized Cartesian coordinates of the CH<sub>4</sub>@(H<sub>2</sub>O)<sub>22</sub> 4<sup>15</sup>1<sup>0</sup>6<sup>2</sup> methane-clathrate.

|   |           |           |           |
|---|-----------|-----------|-----------|
| O | 2.003441  | -3.698649 | 0.397880  |
| H | 2.266520  | -3.092292 | 1.129453  |
| H | 2.312100  | -3.266649 | -0.431233 |
| O | -1.691359 | -3.039037 | -2.013658 |
| H | -1.341900 | -3.389134 | -1.140481 |
| H | -1.915273 | -3.830435 | -2.537729 |
| O | -1.771620 | 2.965808  | 1.938885  |
| H | -1.364336 | 3.322485  | 1.115503  |
| H | -1.059517 | 2.484213  | 2.421906  |
| O | 2.650020  | 2.472785  | 2.141717  |
| H | 2.388951  | 2.937790  | 1.313810  |
| H | 1.807828  | 2.232224  | 2.593348  |
| O | -4.005427 | 1.593408  | 1.268913  |
| H | -3.186499 | 2.088648  | 1.557593  |
| H | -4.758416 | 2.063569  | 1.670679  |
| O | 2.687172  | 1.939612  | -2.389439 |
| H | 1.850950  | 1.618553  | -2.803375 |
| H | 2.419623  | 2.572156  | -1.682263 |
| O | 0.264066  | -1.008486 | 3.668337  |
| H | 1.088250  | -1.366824 | 3.261478  |
| H | -0.481374 | -1.490435 | 3.239628  |
| O | 0.423235  | -1.749626 | -3.380320 |
| H | -0.314786 | -2.174778 | -2.883623 |
| H | 1.249006  | -2.019108 | -2.914874 |
| O | -1.708608 | 2.559771  | -2.530732 |
| H | -1.040638 | 1.932953  | -2.893917 |
| H | -2.473282 | 2.013760  | -2.216327 |
| O | -1.842134 | -2.486721 | 2.504157  |
| H | -2.208084 | -3.088176 | 3.178518  |
| H | -2.628374 | -1.990442 | 2.138045  |
| O | 2.806368  | -2.449679 | -2.025455 |
| H | 3.320318  | -1.626778 | -1.812822 |
| H | 3.404686  | -3.000503 | -2.563155 |

|   |           |           |           |
|---|-----------|-----------|-----------|
| O | 0.347230  | 0.955192  | -3.617750 |
| H | 0.384357  | 1.108578  | -4.579823 |
| H | 0.337043  | -0.038919 | -3.511765 |
| O | -0.750223 | -3.954010 | 0.342204  |
| H | -1.110568 | -3.444369 | 1.105286  |
| H | 0.235301  | -3.848247 | 0.383090  |
| O | -0.749178 | 4.017336  | -0.473681 |
| H | -1.056988 | 4.931607  | -0.614659 |
| H | -1.104975 | 3.488483  | -1.248229 |
| O | 1.986870  | 3.725363  | -0.314822 |
| H | 1.010311  | 3.895393  | -0.378721 |
| H | 2.411850  | 4.595475  | -0.427805 |
| O | -3.981590 | -1.619185 | -1.388415 |
| H | -3.178349 | -2.138376 | -1.656368 |
| H | -4.740794 | -2.079414 | -1.790541 |
| O | 2.656947  | -1.958750 | 2.524646  |
| H | 3.176034  | -1.182889 | 2.161573  |
| H | 3.238705  | -2.377887 | 3.184833  |
| O | -3.924852 | 1.219068  | -1.548973 |
| H | -3.928195 | 0.236582  | -1.601260 |
| H | -3.996496 | 1.416909  | -0.586863 |
| O | -3.985584 | -1.219866 | 1.422830  |
| H | -3.981117 | -0.235060 | 1.468239  |
| H | -4.024932 | -1.426859 | 0.460614  |
| O | 0.251998  | 1.694782  | 3.430887  |
| H | 0.211486  | 2.022399  | 4.348144  |
| H | 0.223761  | 0.697748  | 3.505220  |
| O | 4.010619  | 0.144387  | 1.498495  |
| H | 3.529311  | 0.986454  | 1.705041  |
| H | 4.038055  | 0.081708  | 0.515664  |
| O | 4.093761  | -0.107349 | -1.328430 |
| H | 3.593162  | 0.658776  | -1.735929 |
| H | 5.007125  | -0.031934 | -1.661193 |
| C | 0.221882  | -0.021442 | 0.019664  |
| H | -0.486481 | -0.611093 | 0.605312  |
| H | 0.905885  | -0.691634 | -0.504301 |
| H | 0.789830  | 0.629455  | 0.686717  |
| H | -0.319590 | 0.585708  | -0.708622 |

**Table S92.** MP2/6-31+G\*/PCM optimized Cartesian coordinates of the  $C_2H_6@(H_2O)_{22}$   $4^15^{10}6^2$  ethane-clathrate.

|   |           |           |           |
|---|-----------|-----------|-----------|
| O | 1.457692  | -3.891674 | 0.348231  |
| H | 1.795975  | -3.353087 | 1.101347  |
| H | 1.850819  | -3.491499 | -0.460777 |
| O | -2.032566 | -2.820882 | -2.092358 |
| H | -1.774917 | -3.264613 | -1.230793 |
| H | -2.346717 | -3.540777 | -2.670585 |
| O | -1.393192 | 3.148143  | 1.985446  |
| H | -0.921629 | 3.466270  | 1.180354  |
| H | -0.763548 | 2.554382  | 2.458635  |
| O | 2.930955  | 2.073331  | 2.231986  |
| H | 2.767352  | 2.576063  | 1.401417  |
| H | 2.042871  | 1.909355  | 2.625858  |
| O | -3.755940 | 2.033545  | 1.268843  |

|   |           |           |           |
|---|-----------|-----------|-----------|
| H | -2.890831 | 2.435302  | 1.569055  |
| H | -4.455890 | 2.582991  | 1.666443  |
| O | 3.046370  | 1.666955  | -2.340694 |
| H | 2.169548  | 1.446549  | -2.736010 |
| H | 2.860794  | 2.311844  | -1.618799 |
| O | 0.017292  | -1.136231 | 3.545621  |
| H | 0.810853  | -1.589867 | 3.175609  |
| H | -0.765239 | -1.528978 | 3.092295  |
| O | 0.258461  | -1.703171 | -3.323368 |
| H | -0.533017 | -2.061938 | -2.857599 |
| H | 1.040459  | -2.090900 | -2.866129 |
| O | -1.284926 | 2.825475  | -2.435291 |
| H | -0.695614 | 2.117157  | -2.785341 |
| H | -2.126744 | 2.385567  | -2.152841 |
| O | -2.251053 | -2.359614 | 2.379107  |
| H | -2.705776 | -2.875323 | 3.070309  |
| H | -2.945991 | -1.744513 | 2.008552  |
| O | 2.538627  | -2.724652 | -2.005721 |
| H | 3.154194  | -1.980317 | -1.774525 |
| H | 3.064166  | -3.341849 | -2.547301 |
| O | 0.564015  | 0.987820  | -3.514105 |
| H | 0.603264  | 1.150027  | -4.474834 |
| H | 0.410402  | 0.004354  | -3.422507 |
| O | -1.306746 | -3.969764 | 0.247502  |
| H | -1.639659 | -3.439862 | 1.009270  |
| H | -0.317375 | -3.934720 | 0.307911  |
| O | -0.146315 | 4.108029  | -0.358829 |
| H | -0.335474 | 5.057259  | -0.477323 |
| H | -0.571958 | 3.647264  | -1.142224 |
| O | 2.537662  | 3.472734  | -0.216074 |
| H | 1.593878  | 3.775282  | -0.280155 |
| H | 3.077103  | 4.282793  | -0.275823 |
| O | -4.076778 | -1.044322 | -1.516306 |
| H | -3.351093 | -1.677975 | -1.757858 |
| H | -4.879085 | -1.387702 | -1.950916 |
| O | 2.356280  | -2.322556 | 2.516415  |
| H | 2.984308  | -1.617648 | 2.182252  |
| H | 2.858357  | -2.828105 | 3.181511  |
| O | -3.701726 | 1.776808  | -1.561534 |
| H | -3.804845 | 0.802998  | -1.654478 |
| H | -3.747745 | 1.936655  | -0.590659 |
| O | -4.174448 | -0.761935 | 1.304665  |
| H | -4.011142 | 0.205137  | 1.397582  |
| H | -4.185436 | -0.919767 | 0.332348  |
| O | 0.408239  | 1.545717  | 3.427609  |
| H | 0.407374  | 1.836944  | 4.357963  |
| H | 0.225138  | 0.563478  | 3.458189  |
| O | 4.011792  | -0.397343 | 1.568795  |
| H | 3.637544  | 0.494338  | 1.787905  |
| H | 4.041530  | -0.438441 | 0.584930  |
| O | 4.116921  | -0.576468 | -1.266736 |
| H | 3.743191  | 0.259175  | -1.673712 |
| H | 5.040952  | -0.627076 | -1.574120 |
| C | -0.817631 | -0.150889 | -0.056581 |
| C | 0.664723  | 0.205947  | -0.001504 |
| H | -1.239164 | 0.058673  | -1.043958 |
| H | -1.388347 | 0.423899  | 0.679049  |
| H | -0.973924 | -1.211901 | 0.153675  |

|   |          |           |           |
|---|----------|-----------|-----------|
| H | 1.086464 | -0.018025 | 0.981765  |
| H | 0.822659 | 1.270733  | -0.197276 |
| H | 1.234503 | -0.359522 | -0.744798 |

---

**Table S93.** MP2/6-31+G\*/PCM optimized Cartesian coordinates of the  $C_2H_6@(H_2O)_{24} 5^{12}6^2$  ethane-clathrate.

|   |           |           |           |
|---|-----------|-----------|-----------|
| C | -0.778784 | -0.041462 | -0.034440 |
| C | 0.742096  | -0.182615 | -0.017680 |
| H | -1.079547 | 1.010602  | 0.007880  |
| H | -1.230100 | -0.552808 | 0.820581  |
| H | -1.205385 | -0.472845 | -0.943972 |
| H | 1.040717  | -1.234979 | -0.056046 |
| H | 1.168775  | 0.250929  | 0.891263  |
| H | 1.196482  | 0.323487  | -0.874335 |
| O | -1.012156 | -2.544403 | 3.037551  |
| H | -1.215842 | -3.093204 | 3.817241  |
| H | -1.666245 | -1.788743 | 3.071196  |
| O | -4.425337 | -0.772614 | 0.740865  |
| H | -5.368864 | -0.909468 | 0.944864  |
| H | -4.388204 | 0.064425  | 0.206767  |
| O | -2.849323 | -0.544342 | 3.084696  |
| H | -3.412046 | -0.599667 | 2.277321  |
| H | -2.460170 | 0.362172  | 3.075184  |
| O | -3.368771 | -2.851762 | -0.863658 |
| H | -2.946647 | -2.445288 | -1.655620 |
| H | -3.750235 | -2.105959 | -0.345499 |
| O | -2.088204 | -1.759790 | -3.150561 |
| H | -1.128329 | -2.036353 | -3.114466 |
| H | -2.440781 | -2.155087 | -3.968991 |
| O | 2.873246  | -3.412018 | 0.789129  |
| H | 3.444217  | -4.157913 | 1.050322  |
| H | 2.152142  | -3.809137 | 0.233031  |
| O | 1.775142  | -2.099469 | 3.046964  |
| H | 2.123668  | -2.572561 | 2.255962  |
| H | 0.794972  | -2.200797 | 3.016197  |
| O | 0.794041  | -4.310220 | -0.776536 |
| H | -0.043513 | -4.250202 | -0.226344 |
| H | 0.859979  | -5.241663 | -1.057482 |
| O | -1.443806 | -4.081558 | 0.693862  |
| H | -1.308879 | -3.527666 | 1.498081  |
| H | -2.141091 | -3.623660 | 0.156903  |
| O | -2.620305 | 1.008413  | -3.087213 |
| H | -2.412553 | 0.044845  | -3.106325 |
| H | -3.158412 | 1.153880  | -2.274007 |
| O | 0.484612  | -2.602723 | -3.006633 |
| H | 1.224116  | -1.950236 | -2.997638 |
| H | 0.622646  | -3.184992 | -2.223442 |
| O | -1.825318 | 2.075654  | 3.066965  |
| H | -2.127646 | 2.541597  | 3.868219  |
| H | -0.832902 | 2.192658  | 3.056017  |
| O | 2.739635  | 0.431199  | 3.104871  |
| H | 3.274067  | 0.486195  | 3.918430  |
| H | 2.361105  | -0.494540 | 3.098082  |
| O | 4.227339  | -1.462957 | -0.760795 |



|   |           |           |           |
|---|-----------|-----------|-----------|
| H | 3.753288  | -2.163845 | -0.257259 |
| H | 3.670846  | -1.273803 | -1.551691 |
| O | 4.370768  | 0.811501  | 0.808658  |
| H | 3.802410  | 0.662732  | 1.600036  |
| H | 4.311405  | -0.019614 | 0.270428  |
| O | 3.452220  | 2.852796  | -0.688155 |
| H | 3.813191  | 2.098847  | -0.132422 |
| H | 4.223182  | 3.404157  | -0.916805 |
| O | 1.549874  | 4.146786  | 0.829878  |
| H | 2.274390  | 3.731613  | 0.291586  |
| H | 1.893889  | 5.015974  | 1.106466  |
| O | -0.478750 | 2.676777  | -3.035985 |
| H | -0.595321 | 3.227874  | -3.831792 |
| H | -1.238402 | 2.026720  | -3.056631 |
| O | -2.904448 | 3.327973  | 0.763335  |
| H | -2.519990 | 2.897679  | 1.562713  |
| H | -2.133637 | 3.682814  | 0.249368  |
| O | -4.171009 | 1.517527  | -0.774107 |
| H | -3.713787 | 2.205566  | -0.203916 |
| H | -5.025911 | 1.912682  | -1.026887 |
| O | -0.799879 | 4.303212  | -0.738682 |
| H | 0.038555  | 4.259945  | -0.223770 |
| H | -0.660161 | 3.734280  | -1.531346 |
| O | 2.209552  | 1.825496  | -3.010140 |
| H | 2.617074  | 2.210572  | -2.199364 |
| H | 1.258430  | 2.084707  | -2.991269 |
| O | 2.686334  | -0.845621 | -3.063287 |
| H | 3.198394  | -1.009984 | -3.876336 |
| H | 2.490123  | 0.134344  | -3.065963 |
| O | 0.850699  | 2.517762  | 3.033103  |
| H | 1.485736  | 1.763561  | 3.059332  |
| H | 1.121684  | 3.073660  | 2.265864  |

---

**Table S94.** MP2/6-31+G\*/PCM optimized Cartesian coordinates of the  $C_2H_6@(H_2O)_{26}$   $5^{12}6^3$  ethane-clathrate.

|   |          |           |           |
|---|----------|-----------|-----------|
| O | 4.034918 | 2.271601  | -1.333040 |
| H | 4.752039 | 2.880119  | -1.588470 |
| H | 3.441942 | 2.794327  | -0.720974 |
| O | 2.321999 | 2.410618  | 2.869496  |
| H | 2.700430 | 3.031380  | 3.519363  |
| H | 1.430781 | 2.165011  | 3.232533  |
| O | 2.408021 | 3.647403  | 0.339640  |
| H | 2.292542 | 3.208763  | 1.214433  |
| H | 1.506352 | 3.793982  | -0.029194 |
| O | 3.964396 | 0.103634  | 2.622977  |
| H | 3.394059 | -0.687487 | 2.765597  |
| H | 3.374845 | 0.884647  | 2.732219  |
| O | 2.382021 | -2.209977 | 2.976354  |
| H | 2.386226 | -2.749563 | 2.134095  |
| H | 2.761088 | -2.793321 | 3.659128  |
| O | 2.484685 | -1.507284 | -3.331980 |
| H | 2.911107 | -1.853548 | -4.137630 |
| H | 3.075465 | -1.786268 | -2.583794 |
| O | 2.477576 | 1.321634  | -3.482223 |
| H | 2.473693 | 0.339171  | -3.413865 |

|   |           |           |           |
|---|-----------|-----------|-----------|
| H | 3.054004  | 1.638483  | -2.748180 |
| O | 4.047986  | -2.246515 | -1.173541 |
| H | 4.399440  | -1.420410 | -0.724655 |
| H | 4.835354  | -2.762430 | -1.427469 |
| O | 4.949463  | -0.018847 | 0.037495  |
| H | 4.641125  | 0.792890  | -0.429508 |
| H | 4.595989  | 0.048773  | 0.961644  |
| O | -0.065146 | -1.221696 | 3.934242  |
| H | 0.777952  | -1.551054 | 3.542812  |
| H | -0.030353 | -0.237411 | 3.896404  |
| O | 2.470342  | -3.659029 | 0.690514  |
| H | 1.596562  | -3.837989 | 0.269528  |
| H | 3.006073  | -3.180702 | 0.015000  |
| O | -2.450591 | 3.674841  | 0.315115  |
| H | -2.940871 | 4.507309  | 0.448674  |
| H | -3.009587 | 3.135360  | -0.317754 |
| O | -2.327253 | 1.232124  | -3.510341 |
| H | -2.685599 | 1.517446  | -4.370812 |
| H | -1.436359 | 1.681765  | -3.433720 |
| O | 0.008139  | -2.847637 | -3.025270 |
| H | 0.860527  | -2.361396 | -3.108225 |
| H | 0.048140  | -3.322096 | -2.162583 |
| O | -2.417808 | -1.579811 | -3.372127 |
| H | -2.310201 | -0.600999 | -3.418408 |
| H | -1.511011 | -1.962033 | -3.253758 |
| O | -3.977998 | -2.307773 | -1.302667 |
| H | -3.409568 | -2.039861 | -2.085378 |
| H | -4.647700 | -2.919349 | -1.660522 |
| O | -5.016344 | -0.058668 | -0.086897 |
| H | -4.698703 | -0.884474 | -0.538601 |
| H | -5.989102 | -0.086725 | -0.142970 |
| O | -2.414441 | -2.189450 | 3.016594  |
| H | -2.760968 | -2.754692 | 3.731145  |
| H | -1.528521 | -1.859986 | 3.342659  |
| O | -2.438362 | 2.333092  | 2.810562  |
| H | -2.414759 | 2.779880  | 1.932855  |
| H | -3.015705 | 1.534926  | 2.694995  |
| O | -0.098775 | 1.599313  | 3.918625  |
| H | -0.948126 | 1.894960  | 3.474067  |
| H | -0.176159 | 1.900789  | 4.842877  |
| O | -4.034371 | 0.083194  | 2.566175  |
| H | -4.387885 | 0.001323  | 1.650725  |
| H | -3.492109 | -0.725958 | 2.716115  |
| O | -2.342190 | -3.609127 | 0.595261  |
| H | -2.925127 | -3.127966 | -0.037230 |
| H | -2.347236 | -3.088677 | 1.433014  |
| O | 0.020852  | -4.237185 | -0.561831 |
| H | -0.034631 | -5.198305 | -0.715202 |
| H | -0.831145 | -3.994942 | -0.097952 |
| O | -3.921072 | 2.188367  | -1.396922 |
| H | -3.374081 | 1.839036  | -2.140643 |
| H | -4.310017 | 1.397704  | -0.954841 |
| O | -0.041571 | 4.170869  | -0.947112 |
| H | -0.056177 | 5.111535  | -1.203423 |
| H | -0.900995 | 4.015983  | -0.473741 |
| O | 0.012037  | 2.554774  | -3.275302 |
| H | 0.880971  | 2.079309  | -3.318552 |
| H | 0.032063  | 3.099571  | -2.455402 |

|   |           |           |           |
|---|-----------|-----------|-----------|
| C | -0.721283 | 0.129098  | -0.001719 |
| C | 0.793692  | -0.070978 | 0.038380  |
| H | -1.158834 | -0.338508 | -0.890002 |
| H | -0.978301 | 1.193142  | -0.023754 |
| H | -1.200979 | -0.310921 | 0.878896  |
| H | 1.229081  | 0.393837  | 0.929074  |
| H | 1.274763  | 0.374051  | -0.838969 |
| H | 1.051654  | -1.134841 | 0.057963  |

---

**Table S95.** MP2/6-31+G\*/PCM optimized Cartesian coordinates of the  $C_3H_8@(H_2O)_{24}$   $5^{12}6^2$  propane-clathrate.

|   |           |           |           |
|---|-----------|-----------|-----------|
| C | -1.299130 | -0.210109 | -0.031428 |
| C | -0.019279 | 0.460198  | -0.512119 |
| C | 1.206412  | -0.203615 | 0.101158  |
| H | -2.186462 | 0.251957  | -0.465419 |
| H | -1.380566 | -0.140665 | 1.056820  |
| H | -1.300576 | -1.272395 | -0.299867 |
| H | -0.037323 | 1.524629  | -0.245709 |
| H | 0.036589  | 0.412058  | -1.605672 |
| H | 2.134906  | 0.278805  | -0.212604 |
| H | 1.255262  | -1.259754 | -0.183644 |
| H | 1.153686  | -0.154826 | 1.193124  |
| O | 1.435813  | -2.731781 | 2.781548  |
| H | 1.626753  | -3.353339 | 3.508196  |
| H | 0.442538  | -2.631163 | 2.782947  |
| O | -2.462512 | -3.747239 | 0.452311  |
| H | -2.973355 | -4.556119 | 0.640315  |
| H | -3.098732 | -3.128243 | 0.006743  |
| O | -1.295313 | -2.628598 | 2.787022  |
| H | -1.700482 | -3.008996 | 1.973609  |
| H | -1.788403 | -1.790647 | 2.951613  |
| O | -0.174520 | -4.183972 | -1.165957 |
| H | -0.214549 | -3.506545 | -1.881243 |
| H | -0.983723 | -4.044380 | -0.622533 |
| O | -0.223896 | -2.251332 | -3.229013 |
| H | 0.658133  | -1.780958 | -3.202807 |
| H | -0.234785 | -2.716104 | -4.086392 |
| O | 4.652462  | -0.254129 | 0.564514  |
| H | 5.606342  | -0.368199 | 0.732509  |
| H | 4.398334  | -1.003113 | -0.036349 |
| O | 3.159925  | -0.494787 | 2.987347  |
| H | 3.667468  | -0.444802 | 2.143998  |
| H | 2.558497  | -1.270466 | 2.894684  |
| O | 3.780634  | -2.270411 | -1.118568 |
| H | 3.198238  | -2.895367 | -0.593173 |
| H | 4.491855  | -2.824407 | -1.490473 |
| O | 2.160662  | -3.905211 | 0.297511  |
| H | 1.913543  | -3.497421 | 1.160225  |
| H | 1.310104  | -4.006127 | -0.202573 |
| O | -2.703983 | -0.903283 | -3.080259 |
| H | -1.819052 | -1.338086 | -3.087113 |
| H | -3.175429 | -1.265826 | -2.294654 |
| O | 2.232703  | -1.094300 | -3.189561 |
| H | 2.247270  | -0.114636 | -3.077418 |

|   |           |           |           |
|---|-----------|-----------|-----------|
| H | 2.773068  | -1.463716 | -2.452631 |
| O | -2.793630 | -0.262841 | 3.195358  |
| H | -3.272831 | -0.274113 | 4.044434  |
| H | -2.177813 | 0.521758  | 3.246613  |
| O | 1.686323  | 1.788046  | 3.219165  |
| H | 1.989789  | 2.211821  | 4.043381  |
| H | 2.214850  | 0.942442  | 3.150251  |
| O | 4.015360  | 2.205394  | -0.732867 |
| H | 4.271361  | 1.339533  | -0.340064 |
| H | 3.457916  | 1.998586  | -1.518675 |
| O | 2.345787  | 3.505438  | 1.056287  |
| H | 2.122021  | 2.877460  | 1.782530  |
| H | 2.953272  | 3.016316  | 0.443865  |
| O | 0.189032  | 4.423006  | -0.270143 |
| H | 1.001160  | 4.095951  | 0.220144  |
| H | 0.310317  | 5.385665  | -0.368183 |
| O | -1.989392 | 3.720580  | 1.270113  |
| H | -1.221084 | 4.029683  | 0.721252  |
| H | -2.350045 | 4.524501  | 1.687868  |
| O | -2.518058 | 1.804034  | -2.802843 |
| H | -3.008518 | 2.172532  | -3.560978 |
| H | -2.558960 | 0.812810  | -2.922546 |
| O | -4.591368 | 0.070236  | 0.982800  |
| H | -3.969047 | -0.023005 | 1.741007  |
| H | -4.339819 | 0.914851  | 0.530089  |
| O | -4.119427 | -1.916508 | -0.811189 |
| H | -4.315442 | -1.188310 | -0.151641 |
| H | -4.988398 | -2.280030 | -1.064154 |
| O | -3.890260 | 2.411391  | -0.373434 |
| H | -3.231651 | 2.894066  | 0.177446  |
| H | -3.425063 | 2.215256  | -1.219588 |
| O | 0.006585  | 3.123667  | -2.774051 |
| H | 0.038500  | 3.587323  | -1.904825 |
| H | -0.832592 | 2.606682  | -2.766893 |
| O | 2.336111  | 1.713430  | -2.974569 |
| H | 2.751838  | 2.063216  | -3.784358 |
| H | 1.462923  | 2.194211  | -2.901994 |
| O | -1.143760 | 1.894805  | 3.254715  |
| H | -0.165467 | 1.786710  | 3.205358  |
| H | -1.386626 | 2.539008  | 2.549595  |

**Table S96.** MP2/6-31+G\*/PCM optimized Cartesian coordinates of the  $C_3H_8@(H_2O)_{26}$   $5^{12}6^3$  propane-clathrate.

|   |          |           |           |
|---|----------|-----------|-----------|
| O | 4.067118 | -1.447639 | 2.128397  |
| H | 4.784744 | -1.864808 | 2.639288  |
| H | 3.517491 | -2.202703 | 1.771027  |
| O | 2.477317 | -3.335943 | -1.675472 |
| H | 2.876042 | -4.149767 | -2.035559 |
| H | 1.573277 | -3.287705 | -2.082154 |
| O | 2.555259 | -3.472445 | 1.141463  |
| H | 2.460420 | -3.414413 | 0.162321  |
| H | 1.642798 | -3.452228 | 1.512457  |
| O | 4.064513 | -1.057433 | -2.345007 |
| H | 3.459188 | -0.399589 | -2.760074 |

|   |           |           |           |
|---|-----------|-----------|-----------|
| H | 3.500542  | -1.834235 | -2.127253 |
| O | 2.371871  | 0.874454  | -3.526553 |
| H | 2.321246  | 1.700476  | -2.964663 |
| H | 2.729006  | 1.167943  | -4.384878 |
| O | 2.332634  | 2.769582  | 2.437845  |
| H | 2.766383  | 3.377194  | 3.065640  |
| H | 2.945213  | 2.726545  | 1.657326  |
| O | 2.419862  | 0.227471  | 3.690670  |
| H | 2.368808  | 1.095531  | 3.228394  |
| H | 3.016945  | -0.333333 | 3.142227  |
| O | 3.990922  | 2.596226  | 0.224699  |
| H | 4.395874  | 1.682197  | 0.136196  |
| H | 4.743637  | 3.215215  | 0.257942  |
| O | 5.026202  | 0.114718  | -0.017211 |
| H | 4.703922  | -0.445621 | 0.727596  |
| H | 4.686864  | -0.321050 | -0.840915 |
| O | -0.014732 | -0.506097 | -4.027563 |
| H | 0.812952  | -0.026055 | -3.788235 |
| H | 0.037896  | -1.393672 | -3.602489 |
| O | 2.332864  | 3.107297  | -1.999329 |
| H | 1.455411  | 3.422192  | -1.677074 |
| H | 2.885269  | 2.955341  | -1.197409 |
| O | -2.367545 | -3.552537 | 1.136923  |
| H | -2.825036 | -4.379644 | 1.377789  |
| H | -2.940257 | -2.818182 | 1.506560  |
| O | -2.318996 | 0.190951  | 3.683880  |
| H | -2.693021 | 0.299565  | 4.577639  |
| H | -1.430705 | -0.250147 | 3.821128  |
| O | -0.118979 | 3.991583  | 1.695490  |
| H | 0.727960  | 3.552685  | 1.940653  |
| H | -0.101275 | 4.067781  | 0.712840  |
| O | -2.463551 | 2.706272  | 2.416564  |
| H | -2.300565 | 1.829557  | 2.836233  |
| H | -1.580384 | 3.094407  | 2.189248  |
| O | -4.065780 | 2.518352  | 0.262547  |
| H | -3.480207 | 2.598137  | 1.073826  |
| H | -4.754715 | 3.200511  | 0.366897  |
| O | -5.040685 | -0.062149 | 0.044473  |
| H | -4.754035 | 0.884812  | 0.128724  |
| H | -6.014908 | -0.044734 | 0.077568  |
| O | -2.369228 | 0.729515  | -3.556929 |
| H | -2.713062 | 0.942908  | -4.443924 |
| H | -1.478702 | 0.302500  | -3.715468 |
| O | -2.383958 | -3.387952 | -1.687493 |
| H | -2.360864 | -3.434671 | -0.703313 |
| H | -2.969620 | -2.616909 | -1.902991 |
| O | 0.005276  | -3.098805 | -2.909236 |
| H | -0.860146 | -3.213924 | -2.415251 |
| H | -0.041316 | -3.729034 | -3.652223 |
| O | -4.002231 | -1.227214 | -2.332932 |
| H | -4.368607 | -0.814199 | -1.517711 |
| H | -3.445523 | -0.529406 | -2.751178 |
| O | -2.445178 | 3.056481  | -1.985705 |
| H | -3.024547 | 2.844180  | -1.217111 |
| H | -2.380428 | 2.227201  | -2.515726 |
| O | -0.126188 | 4.165534  | -1.125303 |
| H | -0.179936 | 5.089127  | -1.432908 |
| H | -0.961005 | 3.728408  | -1.459721 |

|   |           |           |           |
|---|-----------|-----------|-----------|
| O | -3.905337 | -1.566753 | 2.150193  |
| H | -3.361839 | -0.937861 | 2.682217  |
| H | -4.303513 | -1.028261 | 1.426933  |
| O | 0.060828  | -3.443752 | 2.459706  |
| H | 0.053776  | -4.216833 | 3.054128  |
| H | -0.796720 | -3.495320 | 1.960722  |
| O | 0.023938  | -1.097609 | 4.047002  |
| H | 0.868044  | -0.602705 | 3.885879  |
| H | 0.065652  | -1.901775 | 3.479800  |
| C | -1.261338 | -0.141609 | 0.048595  |
| C | -0.015398 | 0.676646  | -0.278553 |
| C | 1.260570  | -0.144892 | -0.119762 |
| H | -2.175409 | 0.449429  | -0.065565 |
| H | -1.222780 | -0.506343 | 1.081258  |
| H | -1.337261 | -1.012050 | -0.612150 |
| H | 0.029265  | 1.555910  | 0.374506  |
| H | -0.082830 | 1.054051  | -1.306078 |
| H | 2.151813  | 0.443344  | -0.356349 |
| H | 1.245329  | -1.015352 | -0.785377 |
| H | 1.360701  | -0.512348 | 0.908146  |

---

**Table S97.** MP2/6-31+G\*/PCM optimized Cartesian coordinates of the  $C_3H_8@(H_2O)_{28}$   $5^{12}6^4-T_d$  propane-clathrate.

|   |           |           |           |
|---|-----------|-----------|-----------|
| O | -2.451143 | -1.147584 | 3.981240  |
| H | -1.708458 | -1.800344 | 3.890792  |
| H | -2.901058 | -1.380128 | 4.814380  |
| O | 4.668071  | 1.022908  | 1.179715  |
| H | 4.535486  | 1.082866  | 0.205807  |
| H | 4.454797  | 0.091060  | 1.417736  |
| O | -0.081136 | -3.737953 | -2.981699 |
| H | -0.096491 | -4.529771 | -3.550458 |
| H | 0.324913  | -4.034482 | -2.124944 |
| O | -2.022840 | 3.856765  | -2.069479 |
| H | -1.256988 | 3.530918  | -2.596789 |
| H | -2.673867 | 3.118568  | -2.033210 |
| O | -0.391025 | 0.459317  | -4.382675 |
| H | -0.146276 | 1.352799  | -4.046737 |
| H | -1.294142 | 0.273627  | -4.037545 |
| O | -2.998937 | -0.194362 | -3.482391 |
| H | -3.608603 | -0.211035 | -4.243354 |
| H | -3.370492 | 0.491680  | -2.867658 |
| O | 1.920824  | -1.414785 | 3.751583  |
| H | 1.759564  | -0.448958 | 3.870905  |
| H | 2.632819  | -1.497400 | 3.073667  |
| O | -0.928998 | -4.290040 | 1.271329  |
| H | -1.750964 | -3.895823 | 0.894011  |
| H | -0.712425 | -3.767362 | 2.078474  |
| O | -3.279174 | -3.261498 | 0.108968  |
| H | -3.082970 | -3.065417 | -0.851721 |
| H | -3.955322 | -3.963760 | 0.094218  |
| O | 1.601519  | 4.310912  | 0.570710  |
| H | 0.600396  | 4.331445  | 0.567482  |
| H | 1.876093  | 5.237615  | 0.697581  |
| O | -2.718810 | 3.022460  | 2.282497  |

|   |           |           |           |
|---|-----------|-----------|-----------|
| H | -2.210958 | 2.463578  | 2.937320  |
| H | -3.222313 | 3.658647  | 2.822794  |
| O | -4.471890 | 1.402298  | 0.758939  |
| H | -3.858466 | 1.953390  | 1.298926  |
| H | -4.350331 | 0.473455  | 1.082490  |
| O | 3.608617  | -1.255038 | -2.578929 |
| H | 2.778109  | -1.342492 | -3.135393 |
| H | 4.332935  | -1.565233 | -3.153937 |
| O | -4.222599 | -1.174131 | 1.758469  |
| H | -3.606632 | -1.187711 | 2.526227  |
| H | -3.887435 | -1.866969 | 1.143518  |
| O | 4.261343  | 1.261154  | -1.623329 |
| H | 5.091921  | 1.487503  | -2.081538 |
| H | 3.992266  | 0.380372  | -1.994801 |
| O | 1.038537  | -4.466722 | -0.560956 |
| H | 0.328181  | -4.378462 | 0.140450  |
| H | 1.291911  | -5.408462 | -0.551880 |
| O | -1.092377 | 4.436478  | 0.473696  |
| H | -1.630677 | 3.914988  | 1.114243  |
| H | -1.443862 | 4.212111  | -0.425684 |
| O | -0.328379 | -2.891533 | 3.632288  |
| H | 0.519952  | -2.359493 | 3.641556  |
| H | -0.240207 | -3.531429 | 4.362806  |
| O | 0.268278  | 3.049078  | -3.517178 |
| H | 0.415960  | 3.629687  | -4.286084 |
| H | 1.082911  | 3.151979  | -2.946840 |
| O | 2.938688  | 2.748803  | 2.495819  |
| H | 3.539086  | 2.139815  | 1.994418  |
| H | 2.440442  | 3.262850  | 1.818287  |
| O | -2.704913 | -2.812511 | -2.495951 |
| H | -1.779718 | -3.091471 | -2.688989 |
| H | -2.788263 | -1.882755 | -2.812004 |
| O | -1.412600 | 1.476055  | 4.075575  |
| H | -1.733565 | 0.544696  | 4.052122  |
| H | -0.427375 | 1.431467  | 4.060969  |
| O | 1.406709  | -1.607317 | -4.081914 |
| H | 0.883305  | -2.355832 | -3.712814 |
| H | 0.772611  | -0.848585 | -4.156104 |
| O | -3.982755 | 1.814165  | -1.861462 |
| H | -4.831848 | 2.150277  | -2.203549 |
| H | -4.147978 | 1.622071  | -0.890894 |
| O | 4.023795  | -1.648514 | 1.904650  |
| H | 4.780706  | -2.109724 | 2.310330  |
| H | 3.799908  | -2.173269 | 1.083889  |
| O | 1.392095  | 1.317679  | 4.175125  |
| H | 1.682019  | 1.578146  | 5.068771  |
| H | 1.943430  | 1.870495  | 3.546355  |
| O | 3.440976  | -3.001062 | -0.366969 |
| H | 3.465526  | -2.404443 | -1.151662 |
| H | 2.571441  | -3.463609 | -0.401889 |
| O | 2.451207  | 3.402829  | -1.950900 |
| H | 2.184072  | 3.695278  | -1.047189 |
| H | 3.049689  | 2.629945  | -1.826209 |
| C | 1.249758  | 0.137091  | 0.070240  |
| C | 0.015632  | -0.681638 | -0.302131 |
| C | -1.249666 | 0.173160  | -0.305686 |
| H | 2.154037  | -0.477562 | 0.075574  |
| H | 1.135565  | 0.578939  | 1.067440  |

|   |           |           |           |
|---|-----------|-----------|-----------|
| H | 1.399667  | 0.956081  | -0.643027 |
| H | -0.103298 | -1.512145 | 0.406098  |
| H | 0.158865  | -1.132577 | -1.292632 |
| H | -2.136275 | -0.414134 | -0.563262 |
| H | -1.161500 | 0.990754  | -1.031130 |
| H | -1.418843 | 0.619243  | 0.681597  |

---

**Table S98.** MP2/6-31+G\*/PCM optimized Cartesian coordinates of the  $i\text{-C}_4\text{H}_{10} @ (\text{H}_2\text{O})_{28}$   $5^{12}6^4\text{-}T_d$  isobutane-clathrate.

|   |           |           |           |
|---|-----------|-----------|-----------|
| O | 0.548501  | -0.202393 | 4.586254  |
| H | 1.339287  | 0.285117  | 4.234964  |
| H | 0.671646  | -0.236142 | 5.552876  |
| O | -0.108026 | 4.797577  | -1.334268 |
| H | -0.162941 | 4.165995  | -2.088034 |
| H | 0.753069  | 4.597791  | -0.900199 |
| O | 3.853225  | -2.284780 | -1.997203 |
| H | 4.620262  | -2.668295 | -2.461342 |
| H | 4.220849  | -1.548042 | -1.442409 |
| O | -4.315640 | -2.192330 | -1.290520 |
| H | -3.783412 | -1.842479 | -2.042770 |
| H | -3.724542 | -2.833926 | -0.833390 |
| O | -0.385769 | -2.568979 | -3.520680 |
| H | -1.215081 | -2.043071 | -3.436102 |
| H | -0.372821 | -3.188728 | -2.756156 |
| O | -0.244187 | -4.425990 | -1.373984 |
| H | -0.325059 | -5.319785 | -1.756184 |
| H | -1.056262 | -4.314088 | -0.812601 |
| O | 1.686881  | 3.456143  | 2.520198  |
| H | 0.702318  | 3.496653  | 2.566552  |
| H | 1.925675  | 3.693424  | 1.592679  |
| O | 4.129039  | -0.831149 | 2.094329  |
| H | 3.588885  | -1.656556 | 2.094375  |
| H | 3.582310  | -0.140649 | 2.535353  |
| O | 2.680003  | -3.258168 | 2.074762  |
| H | 2.576697  | -3.616684 | 1.147705  |
| H | 3.179361  | -3.940331 | 2.560504  |
| O | -3.956661 | 2.316892  | -0.727084 |
| H | -4.252611 | 1.466422  | -0.289094 |
| H | -4.782239 | 2.792949  | -0.934136 |
| O | -3.650275 | -0.659145 | 2.854111  |
| H | -2.995729 | 0.012349  | 3.198559  |
| H | -4.342519 | -0.716316 | 3.538144  |
| O | -2.344994 | -3.156931 | 2.562771  |
| H | -2.789540 | -2.282849 | 2.664045  |
| H | -1.402157 | -3.010808 | 2.828872  |
| O | 2.035214  | 1.492547  | -3.639692 |
| H | 1.968825  | 0.492293  | -3.691360 |
| H | 2.488664  | 1.757432  | -4.461977 |
| O | 0.253919  | -2.768784 | 3.431066  |
| H | 0.386414  | -1.877495 | 3.827592  |
| H | 1.069663  | -2.949684 | 2.908716  |
| O | -0.310884 | 2.946320  | -3.482807 |
| H | -0.360184 | 3.409678  | -4.339575 |



|   |           |           |           |
|---|-----------|-----------|-----------|
| H | 0.507938  | 2.386610  | -3.538753 |
| O | 4.775903  | -0.168141 | -0.441696 |
| H | 4.544886  | -0.387659 | 0.508311  |
| H | 5.748506  | -0.097311 | -0.462510 |
| O | -4.826014 | -0.009104 | 0.379118  |
| H | -4.393114 | -0.216914 | 1.240287  |
| H | -4.641573 | -0.789750 | -0.202596 |
| O | 2.702642  | 1.158720  | 3.508849  |
| H | 2.340778  | 1.997238  | 3.096603  |
| H | 3.314419  | 1.462304  | 4.205186  |
| O | -2.805236 | -1.132241 | -3.435425 |
| H | -3.259675 | -1.273872 | -4.286230 |
| H | -2.743913 | -0.140003 | -3.331744 |
| O | -2.232488 | 4.287987  | 0.399662  |
| H | -1.493479 | 4.442360  | -0.242401 |
| H | -2.787350 | 3.568259  | 0.020914  |
| O | 2.442351  | -4.202517 | -0.462330 |
| H | 2.898100  | -3.551536 | -1.044813 |
| H | 1.505546  | -4.241037 | -0.763182 |
| O | -1.853974 | 1.093800  | 3.870103  |
| H | -0.998563 | 0.669176  | 4.112421  |
| H | -1.621300 | 1.945457  | 3.429939  |
| O | 1.980637  | -1.187208 | -3.811301 |
| H | 2.611781  | -1.584568 | -3.167957 |
| H | 1.116397  | -1.652540 | -3.669825 |
| O | -2.608302 | -4.059598 | 0.039842  |
| H | -3.079198 | -4.909546 | 0.124474  |
| H | -2.492065 | -3.727976 | 0.979618  |
| O | 2.399569  | 4.193771  | -0.092107 |
| H | 3.002161  | 4.960165  | -0.088884 |
| H | 2.893124  | 3.470081  | -0.571055 |
| O | -1.125110 | 3.565545  | 2.755181  |
| H | -1.373273 | 4.272503  | 3.379152  |
| H | -1.552487 | 3.819113  | 1.885157  |
| O | 3.688134  | 2.243151  | -1.486759 |
| H | 3.121195  | 1.939503  | -2.234601 |
| H | 4.041443  | 1.424541  | -1.067458 |
| O | -2.735191 | 1.558760  | -3.148723 |
| H | -3.130367 | 1.852719  | -2.294162 |
| H | -1.864459 | 2.014206  | -3.224925 |
| C | -0.017650 | -0.011125 | -0.631468 |
| C | -1.289897 | -0.707072 | -0.159473 |
| C | 1.215909  | -0.707390 | -0.065925 |
| C | -0.034488 | 1.459920  | -0.230283 |
| H | 0.022315  | -0.071277 | -1.729130 |
| H | -2.181248 | -0.225132 | -0.571587 |
| H | -1.360975 | -0.666378 | 0.935478  |
| H | -1.302093 | -1.760290 | -0.458436 |
| H | 2.137581  | -0.235752 | -0.421516 |
| H | 1.239936  | -1.764302 | -0.349842 |
| H | 1.209724  | -0.652514 | 1.030805  |
| H | 0.867287  | 1.975211  | -0.575795 |
| H | -0.081744 | 1.555608  | 0.862553  |
| H | -0.904478 | 1.973095  | -0.649571 |

---

**Table S99.** MP2/6-31+G\*/PCM optimized Cartesian coordinates of the neo-C<sub>5</sub>H<sub>12</sub>@(H<sub>2</sub>O)<sub>28</sub> 5<sup>12</sup>6<sup>4</sup>-T<sub>d</sub> neopentane-clathrate.

|   |           |           |           |
|---|-----------|-----------|-----------|
| O | 3.494352  | -1.492159 | -2.924384 |
| H | 3.852424  | -1.345774 | -2.009813 |
| H | 4.268787  | -1.730860 | -3.467127 |
| O | -0.579239 | -3.247068 | 3.650577  |
| H | -1.210461 | -2.500739 | 3.769997  |
| H | 0.315755  | -2.835888 | 3.670787  |
| O | 1.196917  | 4.252257  | 1.857085  |
| H | 1.422832  | 5.121271  | 2.237470  |
| H | 1.943957  | 3.649220  | 2.110355  |
| O | -4.201064 | 0.345071  | -2.485177 |
| H | -4.325635 | 0.627131  | -1.549202 |
| H | -3.546825 | 0.972558  | -2.870933 |
| O | -3.149348 | 3.449768  | 0.637543  |
| H | -3.636056 | 2.603008  | 0.504639  |
| H | -2.686891 | 3.625534  | -0.213822 |
| O | -1.715927 | 3.995413  | -1.767490 |
| H | -2.011753 | 4.832389  | -2.171475 |
| H | -1.879306 | 3.303022  | -2.459649 |
| O | 3.249635  | -2.902428 | 1.202817  |
| H | 2.602605  | -3.459396 | 0.708905  |
| H | 2.787343  | -2.597037 | 2.019219  |
| O | 4.481734  | 1.749150  | 0.196896  |
| H | 4.002652  | 2.169351  | -0.555579 |
| H | 4.421618  | 0.778962  | 0.035541  |
| O | 3.064749  | 2.960572  | -1.948870 |
| H | 2.277930  | 3.476300  | -1.612249 |
| H | 3.618902  | 3.612462  | -2.416694 |
| O | -3.245448 | -3.209700 | 0.039678  |
| H | -3.180651 | -2.853080 | -0.893620 |
| H | -3.910987 | -3.921149 | -0.005659 |
| O | -0.730913 | -2.347404 | -3.935857 |
| H | 0.075256  | -2.795455 | -3.552008 |
| H | -0.907197 | -2.815469 | -4.772879 |
| O | -0.293202 | 0.404127  | -4.509862 |
| H | -0.428254 | -0.543757 | -4.275930 |
| H | 0.626640  | 0.624052  | -4.214914 |
| O | -0.934506 | 1.218375  | 4.346586  |
| H | -1.136689 | 1.986169  | 3.735908  |
| H | -1.062341 | 1.569310  | 5.247770  |
| O | 2.332754  | 0.945842  | -3.802440 |
| H | 2.763034  | 0.118557  | -3.485720 |
| H | 2.556780  | 1.637468  | -3.137210 |
| O | -2.440352 | -1.098310 | 3.988140  |
| H | -2.962223 | -1.210701 | 4.804321  |
| H | -1.936577 | -0.253133 | 4.115350  |
| O | 3.220835  | 2.463060  | 2.507102  |
| H | 3.682087  | 2.173591  | 1.667591  |
| H | 3.920175  | 2.854721  | 3.062907  |
| O | -3.157089 | -2.234544 | -2.478023 |
| H | -2.288333 | -2.246214 | -2.942368 |
| H | -3.485632 | -1.300072 | -2.508214 |
| O | 4.455916  | -1.043643 | -0.351932 |
| H | 3.986241  | -1.690750 | 0.250375  |

|   |           |           |           |
|---|-----------|-----------|-----------|
| H | 5.394505  | -1.308106 | -0.318537 |
| O | -4.613627 | 1.064441  | 0.233650  |
| H | -5.560125 | 1.252606  | 0.373111  |
| H | -4.418929 | 0.273141  | 0.811609  |
| O | -0.906777 | -4.375468 | 1.118563  |
| H | -0.800513 | -3.946085 | 2.005229  |
| H | -1.687345 | -3.939509 | 0.703905  |
| O | 0.975987  | 4.388480  | -0.959594 |
| H | 0.997196  | 4.329722  | 0.023482  |
| H | 0.052683  | 4.178508  | -1.232249 |
| O | 1.529004  | -3.554623 | -2.965140 |
| H | 2.225882  | -2.858813 | -2.933823 |
| H | 1.439965  | -3.870135 | -2.035202 |
| O | -1.342369 | 3.348884  | 2.743173  |
| H | -0.476409 | 3.667071  | 2.399570  |
| H | -1.969245 | 3.350162  | 1.975178  |
| O | -2.273314 | 2.050346  | -3.678359 |
| H | -2.622064 | 2.445148  | -4.499082 |
| H | -1.523187 | 1.453535  | -3.969306 |
| O | 2.023861  | -2.100422 | 3.604910  |
| H | 2.563316  | -2.443170 | 4.341493  |
| H | 1.972172  | -1.113510 | 3.754867  |
| O | 1.417141  | -4.480327 | -0.279231 |
| H | 1.666639  | -5.422304 | -0.242829 |
| H | 0.541474  | -4.423488 | 0.201486  |
| O | 1.815514  | 0.559695  | 4.092069  |
| H | 0.867366  | 0.827732  | 4.122072  |
| H | 2.266773  | 1.187443  | 3.481920  |
| O | -4.182346 | -1.161293 | 1.744161  |
| H | -3.843684 | -1.888104 | 1.169575  |
| H | -3.553413 | -1.102025 | 2.500421  |
| C | 0.045839  | -0.043991 | -0.010744 |
| C | -0.974225 | 0.800579  | -0.769276 |
| C | 1.229553  | 0.829099  | 0.394828  |
| C | 0.534430  | -1.175325 | -0.910753 |
| C | -0.599953 | -0.632211 | 1.240416  |
| H | -1.826726 | 0.189284  | -1.086928 |
| H | -0.518294 | 1.240102  | -1.664120 |
| H | -1.350264 | 1.614405  | -0.139988 |
| H | 1.972572  | 0.241079  | 0.946411  |
| H | 0.901751  | 1.654425  | 1.037795  |
| H | 1.717448  | 1.255522  | -0.488065 |
| H | 1.297686  | -1.773803 | -0.402563 |
| H | 0.970229  | -0.776623 | -1.833682 |
| H | -0.294874 | -1.839048 | -1.183151 |
| H | -1.440554 | -1.282527 | 0.975981  |
| H | -0.973909 | 0.164673  | 1.893406  |
| H | 0.125772  | -1.226554 | 1.806388  |

**Table S100.** MP2/6-31+G\*/PCM optimized Cartesian coordinates of the cyc-C<sub>5</sub>H<sub>10</sub>@(H<sub>2</sub>O)<sub>28</sub> 5<sup>12</sup>6<sup>4</sup>-T<sub>d</sub> cyclopentane-clathrate.

|   |          |          |           |
|---|----------|----------|-----------|
| O | 0.446032 | 4.445988 | -1.639309 |
|---|----------|----------|-----------|

|   |           |           |           |
|---|-----------|-----------|-----------|
| H | 1.291874  | 4.226103  | -1.167846 |
| H | 0.584300  | 5.333983  | -2.017965 |
| O | 3.623900  | -2.736292 | -1.754994 |
| H | 3.084956  | -3.273488 | -1.129710 |
| H | 3.992347  | -1.993440 | -1.221949 |
| O | 0.318734  | 0.125604  | 4.682389  |
| H | 0.406802  | 0.168275  | 5.652557  |
| H | 1.154564  | 0.523923  | 4.322593  |
| O | -4.268713 | -1.898429 | -1.277746 |
| H | -3.765099 | -2.532246 | -0.716089 |
| H | -4.396023 | -1.084763 | -0.737643 |
| O | -2.632277 | -2.732823 | 2.771103  |
| H | -2.686833 | -3.135721 | 1.873020  |
| H | -3.044076 | -1.842471 | 2.686757  |
| O | -3.777931 | -0.127964 | 2.649434  |
| H | -4.559562 | -0.107286 | 3.232773  |
| H | -4.118905 | 0.133283  | 1.754246  |
| O | 4.065546  | 1.793918  | -1.701775 |
| H | 3.485821  | 1.495016  | -2.441981 |
| H | 4.268942  | 0.980830  | -1.182247 |
| O | 1.908079  | 3.518548  | 2.361246  |
| H | 0.926088  | 3.614564  | 2.362011  |
| H | 2.185697  | 3.540336  | 1.415959  |
| O | -0.909829 | 3.795871  | 2.494454  |
| H | -1.295424 | 2.991867  | 2.945566  |
| H | -1.135208 | 4.547123  | 3.074011  |
| O | -0.521477 | -2.770197 | -3.511504 |
| H | -1.326422 | -2.173888 | -3.513246 |
| H | -0.638438 | -3.354694 | -4.283418 |
| O | -2.506521 | 1.553226  | -3.576544 |
| H | -1.563815 | 1.882299  | -3.615096 |
| H | -2.926492 | 1.880920  | -4.393213 |
| O | -3.806365 | 2.607912  | -1.285693 |
| H | -3.350341 | 2.253700  | -2.084601 |
| H | -3.130017 | 3.166978  | -0.825232 |
| O | 2.213946  | -3.247214 | 2.506919  |
| H | 1.344054  | -3.007748 | 2.943237  |
| H | 2.649869  | -3.865206 | 3.122958  |
| O | -1.939878 | 4.288995  | -0.086641 |
| H | -1.118764 | 4.351121  | -0.625300 |
| H | -1.625729 | 4.075191  | 0.822788  |
| O | 2.008603  | -4.323836 | -0.031374 |
| H | 2.344658  | -5.237562 | 0.027101  |
| H | 2.055807  | -3.967571 | 0.894246  |
| O | 2.612815  | 1.222457  | 3.593127  |
| H | 2.367997  | 2.066574  | 3.111320  |
| H | 3.239206  | 1.496843  | 4.288690  |
| O | -2.754966 | -1.251984 | -3.506173 |
| H | -2.635599 | -0.273252 | -3.507176 |
| H | -3.301409 | -1.459903 | -2.705445 |
| O | 2.781391  | 3.741166  | -0.316416 |
| H | 3.243527  | 2.990384  | -0.792624 |
| H | 3.422787  | 4.476315  | -0.323953 |
| O | -2.829350 | -3.851637 | 0.197390  |
| H | -3.318576 | -4.694963 | 0.195276  |
| H | -1.972514 | -4.042379 | -0.280081 |
| O | 2.058190  | -1.663204 | -3.769822 |
| H | 2.593537  | -2.065860 | -3.038756 |

|   |           |           |           |
|---|-----------|-----------|-----------|
| H | 1.139052  | -1.999785 | -3.653076 |
| O | -1.890071 | 1.629608  | 3.794437  |
| H | -1.139924 | 1.067303  | 4.097641  |
| H | -2.523438 | 1.024571  | 3.343036  |
| O | 0.014281  | 2.533569  | -3.663230 |
| H | 0.189740  | 3.192152  | -2.951417 |
| H | 0.815479  | 1.959308  | -3.705648 |
| O | -0.052085 | -2.516276 | 3.762434  |
| H | 0.042907  | -1.588644 | 4.079228  |
| H | -0.958196 | -2.584185 | 3.365719  |
| O | -4.749478 | 0.512308  | 0.138082  |
| H | -5.713528 | 0.657946  | 0.163331  |
| H | -4.376997 | 1.299272  | -0.360280 |
| O | 4.715875  | -0.569143 | -0.290000 |
| H | 5.684535  | -0.668458 | -0.238681 |
| H | 4.390282  | -0.672042 | 0.649230  |
| O | 2.371560  | 1.012853  | -3.827457 |
| H | 2.798116  | 1.197341  | -4.684722 |
| H | 2.231904  | 0.020649  | -3.810094 |
| O | 3.839667  | -0.934208 | 2.250488  |
| H | 3.241587  | -1.711903 | 2.344180  |
| H | 3.374040  | -0.174366 | 2.670916  |
| O | -0.564826 | -4.397042 | -1.204551 |
| H | -0.517126 | -3.807030 | -1.993637 |
| H | 0.310651  | -4.323052 | -0.758446 |
| C | 0.680033  | -1.075802 | -0.108625 |
| C | -0.866124 | -0.940849 | -0.080371 |
| C | -1.155248 | 0.574825  | -0.090218 |
| C | 0.137037  | 1.208456  | 0.428567  |
| C | 1.217006  | 0.359351  | -0.241578 |
| H | 1.039758  | -1.519049 | 0.826994  |
| H | 1.025508  | -1.720929 | -0.921469 |
| H | -1.273155 | -1.402358 | 0.825108  |
| H | -1.334537 | -1.442078 | -0.932077 |
| H | -2.033462 | 0.844564  | 0.504781  |
| H | -1.338943 | 0.919003  | -1.115800 |
| H | 0.214594  | 2.273814  | 0.192366  |
| H | 0.199999  | 1.099866  | 1.520638  |
| H | 1.295626  | 0.640673  | -1.300034 |
| H | 2.206900  | 0.484166  | 0.207830  |

**Table S101.** MP2/6-31+G\*/PCM optimized Cartesian coordinates of the neo-C<sub>5</sub>H<sub>12</sub>@(H<sub>2</sub>O)<sub>30</sub>-4<sup>15</sup>10<sup>6</sup>-C<sub>2v</sub> neopentane-clathrate.

|   |           |           |           |
|---|-----------|-----------|-----------|
| O | -1.239482 | 4.510826  | -0.952799 |
| H | -0.258638 | 4.486022  | -0.866374 |
| H | -1.594963 | 4.261973  | -0.067473 |
| O | -4.196360 | -0.520874 | 2.218183  |
| H | -4.211033 | -1.183684 | 1.487550  |
| H | -4.225676 | 0.363523  | 1.784300  |
| O | 3.784735  | -0.662233 | 2.883886  |
| H | 4.597899  | -0.784201 | 3.408834  |
| H | 3.854095  | -1.331327 | 2.140317  |
| O | 4.173184  | 1.871341  | 1.693433  |

|   |           |           |           |
|---|-----------|-----------|-----------|
| H | 3.402898  | 2.472108  | 1.819416  |
| H | 3.941451  | 1.014761  | 2.121049  |
| O | 1.662647  | -1.042851 | 4.618530  |
| H | 2.409394  | -0.921888 | 3.975151  |
| H | 2.090251  | -1.232935 | 5.474031  |
| O | 1.585316  | -3.854967 | -2.589947 |
| H | 1.956455  | -4.600943 | -3.096568 |
| H | 2.043915  | -3.048715 | -2.941318 |
| O | 2.097233  | -4.232456 | 0.189190  |
| H | 1.851839  | -4.083950 | -0.752286 |
| H | 1.259857  | -4.202342 | 0.707187  |
| O | -4.388448 | 2.041211  | 1.039531  |
| H | -5.238276 | 2.419457  | 1.333143  |
| H | -4.470484 | 1.943212  | 0.043475  |
| O | -0.141553 | 3.237190  | 3.234865  |
| H | -0.945357 | 3.327026  | 2.673835  |
| H | -0.235332 | 2.392846  | 3.744719  |
| O | -0.261779 | -4.340795 | 1.745236  |
| H | -0.314509 | -5.259452 | 2.067802  |
| H | -0.317971 | -3.775176 | 2.567178  |
| O | 4.756597  | -1.101003 | -1.542783 |
| H | 4.793247  | -0.118018 | -1.341849 |
| H | 5.665324  | -1.350622 | -1.793960 |
| O | -2.337720 | 3.817912  | 1.554618  |
| H | -2.766556 | 4.608341  | 1.932435  |
| H | -3.077970 | 3.173624  | 1.397231  |
| O | -2.296699 | -4.106058 | -0.198441 |
| H | -1.575702 | -4.120508 | 0.472810  |
| H | -1.865987 | -3.972140 | -1.081321 |
| O | 2.136363  | 3.810595  | 1.912296  |
| H | 2.513121  | 4.555390  | 2.417032  |
| H | 1.299411  | 3.559915  | 2.402908  |
| O | -4.358587 | -2.409063 | 0.148829  |
| H | -5.142181 | -2.974135 | 0.279718  |
| H | -3.586765 | -3.040756 | 0.058658  |
| O | -2.443093 | -0.896554 | 4.245537  |
| H | -3.062072 | -0.750845 | 3.474614  |
| H | -3.023457 | -1.050411 | 5.013514  |
| O | 1.582276  | 4.554801  | -0.697433 |
| H | 1.870696  | 5.483223  | -0.779317 |
| H | 1.796368  | 4.297804  | 0.238935  |
| O | -0.360365 | 0.954912  | 4.791039  |
| H | -1.142865 | 0.391115  | 4.591738  |
| H | 0.405653  | 0.340972  | 4.722377  |
| O | -0.425209 | -2.867032 | 4.022880  |
| H | 0.363880  | -2.300641 | 4.185606  |
| H | -1.186432 | -2.241363 | 4.051293  |
| O | 4.065978  | -2.418314 | 0.864277  |
| H | 4.289881  | -1.966650 | 0.017519  |
| H | 3.327268  | -3.044006 | 0.649540  |
| O | -1.236430 | -3.770415 | -2.733237 |
| H | -1.523172 | -2.911896 | -3.122673 |
| H | -0.252014 | -3.754046 | -2.733110 |
| O | 4.818092  | 1.522803  | -0.967150 |
| H | 4.563517  | 1.664425  | -0.018563 |
| H | 4.164422  | 2.030274  | -1.501811 |
| O | -4.575384 | -0.933483 | -2.261762 |
| H | -4.483034 | -1.462286 | -1.435539 |

|   |           |           |           |
|---|-----------|-----------|-----------|
| H | -3.771996 | -1.129215 | -2.798263 |
| O | -4.581447 | 1.763651  | -1.633674 |
| H | -4.560669 | 0.799501  | -1.866693 |
| H | -3.798465 | 2.163837  | -2.079695 |
| O | -2.350238 | 2.975627  | -2.889140 |
| H | -2.663275 | 3.616844  | -3.553670 |
| H | -1.896614 | 3.526018  | -2.188894 |
| O | -2.305653 | -1.427848 | -3.879430 |
| H | -1.793295 | -0.576769 | -3.999510 |
| H | -2.611065 | -1.666571 | -4.774061 |
| O | 2.922918  | -1.596377 | -3.538796 |
| H | 3.620154  | -1.419013 | -2.852164 |
| H | 3.415527  | -1.828734 | -4.348400 |
| O | 2.944788  | 2.961776  | -2.527628 |
| H | 2.431874  | 3.529483  | -1.896395 |
| H | 3.403596  | 3.587199  | -3.118705 |
| O | -1.016713 | 0.916697  | -4.278948 |
| H | -1.391453 | 1.655757  | -3.746077 |
| H | -0.033596 | 0.946340  | -4.162428 |
| O | 1.745415  | 0.943249  | -4.123583 |
| H | 2.133608  | 1.616791  | -3.520310 |
| H | 2.140592  | 0.080060  | -3.864558 |
| C | 0.164877  | -0.483746 | 1.347831  |
| C | -0.015606 | 0.005072  | -0.089486 |
| C | 0.666305  | 1.363420  | -0.257735 |
| C | 0.612580  | -1.007223 | -1.047108 |
| C | -1.507215 | 0.144795  | -0.399325 |
| H | -0.312303 | -1.460995 | 1.487399  |
| H | 1.229896  | -0.587868 | 1.592387  |
| H | -0.280373 | 0.218944  | 2.061988  |
| H | 0.538194  | 1.738998  | -1.280227 |
| H | 0.234319  | 2.097816  | 0.432153  |
| H | 1.741519  | 1.290987  | -0.050028 |
| H | 0.472487  | -0.699548 | -2.089598 |
| H | 0.154975  | -1.994477 | -0.917650 |
| H | 1.689816  | -1.103509 | -0.860391 |
| H | -1.659224 | 0.494054  | -1.427029 |
| H | -1.980145 | 0.865645  | 0.279212  |
| H | -2.023195 | -0.816712 | -0.285853 |

**Table S102.** MP2/6-31+G\*/PCM optimized Cartesian coordinates of the n-C<sub>4</sub>H<sub>10</sub> gauche@(H<sub>2</sub>O)<sub>28</sub> 5<sup>12</sup>6<sup>4</sup>-T<sub>d</sub> n-butane-clathrate.

|   |           |           |           |
|---|-----------|-----------|-----------|
| O | -4.957791 | 0.120379  | -0.883681 |
| H | -4.597288 | 0.979744  | -1.225674 |
| H | -5.910688 | 0.134727  | -1.090026 |
| O | 2.425540  | 0.405842  | -4.091909 |
| H | 3.108554  | 0.396708  | -3.382815 |
| H | 1.871978  | 1.204073  | -3.923680 |
| O | 1.164180  | 3.689442  | 2.753312  |
| H | 1.332989  | 4.465897  | 3.318464  |
| H | 0.710707  | 4.045670  | 1.945061  |
| O | 1.235438  | -4.111581 | 2.099953  |
| H | 2.024821  | -3.535331 | 1.975609  |

|   |           |           |           |
|---|-----------|-----------|-----------|
| H | 0.598607  | -3.592675 | 2.643069  |
| O | 3.202721  | -0.245625 | 3.268051  |
| H | 3.319287  | -1.017410 | 2.666440  |
| H | 2.303454  | -0.347805 | 3.655152  |
| O | 0.625315  | -0.467696 | 4.459774  |
| H | 0.734342  | -0.569567 | 5.423572  |
| H | 0.117251  | -1.270385 | 4.169722  |
| O | -1.927528 | 1.734698  | -3.633129 |
| H | -1.875669 | 0.756958  | -3.753702 |
| H | -0.995600 | 2.051501  | -3.573496 |
| O | -2.701242 | 3.757250  | 0.513758  |
| H | -2.865322 | 3.159794  | 1.281453  |
| H | -3.026042 | 3.273362  | -0.281488 |
| O | -3.115875 | 2.121688  | 2.775631  |
| H | -2.230748 | 2.026084  | 3.229428  |
| H | -3.691031 | 2.568199  | 3.423950  |
| O | 1.768204  | -3.595621 | -2.210478 |
| H | 1.112673  | -3.948945 | -1.540735 |
| H | 2.091396  | -4.380633 | -2.690072 |
| O | -2.654864 | -3.832195 | -0.276956 |
| H | -2.997744 | -3.194120 | -0.965837 |
| H | -3.198809 | -4.635224 | -0.376232 |
| O | -3.016498 | -2.630252 | 2.259463  |
| H | -2.917243 | -3.041020 | 1.368971  |
| H | -3.471619 | -1.761919 | 2.113411  |
| O | 4.037624  | 2.548201  | -0.438271 |
| H | 3.890665  | 2.410066  | 0.543524  |
| H | 4.798497  | 3.155176  | -0.501299 |
| O | -4.389138 | -0.246631 | 1.889764  |
| H | -4.592350 | -0.093213 | 0.939096  |
| H | -3.911395 | 0.561117  | 2.190180  |
| O | 4.404424  | 0.299647  | -2.041909 |
| H | 5.309297  | 0.367781  | -2.398653 |
| H | 4.301937  | 1.077883  | -1.434983 |
| O | -0.126227 | 4.583683  | 0.474758  |
| H | -1.071449 | 4.252584  | 0.453660  |
| H | -0.196450 | 5.556153  | 0.452745  |
| O | 0.073098  | -4.606389 | -0.368489 |
| H | -0.856023 | -4.278580 | -0.354249 |
| H | 0.450474  | -4.416392 | 0.528325  |
| O | -3.742953 | 2.455600  | -1.768268 |
| H | -3.042773 | 2.205389  | -2.439111 |
| H | -4.338526 | 3.071263  | -2.234550 |
| O | 3.575939  | -2.550011 | 1.678748  |
| H | 4.356638  | -3.031358 | 2.009702  |
| H | 3.735776  | -2.429401 | 0.699703  |
| O | 0.735878  | -1.788743 | -4.088802 |
| H | 1.354526  | -1.014795 | -4.057439 |
| H | 1.058798  | -2.419407 | -3.402948 |
| O | -0.697162 | 1.965209  | 3.987733  |
| H | -0.025052 | 2.547872  | 3.563464  |
| H | -0.256600 | 1.093249  | 4.119850  |
| O | -3.647197 | -2.091405 | -2.105834 |
| H | -4.086687 | -1.310696 | -1.697096 |
| H | -2.987653 | -1.729496 | -2.743653 |
| O | 3.578165  | 2.295229  | 2.216179  |
| H | 2.736900  | 2.772292  | 2.402158  |
| H | 3.438748  | 1.373240  | 2.551934  |



|   |           |           |           |
|---|-----------|-----------|-----------|
| O | -0.704701 | -2.740905 | 3.639586  |
| H | -0.932377 | -3.298417 | 4.406684  |
| H | -1.558182 | -2.648541 | 3.121557  |
| O | 0.742930  | 2.628945  | -3.647910 |
| H | 0.832641  | 3.266344  | -4.380243 |
| H | 1.098357  | 3.101794  | -2.841504 |
| O | -1.855968 | -1.054241 | -4.004107 |
| H | -2.193472 | -1.270530 | -4.892974 |
| H | -0.898982 | -1.351211 | -4.007241 |
| O | 1.768920  | 3.889048  | -1.492451 |
| H | 2.520186  | 3.405904  | -1.075293 |
| H | 1.108889  | 4.064892  | -0.782862 |
| O | 3.968685  | -2.310584 | -0.999198 |
| H | 3.188541  | -2.706312 | -1.454717 |
| H | 4.061361  | -1.392750 | -1.343675 |
| C | 1.646600  | 0.270615  | -0.097990 |
| C | 0.731865  | -0.840506 | 0.408975  |
| C | -0.647203 | -0.824192 | -0.249164 |
| C | -1.387820 | 0.496281  | -0.052897 |
| H | 2.663051  | 0.145229  | 0.283291  |
| H | 1.296958  | 1.258525  | 0.218970  |
| H | 1.690120  | 0.263458  | -1.194033 |
| H | 0.612615  | -0.752129 | 1.498597  |
| H | 1.202582  | -1.812819 | 0.224551  |
| H | -1.249051 | -1.641642 | 0.162974  |
| H | -0.534977 | -1.027698 | -1.323895 |
| H | -2.412420 | 0.432225  | -0.426980 |
| H | -0.896511 | 1.319694  | -0.581123 |
| H | -1.434878 | 0.758510  | 1.010915  |

**Table S103.** MP2/6-31+G\*/PCM optimized Cartesian coordinates of the n-C<sub>4</sub>H<sub>10</sub> anti@ (H<sub>2</sub>O)<sub>28</sub> 5<sup>12</sup>6<sup>4</sup>-D<sub>2</sub> n-butane-clathrate.

|   |           |           |           |
|---|-----------|-----------|-----------|
| O | -2.988487 | 3.414168  | -1.567964 |
| H | -2.018525 | 3.584081  | -1.587262 |
| H | -3.136387 | 2.568471  | -2.051427 |
| O | -0.268363 | 4.178312  | -1.464261 |
| H | 0.421806  | 3.694806  | -2.002454 |
| H | -0.250985 | 5.095675  | -1.794386 |
| O | 1.684133  | 2.930680  | -2.864957 |
| H | 1.493752  | 2.008041  | -3.157960 |
| H | 2.483486  | 2.880488  | -2.290767 |
| O | -3.603512 | 0.996793  | -2.891167 |
| H | -4.140841 | 1.186061  | -3.682478 |
| H | -4.209556 | 0.491778  | -2.275315 |
| O | -1.380714 | -0.567786 | -3.692796 |
| H | -1.513113 | -1.457515 | -3.290634 |
| H | -2.127718 | -0.011560 | -3.368484 |
| O | 1.178029  | 0.329633  | -3.806698 |
| H | 1.303056  | 0.381150  | -4.772777 |
| H | 0.238053  | 0.010520  | -3.693189 |
| O | -4.050496 | -2.958673 | -0.962548 |
| H | -3.277211 | -3.057248 | -1.577198 |
| H | -4.656019 | -3.689364 | -1.186234 |

|   |           |           |           |
|---|-----------|-----------|-----------|
| O | -5.235820 | -0.390280 | -1.200872 |
| H | -5.209614 | 0.002537  | -0.290326 |
| H | -4.845730 | -1.289515 | -1.108028 |
| O | 3.954010  | 2.900267  | -1.180746 |
| H | 3.701894  | 3.048968  | -0.231998 |
| H | 4.567912  | 3.624802  | -1.402065 |
| O | 5.142522  | 0.340158  | -1.467306 |
| H | 4.755601  | 1.239882  | -1.364195 |
| H | 5.196723  | -0.017953 | -0.551880 |
| O | 3.396123  | -1.229699 | -2.971083 |
| H | 3.987025  | -0.641434 | -2.434756 |
| H | 2.600081  | -0.693400 | -3.193730 |
| O | 3.193321  | 3.267892  | 1.465546  |
| H | 3.688187  | 3.994349  | 1.888281  |
| H | 3.401330  | 2.453547  | 2.009754  |
| O | 0.510741  | 4.160053  | 1.238736  |
| H | 0.280422  | 4.143730  | 0.279406  |
| H | 1.415223  | 3.778103  | 1.316220  |
| O | -1.535511 | 3.176259  | 2.714137  |
| H | -0.754251 | 3.519151  | 2.193572  |
| H | -1.651371 | 3.805352  | 3.449828  |
| O | 3.772068  | 1.039959  | 2.897171  |
| H | 2.949026  | 0.567311  | 3.167381  |
| H | 4.265371  | 0.411382  | 2.320052  |
| O | 1.413542  | -0.289044 | 3.747048  |
| H | 1.549814  | -0.387375 | 4.708209  |
| H | 1.474888  | -1.219388 | 3.385680  |
| O | -1.288317 | 0.570420  | 3.709853  |
| H | -0.354804 | 0.261410  | 3.642415  |
| H | -1.308322 | 1.483431  | 3.336984  |
| O | 5.229409  | -0.702196 | 1.186542  |
| H | 4.795741  | -1.593213 | 1.158245  |
| H | 6.136356  | -0.862790 | 1.506991  |
| O | -5.178231 | 0.742500  | 1.345512  |
| H | -4.707090 | 1.610381  | 1.262028  |
| H | -4.615930 | 0.203945  | 1.947307  |
| O | -3.861113 | 3.181033  | 1.066913  |
| H | -3.049344 | 3.186057  | 1.624193  |
| H | -3.539988 | 3.269100  | 0.134431  |
| O | -3.544170 | -0.823983 | 3.109988  |
| H | -2.695750 | -0.346690 | 3.330046  |
| H | -3.983202 | -0.980881 | 3.966079  |
| O | 1.641750  | -2.821964 | 2.815471  |
| H | 2.375594  | -2.924002 | 2.166463  |
| H | 0.844716  | -3.214073 | 2.387277  |
| O | 3.828415  | -3.098030 | 1.035099  |
| H | 4.346805  | -3.892556 | 1.261837  |
| H | 3.503752  | -3.247504 | 0.106779  |
| O | -1.827083 | -3.136839 | -2.614991 |
| H | -1.068039 | -3.518930 | -2.084656 |
| H | -1.966872 | -3.759711 | -3.352433 |
| O | 0.147417  | -4.221532 | -1.129985 |
| H | 1.060575  | -3.871338 | -1.250388 |
| H | -0.056347 | -4.147591 | -0.167656 |
| O | 2.826614  | -3.417207 | -1.513582 |
| H | 3.253751  | -4.152693 | -1.991206 |
| H | 3.012631  | -2.599628 | -2.066201 |
| O | -0.555661 | -4.084084 | 1.592772  |

|   |           |           |           |
|---|-----------|-----------|-----------|
| H | -0.605501 | -4.988310 | 1.954234  |
| H | -1.488625 | -3.727514 | 1.653650  |
| O | -3.118224 | -3.212379 | 1.695700  |
| H | -3.463363 | -3.075417 | 0.782813  |
| H | -3.268598 | -2.365397 | 2.178598  |
| C | 1.912895  | 0.070835  | -0.036774 |
| C | 0.506278  | -0.513176 | -0.083050 |
| C | -0.564893 | 0.567833  | -0.195654 |
| C | -1.971669 | -0.004653 | -0.077138 |
| H | 2.675017  | -0.709005 | 0.047267  |
| H | 2.019865  | 0.742589  | 0.820567  |
| H | 2.123142  | 0.648430  | -0.942007 |
| H | 0.322285  | -1.105858 | 0.823793  |
| H | 0.412721  | -1.204871 | -0.931812 |
| H | -0.452120 | 1.093314  | -1.154025 |
| H | -0.403714 | 1.317475  | 0.591703  |
| H | -2.733892 | 0.769582  | -0.185981 |
| H | -2.111154 | -0.477983 | 0.899720  |
| H | -2.147430 | -0.765671 | -0.844479 |

---
